# Supplementary material for: Discovery, Optimization, and Cellular Activities of 2-(Aroylamino)cinnamamide Derivatives Against Colon Cancer
Source: Preprints.org preprint supplement (doi:10.20944/preprints202002.0453.v1), 2020-02-29
Supplement: Supplementary file 1 [file supplementary]

**Discovery, optimization, and cellular activities of 2-(aroylamino)cinnamamide derivatives against colon cancer**

Abdelsattar M. Omar<sup>1,2</sup>, Moustafa E. El-Araby<sup>1\*</sup> Tamer M. Abdelghany<sup>3</sup>, Martin K. Safo<sup>4</sup>,  
Mostafa H. Ahmed<sup>4</sup>, Rio Boothello<sup>5,6</sup>, Bhaumik B Patel<sup>5,6</sup> Mohamed S. Abdel-Bakky<sup>4</sup>, Azizah  
M. Malebari<sup>1</sup>, Radwan S. Elhaggar<sup>7</sup>

<sup>1</sup> Department of Pharmaceutical Chemistry, Faculty of Pharmacy, King Abdulaziz University, Jeddah 21589, Saudi Arabia

<sup>2</sup> Department of Pharmaceutical Chemistry, Faculty of Pharmacy, Al-Azhar University, Cairo 11884, Egypt

<sup>3</sup> Department of Pharmacology, Faculty of Pharmacy, Al-Azhar University, Cairo 11884, Egypt

<sup>4</sup> Department of Medicinal Chemistry, and the Institute for Structural Biology, Drug Discovery and Development, School of Pharmacy, Virginia Commonwealth University, Richmond, VA 23298, USA

<sup>5</sup> Division of Hematology and Oncology, Department of Medicine, Virginia Commonwealth University, and Massey Cancer Center, Richmond, VA 23298. USA

<sup>6</sup> Hunter Holmes McGuire VA Medical Center, Richmond, VA 23249, USA

<sup>7</sup> Department of Pharmaceutical Chemistry, Faculty of Pharmacy, Helwan University, Cairo 11790, Egypt

\* Correspondence: madaoud@kau.edu.sa

## S1. Cellular mechanisms of compound 1512

### S1-A. Induction of apoptosis and apoptotic changes in HCT-116 cancer cell lines upon treatment with 4112.

#### Method.

See Main test section 4.2.8. Nuclear fragmentation by DAPI staining.

#### Result.

1512 caused extensive changes in the nuclear matter as illustrated in Figure S1-A.

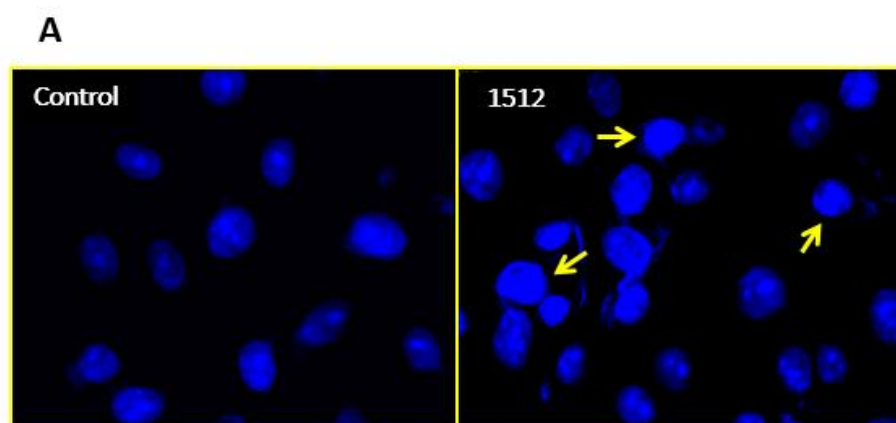

**Figure S1-A.** Effect of 1512 at 32  $\mu\text{M}$  ( $\text{IC}_{50}$  concentration) for 48 h on the nuclear structures of HCT-116 cells. Treated cells show nuclear condensation and fragmentation along with the condensed blue fluorescence of DAPI.

### S1-B. Cell cycle distribution upon treatment with 1512

#### Method:

To analyze the DNA content by flow cytometry, HCT-116 cells were seeded at a density of  $3 \times 10^6$  cell/ T 75 flask for 24 h and then exposed to different compounds at their  $\text{IC}_{50}$  values for 24 h. The cells were collected by trypsinization, washed with phosphate buffered saline (PBS) and fixed in ice-cold absolute alcohol. Thereafter, cells were stained using Cycletest™ Plus DNA Reagent Kit (BD Biosciences, San Jose, CA) according to the manufacturer's instructions. Cell cycle distribution was determined using a FACS Calibur flow cytometer (BD Biosciences, San Jose, CA).

#### Result:

The exposure of the cells to **1512** led to a significant increase in the proportion of cells in pre-G1 phase (Up to 9-fold compared to the control) (Figure S1-B). Accumulation of cells in pre-G1 phase, likely as a result of degradation or fragmentation of genetic material indicates a possible role for apoptosis through compound-induced growth inhibition.

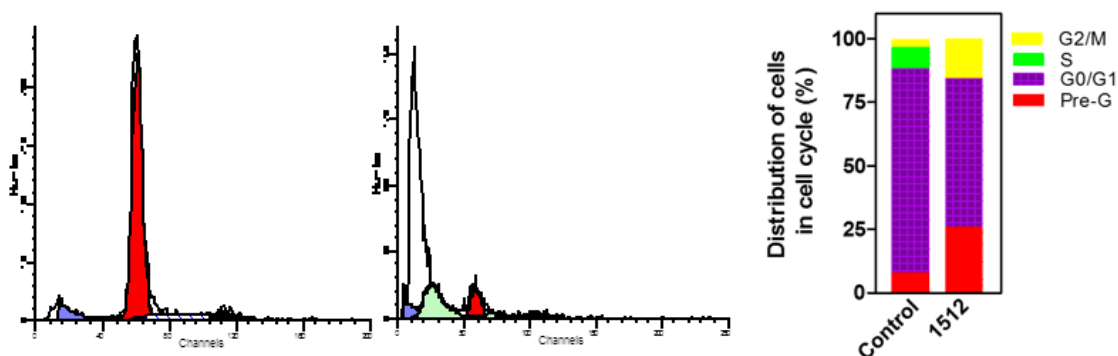

**Figure S1-B. Representative DNA histograms of HCT-116 cells following treatment with 1512 at 32  $\mu$ M (IC<sub>50</sub> concentration) for 24 h.**

### S1-C. Changes in marker proteins cyclin B1 cyclin D1, Phospho-histone3 and cleaved caspase3 in apoptotic cells upon treatment with 1512.

#### Method:

Cells were cultured on sterile 22 mm<sup>2</sup> cover slips (Harvard Apparatus, MA, USA) in sterile six well plates at a density of  $2 \times 10^5$  cells/well. 24 h after seeding, cells were exposed to IC<sub>50</sub> of the tested compound in fresh medium for 24 h. At the end of the exposure, cells attached to cover slips were washed with PBS and fixed with 3.7% paraformaldehyde for 10 min, permeabilized with 0.25% Triton X-100 in TBST containing 0.01% Tween 20 for 10 min, and blocked for 1 hr with 5% goat serum in TBST. The fixed and permeabilized cells were incubated with rabbit mAb Cyclin B1, rabbit mAb Cyclin D1, mouse mAb Phosphohistone-H3 or mouse cleaved caspase-3 rabbit mAb (Cell signaling technology, MA, USA) at a dilution of 1:500 in blocking solution overnight at 4°C, followed by secondary anti-mouse Alexa fluor-488- (Invitrogen, Carlsbad, CA) and Cy3-goat anti-Rabbit antibody (Jackson Immuno Research, West Grove, PA, USA) in 1:1000 dilution in the blocking solution for 1 hr at room temperature in the dark. 4',6'-Diamidino-2-Phenylindole, dihydrochloride (DAPI) (Sigma–Aldrich, St. Louis, MO, USA) was used as counter stain to stain the DNA. The cover slips were then mounted on a glass slide with anti-fade mounting medium and viewed with an epifluorescence microscope, Leica, DM 5500 B (Leica, Buffalo Grove, IL, USA) at a magnification of 60 $\times$ , and data were captured digitally and quantified using the microscope provided software.

#### Result:

Accumulation of the apoptotic markers of cyclin B1, cyclin D1, phosphor-histone3 and cleaved caspase3 further confirmed the apoptotic changes upon exposure to compound **1512** (Figure S1-C).

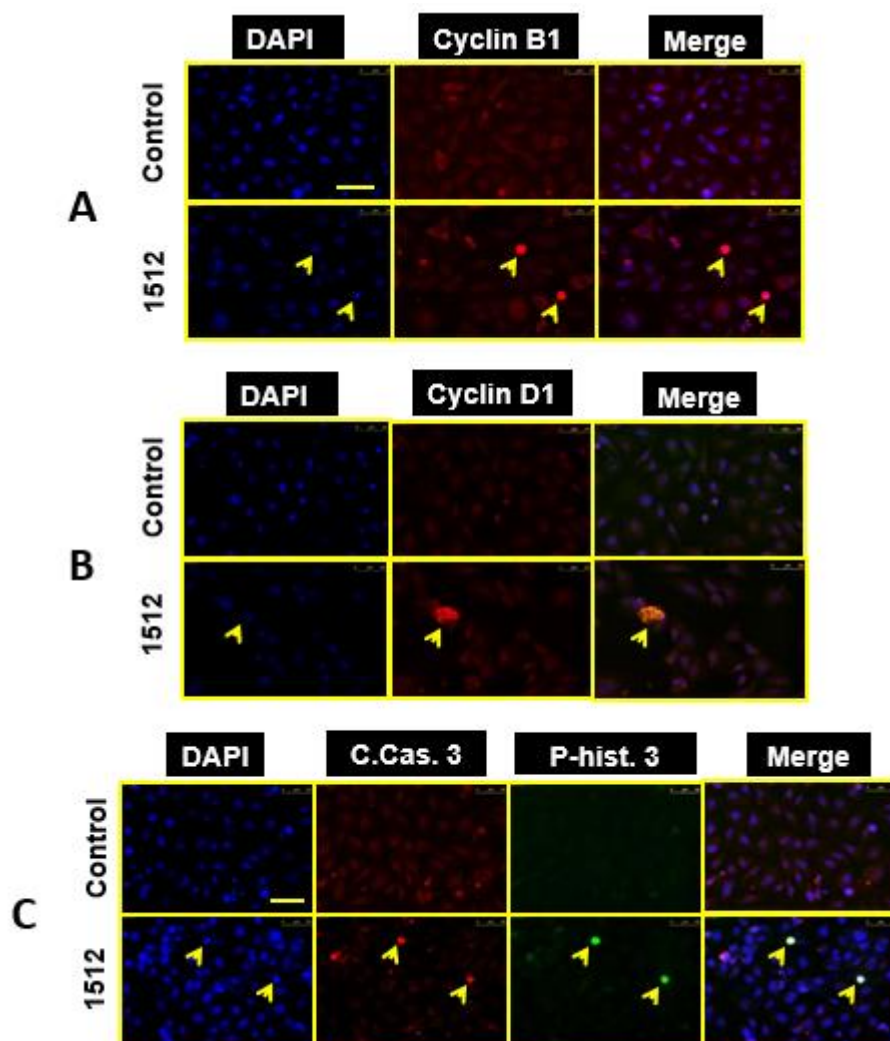

**Figure S1-C.** Effects of 1512 and on cellular expression of cyclin B1 (A) cyclin D1 (B) in HCT-116 after treatment for 24 h compared to control. Cells were stained with DAPI and incubated with a Cy3-coupled secondary antibody to visualize the distribution of cyclin B1 and cyclin D1 (red) proteins. Treatment of HCT-116 with 1512 increased the nuclear expression of cyclin B1 and cyclin D1 (arrow head) compared with the untreated cells. Scale bar, 50  $\mu$ m. (C) Effect of 1512 on the cellular expression of caspase-3 (C.Cas. 3) and phospho-histone 3 (P-hist. 3) in human colon cancer cells (HCT-116). The cells were stained with DAPI to visualize nuclei (blue) and with Alexa Fluor 488- and Cy3-coupled secondary antibodies to visualize the distribution of caspase-3 (red) and phospho-histone-3 (green) proteins using immunofluorescence microscopy. The nuclear expression of the pro-apoptotic proteins, activated caspase 3 and phospho-histone 3 (yellow arrows) compared to the untreated cells. Scale bar, 50  $\mu$ m.

#### S1-D. Elevation of oxidative stress indicators within HCT-116 cells upon treatment with 1512.

The underlying mechanism by which **1512** induced cancer cells to undergo apoptotic cell death was investigated by measuring changes in redox indicators within HCT-116 CRC cell lines. In this study, we first checked the influence of **1512** on cellular activities of the peroxide scavenging enzymes catalase and superoxide dismutase (SOD) (**Figure 8A**).

##### Method:

For DHE and DCFDA, cells were cultured on sterile 22 mm<sup>2</sup> cover slips (Harvard Apparatus, MA, USA) in sterile six well plates at a density of  $2 \times 10^5$  cells/well. 24 h after seeding, cells were exposed to IC<sub>50</sub> of the tested compounds in fresh medium for 24 h. At the end of the exposure, cells attached to cover slips were washed thrice with PBS and incubated with DHE 10  $\mu$ M or DCFDA 10  $\mu$ M for 30 min at 37 °C in the dark. Thereafter, cells were washed thrice

with PBS and the cover slips were then mounted on a glass slide with anti-fade mounting medium containing 4',6'-Diamidino-2-Phenylindole, dihydrochloride (DAPI) (Sigma–Aldrich, St. Louis, MO, USA), which was used as counter stain and viewed with an epifluorescence microscope, Leica, DM 5500 B (Leica, Buffalo Grove, IL, USA) at a magnification of 60 $\times$ . Data were captured digitally and quantified using the microscope provided software.

For assessment of SOD and CAT activities as well as SOD and MDA levels, 4  $\times 10^6$  cell/ T 75 flask were exposed to the IC<sub>50</sub> of tested compound for 24 h. The cells were collected by trypsinization and washed twice with PBS. Cells were directly homogenized in PBS on ice with a Dounce homogenizer 3 times (each 25 strokes) at 10-min intervals, then centrifuged at 15000 rpm for 15 min at 4 °C. An aliquot was kept to determine the protein concentration using a BioRad protein assay DC kit (Bio Rad Laboratories, CA). Different parameters were then assessed using equal protein amounts in all samples and employing the specified kit according to the manufacturer's instructions. (3, 4, 5 and 6).

#### Results:

Activities of both enzymes significantly diminished to 34.7% and 25.1% respectively, compared to untreated cells (control). However, the cellular contents of the non-enzymatic SH containing redox markers, such as reduced glutathione (GSH) and malondialdehyde (MDA, a lipid oxidation marker) were only slightly affected (95.2% and 103.4% respectively, compared to control).

To confirm the increased intracellular ROS production, we performed dihydroethidium (DHE) staining test at which untreated HCT cancer cells were compared to **1512**-treated cells (at 32  $\mu$ M, the IC<sub>50</sub> value). As seen in figure 8B, the cells treated with **1512** attained more red fluorescence than the untreated cells indicating higher cellular peroxide content, which resulted from increased ROS production within the drug-treated cancer cells <sup>1</sup>.

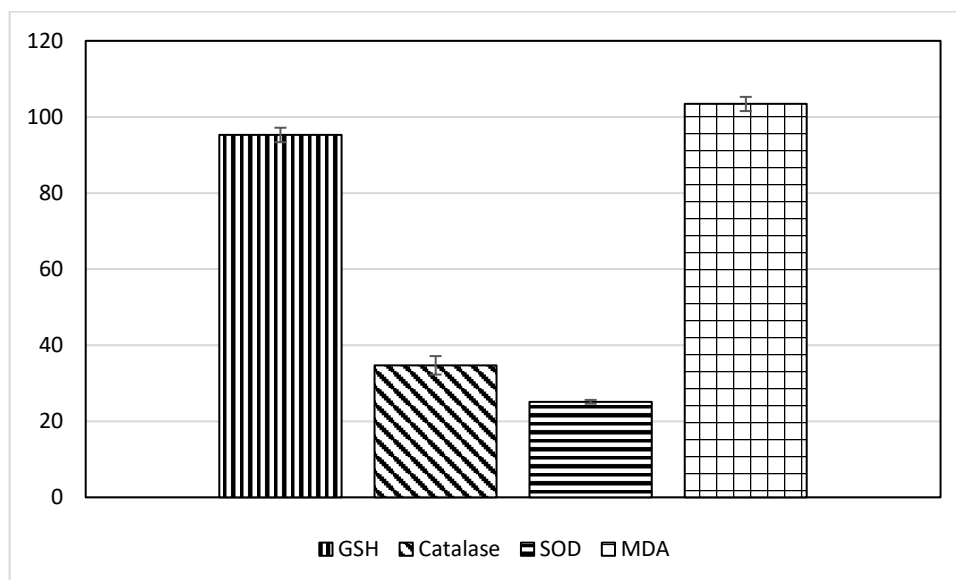

**Figure 8. (A) Effect of 1512 (32  $\mu$ M, 48 h) on redox indicators with HCT-116. The values are expressed as percentage of controls and calculated from the means of three independent experiments. (B) Effect of compound 1512 on superoxide anion generation in HCT-116 cells using DHE staining method. Red fluorescence represents DHE staining and DAPI was used as counter nuclear stain.**

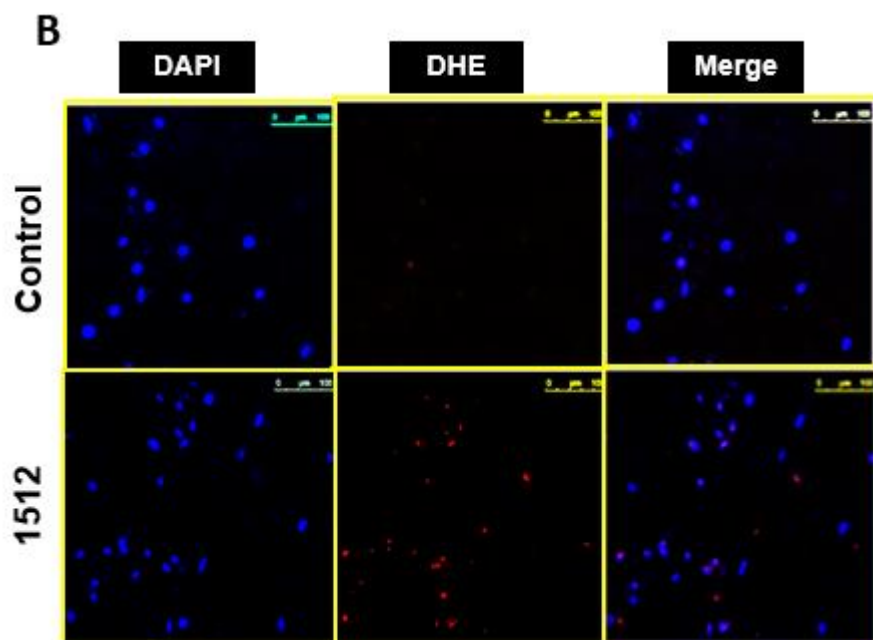

Figure S1-D. (A) Effect of 1512 (32  $\mu$ M, 48 h) on redox indicators with HCT-116. The values are expressed as percentage of controls and calculated from the means of three independent experiments. (B) Effect of compound 1512 on superoxide anion generation in HCT-116 cells using DHE staining method. Red fluorescence represents DHE staining and DAPI was used as counter nuclear stain.

## S2. Spectra of Compounds

Spectra of (1501)<sup>2-3</sup>

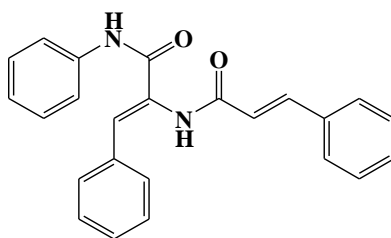

<sup>1</sup>H NMR

## Supplementary Information

This report was created by ACD/NMR Processor Academic Edition. For more information go to [www.acdlabs.com/nmrproc/](http://www.acdlabs.com/nmrproc/)

1501A

4/23/2017 10:06:13 PM

|                        |                                                                                                                          |                        |                          |                      |                      |
|------------------------|--------------------------------------------------------------------------------------------------------------------------|------------------------|--------------------------|----------------------|----------------------|
| Acquisition Time (sec) | 2.8584                                                                                                                   | Comment                | Dr.A.Omar DMSO Cin 1501A | Date                 | 30 Mar 2013 11:51:12 |
| Date Stamp             | 30 Mar 2013 11:51:12                                                                                                     |                        |                          |                      |                      |
| File Name              | E:\Google Drive\AAA AAA Research\AA AA Projects\CIN\Safe-Cinamamide\SupportingInformation\Spectral\Cin 1501A dmsol\1.fid |                        |                          |                      |                      |
| Frequency (MHz)        | 600.13                                                                                                                   | Nucleus                | <sup>1</sup> H           | Number of Transients | 16                   |
| Original Points Count  | 32768                                                                                                                    | Owner                  | nmr                      | Points Count         | 32768                |
| Receiver Gain          | 83.44                                                                                                                    | SW(cyclical) (Hz)      | 12335.53                 | Pulse Sequence       | zg30                 |
| Spectrum Type          | STANDARD                                                                                                                 | Sweep Width (Hz)       | 12335.15                 | Solvent              | DMSO-d6              |
|                        |                                                                                                                          | Temperature (degree C) | 25.014                   | Spectrum Offset (Hz) | 3706.0493            |

<sup>1</sup>H NMR (DMSO-*d*<sub>6</sub>)  $\delta$  ppm 9.95 (br. s., 1 H), 7.61 - 7.68 (m, 5 H), 7.55 (d, *J*=15.81 Hz, 1 H), 7.41 - 7.49 (m, 7 H), 7.36 - 7.41 (m, 1 H), 7.23 (s, 1 H), 6.89 (d, *J*=15.81 Hz, 1 H)

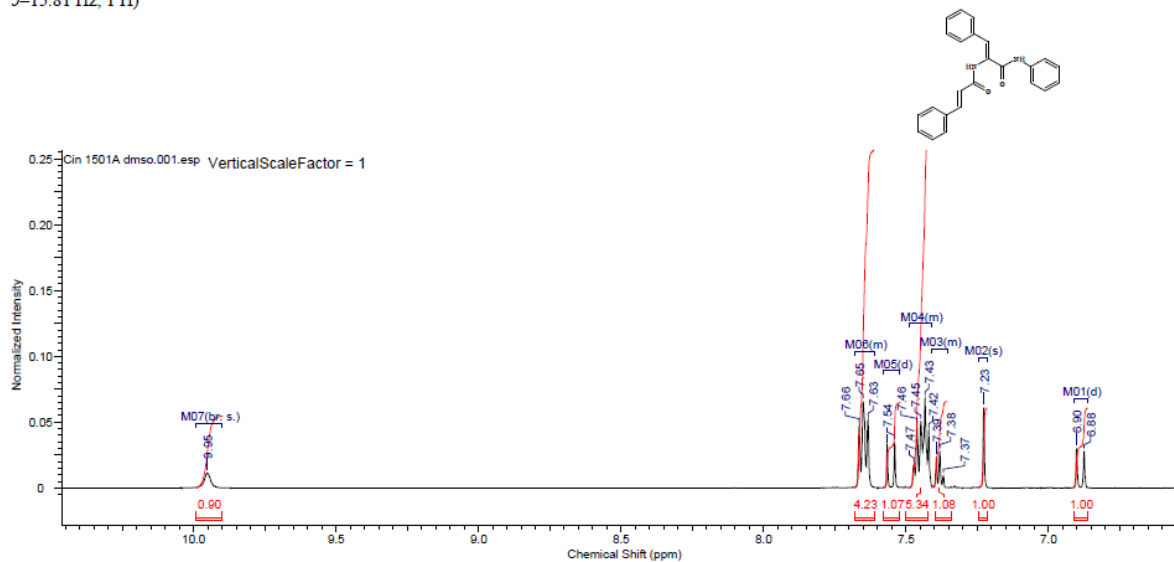

## Spectra of (1502)<sup>2, 4</sup>

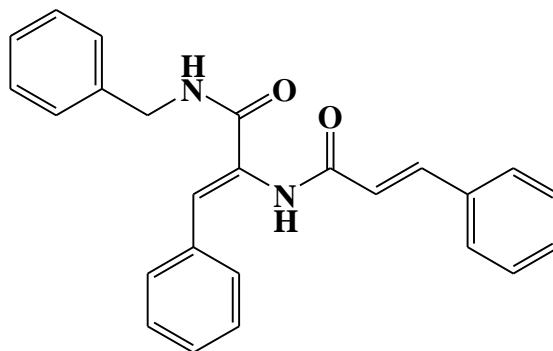

LC/MS

## Supplementary Information

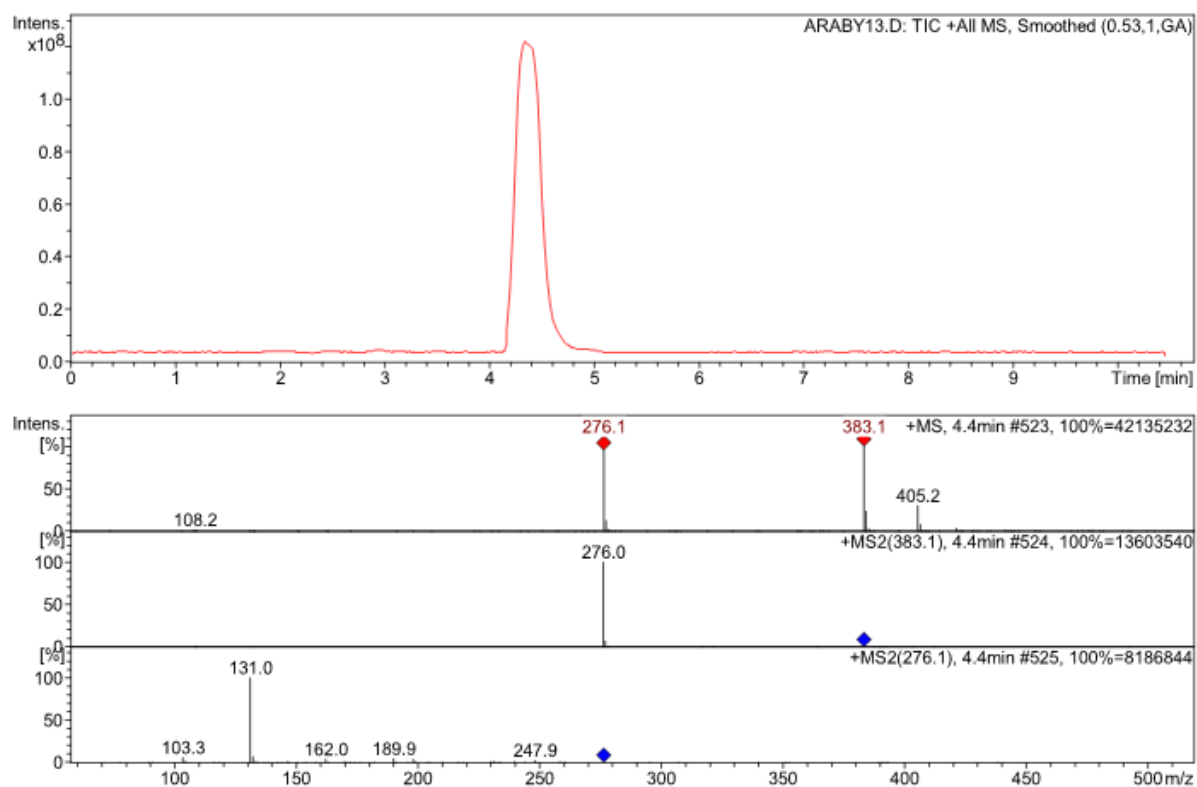

**FT-IR**



## Supplementary Information

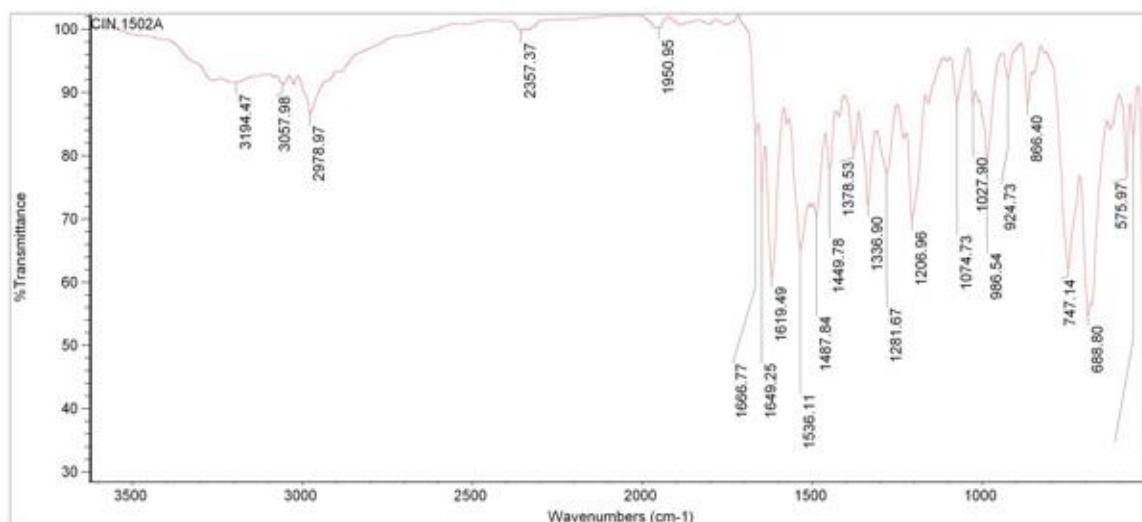

## <sup>1</sup>H NMR

This report was created by ACD/NMR Processor Academic Edition. For more information go to [www.acdlabs.com/nmrproc/](http://www.acdlabs.com/nmrproc/)

8/25/2013 6:50:15 PM

|                        |                                                          |                   |                                          |                          |                      |
|------------------------|----------------------------------------------------------|-------------------|------------------------------------------|--------------------------|----------------------|
| Acquisition Time (sec) | 2.6564                                                   | Comment           | Dr A.Mansour Acetone Cin-1502A 27-3-2013 | Date                     | 27 Mar 2013 14:01:20 |
| Date Stamp             | 27 Mar 2013 14:01:20                                     |                   |                                          |                          |                      |
| File Name              | D:\AAA Research\AAA Ongoing\CINN\Spectra\NMR\CIN15Series | NMR               | 20130707\CIN15series_1501to12            | 20130707\Cin-1502A\301fd |                      |
| Frequency (MHz)        | 600.13                                                   | Nucleus           | <sup>1</sup> H                           | Number of Transients     | 16                   |
| Original Points Count  | 32788                                                    | Owner             | nmr                                      | Points Count             | 32788                |
| Receiver Gain          | 173.48                                                   | SW(cyclical) (Hz) | 12335.53                                 | Solvent                  | Acetone              |
| Spectrum Type          | STANDARD                                                 | Sweep Width (Hz)  | 12335.15                                 | Temperature (degree C)   | 25.015               |
|                        |                                                          |                   |                                          | Spectrum Offset (Hz)     | 3706.0493            |
|                        |                                                          |                   |                                          | Pulse Sequence           | zg30                 |

<sup>1</sup>H NMR (600 MHz, Acetone) δ ppm 4.52 - 4.58 (m, 2 H) 6.96 (d, *J*=15.43 Hz, 1 H) 7.24 (t, *J*=7.34 Hz, 1 H) 7.29 - 7.35 (m, 4 H) 7.36 - 7.48 (m, 8 H) 7.57 - 7.68 (m, 5 H) 8.08 (br. s., 1 H)

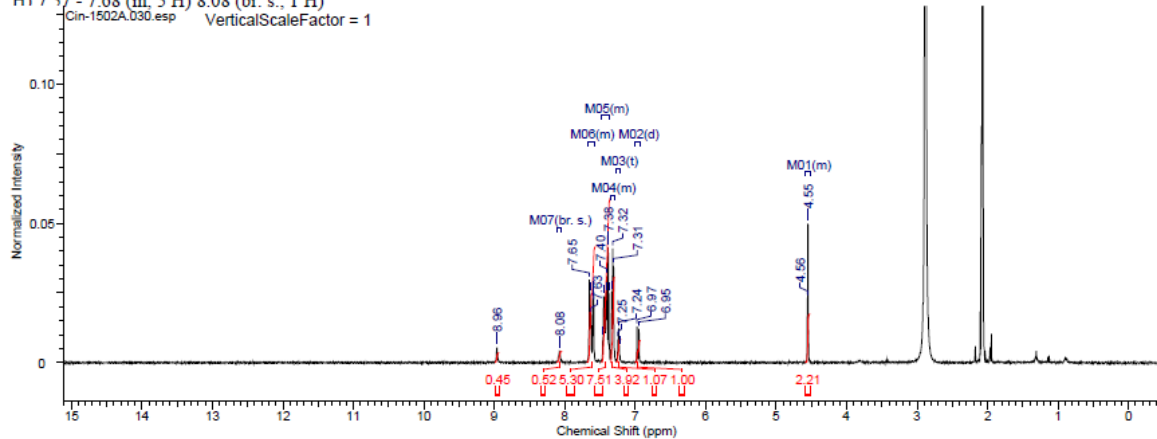

## Spectra of (1503)

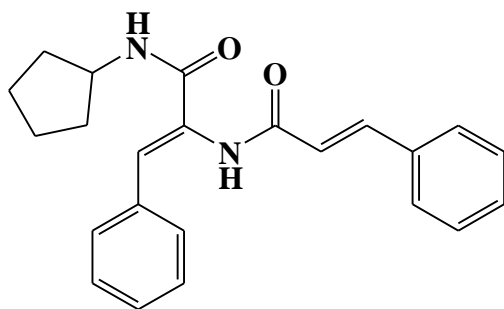 $^1\text{H}$  NMR

This report was created by ACD/NMR Processor Academic Edition. For more information go to [www.acdlabs.com/nmrproc/](http://www.acdlabs.com/nmrproc/)

1503

2018-10-01 7:54:52 AM

|                        |                                                               |                                   |                                          |
|------------------------|---------------------------------------------------------------|-----------------------------------|------------------------------------------|
| Formula                | C <sub>22</sub> H <sub>24</sub> N <sub>2</sub> O <sub>2</sub> | FW                                | 360.4489                                 |
| Acquisition Time (sec) | 2.6564                                                        | Comment                           | Dr.A.Mansour Acetone Cin-1503A 27-3-2013 |
| Date Stamp             | 27 Mar 2013 14:07:44                                          | Date                              | 27 Mar 2013 14:07:44                     |
| File Name              | D:\AAA_Research\AAA_Ongoing\CINN\Spectra\NMR\CIN15Series      | NMR_20130707\CIN15Series_1501to12 | 20130707\Cin-1503A\501fid                |
| Frequency (MHz)        | 600.13                                                        | Nucleus                           | $^1\text{H}$                             |
| Original Points Count  | 32768                                                         | Number of Transients              | 16                                       |
| Receiver Gain          | 173.48                                                        | Owner                             | nmr                                      |
| Spectrum Type          | STANDARD                                                      | Points Count                      | 32768                                    |
|                        |                                                               | Solvent                           | Acetone                                  |
|                        |                                                               | Spectrum Offset (Hz)              | 3706.0493                                |
|                        |                                                               | Sweep Width (Hz)                  | 12335.15                                 |
|                        |                                                               | Temperature (degree C)            | 25.012                                   |

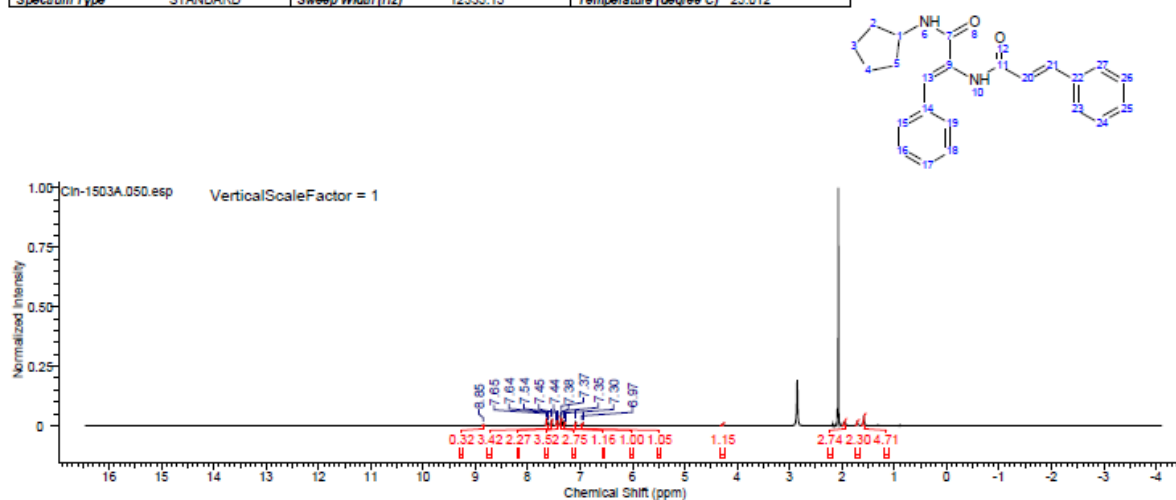

## Spectra of (1505)

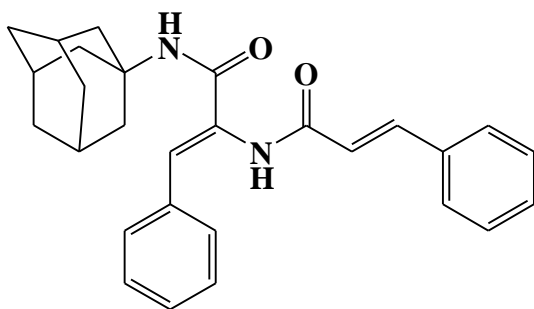

This report was created by ACD/NMR Processor Academic Edition. For more information go to [www.acdlabs.com/nmrproc/](http://www.acdlabs.com/nmrproc/)

## CIN-1505A-4m

1/6/2017 09:14:03 AM

|                        |                                                                                                                                     |                    |                                          |                        |                      |
|------------------------|-------------------------------------------------------------------------------------------------------------------------------------|--------------------|------------------------------------------|------------------------|----------------------|
| Acquisition Time (sec) | 2.6564                                                                                                                              | Comment            | Dr A.Mansour Acetone CIN-1505A 27-3-2013 | Date                   | 27 Mar 2013 13:54:56 |
| Date Stamp             | 27 Mar 2013 13:54:56                                                                                                                |                    |                                          |                        |                      |
| File Name              | E:\Google Drive\Projects\CIN\Safe-Cinnamamide\Spectra Bis-Cinnamamide\1H NMR\SecondBatch-Table4-4\ConfirmedCpdsNMR\CIN-1505A\10\fid |                    |                                          |                        |                      |
| Frequency (MHz)        | 600.13                                                                                                                              | Nucleus            | <sup>1</sup> H                           | Number of Transients   | 16                   |
| Original Points Count  | 32768                                                                                                                               | Owner              | nmr                                      | Points Count           | 32768                |
| Receiver Gain          | 140.47                                                                                                                              | SW (cyclical) (Hz) | 12335.53                                 | Solvent                | Acetone              |
| Spectrum Type          | STANDARD                                                                                                                            | Sweep Width (Hz)   | 12335.15                                 | Temperature (degree C) | 25.012               |
|                        |                                                                                                                                     |                    |                                          | Pulse Sequence         | zgpg30               |
|                        |                                                                                                                                     |                    |                                          | Spectrum Offset (Hz)   | 3706.0493            |

<sup>1</sup>H NMR (Acetone)  $\delta$  ppm 7.61 - 7.68 (m, 3 H), 7.54 (d,  $J=7.53$  Hz, 2 H), 7.40 - 7.48 (m, 3 H), 7.37 (t,  $J=7.53$  Hz, 2 H), 7.27 - 7.32 (m, 1 H), 7.05 (br. s., 1 H), 6.98 (d,  $J=15.43$  Hz, 1 H), 6.76 (br. s., 1 H), 2.10 - 2.15 (m, 6 H), 1.99 - 2.03 (m, 1 H), 1.73 (br. s., 6 H), 1.67 (d,  $J=12.05$  Hz, 1 H), 1.61 (d,  $J=11.29$  Hz, 1 H), 1.55 - 1.59 (m, 1 H)

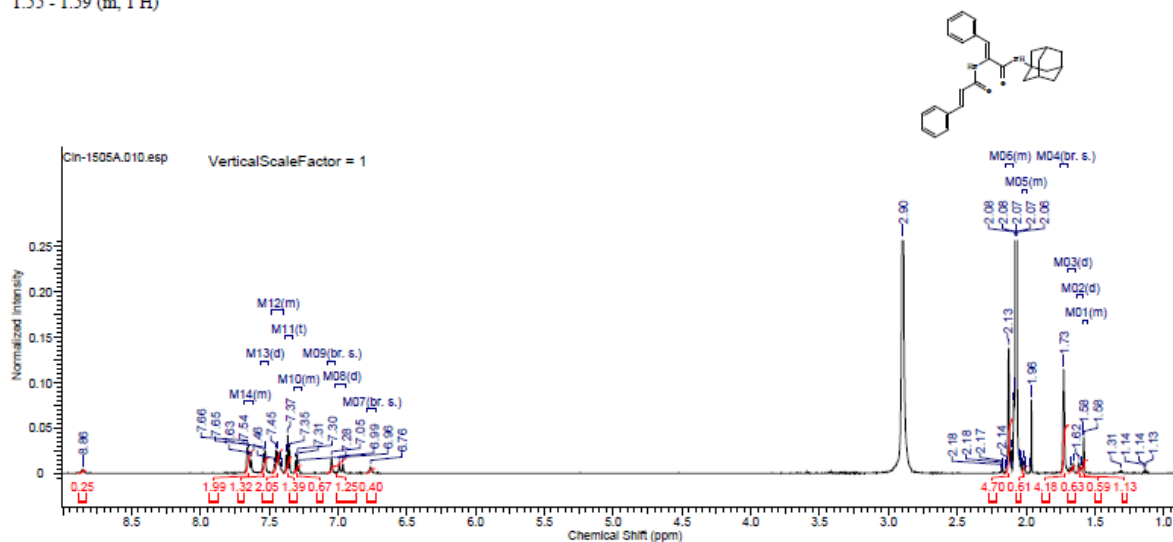

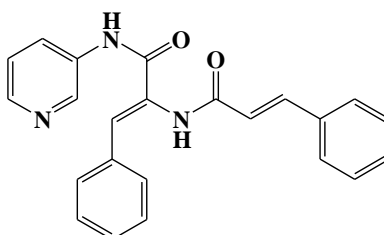

The figure displays a Total Ion Chromatogram (TIC) and three stacked mass spectra for compound 1.

**Top Panel: TIC**

- Y-axis:** Intensity (Intens.) x 10<sup>7</sup>.
- X-axis:** Time [min], ranging from 0 to 14.
- Peak:** A single, sharp, prominent peak is observed at approximately 7.4 minutes.
- Legend:** EIC 370.0 +All MS, Smoothed (0.58,1,GA), Smoothed (0.58,1,GA).

**Bottom Panel: Mass Spectra**

The bottom panel shows three stacked mass spectra, all sharing a common X-axis representing the mass-to-charge ratio (m/z) from 0 to 800.

- Top Spectrum (+MS, 7.4min #833, 100%=40060460):** Shows the base peak at m/z 370.2 (red triangle) and another significant peak at m/z 392.2 (red diamond).
- Middle Spectrum (+MS2(370.2), 7.4min #834, 100%=7171939):** Shows the base peak at m/z 276.0 (black triangle) and a smaller peak at m/z 276.1 (black triangle).
- Bottom Spectrum (+MS2(392.2), 7.4min #835, 100%=50567):** Shows the base peak at m/z 374.1 (black triangle) and several other peaks including m/z 131.1, 240.1, 117.0, 206.9, 301.1, 430.8, 468.5, 505.1, and 782.2.

## 1507

|                        |                                                                                                                     |                        |                      |                      |
|------------------------|---------------------------------------------------------------------------------------------------------------------|------------------------|----------------------|----------------------|
| Formula                | C <sub>10</sub> H <sub>16</sub> N <sub>2</sub> O <sub>2</sub>                                                       | PW                     | 369.4159             |                      |
| Acquisition Time (sec) | 2.6554                                                                                                              | Comment                | Dr A.Mansour Acetone | Cin-15074 27-3-2013  |
| Date Stamp             | 27 Mar 2013 14:26:56                                                                                                |                        |                      | Date                 |
| File Name              | D:\AAA_Research\AAA_Ongqing\OngqingSpectra\NMR\CIN15Series NMR 20130787\CIN15series 1501to12_20130707\Cin-15074.nmr |                        |                      |                      |
| Frequency (MHz)        | 500.13                                                                                                              | Nucleus                | <sup>1</sup> H       | Number of Transients |
| Omega Probs Count      | 32768                                                                                                               |                        | nmr                  | 16                   |
| Resolution Gain        | 173.48                                                                                                              | Points Count           | 32768                | Origin               |
| Spectrum Type          | STANDARD                                                                                                            | Solvent                | Acetone              | seq                  |
|                        |                                                                                                                     | Sweep Width (Hz)       | 12335.53             | Pulse Sequence       |
|                        |                                                                                                                     |                        | 12335.15             | zgpg30               |
|                        |                                                                                                                     | Temperature (degree C) | 25.009               | Spectrum Offset (Hz) |
|                        |                                                                                                                     |                        |                      | 3795.0493            |

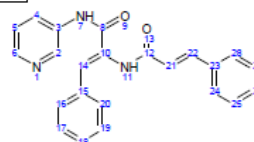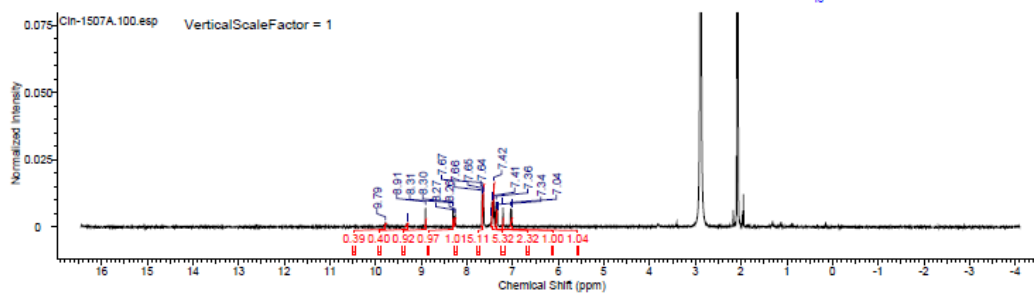

Spectra of (1508)<sup>4</sup>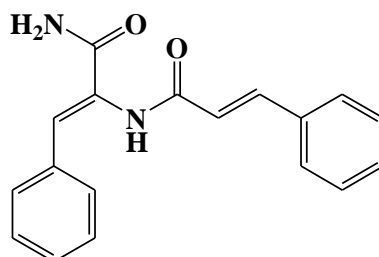<sup>1</sup>H NMR

This report was created by ACD/NMR Processor Academic Edition. For more information go to [www.acdlabs.com/nmrproc/](http://www.acdlabs.com/nmrproc/)

1508

10/6/2018 12:11:26 AM  
Dr.Mansour DMSO C1N-1508A

|                        |                                                         |                                   |                                        |                        |                      |
|------------------------|---------------------------------------------------------|-----------------------------------|----------------------------------------|------------------------|----------------------|
| Acquisition Time (sec) | 2.6564                                                  | Comment                           | Dr.Mansour DMSO C1N-1508A              | Date                   | 07 Jul 2013 14:07:44 |
| Date Stamp             | 07 Jul 2013 14:07:44                                    |                                   |                                        |                        |                      |
| File Name              | D:\AAA Research\AAA_Ongoing\NMR\Spectra\NMR\CIN15Series | NMR_20130707\CIN15Series_1501to12 | 20130707\Only20130707\Cin-1508A\7D\fid |                        |                      |
| Frequency (MHz)        | 600.13                                                  | Nucleus                           | <sup>1</sup> H                         | Number of Transients   | 16                   |
| Original Points Count  | 32768                                                   | Owner                             | nmr                                    | Points Count           | 32768                |
| Receiver Gain          | 37.66                                                   | SW(cyclical) (Hz)                 | 12335.53                               | Solvent                | DMSO-d <sub>6</sub>  |
| Spectrum Type          | STANDARD                                                | Sweep Width (Hz)                  | 12335.15                               | Temperature (degree C) | 25.000               |
|                        |                                                         |                                   |                                        | Pulse Sequence         | zg30                 |
|                        |                                                         |                                   |                                        | Spectrum Offset (Hz)   | 3706.0493            |

<sup>1</sup>H NMR (DMSO-d<sub>6</sub>) δ ppm 10.11 (br. s., 1 H), 7.75 (br. s., 1 H), 7.61 (d, *J*=6.78 Hz, 2 H), 7.55 (d, *J*=7.53 Hz, 2 H), 7.35 - 7.53 (m, 6 H), 7.31 (d, *J*=7.15 Hz, 1 H), 7.16 (br. s., 1 H), 7.10 (s, 1 H), 6.91 (d, *J*=15.81 Hz, 1 H)

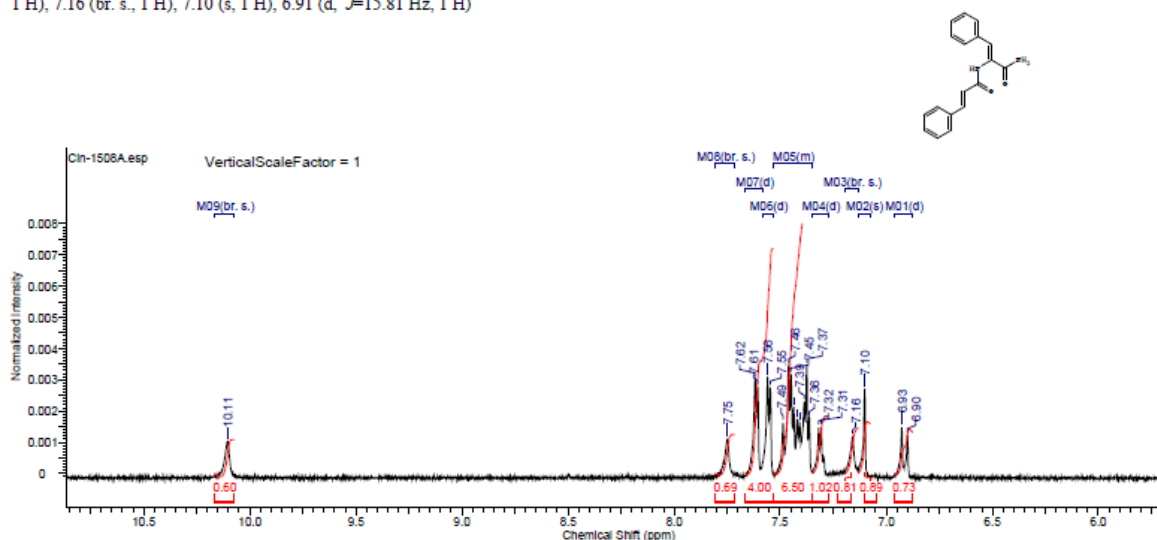

## Spectra of (1511)

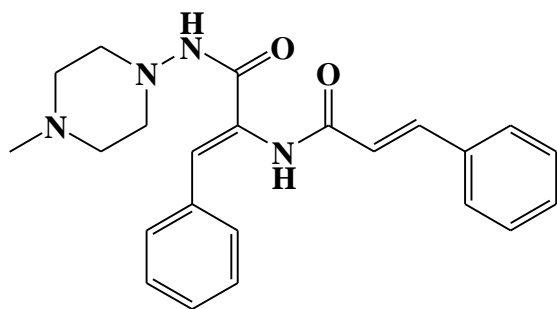<sup>1</sup>H NMR

This report was created by ACD/NMR Processor Academic Edition. For more information go to [www.acdlabs.com/nmrproc/](http://www.acdlabs.com/nmrproc/)

## Cin-1511A

|                        |                      |                   |                               |                        |                                                                  |
|------------------------|----------------------|-------------------|-------------------------------|------------------------|------------------------------------------------------------------|
| Acquisition Time (sec) | 2.6564               | Comment           | Dr.A.Mansour DMSO RAKAN 1511A | Date                   | 25 Feb 2015 14:44:00                                             |
| Date Stamp             | 25 Feb 2015 14:44:00 |                   |                               | File Name              | E:\Google Drive\Projects\CIN-Extension\Spectra\RAKAN 1511A\1.fid |
| Frequency (MHz)        | 600.13               | Nucleus           | <sup>1</sup> H                | Number of Transients   | 16                                                               |
| Original Points Count  | 32768                | Owner             | nmr                           | Points Count           | 32768                                                            |
| Receiver Gain          | 173.48               | SW(cyclical) (Hz) | 12335.53                      | Pulse Sequence         | zg30                                                             |
| Spectrum Type          | STANDARD             | Sweep Width (Hz)  | 12335.15                      | Solvent                | DMSO-d6                                                          |
|                        |                      |                   |                               | Spectrum Offset (Hz)   | 3706.0500                                                        |
|                        |                      |                   |                               | Temperature (degree C) | 25.001                                                           |

4/7/2015 04:15:42

<sup>1</sup>H NMR (600 MHz, DMSO-*d*<sub>6</sub>) δ ppm 2.77 (br. s., 2 H) 3.10 (br. s., 2 H) 3.14 - 3.22 (m, 4 H) 3.43 (br. s., 2 H) 6.75 (br. s., 1 H) 6.91 (d, *J*=15.81 Hz, 1 H) 7.30 - 7.35 (m, 1 H) 7.39 - 7.44 (m, 3 H) 7.44 - 7.48 (m, 2 H) 7.52 (d, *J*=15.81 Hz, 1 H) 7.56 (m, *J*=7.91 Hz, 2 H) 7.62 (d, *J*=7.53 Hz, 2 H) 9.58 (s, 1 H) 9.83 (s, 1 H)

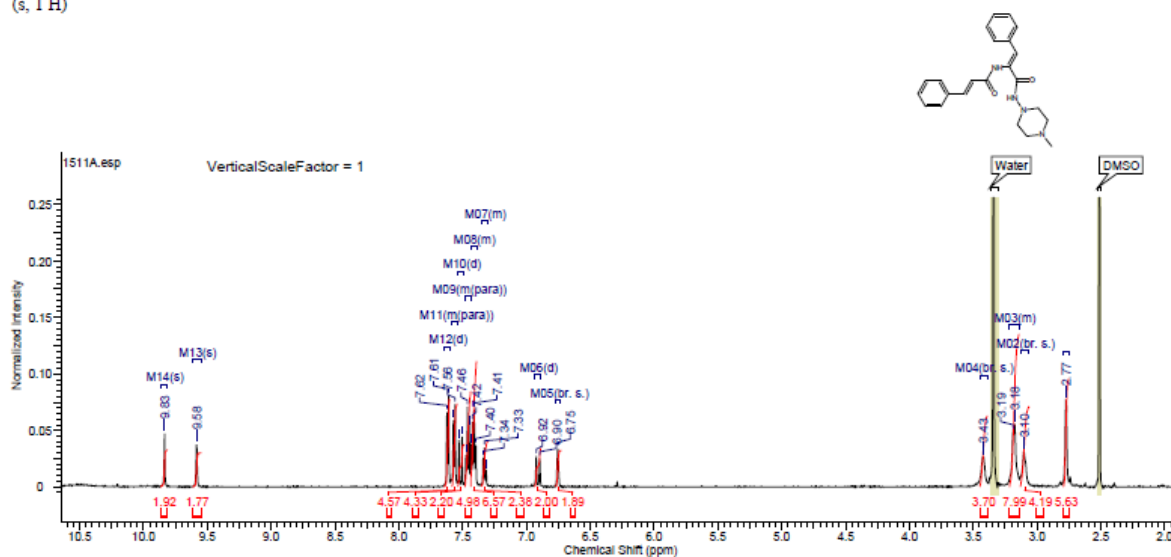

## Spectra of (1512)

The figure displays a Total Ion Chromatogram (TIC) and three mass spectra for compound 1.

**Chromatogram:** The TIC shows a single sharp peak at 3.6 minutes. The y-axis represents intensity (Intens. x10<sup>8</sup>) from 0.00 to 1.25, and the x-axis represents time (Time [min]) from 0 to 12. The legend indicates the data is 'TIC +All MS, Smoothed (0.52,1,GA)'.

**Mass Spectra:** Three mass spectra are shown, all with m/z on the x-axis (0 to 800) and relative intensity [%] on the y-axis (0 to 100).

- Top Spectrum:** Labeled '+MS, 3.6min #422, 100%=52031288'. The base peak is at m/z 276.1. Other significant peaks are at m/z 335.1 and 691.0.
- Middle Spectrum:** Labeled '+MS2(276.1), 3.6min #423, 100%=11056800'. The base peak is at m/z 130.9. Other significant peaks are at m/z 103.3, 189.9, and 247.9.
- Bottom Spectrum:** Labeled '+MS2(335.1), 3.6min #424, 100%=14037315'. The base peak is at m/z 276.0. Other significant peaks are at m/z 335.1 and 691.0.

This report was created by ACD/NMR Processor Academic Edition. For more information go to [www.acdlabs.com/nmrproc/](http://www.acdlabs.com/nmrproc/)

2018-10-01 7:58:31 AM

|                        |                                                                                                      |                      |                           |
|------------------------|------------------------------------------------------------------------------------------------------|----------------------|---------------------------|
| Formula                | C <sub>4</sub> H <sub>8</sub> N <sub>2</sub> O <sub>2</sub>                                          | FW                   | 334.4116                  |
| Acquisition Time (sec) | 2.6564                                                                                               | Comment              | Dr.Mansour DMSO C1N-1512A |
| Date Stamp             | 07 Jul 2013 14:22:40                                                                                 |                      |                           |
| File Name              | D:\AAA_Research\AAA_Nucleio\CI\N1\Spectra\NMR\CI\N1Series_1501to12_20130707\Garbage\CI\N-1512A\90fid |                      |                           |
| Frequency (MHz)        | 600.13                                                                                               | Channels             | 1H                        |
| Original Points Count  | 32768                                                                                                | Owner                | nmr                       |
| Receiver Gain          | 34.34                                                                                                | SWH (cycles/sec)     | 12335.53                  |
| Spectrum Type          | STANDARD                                                                                             | SWH (Hz)             | 12335.15                  |
|                        |                                                                                                      | Temp (deg C)         | 25.001                    |
|                        |                                                                                                      | Number of Transmits  | 16                        |
|                        |                                                                                                      | Poisson Count        | 32768                     |
|                        |                                                                                                      | Solvent              | DMSO-d6                   |
|                        |                                                                                                      | Pulse Sequence       | zg30                      |
|                        |                                                                                                      | Spectrum Offset (Hz) | 3706.0483                 |

<sup>1</sup>H NMR (600 MHz, DMSO-*d*<sub>6</sub>)  $\delta$  ppm 0.84 - 0.91 (m, 3 H) 1.44 - 1.53 (m, 2 H) 3.09 - 3.16 (m, 2 H) 6.90 (dd, *J*=15.81, 2.64 Hz, 1 H) 6.99 - 7.04 (m, 1 H) 7.28 - 7.34 (m, 1 H) 7.34 - 7.52 (m, 7 H) 7.56 (d, *J*=6.78 Hz, 2 H) 7.62 (d, *J*=7.15 Hz, 2 H) 8.15 - 8.22 (m, 1 H) 9.86 (br. s., 1 H)

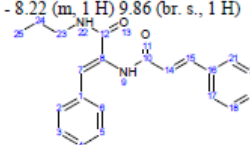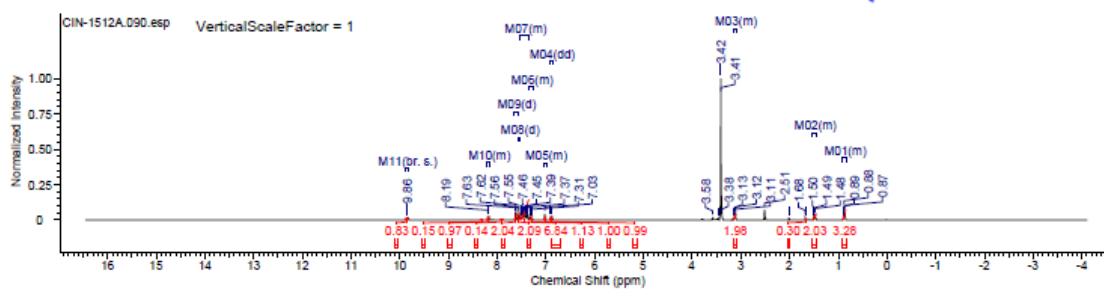

## Spectra of (1513)

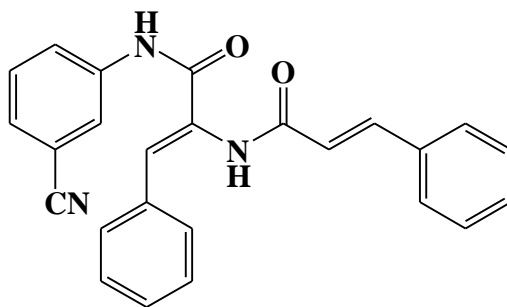

## LC/MS

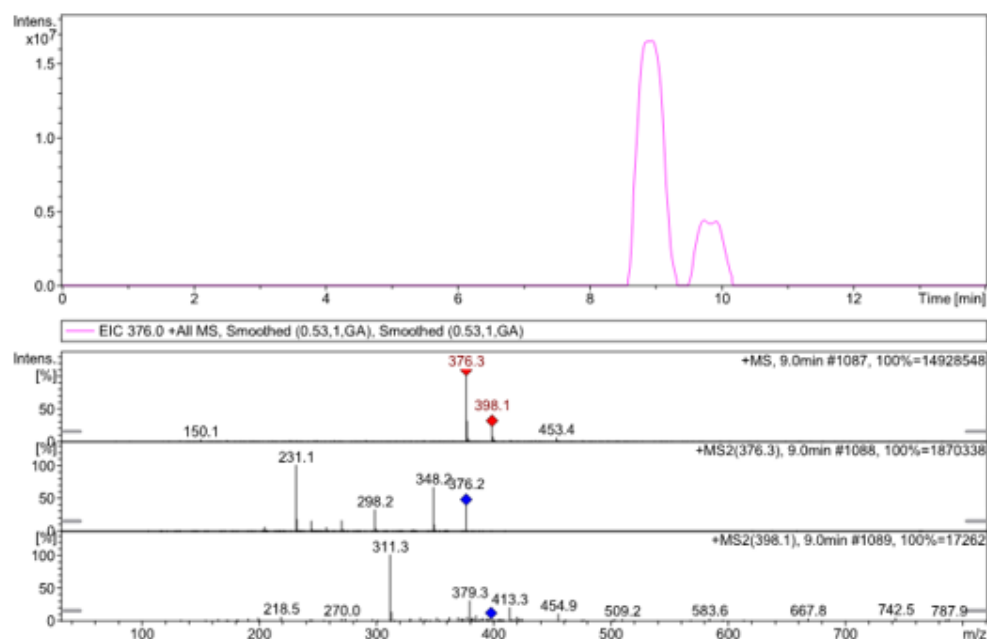 $^1\text{H}$  NMR

This report was created by ACD/NMR Processor Academic Edition. For more information go to [www.acdlabs.com/nmrproc/](http://www.acdlabs.com/nmrproc/)

1513

2018-10-06 5:28:54 PM

|                        |                                                         |                         |                                           |
|------------------------|---------------------------------------------------------|-------------------------|-------------------------------------------|
| Formula                | C <sub>21</sub> H <sub>15</sub> N <sub>3</sub> O        | FW                      | 393.4373                                  |
| Acquisition Time (sec) | 1.9268                                                  | Comments                | Dr.Abdelsattar Omar Sample: CINB-12A DMSO |
| Date Stamp             | 22 Dec 2014 14:18:24                                    | Date                    | 22 Dec 2014 14:18:24                      |
| File Name              | E:\AAA_Research\Spectra Reservoir\NMR_2014\1223\Dr.Omar | CIN-13A_22-12-2014\2014 | Frequency (MHz)                           |
| Nucleus                | $^1\text{H}$                                            | Number of Transients    | 16                                        |
| Owner                  | nmr                                                     | Points Count            | 32768                                     |
| SW (cycles) (Hz)       | 17006.80                                                | Solvent                 | DMSO-d <sub>6</sub>                       |
| Sweep Width (Hz)       | 17006.28                                                | Temperature (degree C)  | 25.000                                    |
|                        |                                                         | Pulse Sequence          | zg30                                      |
|                        |                                                         | Spectrum Offset (Hz)    | 5250.0283                                 |
|                        |                                                         | Receiver Gain           | 7.13                                      |
|                        |                                                         | Spectrum Type           | STANDARD                                  |

$^1\text{H}$  NMR (850 MHz, DMSO-*d*<sub>6</sub>)  $\delta$  ppm 10.52 (br. s., 1 H) 10.05 (br. s., 1 H) 8.19 (s, 1 H) 8.01 (d,  $J=7.78$  Hz, 1 H) 7.60 - 7.66 (m, 4 H) 7.50 - 7.58 (m, 3 H) 7.40 - 7.48 (m, 5 H) 7.34 - 7.39 (m, 1 H) 6.98 (s, 1 H) 6.93 (d,  $J=16.09$  Hz, 1 H)

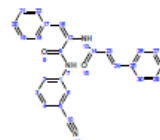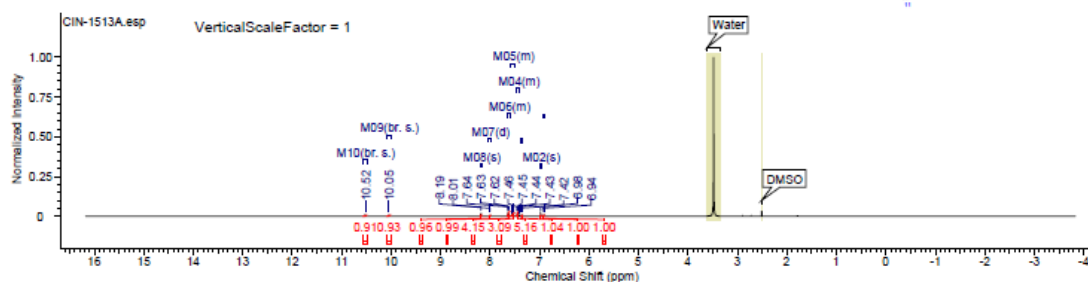



## Spectra of (1528)

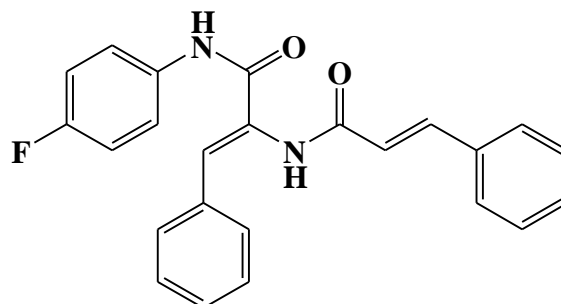

## FT-IR

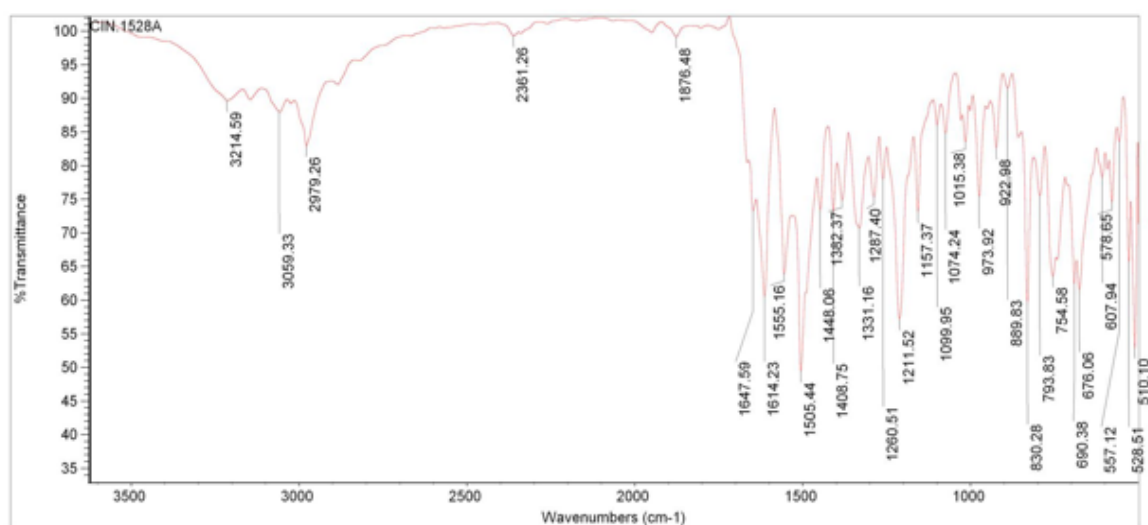

## LC/MS

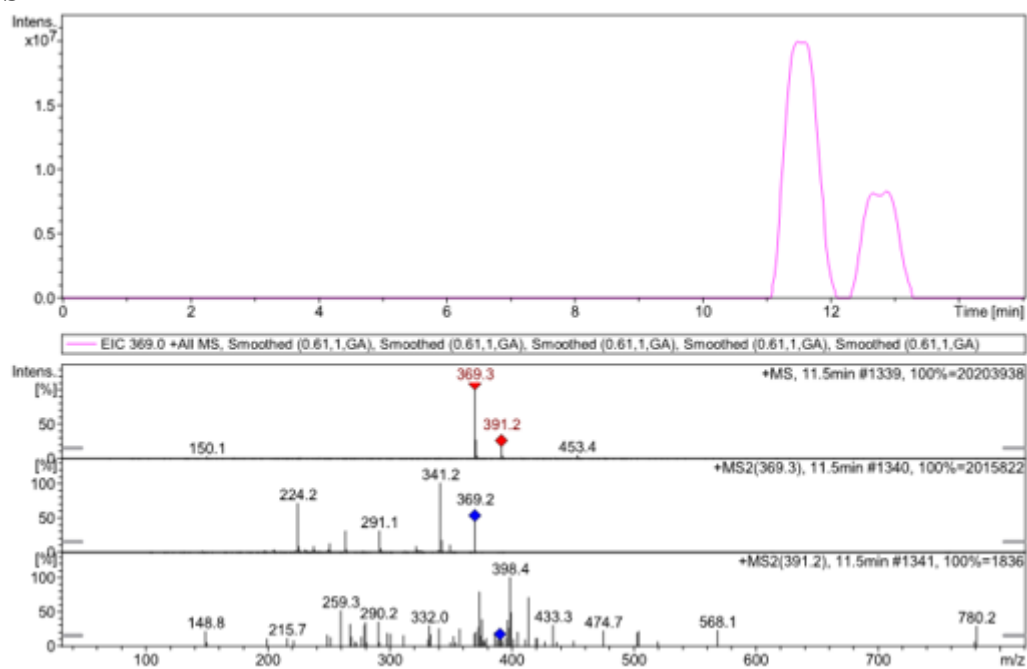

<sup>1</sup>H NMRThis report was created by ACD/NMR Processor Academic Edition. For more information go to [www.acdlabs.com/nmrproc/](http://www.acdlabs.com/nmrproc/)

1528

2018-10-01 8:02:14 AM

|                        |                                                                |                        |                                                         |
|------------------------|----------------------------------------------------------------|------------------------|---------------------------------------------------------|
| Formula                | C <sub>24</sub> H <sub>14</sub> FN <sub>5</sub> O <sub>2</sub> | FW                     | 386.4183                                                |
| Acquisition Time (sec) | 2.6564                                                         | Comment                | Dr A Mansour DMSO CIN-1528A                             |
| Date Stamp             | 09 Jun 2013 12:06:08                                           | Date                   | 09 Jun 2013 12:06:08                                    |
| File Name              | D:\AAA_Research\AAA_Original\CIN\NMR\CIN15series               | NMR                    | 20130707\CIN15series_1513to31_20130707\CIN-1528A\70.fid |
| Frequency (MHz)        | 600.13                                                         | Nucleus                | <sup>1</sup> H                                          |
| Original Points Count  | 32768                                                          | Owner                  | nmr                                                     |
| Receiver Gain          | 15.76                                                          | Points Count           | 32768                                                   |
| Spectrum Type          | STANDARD                                                       | SW(cyclical) (Hz)      | 12335.53                                                |
|                        |                                                                | Solvent                | DMSO-d <sub>6</sub>                                     |
|                        |                                                                | Temperature (degree C) | 25.008                                                  |
|                        |                                                                | Pulse Sequence         | zq30                                                    |
|                        |                                                                | Spectrum Offset (Hz)   | 3706.0483                                               |

<sup>1</sup>H NMR (600 MHz, DMSO-*d*<sub>6</sub>) δ ppm 6.91 (d, *J*=15.81 Hz, 1 H) 6.96 (s, 1 H) 7.13 - 7.20 (m, 3 H) 7.33 - 7.37 (m, 1 H) 7.39 - 7.48 (m, 8 H) 7.51 (d, *J*=15.81 Hz, 1 H) 7.62 (t, *J*=6.96 Hz, 5 H) 7.68 - 7.74 (m, 2 H) 9.92 (s, 1 H) 10.18 (s, 1 H)

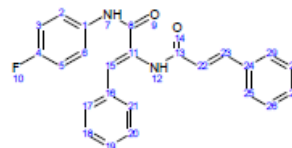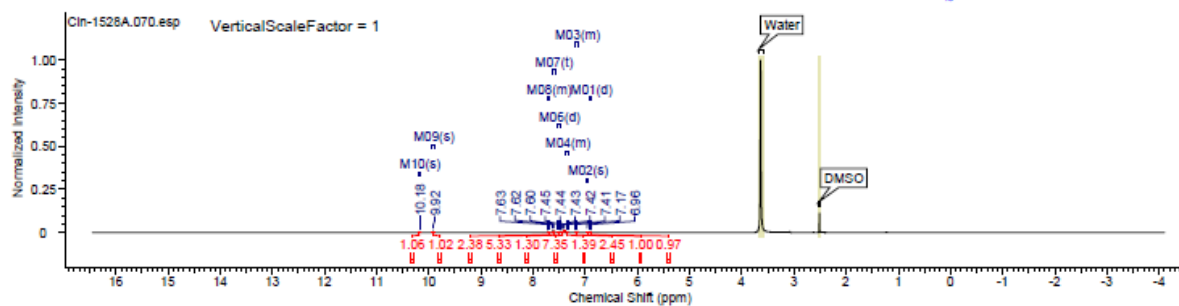

Spectra of (1530)

# Supplementary Information

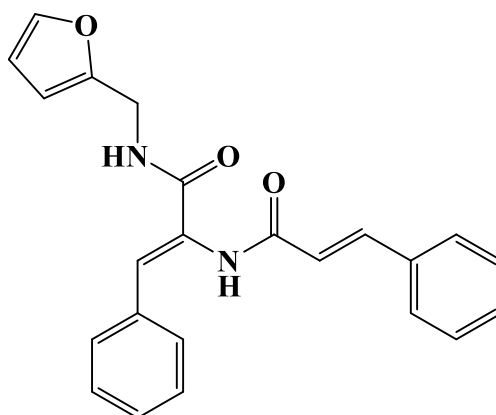

## LC/MS

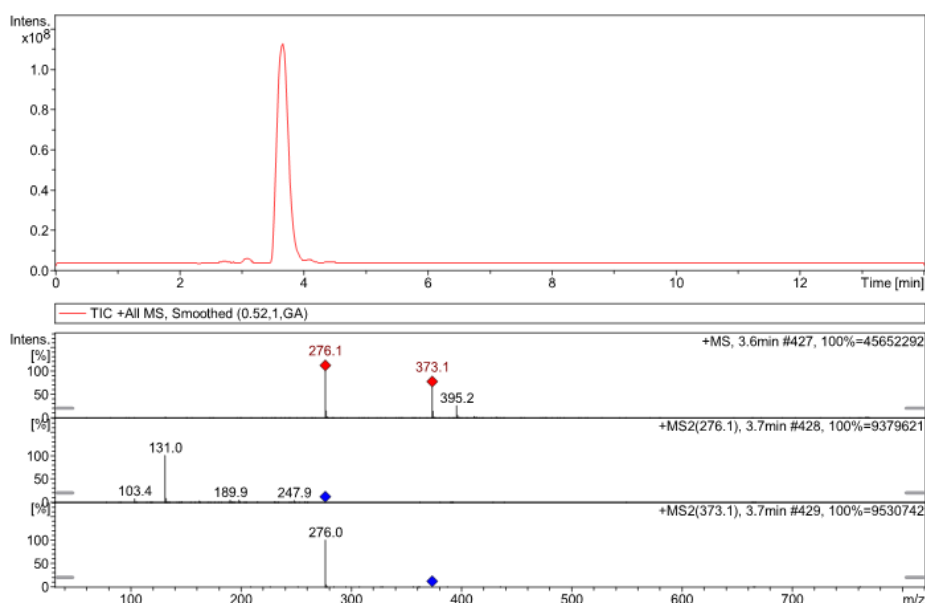

## <sup>1</sup>H NMR

### Cin-1530A

1/29/2015 10:48:51

|                        |                                                                                    |                  |                           |                        |                      |
|------------------------|------------------------------------------------------------------------------------|------------------|---------------------------|------------------------|----------------------|
| Acquisition Time (sec) | 2.8564                                                                             | Comment          | Dr Mansour DMSO CIN-1530A | Date                   | 07 Jul 2013 14:16:16 |
| Date Stamp             | 07 Jul 2013 14:16:16                                                               |                  |                           |                        |                      |
| File Name              | D:\AAA_Research\AAA_Ongoing\CIN\NMR\CIN15Series_1513to31_20130707\CIN-1530A\80.fid |                  |                           |                        |                      |
| Frequency (MHz)        | 600.13                                                                             | Nucleus          | <sup>1</sup> H            | Number of Transients   | 16                   |
| Original Points Count  | 32768                                                                              | Owner            | nmr                       | Points Count           | 32768                |
| Receiver Gain          | 34.94                                                                              | SW (cycles/s)    | 12335.53                  | Solvent                | DMSO-d6              |
| Spectrum Type          | STANDARD                                                                           | Sweep Width (Hz) | 12335.15                  | Temperature (degree C) | 25.002               |
|                        |                                                                                    |                  |                           | Spectrum Offset (Hz)   | 3708.0493            |

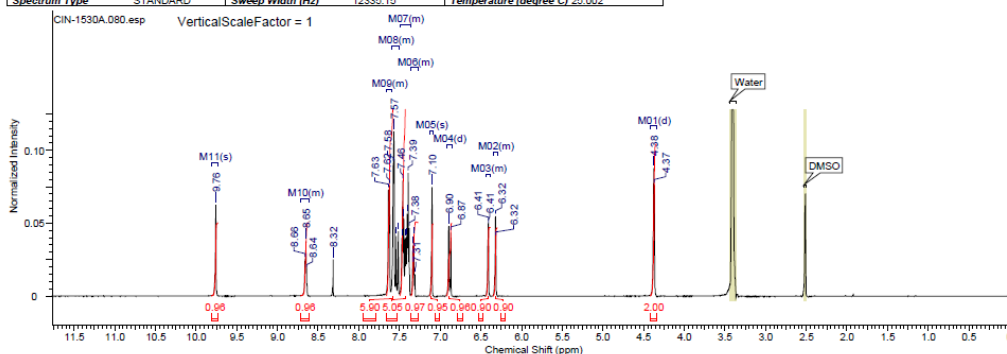

| No. | (ppm) | (Hz)   | Height |
|-----|-------|--------|--------|-----|-------|--------|--------|-----|-------|--------|--------|-----|-------|--------|--------|-----|-------|--------|--------|
| 1   | 4.37  | 2620.9 | 0.0761 | 9   | 6.87  | 4122.6 | 0.0436 | 17  | 7.38  | 4429.4 | 0.0485 | 25  | 7.51  | 4510.0 | 0.0444 | 33  | 8.32  | 4991.8 | 0.0249 |
| 2   | 4.38  | 2626.6 | 0.0877 | 10  | 6.90  | 4138.4 | 0.0481 | 18  | 7.39  | 4437.3 | 0.0848 | 26  | 7.54  | 4525.8 | 0.0412 | 34  | 8.64  | 5188.4 | 0.0177 |
| 3   | 6.32  | 3760.6 | 0.0401 | 11  | 7.10  | 4262.3 | 0.0748 | 19  | 7.41  | 4444.8 | 0.0565 | 27  | 7.57  | 4542.3 | 0.1130 | 35  | 8.65  | 5192.1 | 0.0376 |
| 4   | 6.32  | 3762.8 | 0.0547 | 12  | 7.31  | 4387.6 | 0.0148 | 20  | 7.42  | 4452.4 | 0.0408 | 28  | 7.57  | 4543.1 | 0.1103 | 36  | 8.66  | 5197.7 | 0.0252 |
| 5   | 6.32  | 3763.6 | 0.0547 | 13  | 7.31  | 4388.7 | 0.0195 | 21  | 7.43  | 4459.9 | 0.0399 | 29  | 7.58  | 4547.6 | 0.0913 | 37  | 8.76  | 5856.5 | 0.0626 |
| 6   | 6.41  | 3846.5 | 0.0484 | 14  | 7.32  | 4395.1 | 0.0414 | 22  | 7.45  | 4469.7 | 0.0533 | 30  | 7.62  | 4574.7 | 0.0756 |     |       |        |        |
| 7   | 6.41  | 3848.7 | 0.0502 | 15  | 7.34  | 4402.3 | 0.0348 | 23  | 7.46  | 4477.5 | 0.0790 | 31  | 7.63  | 4581.9 | 0.0728 |     |       |        |        |
| 8   | 6.41  | 3848.5 | 0.0466 | 16  | 7.34  | 4403.4 | 0.0308 | 24  | 7.47  | 4484.0 | 0.0399 | 32  | 7.64  | 4582.6 | 0.0726 |     |       |        |        |

## Spectra of (1531)

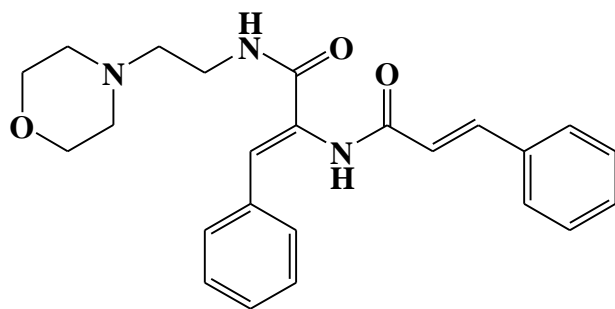

### LC/MS

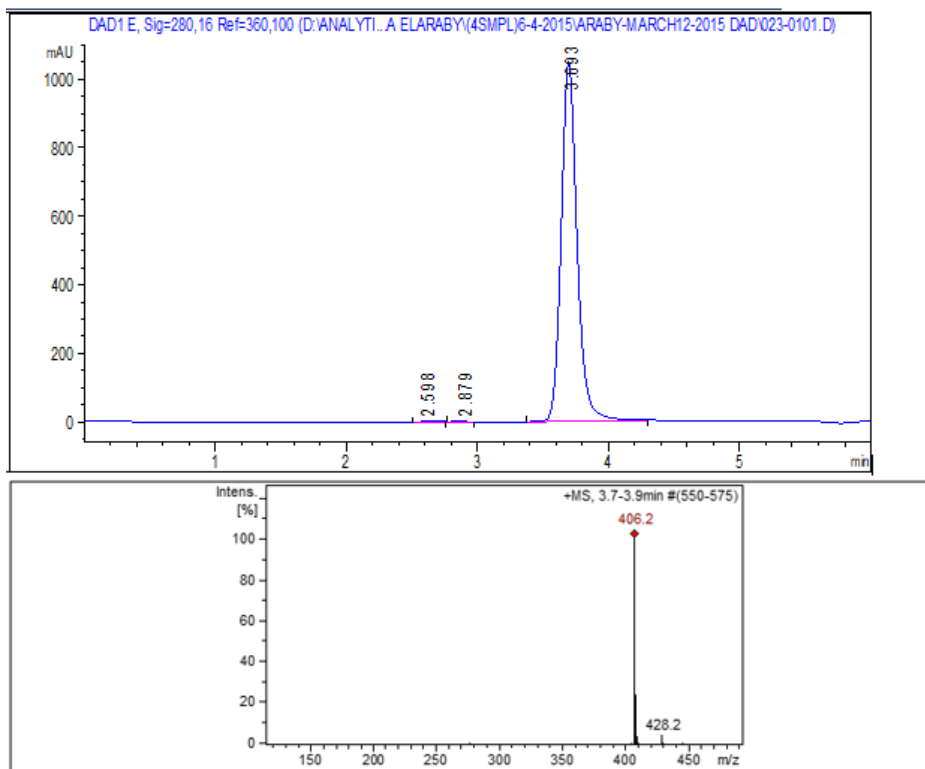

### <sup>1</sup>H NMR

# Supplementary Information

This report was created by ACD/NMR Processor Academic Edition. For more information go to [www.acdlabs.com/nmrproc/](http://www.acdlabs.com/nmrproc/)

## Cin-1531A

4/6/2015 02:51:29

|                        |                      |                        |                             |                      |                                                                |
|------------------------|----------------------|------------------------|-----------------------------|----------------------|----------------------------------------------------------------|
| Acquisition Time (sec) | 2.6564               | Comment                | Dr A Mansour DMSO RAKAN S1A | Date                 | 25 Feb 2015 14:29:04                                           |
| Date Stamp             | 25 Feb 2015 14:29:04 |                        |                             | File Name            | E:\Google Drive\Projects\CIN-Extension\Spectra\RAKAN S1A\11f1d |
| Frequency (MHz)        | 600.13               | Nucleus                | <sup>1</sup> H              | Number of Transients | 16                                                             |
| Original Points Count  | 52768                | Owner                  | nmr                         | Points Count         | 52768                                                          |
| Receiver Gain          | 99.00                | SW (cycle/sec)         | 12335.63                    | Pulse Sequence       | zg30                                                           |
| Spectrum Type          | STANDARD             | Sweep Width (Hz)       | 12335.15                    | Solvent              | DMSO-d6                                                        |
|                        |                      | Temperature (degree C) | 25.021                      | Spectrum Offset (Hz) | 3706.0500                                                      |

<sup>1</sup>H NMR (600 MHz, DMSO-d<sub>6</sub>)  $\delta$  ppm 2.37 - 2.47 (m, 6 H) 3.25 - 3.32 (m, 2 H) 3.52 - 3.61 (m, 4 H) 6.88 (d,  $J$ =16.19 Hz, 1 H) 7.07 (s, 1 H) 7.29 - 7.36 (m, 1 H) 7.37 - 7.50 (m, 5 H) 7.53 (d,  $J$ =15.81 Hz, 1 H) 7.56 (d,  $J$ =7.53 Hz, 2 H) 7.63 (d,  $J$ =7.15 Hz, 2 H) 7.96 (br. s., 1 H) 9.74 (s, 1 H)

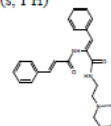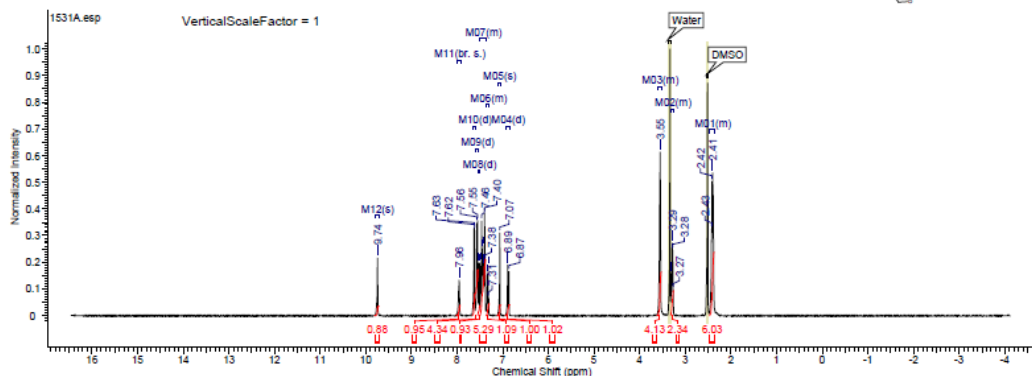

## Spectra of (1532)

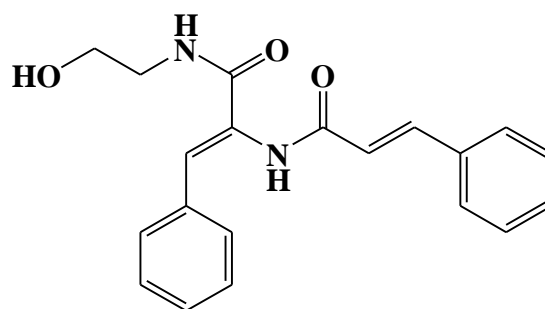

LC/MS

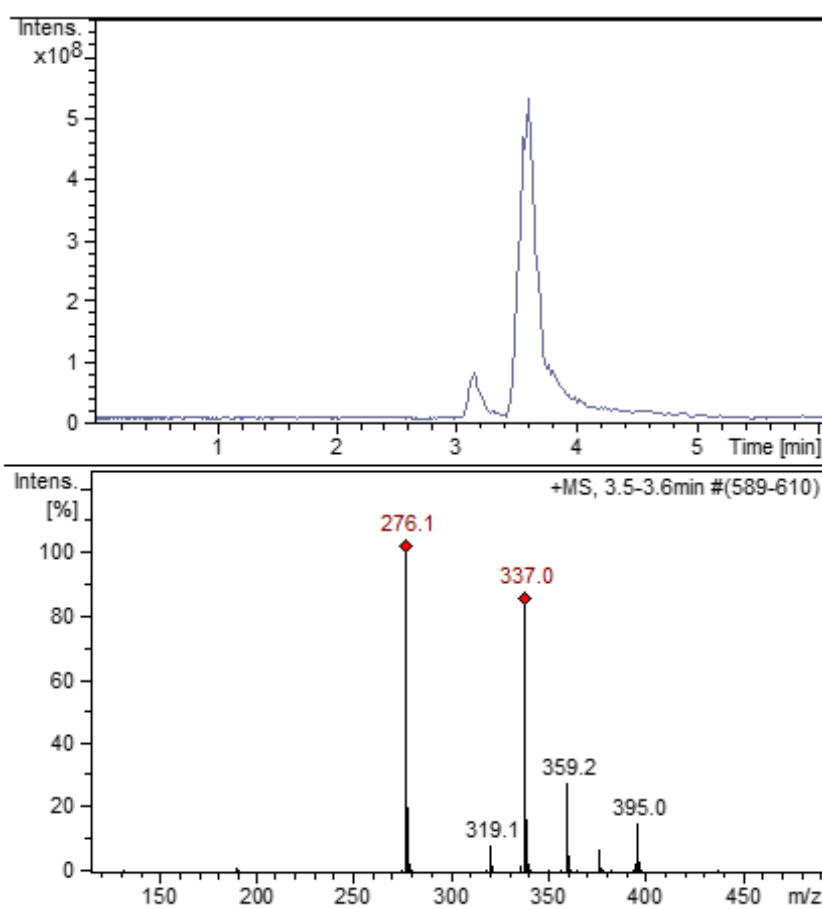

<sup>1</sup>H NMR

This report was created by ACD/NMR Processor Academic Edition. For more information go to [www.acdlabs.com/nmrproc/](http://www.acdlabs.com/nmrproc/)

## Cin-1532A

4/7/2015 05:03:02

|                        |                      |                   |                               |                                                                 |         |                      |           |
|------------------------|----------------------|-------------------|-------------------------------|-----------------------------------------------------------------|---------|----------------------|-----------|
| Acquisition Time (sec) | 2.6564               | Comment           | Dr.A.Mansour DMSO RAKAN 1532A |                                                                 | Date    | 25 Feb 2015 14:41:52 |           |
| Date Stamp             | 25 Feb 2015 14:41:52 |                   | File Name                     | E:\Google Drive\Projects\CIN-Extension\Spectra\RAKAN 1532A\11fd |         |                      |           |
| Frequency (MHz)        | 600.13               | Nucleus           | <sup>1</sup> H                | Number of Transients                                            | 16      | Origin               | spect     |
| Original Points Count  | 32768                | Owner             | nmr                           | Points Count                                                    | 32768   | Pulse Sequence       | zg30      |
| Receiver Gain          | 34.94                | SW(cyclical) (Hz) | 12335.53                      | Solvent                                                         | DMSO-d6 | Spectrum Offset (Hz) | 3706.0500 |
| Spectrum Type          | STANDARD             | Sweep Width (Hz)  | 12335.15                      | Temperature (degree C)                                          | 25.000  |                      |           |

<sup>1</sup>H NMR (600 MHz, DMSO-*d*<sub>6</sub>)  $\delta$  ppm 2.58 (t, *J*=5.65 Hz, 1 H) 3.26 (q, *J*=6.02 Hz, 2 H) 3.36 (t, *J*=5.83 Hz, 2 H) 3.48 (t, *J*=6.21 Hz, 2 H) 6.89 (d, *J*=15.81 Hz, 1 H) 7.07 (s, 1 H) 7.32 (d, *J*=7.53 Hz, 1 H) 7.39 (t, *J*=7.53 Hz, 2 H) 7.43 (d, *J*=7.15 Hz, 1 H) 7.44 - 7.48 (m, 1 H) 7.52 (d, *J*=15.81 Hz, 1 H) 7.56 (d, *J*=7.91 Hz, 1 H) 7.63 (d, *J*=7.53 Hz, 1 H) 8.10 (s, 1 H)

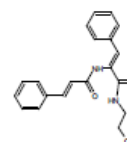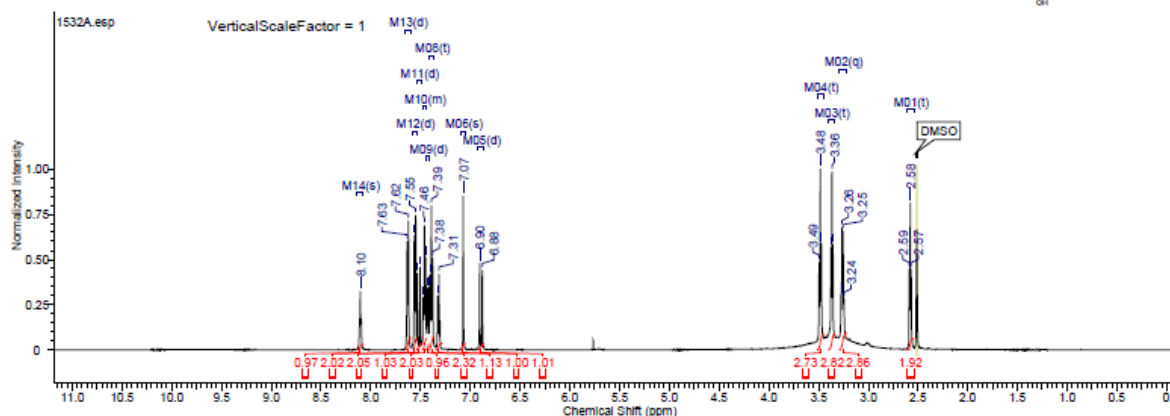

Spectra of (1535)

# Supplementary Information

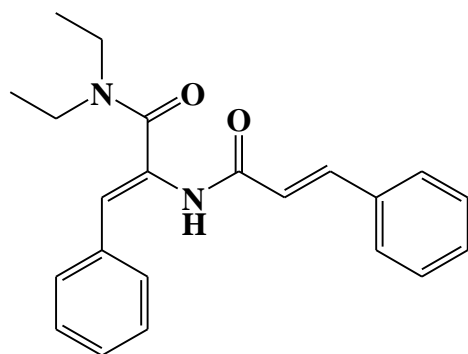

## $^1\text{H}$ NMR

This report was created by ACD/NMR Processor Academic Edition. For more information go to [www.acdlabs.com/nmrproc/](http://www.acdlabs.com/nmrproc/)

### Cin-1535A

4/7/2015 05:00:33

|                        |                      |                        |                                                                  |                      |                      |
|------------------------|----------------------|------------------------|------------------------------------------------------------------|----------------------|----------------------|
| Acquisition Time (sec) | 2.6564               | Comment                | Dr.A.Mansour DMSO RAKAN 1535A                                    | Date                 | 25 Feb 2015 14:20:32 |
| Date Stamp             | 25 Feb 2015 14:20:32 | File Name              | E:\Google Drive\Projects\CIN-Extension\Spectra\RAKAN\1535A\1.fid | Origin               | spect                |
| Frequency (MHz)        | 600.13               | Nucleus                | $^1\text{H}$                                                     | Number of Transients | 15                   |
| Original Points Count  | 32758                | Owner                  | nmr                                                              | Points Count         | 32758                |
| Receiver Gain          | 37.66                | SW (cycles) (Hz)       | 12335.53                                                         | Pulse Sequence       | zgpg                 |
| Spectrum Type          | STANDARD             | Sweep Width (Hz)       | 12335.15                                                         | Solvent              | DMSO-d6              |
|                        |                      | Temperature (degree C) | 24.993                                                           | Spectrum Offset (Hz) | 3766.0493            |

$^1\text{H}$  NMR (600 MHz, DMSO- $d_6$ )  $\delta$  ppm 1.14 (br. s., 6 H) 3.26 - 3.43 (m, 3 H) 6.10 (br. s., 1 H) 6.89 - 6.98 (m, 1 H) 7.27 - 7.35 (m, 1 H) 7.36 - 7.49 (m, 5 H) 7.52 - 7.59 (m, 3 H) 7.60 (d,  $J=7.15$  Hz, 2 H) 9.98 (br. s., 1 H)

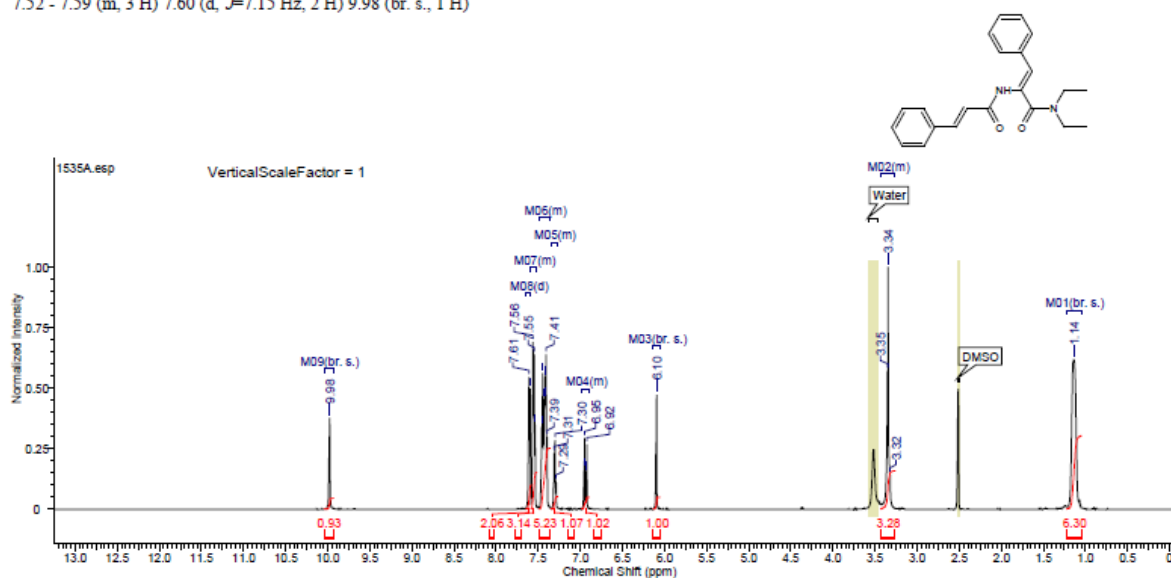

## Spectra of (1536)



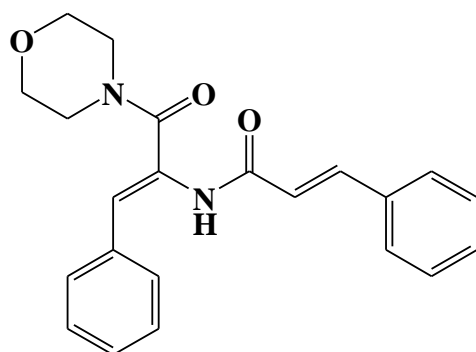**<sup>1</sup>H NMR**

This report was created by ACD/NMR Processor Academic Edition. For more information go to [www.acdlabs.com/nmrproc/](http://www.acdlabs.com/nmrproc/)

**Cin-1536A**

4/7/2015 05:06:29

|                        |                      |                  |                                                                        |                        |                      |
|------------------------|----------------------|------------------|------------------------------------------------------------------------|------------------------|----------------------|
| Acquisition Time (sec) | 2.6564               | Comment          | Dr.A.Mansour DMSO RAKAN 1536A                                          | Date                   | 25 Feb 2015 14:22:40 |
| Date Stamp             | 25 Feb 2015 14:22:40 | File Name        | E:\Google Drive\Projects\CIN-Extension\Spectra\RAKAN\RAKAN 1536A\1.fid | Origin                 | spect                |
| Frequency (MHz)        | 600.13               | Nucleus          | <sup>1</sup> H                                                         | Number of Transients   | 16                   |
| Original Points Count  | 32768                | Owner            | nmr                                                                    | Points Count           | 32768                |
| Receiver Gain          | 37.66                | SW (cycles/s)    | 12335.53                                                               | Solvent                | DMSO-d6              |
| Spectrum Type          | STANDARD             | Sweep Width (Hz) | 12335.15                                                               | Temperature (degree C) | 25.000               |
|                        |                      |                  |                                                                        | Spectrum Offset (Hz)   | 3706.0500            |

<sup>1</sup>H NMR (600 MHz, DMSO-d<sub>6</sub>) δ ppm 3.35 (br. s., 1 H) 3.53 (br. s., 3 H) 6.19 (s, 1 H) 6.93 (d, J=15.81 Hz, 1 H) 7.27 - 7.36 (m, 2 H) 7.40 - 7.48 (m, 6 H) 7.56 - 7.63 (m, 6 H) 10.07 (s, 1 H)

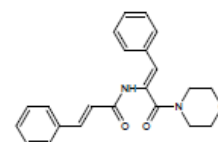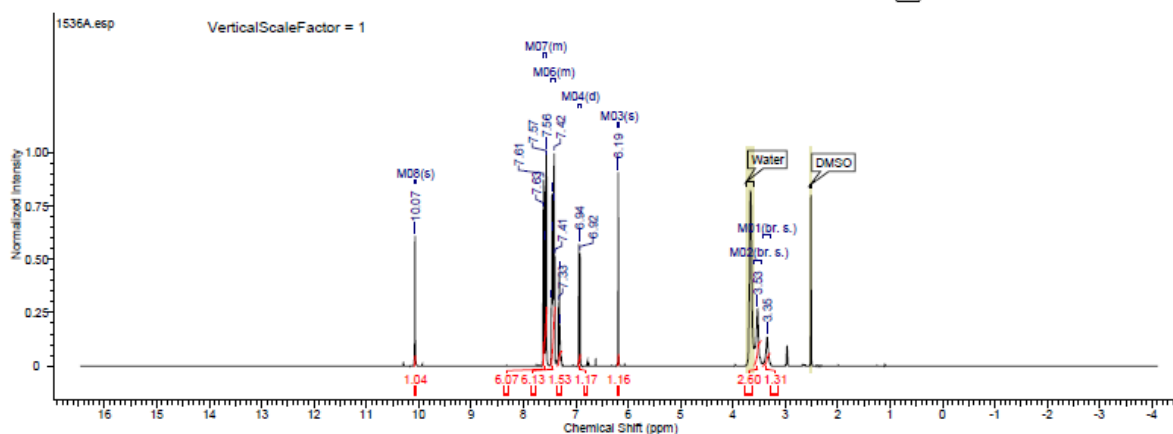

Spectra of (1555)

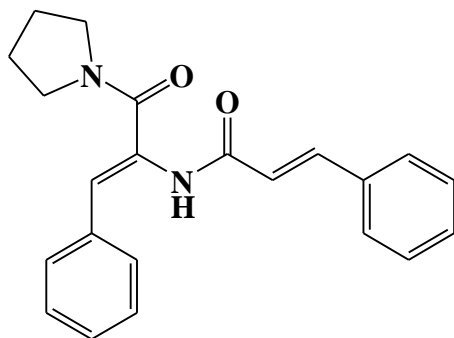<sup>1</sup>H NMR

This report was created by ACD/NMR Processor Academic Edition. For more information go to [www.acdlabs.com/nmrproc/](http://www.acdlabs.com/nmrproc/)

## Cin-1555A

4/7/2015 06:09:42

|                        |                      |                   |                               |                                                                  |         |                      |           |
|------------------------|----------------------|-------------------|-------------------------------|------------------------------------------------------------------|---------|----------------------|-----------|
| Acquisition Time (sec) | 2.6564               | Comment           | Dr.A.Mansour DMSO RAKAN 1555A |                                                                  | Date    | 25 Feb 2015 14:58:56 |           |
| Date Stamp             | 25 Feb 2015 14:58:56 |                   | File Name                     | E:\Google Drive\Projects\CIN-Extension\Spectra\RAKAN 1555A\11fid |         |                      |           |
| Frequency (MHz)        | 600.13               | Nucleus           | <sup>1</sup> H                | Number of Transients                                             | 16      | Origin               | spect     |
| Original Points Count  | 32768                | Owner             | nmr                           | Points Count                                                     | 32768   | Pulse Sequence       | zg30      |
| Receiver Gain          | 87.48                | SW(cyclical) (Hz) | 12335.53                      | Solvent                                                          | DMSO-d6 | Spectrum Offset (Hz) | 3706.0500 |
| Spectrum Type          | STANDARD             | Sweep Width (Hz)  | 12335.15                      | Temperature (degree C)                                           | 24.992  |                      |           |

<sup>1</sup>H NMR (600 MHz, DMSO-*d*<sub>6</sub>) δ ppm 1.83 - 1.87 (m, 18 H) 3.32 (br. s., 1 H) 3.37 (t, *J*=6.59 Hz, 9 H) 3.58 (t, *J*=6.02 Hz, 8 H) 6.32 (s, 4 H) 6.90 (s, 2 H) 6.92 (s, 2 H) 7.28 - 7.33 (m, 6 H) 7.40 - 7.47 (m, 24 H) 7.54 (s, 2 H) 7.56 - 7.58 (m, 11 H) 7.61 (d, *J*=6.78 Hz, 9 H) 10.00 (s, 3 H)

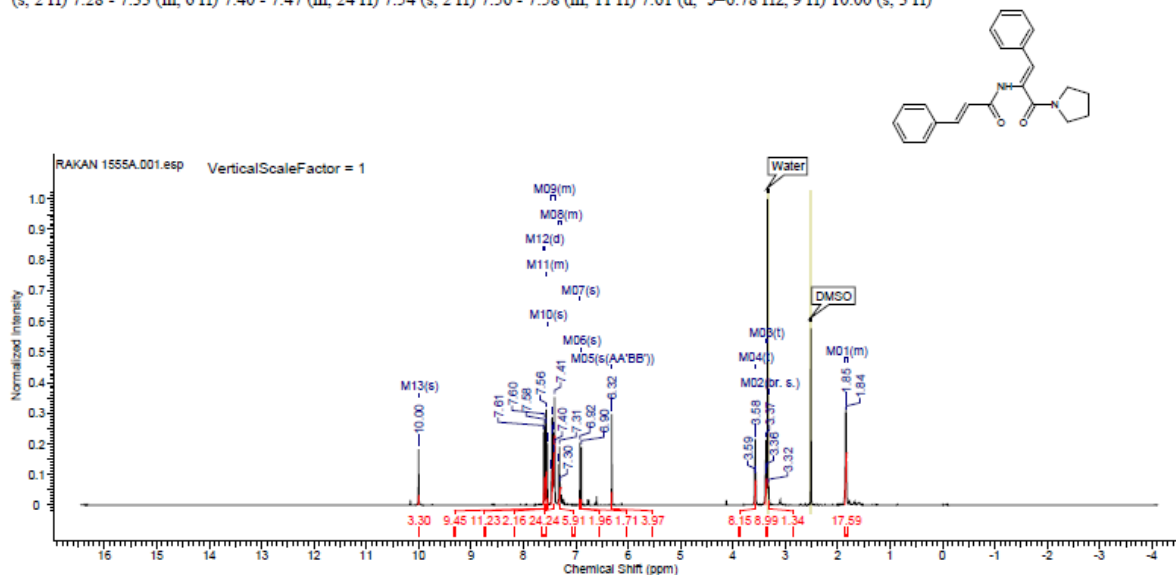

Spectra of (1556)

# Supplementary Information

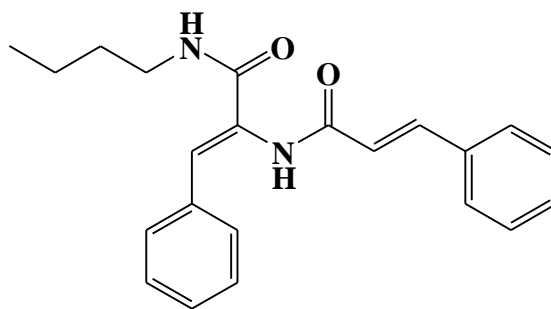

## <sup>1</sup>H NMR

This report was created by ACD/NMR Processor Academic Edition. For more information go to [www.acdlabs.com/nmrproc/](http://www.acdlabs.com/nmrproc/)

### Cin-1556A

4/7/2015 05:40:40

|                        |                      |                   |                               |                        |                                                                        |
|------------------------|----------------------|-------------------|-------------------------------|------------------------|------------------------------------------------------------------------|
| Acquisition Time (sec) | 2.6564               | Comment           | Dr.A.Mansour DMSO RAKAN 1556A | Date                   | 25 Feb 2015 14:33:20                                                   |
| Date Stamp             | 25 Feb 2015 14:33:20 |                   |                               | File Name              | E:\Google Drive\Projects\CIN-Extension\Spectra\RAKAN\RAKAN 1556A\1.fid |
| Frequency (MHz)        | 600.13               | Nucleus           | <sup>1</sup> H                | Number of Transients   | 16                                                                     |
| Original Points Count  | 32768                | Owner             | nmr                           | Points Count           | 32768                                                                  |
| Receiver Gain          | 43.27                | SW(cyclical) (Hz) | 12335.53                      | Pulse Sequence         | zg30                                                                   |
| Spectrum Type          | STANDARD             | Sweep Width (Hz)  | 12335.15                      | Solvent                | DMSO-d <sub>6</sub>                                                    |
|                        |                      |                   |                               | Spectrum Offset (Hz)   | 3706.0500                                                              |
|                        |                      |                   |                               | Temperature (degree C) | 24.996                                                                 |

<sup>1</sup>H NMR (600 MHz, DMSO-*d*<sub>6</sub>) δ ppm 0.90 (t, *J*=7.34 Hz, 3 H) 1.28 - 1.37 (m, 2 H) 1.43 - 1.51 (m, 2 H) 3.17 (q, *J*=6.78 Hz, 2 H) 6.88 (d, *J*=16.19 Hz, 1 H) 7.01 (s, 1 H) 7.31 (t, *J*=7.34 Hz, 1 H) 7.36 - 7.44 (m, 3 H) 7.44 - 7.48 (m, 2 H) 7.51 (d, *J*=15.81 Hz, 1 H) 7.56 (d, *J*=7.53 Hz, 2 H) 7.62 (d, *J*=7.15 Hz, 2 H) 8.10 (t, *J*=5.83 Hz, 1 H) 9.69 (s, 1 H)

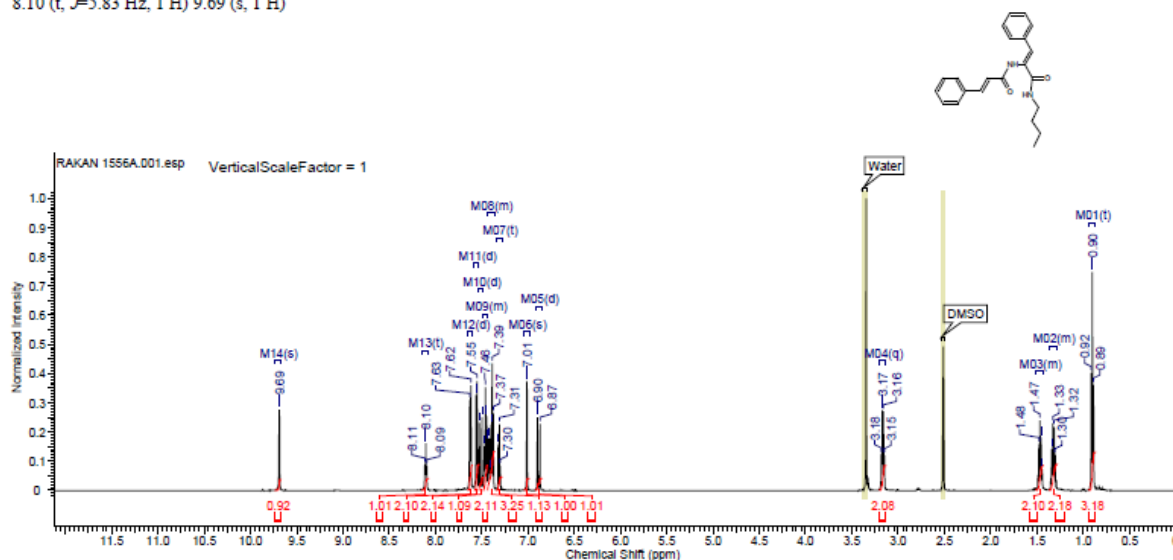

Spectra of (1557)

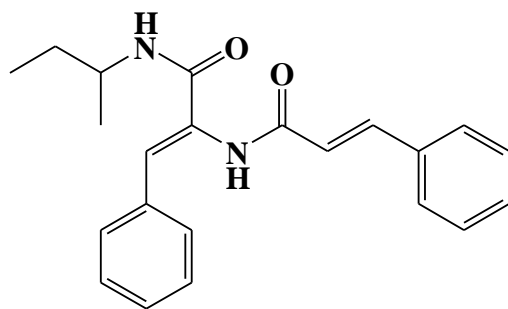<sup>1</sup>H NMR

This report was created by ACD/NMR Processor Academic Edition. For more information go to [www.acdlabs.com/nmrproc/](http://www.acdlabs.com/nmrproc/)

## Cin-1557A

4/7/2015 05:47:10

|                        |                      |                        |                               |                                                                   |                      |
|------------------------|----------------------|------------------------|-------------------------------|-------------------------------------------------------------------|----------------------|
| Acquisition Time (sec) | 2.6564               | Comment                | Dr.A.Mansour DMSO RAKAN 1557A | Date                                                              | 25 Feb 2015 15:03:12 |
| Date Stamp             | 25 Feb 2015 15:03:12 |                        | File Name                     | E:\Google Drive\Projects\CIN-Extension\Spectra\RAKAN 1557A\11.fid |                      |
| Frequency (MHz)        | 600.13               | Nucleus                | <sup>1</sup> H                | Number of Transients                                              | 16                   |
| Original Points Count  | 32768                | Owner                  | nmr                           | Points Count                                                      | 32768                |
| Receiver Gain          | 83.44                | SW(cyclical) (Hz)      | 12335.53                      | Pulse Sequence                                                    | zg30                 |
| Spectrum Type          | STANDARD             | Sweep Width (Hz)       | 12335.15                      | Solvent                                                           | DMSO-d <sub>6</sub>  |
|                        |                      | Temperature (degree C) | 24.996                        | Spectrum Offset (Hz)                                              | 3706.0500            |

<sup>1</sup>H NMR (600 MHz, DMSO-d<sub>6</sub>) δ ppm 0.84 - 0.93 (m, 3 H) 1.11 (d, *J*=6.78 Hz, 3 H) 1.39 - 1.59 (m, 2 H) 3.81 (dt, *J*=13.93, 7.34 Hz, 1 H) 6.86 - 6.94 (m, 2 H) 7.28 - 7.34 (m, 1 H) 7.39 (t, *J*=7.72 Hz, 2 H) 7.41 - 7.49 (m, 3 H) 7.52 (d, *J*=15.81 Hz, 1 H) 7.56 (d, *J*=7.91 Hz, 2 H) 7.62 (d, *J*=7.15 Hz, 2 H) 7.84 (d, *J*=8.66 Hz, 1 H) 9.66 (s, 1 H)

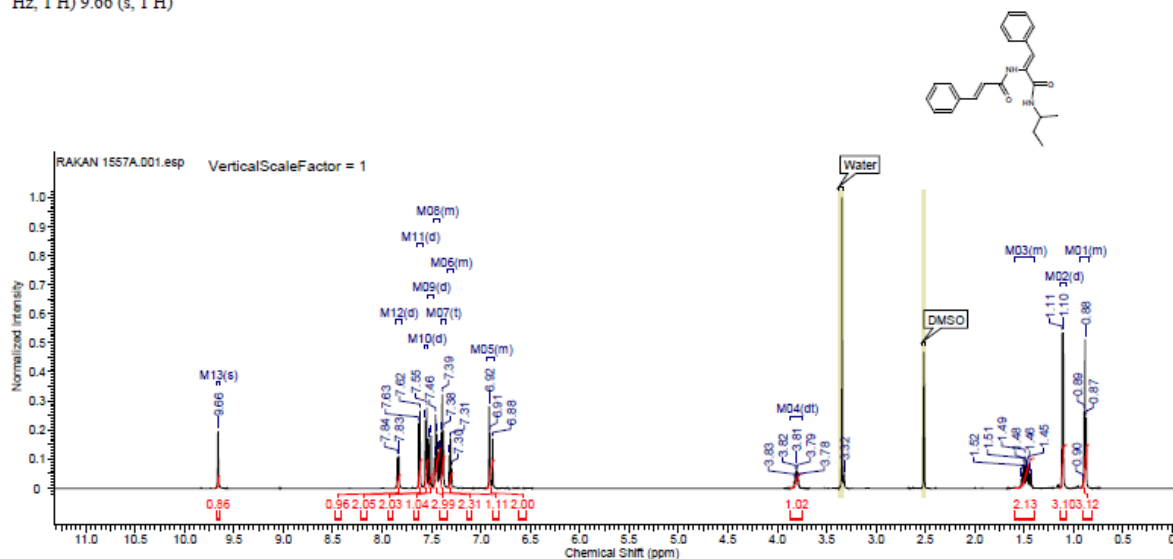

Spectra of (1559)

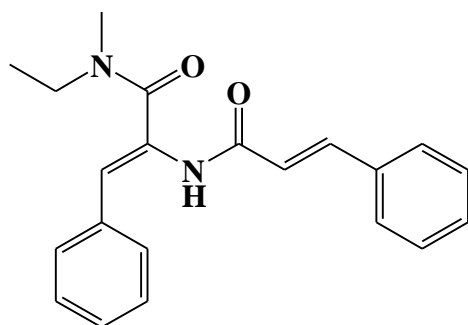**<sup>1</sup>H NMR**

This report was created by ACD/NMR Processor Academic Edition. For more information go to [www.acdlabs.com/nmrproc/](http://www.acdlabs.com/nmrproc/)

**CIN-1559A-4m**

1/6/2017 05:28:08 PM

|                        |                                                                                                                                        |                  |                               |                        |                      |
|------------------------|----------------------------------------------------------------------------------------------------------------------------------------|------------------|-------------------------------|------------------------|----------------------|
| Acquisition Time (sec) | 2.6564                                                                                                                                 | Comment          | Dr.A.Mansour DMSO RAKAN 1559A | Date                   | 25 Feb 2015 14:50:24 |
| Date Stamp             | 25 Feb 2015 14:50:24                                                                                                                   |                  |                               |                        |                      |
| File Name              | E:\Google Drive\Projects\CIN\Safe-Cinnamamide\Spectra Bis-Cinnamamide\1H NMR\SecondBatch-Table41-41\ConfirmedCpdsNMR\RAKAN 1559A\1.fid |                  |                               |                        |                      |
| Frequency (MHz)        | 600.13                                                                                                                                 | Nucleus          | <sup>1</sup> H                | Number of Transients   | 16                   |
| Original Points Count  | 32768                                                                                                                                  | Owner            | nmr                           | Points Count           | 32768                |
| Receiver Gain          | 30.24                                                                                                                                  | SW (cycles) (Hz) | 12335.53                      | Solvent                | DMSO-d6              |
| Spectrum Type          | STANDARD                                                                                                                               | Sweep Width (Hz) | 12335.15                      | Temperature (degree C) | 24.997               |
|                        |                                                                                                                                        |                  |                               | Pulse Sequence         | zg30                 |
|                        |                                                                                                                                        |                  |                               | Spectrum Offset (Hz)   | 3706.0500            |

<sup>1</sup>H NMR (DMSO-*d*<sub>6</sub>) δ ppm 10.01 (br. s., 1 H), 7.61 (d, *J*=7.15 Hz, 2 H), 7.52 - 7.59 (m, 3 H), 7.37 - 7.49 (m, 5 H), 7.27 - 7.34 (m, 1 H), 6.94 (d, *J*=15.81 Hz, 1 H), 6.09 - 6.20 (m, 1 H), 3.55 (br. s., 1 H), 3.08 (br. s., 1 H), 2.85 (br. s., 1 H), 1.17 (br. s., 1 H), 1.12 (br. s., 2 H)

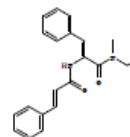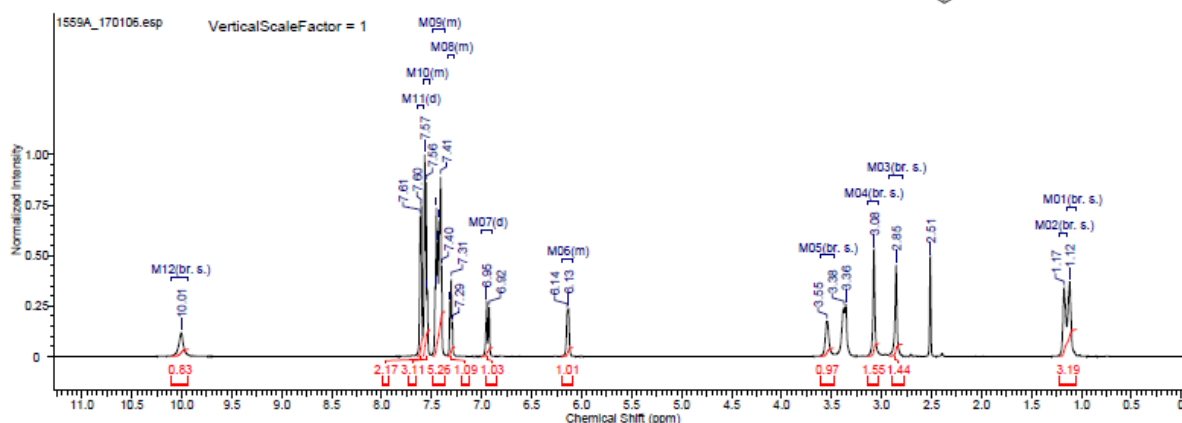**Spectra of (15EE)<sup>5</sup>**

# Supplementary Information

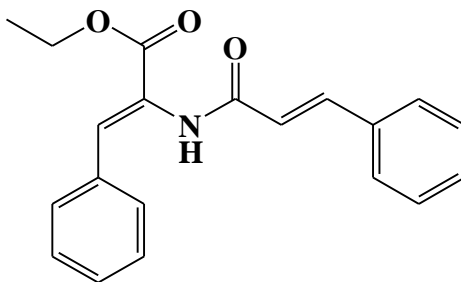

## <sup>1</sup>H NMR

### CIN-15EE, 5

12/17/2016 07:09:34 PM

|                        |                                                          |                                                            |                                          |                        |                      |
|------------------------|----------------------------------------------------------|------------------------------------------------------------|------------------------------------------|------------------------|----------------------|
| Acquisition Time (sec) | 2.6564                                                   | Comment                                                    | Dr A.Mansour Acetone Cin-1522B 27-3-2012 | Date                   | 27 Mar 2013 13:46:24 |
| Date Stamp             | 27 Mar 2013 13:46:24                                     |                                                            |                                          |                        |                      |
| File Name              | E:\AAA_Research\AAA_Ongoing\GINN\Spectra\NMR\CIN15Series | NMR_20130707\CIN15Series_1513to31_20130707\Cin-1522B11.fid |                                          |                        |                      |
| Frequency (MHz)        | 600.13                                                   | Nucleus                                                    | <sup>1</sup> H                           | Number of Transients   | 16                   |
| Original Points Count  | 32788                                                    | Owner                                                      | nmr                                      | Points Count           | 32788                |
| Receiver Gain          | 106.17                                                   | SW(cyclical) (Hz)                                          | 12335.53                                 | Solvent                | Acetone              |
| Spectrum Type          | STANDARD                                                 | Sweep Width (Hz)                                           | 12335.15                                 | Temperature (degree C) | 25.009               |
|                        |                                                          |                                                            |                                          | Pulse Sequence         | zgpg30               |
|                        |                                                          |                                                            |                                          | Spectrum Offset (Hz)   | 3706.0493            |

<sup>1</sup>H NMR (Acetone)  $\delta$  ppm 8.97 (br. s., 1 H), 7.62 - 7.69 (m, 5 H), 7.34 - 7.50 (m, 6 H), 7.30 (s, 1 H), 6.99 (d,  $J=15.81$  Hz, 1 H), 4.27 (q,  $J=7.03$  Hz, 2 H), 1.31 (t,  $J=7.15$  Hz, 3 H)

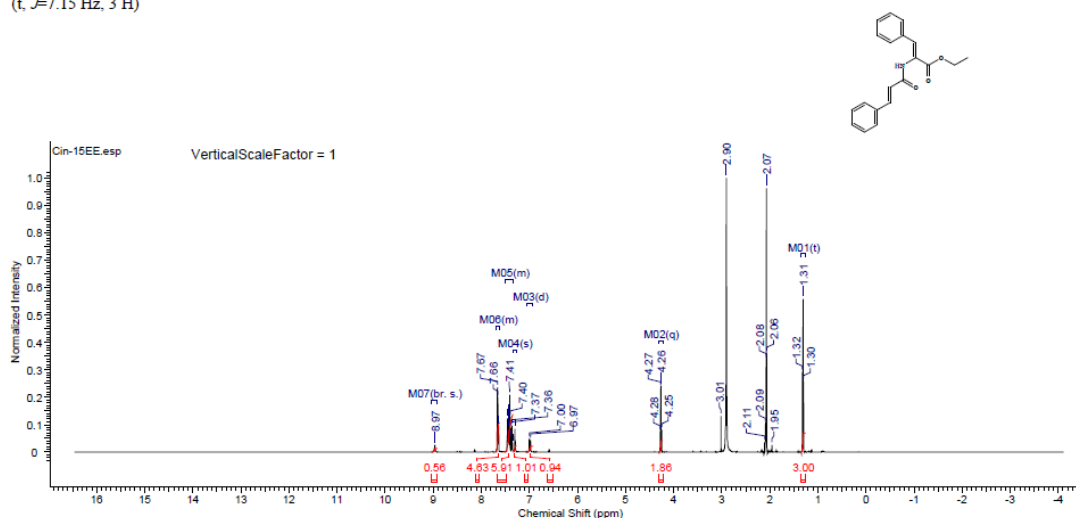

## <sup>13</sup>C NMR

This report was created by ACD/NMR Processor Academic Edition. For more information go to [www.acdlabs.com/nmrproc/](http://www.acdlabs.com/nmrproc/)

### CIN-15EE

11/20/2014 01:27:01

|                        |                                                                      |                   |                              |                        |                      |
|------------------------|----------------------------------------------------------------------|-------------------|------------------------------|------------------------|----------------------|
| Acquisition Time (sec) | 0.4719                                                               | Comment           | Dr.Mansour CDC13 CIN15EE C13 | Date                   | 14 Nov 2014 07:24:32 |
| Date Stamp             | 14 Nov 2014 07:24:32                                                 |                   |                              |                        |                      |
| File Name              | E:\AAA_Research\Spectra\Reservoir\CIN_13C_20-11-14\CIN15EE C1311.fid |                   |                              |                        |                      |
| Frequency (MHz)        | 150.92                                                               | Nucleus           | <sup>13</sup> C              | Number of Transients   | 4096                 |
| Original Points Count  | 16384                                                                | Owner             | nmr                          | Points Count           | 16384                |
| Receiver Gain          | 173.48                                                               | SW(cyclical) (Hz) | 34722.22                     | Solvent                | CHLOROFORM-d         |
| Spectrum Offset (Hz)   | 16599.3105                                                           | Spectrum Type     | STANDARD                     | Sweep Width (Hz)       | 34720.10             |
|                        |                                                                      |                   |                              | Temperature (degree C) | 25.001               |

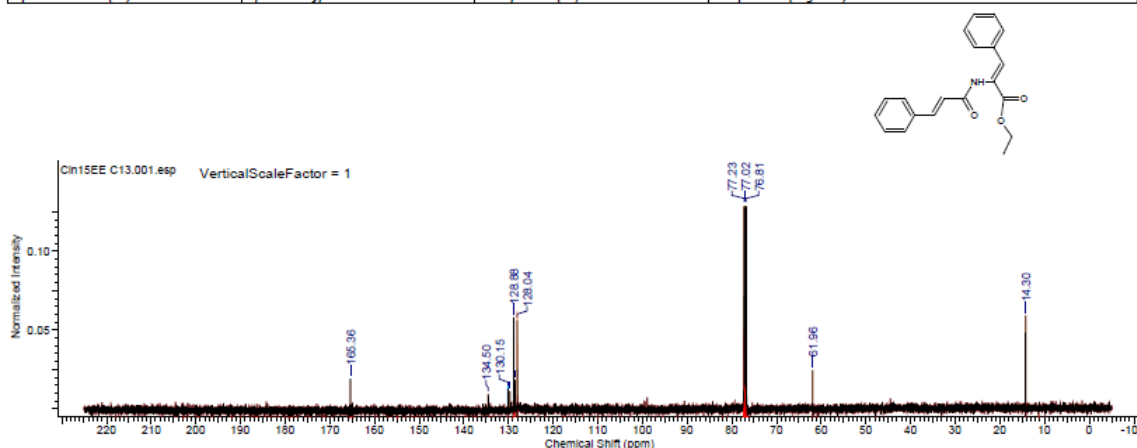

## Spectra of (1612)

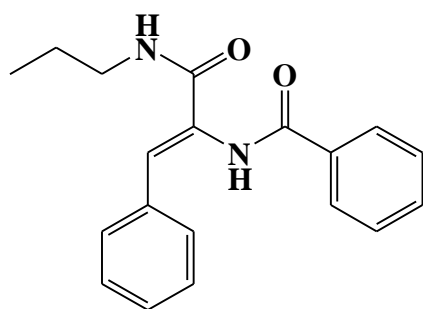

LC/MS

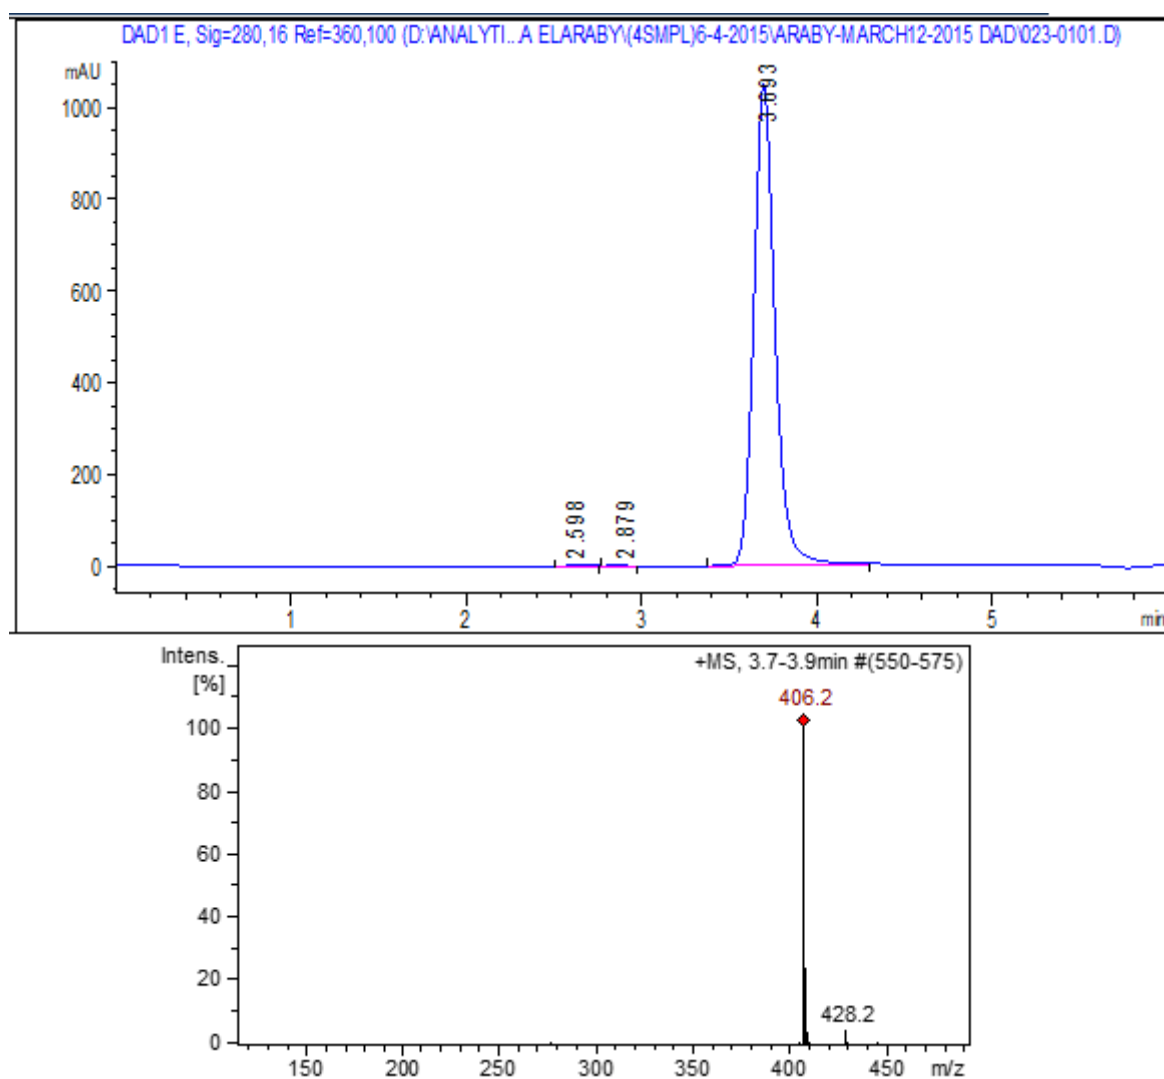

<sup>1</sup>H NMRThis report was created by ACD/NMR Processor Academic Edition. For more information go to [www.acdlabs.com/nmrproc/](http://www.acdlabs.com/nmrproc/)

1612

2018-10-06 5:34:48 PM

|                        |                                                                                                 |                        |                                            |
|------------------------|-------------------------------------------------------------------------------------------------|------------------------|--------------------------------------------|
| Formula                | C <sub>12</sub> H <sub>10</sub> N <sub>4</sub> O <sub>2</sub>                                   | FW                     | 308.3743                                   |
| Acquisition Time (sec) | 1.9268                                                                                          | Comment                | Dr.Mustafa El-Araby Sample : CIN-1612 DMSO |
| Date Stamp             | 08 Apr 2015 10:15:12                                                                            | Date                   | 08 Apr 2015 10:15:12                       |
| File Name              | E:\AAA_Research\Spectra Reservoir\April2015\Cin_1612_1712_1532\MUSTAFA CIN-1612_08-04-2015\201d | Frequency (MHz)        | 850.15                                     |
| Nucleus                | <sup>1</sup> H                                                                                  | Number of Transients   | 20                                         |
| Owner                  | nmr                                                                                             | Pois Count             | 32768                                      |
| SW (cyclical) (Hz)     | 17006.80                                                                                        | Pulse Sequence         | zg30                                       |
| Sweep Width (Hz)       | 17006.28                                                                                        | Solvent                | DMSO-d <sub>6</sub>                        |
|                        |                                                                                                 | Spectrum Offset (Hz)   | 5250.0283                                  |
|                        |                                                                                                 | Temperature (degree C) | 25.001                                     |
|                        |                                                                                                 | Receiver Gain          | 10.55                                      |
|                        |                                                                                                 | Spectrum Type          | STANDARD                                   |

<sup>1</sup>H NMR (850 MHz, DMSO-*d*<sub>6</sub>) δ ppm 7.82 - 7.92 (m, 2 H) 7.57 (d, *J*=8.30 Hz, 3 H) 7.50 (t, *J*=7.53 Hz, 2 H) 7.40 (d, *J*=8.30 Hz, 2 H) 7.22 - 7.32 (m, 3 H) 1.60 (s, 3 H) 0.86 (t, *J*=7.27 Hz, 2 H)

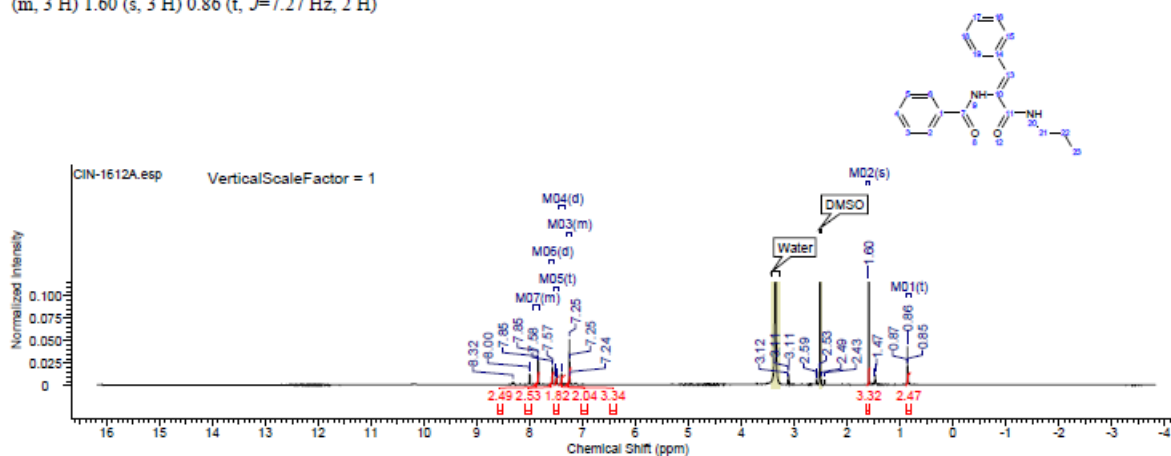



# Spectra of (1712)

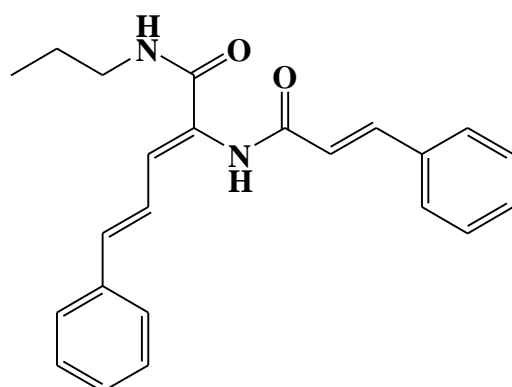

LC/MS

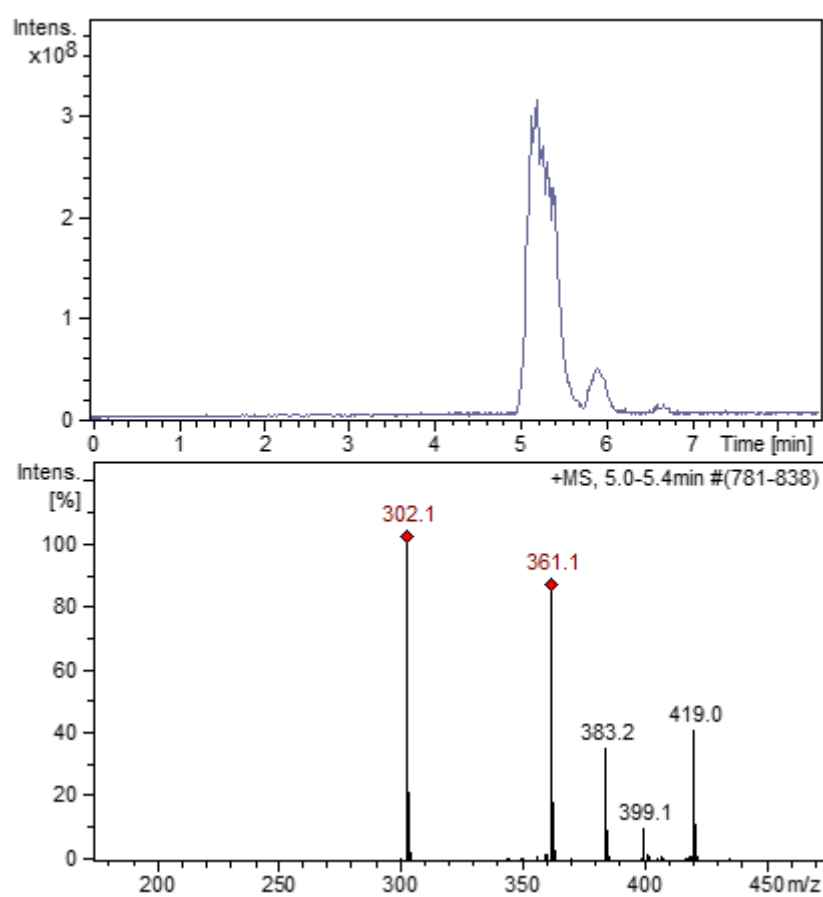

<sup>1</sup>H NMRThis report was created by ACD/NMR Processor Academic Edition. For more information go to [www.acdlabs.com/nmrproc/](http://www.acdlabs.com/nmrproc/)

1712

2018-10-06 5:35:14 PM

|                        |                                                                                                  |                        |                                            |
|------------------------|--------------------------------------------------------------------------------------------------|------------------------|--------------------------------------------|
| Formula                | C <sub>15</sub> H <sub>12</sub> N <sub>2</sub> O <sub>2</sub>                                    | FW                     | 360.4489                                   |
| Acquisition Time (sec) | 1.9268                                                                                           | Comment                | Dr.Mustafa El-Araby Sample : CUR-1712 DMSO |
| Date Stamp             | 08 Apr 2015 10:19:28                                                                             | Date                   | 08 Apr 2015 10:19:28                       |
| File Name              | E:\AAA_Research\Spectra Reservoir\April2015\Cin 1612 1712 1532\MUSTAFA CUR-1712 08-04-2015\301fd | Frequency (MHz)        | 850.15                                     |
| Nucleus                | <sup>1</sup> H                                                                                   | Number of Transients   | 20                                         |
| Owner                  | nmr                                                                                              | Original Points Count  | 32768                                      |
| SW (cycles) (Hz)       | 17006.80                                                                                         | Pulse Sequence         | zg30                                       |
| Sweep Width (Hz)       | 17006.28                                                                                         | Receiver Gain          | 9.04                                       |
|                        |                                                                                                  | Solvent                | DMSO-d <sub>6</sub>                        |
|                        |                                                                                                  | Spectrum Offset (Hz)   | 5250.0283                                  |
|                        |                                                                                                  | Temperature (degree C) | 24.999                                     |
|                        |                                                                                                  | Spectrum Type          | STANDARD                                   |

<sup>1</sup>H NMR (850 MHz, DMSO-*d*<sub>6</sub>)  $\delta$  ppm 9.69 (s, 1 H) 8.02 (t, *J*=5.71 Hz, 1 H) 7.64 (d, *J*=7.27 Hz, 2 H) 7.59 - 7.62 (m, 1 H) 7.50 - 7.55 (m, 3 H) 7.44 - 7.48 (m, 3 H) 7.40 - 7.44 (m, 2 H) 7.34 - 7.39 (m, 3 H) 7.28 - 7.31 (m, 1 H) 7.00 - 7.05 (m, 1 H) 6.87 - 6.92 (m, 2 H) 6.73 (d, *J*=10.90 Hz, 1 H) 3.17 - 3.21 (m, 1 H) 3.08 - 3.12 (m, 2 H) 1.53 - 1.60 (m, 1 H) 1.44 - 1.51 (m, 2 H) 0.94 (t, *J*=7.53 Hz, 1 H) 0.87 (t, *J*=7.27 Hz, 3 H)

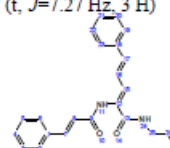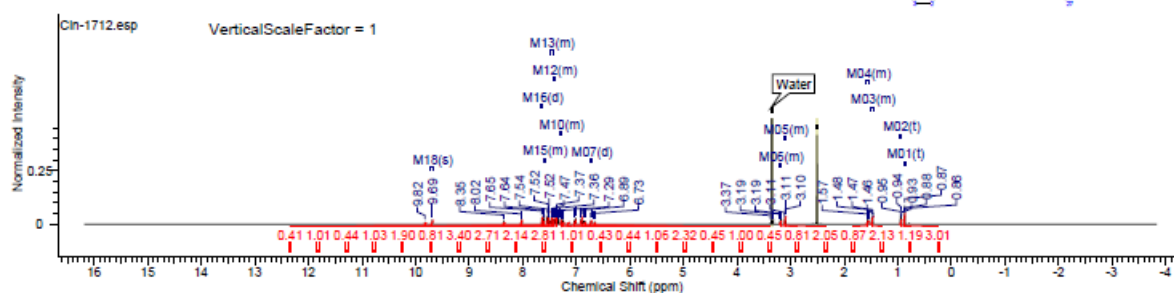

## Spectra of (1812)

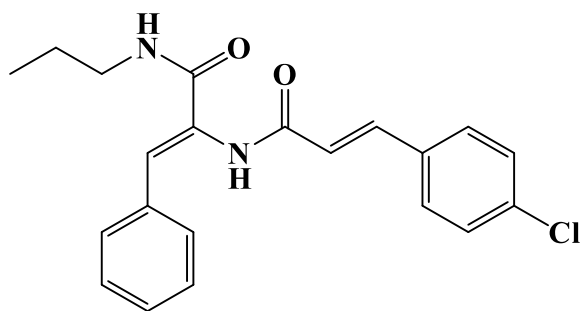

## LC/MS

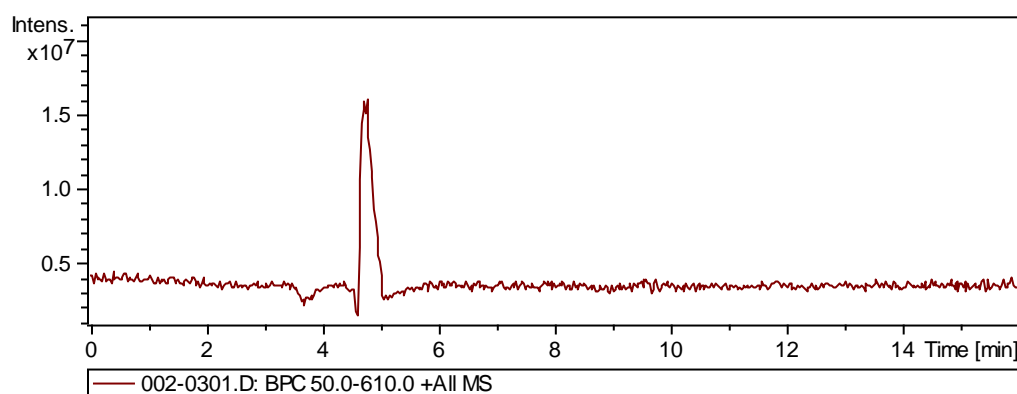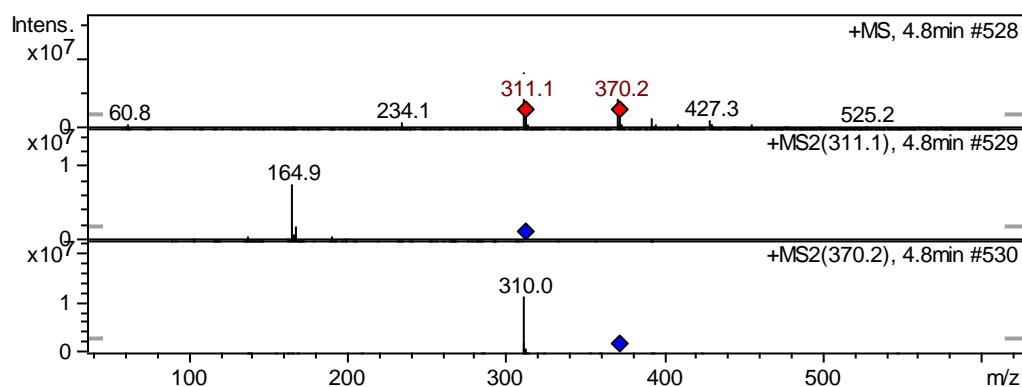

## FT-IR

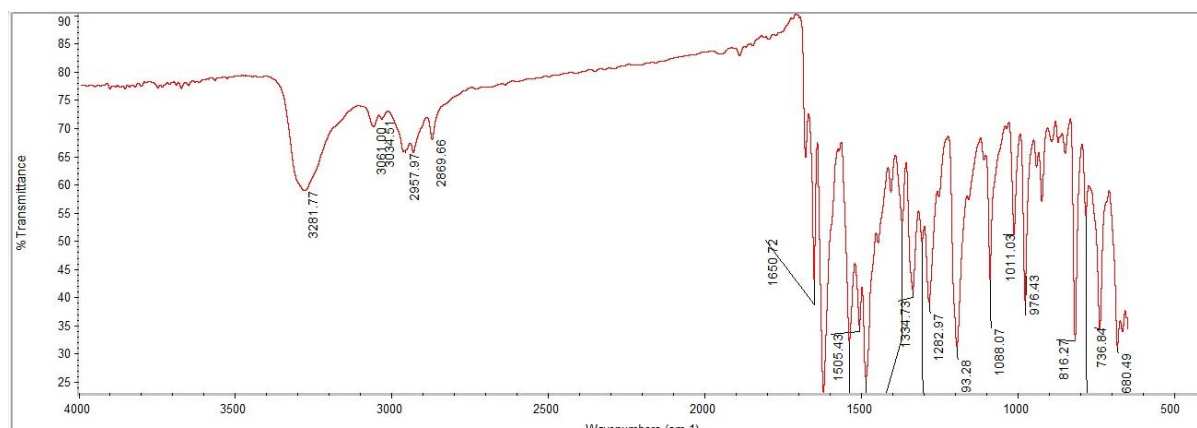

<sup>1</sup>H NMRThis report was created by ACD/NMR Processor Academic Edition. For more information go to [www.acdlabs.com/nmrproc/](http://www.acdlabs.com/nmrproc/)

## RAD-312

05/11/2016 9:57:37 AM  
Dr. Mustafa El-Araby Sample : RAD-312 DMSO

|                                                                         |                                                                                                |                        |                                           |
|-------------------------------------------------------------------------|------------------------------------------------------------------------------------------------|------------------------|-------------------------------------------|
| Formula C <sub>21</sub> H <sub>19</sub> ClN <sub>2</sub> O <sub>2</sub> |                                                                                                | FW 368.8566            |                                           |
| Acquisition Time (sec)                                                  | 1.9268                                                                                         | Comment                | Dr Mustafa El-Araby Sample : RAD-312 DMSO |
| Date Stamp                                                              | 08 Apr 2015 11:25:36                                                                           | Date                   | 08 Apr 2015 11:25:36                      |
| File Name                                                               | E:\Mostafa Alaraby Project\Oxazolone NMR\NMR final oxazolone\MUSTAFA RAD-312 08-04-2015\180fid | Frequency (MHz)        | 850.15                                    |
| Nucleus                                                                 | <sup>1</sup> H                                                                                 | Number of Transients   | 20                                        |
| Owner                                                                   | nmr                                                                                            | Points Count           | 32768                                     |
| SW (Hz)                                                                 | 17008.80                                                                                       | Pulse Sequence         | zg30                                      |
| Solvent                                                                 | DMSO-d <sub>6</sub>                                                                            | Spectrum Offset (Hz)   | 5250.0283                                 |
| Sweep Width (Hz)                                                        | 17008.28                                                                                       | Temperature (degree C) | 25.001                                    |
|                                                                         |                                                                                                | Original Points Count  | 32768                                     |
|                                                                         |                                                                                                | Receiver Gain          | 10.55                                     |
|                                                                         |                                                                                                | Spectrum Type          | STANDARD                                  |

<sup>1</sup>H NMR (850 MHz, DMSO-d<sub>6</sub>) δ 9.71 (br. s., 1H), 8.12 (t, *J* = 5.71 Hz, 1H), 7.64 (d, *J* = 8.30 Hz, 2H), 7.46 - 7.58 (m, 4H), 7.38 (t, *J* = 7.79 Hz, 2H), 7.29 - 7.33 (m, 1H), 7.00 (s, 1H), 6.87 (d, *J* = 16.09 Hz, 1H), 3.12 (q, *J* = 6.75 Hz, 2H), 1.49 (sxt, *J* = 7.27 Hz, 2H), 0.88 (t, *J* = 7.27 Hz, 3H)

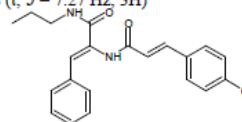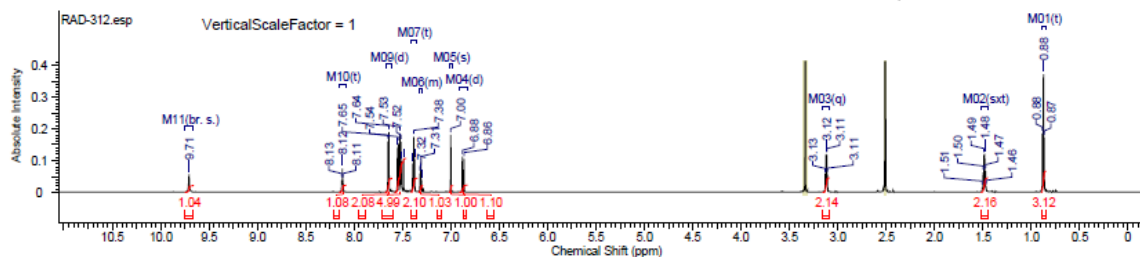<sup>13</sup>C NMRThis report was created by ACD/NMR Processor Academic Edition. For more information go to [www.acdlabs.com/nmrproc/](http://www.acdlabs.com/nmrproc/)

## RAD-312

20/09/2016 8:33:47 AM  
Dr. Mustafa Sample : RAD-312 DMSO

|                                                                         |                                                                                                                                        |                        |                                  |
|-------------------------------------------------------------------------|----------------------------------------------------------------------------------------------------------------------------------------|------------------------|----------------------------------|
| Formula C <sub>21</sub> H <sub>19</sub> ClN <sub>2</sub> O <sub>2</sub> |                                                                                                                                        | FW 368.8566            |                                  |
| Acquisition Time (sec)                                                  | 0.6423                                                                                                                                 | Comment                | Dr.Mostafa Sample : RAD-312 DMSO |
| Date Stamp                                                              | 20 Apr 2016 09:04:48                                                                                                                   |                        |                                  |
| File Name                                                               | E:\Projects\Mostafa Alaraby Project\Oxazolone\Oxazolone NMR\NMR final oxazolone\13 CNMR New 18-4-2016\MUSTAFA RAD-312 19-04-2016\80fid |                        |                                  |
| Frequency (MHz)                                                         | 213.77                                                                                                                                 | Nucleus                | <sup>13</sup> C                  |
| Original Points Count                                                   | 32768                                                                                                                                  | Owner                  | nmr                              |
| Receiver Gain                                                           | 188.93                                                                                                                                 | SW (cyclical) (Hz)     | 51020.41                         |
| Spectrum Type                                                           | STANDARD                                                                                                                               | Solvent                | DMSO-d6                          |
|                                                                         |                                                                                                                                        | Sweep Width (Hz)       | 51018.85                         |
|                                                                         |                                                                                                                                        | Temperature (degree C) | 25.000                           |
|                                                                         |                                                                                                                                        |                        |                                  |
|                                                                         |                                                                                                                                        |                        |                                  |
|                                                                         |                                                                                                                                        |                        |                                  |
|                                                                         |                                                                                                                                        |                        |                                  |
|                                                                         |                                                                                                                                        |                        |                                  |
|                                                                         |                                                                                                                                        |                        |                                  |
|                                                                         |                                                                                                                                        |                        |                                  |
|                                                                         |                                                                                                                                        |                        |                                  |
|                                                                         |                                                                                                                                        |                        |                                  |
|                                                                         |                                                                                                                                        |                        |                                  |
|                                                                         |                                                                                                                                        |                        |                                  |
|                                                                         |                                                                                                                                        |                        |                                  |
|                                                                         |                                                                                                                                        |                        |                                  |
|                                                                         |                                                                                                                                        |                        |                                  |
|                                                                         |                                                                                                                                        |                        |                                  |
|                                                                         |                                                                                                                                        |                        |                                  |
|                                                                         |                                                                                                                                        |                        |                                  |
|                                                                         |                                                                                                                                        |                        |                                  |
|                                                                         |                                                                                                                                        |                        |                                  |
|                                                                         |                                                                                                                                        |                        |                                  |
|                                                                         |                                                                                                                                        |                        |                                  |
|                                                                         |                                                                                                                                        |                        |                                  |
|                                                                         |                                                                                                                                        |                        |                                  |
|                                                                         |                                                                                                                                        |                        |                                  |
|                                                                         |                                                                                                                                        |                        |                                  |
|                                                                         |                                                                                                                                        |                        |                                  |
|                                                                         |                                                                                                                                        |                        |                                  |
|                                                                         |                                                                                                                                        |                        |                                  |
|                                                                         |                                                                                                                                        |                        |                                  |
|                                                                         |                                                                                                                                        |                        |                                  |
|                                                                         |                                                                                                                                        |                        |                                  |
|                                                                         |                                                                                                                                        |                        |                                  |
|                                                                         |                                                                                                                                        |                        |                                  |
|                                                                         |                                                                                                                                        |                        |                                  |
|                                                                         |                                                                                                                                        |                        |                                  |
|                                                                         |                                                                                                                                        |                        |                                  |
|                                                                         |                                                                                                                                        |                        |                                  |
|                                                                         |                                                                                                                                        |                        |                                  |
|                                                                         |                                                                                                                                        |                        |                                  |
|                                                                         |                                                                                                                                        |                        |                                  |
|                                                                         |                                                                                                                                        |                        |                                  |
|                                                                         |                                                                                                                                        |                        |                                  |
|                                                                         |                                                                                                                                        |                        |                                  |
|                                                                         |                                                                                                                                        |                        |                                  |
|                                                                         |                                                                                                                                        |                        |                                  |
|                                                                         |                                                                                                                                        |                        |                                  |
|                                                                         |                                                                                                                                        |                        |                                  |
|                                                                         |                                                                                                                                        |                        |                                  |
|                                                                         |                                                                                                                                        |                        |                                  |
|                                                                         |                                                                                                                                        |                        |                                  |
|                                                                         |                                                                                                                                        |                        |                                  |
|                                                                         |                                                                                                                                        |                        |                                  |
|                                                                         |                                                                                                                                        |                        |                                  |
|                                                                         |                                                                                                                                        |                        |                                  |
|                                                                         |                                                                                                                                        |                        |                                  |
|                                                                         |                                                                                                                                        |                        |                                  |
|                                                                         |                                                                                                                                        |                        |                                  |
|                                                                         |                                                                                                                                        |                        |                                  |
|                                                                         |                                                                                                                                        |                        |                                  |
|                                                                         |                                                                                                                                        |                        |                                  |
|                                                                         |                                                                                                                                        |                        |                                  |
|                                                                         |                                                                                                                                        |                        |                                  |
|                                                                         |                                                                                                                                        |                        |                                  |
|                                                                         |                                                                                                                                        |                        |                                  |
|                                                                         |                                                                                                                                        |                        |                                  |
|                                                                         |                                                                                                                                        |                        |                                  |
|                                                                         |                                                                                                                                        |                        |                                  |
|                                                                         |                                                                                                                                        |                        |                                  |
|                                                                         |                                                                                                                                        |                        |                                  |
|                                                                         |                                                                                                                                        |                        |                                  |
|                                                                         |                                                                                                                                        |                        |                                  |
|                                                                         |                                                                                                                                        |                        |                                  |
|                                                                         |                                                                                                                                        |                        |                                  |
|                                                                         |                                                                                                                                        |                        |                                  |
|                                                                         |                                                                                                                                        |                        |                                  |
|                                                                         |                                                                                                                                        |                        |                                  |
|                                                                         |                                                                                                                                        |                        |                                  |
|                                                                         |                                                                                                                                        |                        |                                  |
|                                                                         |                                                                                                                                        |                        |                                  |
|                                                                         |                                                                                                                                        |                        |                                  |
|                                                                         |                                                                                                                                        |                        |                                  |
|                                                                         |                                                                                                                                        |                        |                                  |
|                                                                         |                                                                                                                                        |                        |                                  |
|                                                                         |                                                                                                                                        |                        |                                  |
|                                                                         |                                                                                                                                        |                        |                                  |
|                                                                         |                                                                                                                                        |                        |                                  |
|                                                                         |                                                                                                                                        |                        |                                  |
|                                                                         |                                                                                                                                        |                        |                                  |
|                                                                         |                                                                                                                                        |                        |                                  |
|                                                                         |                                                                                                                                        |                        |                                  |
|                                                                         |                                                                                                                                        |                        |                                  |
|                                                                         |                                                                                                                                        |                        |                                  |
|                                                                         |                                                                                                                                        |                        |                                  |
|                                                                         |                                                                                                                                        |                        |                                  |
|                                                                         |                                                                                                                                        |                        |                                  |
|                                                                         |                                                                                                                                        |                        |                                  |
|                                                                         |                                                                                                                                        |                        |                                  |
|                                                                         |                                                                                                                                        |                        |                                  |
|                                                                         |                                                                                                                                        |                        |                                  |
|                                                                         |                                                                                                                                        |                        |                                  |
|                                                                         |                                                                                                                                        |                        |                                  |
|                                                                         |                                                                                                                                        |                        |                                  |
|                                                                         |                                                                                                                                        |                        |                                  |
|                                                                         |                                                                                                                                        |                        |                                  |
|                                                                         |                                                                                                                                        |                        |                                  |
|                                                                         |                                                                                                                                        |                        |                                  |
|                                                                         |                                                                                                                                        |                        |                                  |
|                                                                         |                                                                                                                                        |                        |                                  |
|                                                                         |                                                                                                                                        |                        |                                  |
|                                                                         |                                                                                                                                        |                        |                                  |
|                                                                         |                                                                                                                                        |                        |                                  |
|                                                                         |                                                                                                                                        |                        |                                  |
|                                                                         |                                                                                                                                        |                        |                                  |
|                                                                         |                                                                                                                                        |                        |                                  |
|                                                                         |                                                                                                                                        |                        |                                  |
|                                                                         |                                                                                                                                        |                        |                                  |
|                                                                         |                                                                                                                                        |                        |                                  |
|                                                                         |                                                                                                                                        |                        |                                  |
|                                                                         |                                                                                                                                        |                        |                                  |
|                                                                         |                                                                                                                                        |                        |                                  |
|                                                                         |                                                                                                                                        |                        |                                  |
|                                                                         |                                                                                                                                        |                        |                                  |
|                                                                         |                                                                                                                                        |                        |                                  |
|                                                                         |                                                                                                                                        |                        |                                  |
|                                                                         |                                                                                                                                        |                        |                                  |
|                                                                         |                                                                                                                                        |                        |                                  |
|                                                                         |                                                                                                                                        |                        |                                  |
|                                                                         |                                                                                                                                        |                        |                                  |
|                                                                         |                                                                                                                                        |                        |                                  |
|                                                                         |                                                                                                                                        |                        |                                  |
|                                                                         |                                                                                                                                        |                        |                                  |
|                                                                         |                                                                                                                                        |                        |                                  |
|                                                                         |                                                                                                                                        |                        |                                  |
|                                                                         |                                                                                                                                        |                        |                                  |
|                                                                         |                                                                                                                                        |                        |                                  |
|                                                                         |                                                                                                                                        |                        |                                  |
|                                                                         |                                                                                                                                        |                        |                                  |
|                                                                         |                                                                                                                                        |                        |                                  |
|                                                                         |                                                                                                                                        |                        |                                  |
|                                                                         |                                                                                                                                        |                        |                                  |
|                                                                         |                                                                                                                                        |                        |                                  |
|                                                                         |                                                                                                                                        |                        |                                  |
|                                                                         |                                                                                                                                        |                        |                                  |
|                                                                         |                                                                                                                                        |                        |                                  |
|                                                                         |                                                                                                                                        |                        |                                  |
|                                                                         |                                                                                                                                        |                        |                                  |
|                                                                         |                                                                                                                                        |                        |                                  |
|                                                                         |                                                                                                                                        |                        |                                  |
|                                                                         |                                                                                                                                        |                        |                                  |
|                                                                         |                                                                                                                                        |                        |                                  |
|                                                                         |                                                                                                                                        |                        |                                  |
|                                                                         |                                                                                                                                        |                        |                                  |
|                                                                         |                                                                                                                                        |                        |                                  |
|                                                                         |                                                                                                                                        |                        |                                  |
|                                                                         |                                                                                                                                        |                        |                                  |
|                                                                         |                                                                                                                                        |                        |                                  |
|                                                                         |                                                                                                                                        |                        |                                  |
|                                                                         |                                                                                                                                        |                        |                                  |
|                                                                         |                                                                                                                                        |                        |                                  |
|                                                                         |                                                                                                                                        |                        |                                  |
|                                                                         |                                                                                                                                        |                        |                                  |
|                                                                         |                                                                                                                                        |                        |                                  |
|                                                                         |                                                                                                                                        |                        |                                  |
|                                                                         |                                                                                                                                        |                        |                                  |
|                                                                         |                                                                                                                                        |                        |                                  |
|                                                                         |                                                                                                                                        |                        |                                  |
|                                                                         |                                                                                                                                        |                        |                                  |
|                                                                         |                                                                                                                                        |                        |                                  |
|                                                                         |                                                                                                                                        |                        |                                  |
|                                                                         |                                                                                                                                        |                        |                                  |
|                                                                         |                                                                                                                                        |                        |                                  |
|                                                                         |                                                                                                                                        |                        |                                  |
|                                                                         |                                                                                                                                        |                        |                                  |
|                                                                         |                                                                                                                                        |                        |                                  |
|                                                                         |                                                                                                                                        |                        |                                  |
|                                                                         |                                                                                                                                        |                        |                                  |
|                                                                         |                                                                                                                                        |                        |                                  |
|                                                                         |                                                                                                                                        |                        |                                  |
|                                                                         |                                                                                                                                        |                        |                                  |
|                                                                         |                                                                                                                                        |                        |                                  |
|                                                                         |                                                                                                                                        |                        |                                  |
|                                                                         |                                                                                                                                        |                        |                                  |
|                                                                         |                                                                                                                                        |                        |                                  |
|                                                                         |                                                                                                                                        |                        |                                  |
|                                                                         |                                                                                                                                        |                        |                                  |
|                                                                         |                                                                                                                                        |                        |                                  |
|                                                                         |                                                                                                                                        |                        |                                  |
|                                                                         |                                                                                                                                        |                        |                                  |
|                                                                         |                                                                                                                                        |                        |                                  |
|                                                                         |                                                                                                                                        |                        |                                  |
|                                                                         |                                                                                                                                        |                        |                                  |
|                                                                         |                                                                                                                                        |                        |                                  |
|                                                                         |                                                                                                                                        |                        |                                  |
|                                                                         |                                                                                                                                        |                        |                                  |
|                                                                         |                                                                                                                                        |                        |                                  |
|                                                                         |                                                                                                                                        |                        |                                  |
|                                                                         |                                                                                                                                        |                        |                                  |
|                                                                         |                                                                                                                                        |                        |                                  |
|                                                                         |                                                                                                                                        |                        |                                  |
|                                                                         |                                                                                                                                        |                        |                                  |
|                                                                         |                                                                                                                                        |                        |                                  |
|                                                                         |                                                                                                                                        |                        |                                  |
|                                                                         |                                                                                                                                        |                        |                                  |
|                                                                         |                                                                                                                                        |                        |                                  |
|                                                                         |                                                                                                                                        |                        |                                  |
|                                                                         |                                                                                                                                        |                        |                                  |
|                                                                         |                                                                                                                                        |                        |                                  |
|                                                                         |                                                                                                                                        |                        |                                  |
|                                                                         |                                                                                                                                        |                        |                                  |
|                                                                         |                                                                                                                                        |                        |                                  |
|                                                                         |                                                                                                                                        |                        |                                  |
|                                                                         |                                                                                                                                        |                        |                                  |
|                                                                         |                                                                                                                                        |                        |                                  |
|                                                                         |                                                                                                                                        |                        |                                  |
|                                                                         |                                                                                                                                        |                        |                                  |
|                                                                         |                                                                                                                                        |                        |                                  |
|                                                                         |                                                                                                                                        |                        |                                  |
|                                                                         |                                                                                                                                        |                        |                                  |
|                                                                         |                                                                                                                                        |                        |                                  |
|                                                                         |                                                                                                                                        |                        |                                  |
|                                                                         |                                                                                                                                        |                        |                                  |
|                                                                         |                                                                                                                                        |                        |                                  |
|                                                                         |                                                                                                                                        |                        |                                  |
|                                                                         |                                                                                                                                        |                        |                                  |
|                                                                         |                                                                                                                                        |                        |                                  |
|                                                                         |                                                                                                                                        |                        |                                  |
|                                                                         |                                                                                                                                        |                        |                                  |
|                                                                         |                                                                                                                                        |                        |                                  |
|                                                                         |                                                                                                                                        |                        |                                  |
|                                                                         |                                                                                                                                        |                        |                                  |
|                                                                         |                                                                                                                                        |                        |                                  |
|                                                                         |                                                                                                                                        |                        |                                  |
|                                                                         |                                                                                                                                        |                        |                                  |
|                                                                         |                                                                                                                                        |                        |                                  |
|                                                                         |                                                                                                                                        |                        |                                  |
|                                                                         |                                                                                                                                        |                        |                                  |
|                                                                         |                                                                                                                                        |                        |                                  |
|                                                                         |                                                                                                                                        |                        |                                  |
|                                                                         |                                                                                                                                        |                        |                                  |
|                                                                         |                                                                                                                                        |                        |                                  |
|                                                                         |                                                                                                                                        |                        |                                  |
|                                                                         |                                                                                                                                        |                        |                                  |
|                                                                         |                                                                                                                                        |                        |                                  |
|                                                                         |                                                                                                                                        |                        |                                  |
|                                                                         |                                                                                                                                        |                        |                                  |
|                                                                         |                                                                                                                                        |                        |                                  |
|                                                                         |                                                                                                                                        |                        |                                  |
|                                                                         |                                                                                                                                        |                        |                                  |
|                                                                         |                                                                                                                                        |                        |                                  |
|                                                                         |                                                                                                                                        |                        |                                  |
|                                                                         |                                                                                                                                        |                        |                                  |
|                                                                         |                                                                                                                                        |                        |                                  |
|                                                                         |                                                                                                                                        |                        |                                  |
|                                                                         |                                                                                                                                        |                        |                                  |
|                                                                         |                                                                                                                                        |                        |                                  |
|                                                                         |                                                                                                                                        |                        |                                  |
|                                                                         |                                                                                                                                        |                        |                                  |
|                                                                         |                                                                                                                                        |                        |                                  |
|                                                                         |                                                                                                                                        |                        |                                  |
|                                                                         |                                                                                                                                        |                        |                                  |
|                                                                         |                                                                                                                                        |                        |                                  |
|                                                                         |                                                                                                                                        |                        |                                  |
|                                                                         |                                                                                                                                        |                        |                                  |
|                                                                         |                                                                                                                                        |                        |                                  |
|                                                                         |                                                                                                                                        |                        |                                  |
|                                                                         |                                                                                                                                        |                        |                                  |
|                                                                         |                                                                                                                                        |                        |                                  |
|                                                                         |                                                                                                                                        |                        |                                  |
|                                                                         |                                                                                                                                        |                        |                                  |
|                                                                         |                                                                                                                                        |                        |                                  |
|                                                                         |                                                                                                                                        |                        |                                  |
|                                                                         |                                                                                                                                        |                        |                                  |
|                                                                         |                                                                                                                                        |                        |                                  |
|                                                                         |                                                                                                                                        |                        |                                  |
|                                                                         |                                                                                                                                        |                        |                                  |
|                                                                         |                                                                                                                                        |                        |                                  |
|                                                                         |                                                                                                                                        |                        |                                  |
|                                                                         |                                                                                                                                        |                        |                                  |
|                                                                         |                                                                                                                                        |                        |                                  |
|                                                                         |                                                                                                                                        |                        |                                  |
|                                                                         |                                                                                                                                        |                        |                                  |
|                                                                         |                                                                                                                                        |                        |                                  |
|                                                                         |                                                                                                                                        |                        |                                  |

<sup>13</sup>C NMR (214 MHz, DMSO-d<sub>6</sub>) δ 165.1, 164.5, 138.7, 134.3, 133.8, 130.4, 129.5, 129.4, 129.2, 128.7, 128.6, 127.0, 122.4, 41.1, 39.8, 39.7, 39.6, 39.4, 39.3, 39.2, 22.4, 11.5

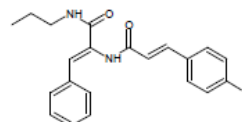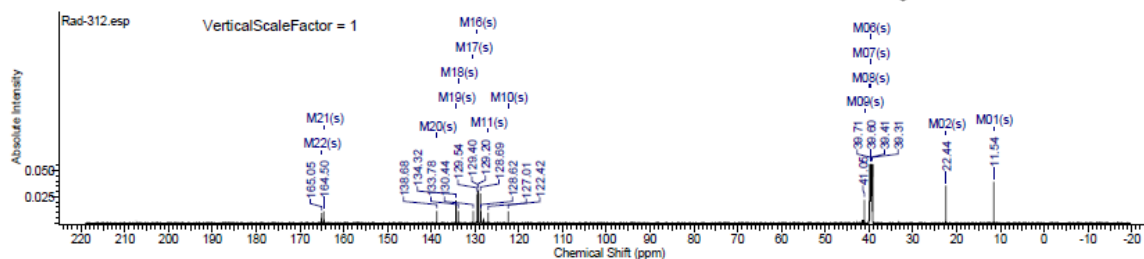

Spectra of (1912)

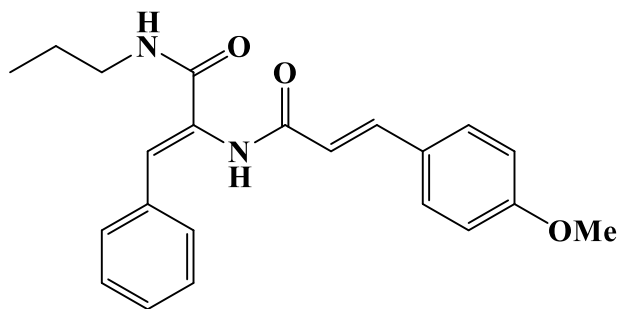

## LC/MS

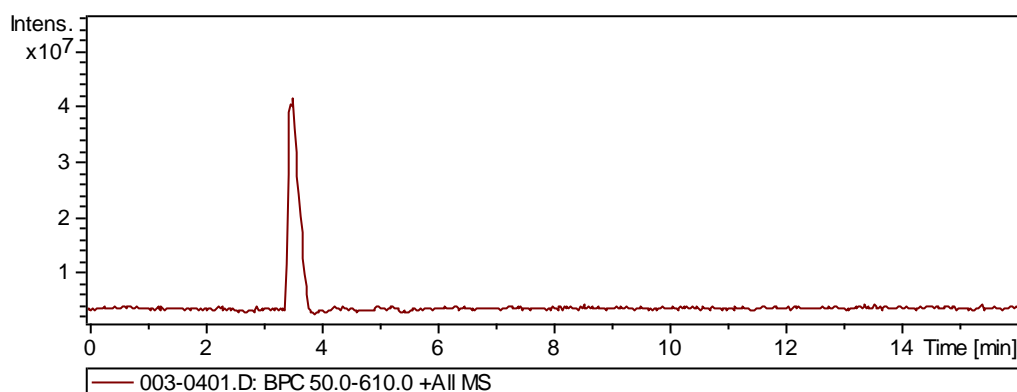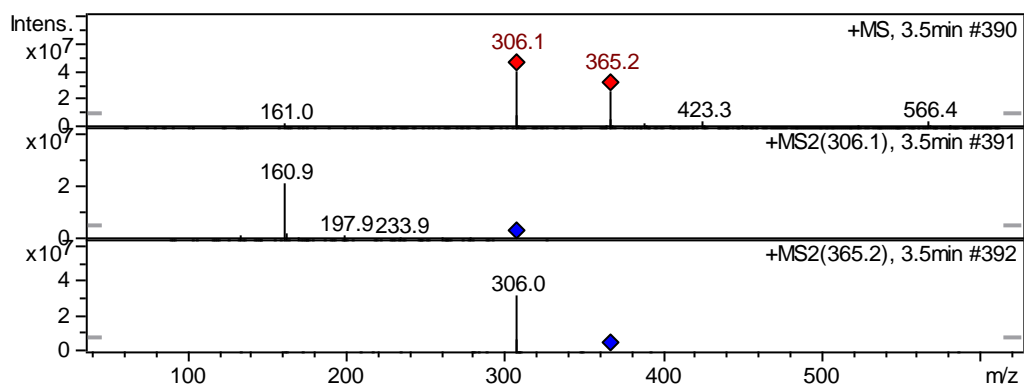

## FT-IR

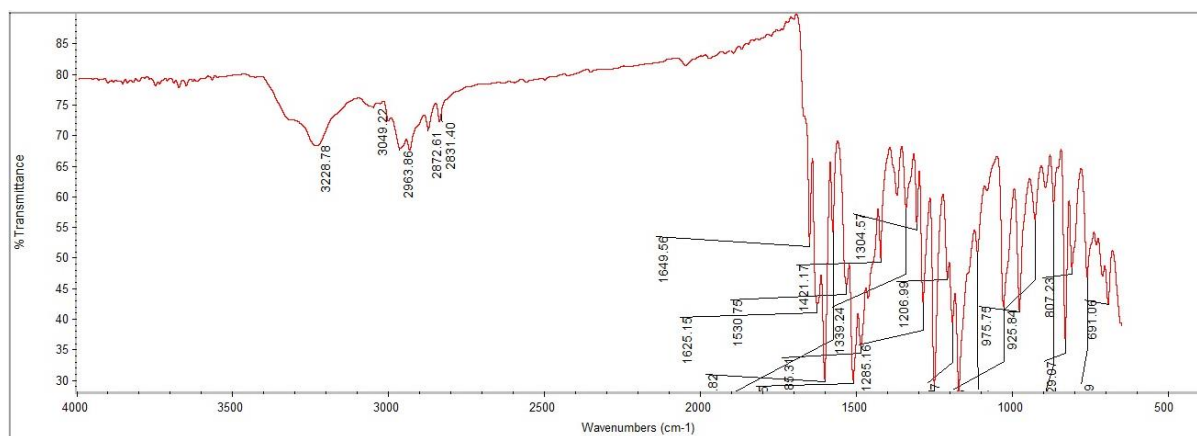

## <sup>1</sup>H NMR

## Supplementary Information

This report was created by ACD/NMR Processor Academic Edition. For more information go to [www.acdlabs.com/nmrproc/](http://www.acdlabs.com/nmrproc/)

### RAD-313

05/11/2016 10:04:00 AM  
Dr.Mustafa Sample : RAD-313 DMSO PROTON DMSO (D:Magdy) nmr 32

|                                                                       |                                                                                               |                        |                                                               |                      |           |                       |          |
|-----------------------------------------------------------------------|-----------------------------------------------------------------------------------------------|------------------------|---------------------------------------------------------------|----------------------|-----------|-----------------------|----------|
| Formula C <sub>26</sub> H <sub>24</sub> N <sub>2</sub> O <sub>4</sub> | FW                                                                                            | 364.4376               |                                                               |                      |           |                       |          |
| Acquisition Time (sec)                                                | 2.6564                                                                                        | Comment                | Dr.Mustafa Sample : RAD-313 DMSO PROTON DMSO (D:Magdy) nmr 32 |                      |           |                       |          |
| Date                                                                  | 18 Jun 2015 16:19:44                                                                          | Date Stamp             | 18 Jun 2015 16:19:44                                          |                      |           |                       |          |
| File Name                                                             | E:\Mostafa Alaraby Project\Oxazolone NMR\NMR final oxazolone\MUSTAFA RAD-313 18-06-2015\10fid |                        | Frequency (MHz)                                               | 600.15               |           |                       |          |
| Nucleus                                                               | <sup>1</sup> H                                                                                | Number of Transients   | 32                                                            | Origin               | spect     | Original Points Count | 32768    |
| Owner                                                                 | nmr                                                                                           | Points Count           | 32768                                                         | Pulse Sequence       | zg30      | Receiver Gain         | 144.00   |
| SW (cyclical) (Hz)                                                    | 12335.53                                                                                      | Solvent                | DMSO-d6                                                       | Spectrum Offset (Hz) | 3706.1750 | Spectrum Type         | STANDARD |
| Sweep Width (Hz)                                                      | 12335.15                                                                                      | Temperature (degree C) | 25.000                                                        |                      |           |                       |          |

<sup>1</sup>H NMR (600 MHz, DMSO-d<sub>6</sub>) δ 9.62 (s, 1H), 8.12 (t, J = 5.65 Hz, 1H), 7.51 - 7.62 (m, 4H), 7.45 (d, J = 15.43 Hz, 1H), 7.38 (t, J = 7.72 Hz, 2H), 7.28 - 7.33 (m, 1H), 7.02 (d, J = 8.66 Hz, 2H), 6.97 (s, 1H), 6.72 (d, J = 15.81 Hz, 1H), 3.81 (s, 3H), 3.11 (q, J = 6.40 Hz, 2H), 1.48 (sxt, J = 7.30 Hz, 2H), 0.87 (t, J = 7.34 Hz, 3H)

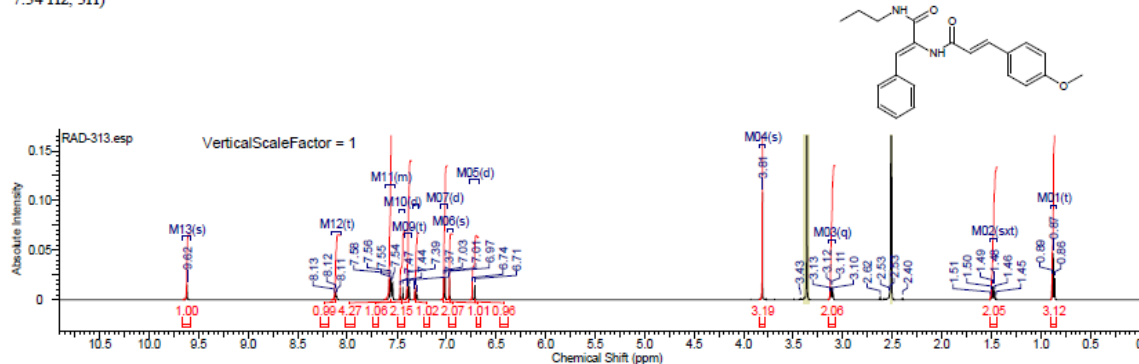

### <sup>13</sup>C NMR

This report was created by ACD/NMR Processor Academic Edition. For more information go to [www.acdlabs.com/nmrproc/](http://www.acdlabs.com/nmrproc/)

### RAD-313

20/09/2016 8:34:14 AM  
Dr.Mustafa Sample : RAD-313 DMSO

|                                                                       |                                                                                                                                        |                   |                                   |                        |         |                      |            |
|-----------------------------------------------------------------------|----------------------------------------------------------------------------------------------------------------------------------------|-------------------|-----------------------------------|------------------------|---------|----------------------|------------|
| Formula C <sub>26</sub> H <sub>24</sub> N <sub>2</sub> O <sub>4</sub> | FW                                                                                                                                     | 364.4375          |                                   |                        |         |                      |            |
| Acquisition Time (sec)                                                | 0.6423                                                                                                                                 | Comment           | Dr. Mostafa Sample : RAD-313 DMSO |                        | Date    | 19 Apr 2016 20:25:20 |            |
| Date Stamp                                                            | 19 Apr 2016 20:25:20                                                                                                                   |                   |                                   |                        |         |                      |            |
| File Name                                                             | E:\Projects\Mostafa Alaraby Project\Oxazolone\Oxazolone NMR\NMR final oxazolone\13 CNMR New 18-4-2016\MUSTAFA RAD-313 19-04-2016\30fid |                   |                                   |                        |         |                      |            |
| Frequency (MHz)                                                       | 213.77                                                                                                                                 | Nucleus           | <sup>13</sup> C                   | Number of Transients   | 3500    | Origin               | spec       |
| Original Points Count                                                 | 32768                                                                                                                                  | Owner             | nmr                               | Points Count           | 32768   | Pulse Sequence       | zgpg30     |
| Receiver Gain                                                         | 186.93                                                                                                                                 | SW(cyclical) (Hz) | 51020.41                          | Solvent                | DMSO-d6 | Spectrum Offset (Hz) | 21289.1406 |
| Spectrum Type                                                         | STANDARD                                                                                                                               | Sweep Width (Hz)  | 51018.85                          | Temperature (degree C) | 25.000  |                      |            |

<sup>13</sup>C NMR (214 MHz, DMSO-d<sub>6</sub>) δ 165.1, 164.9, 160.6, 139.7, 134.4, 130.7, 129.4, 129.3, 128.6, 128.5, 127.3, 126.6, 119.0, 114.5, 55.4, 41.0, 39.8, 39.7, 39.6, 39.4, 39.3, 39.2, 22.4, 11.5

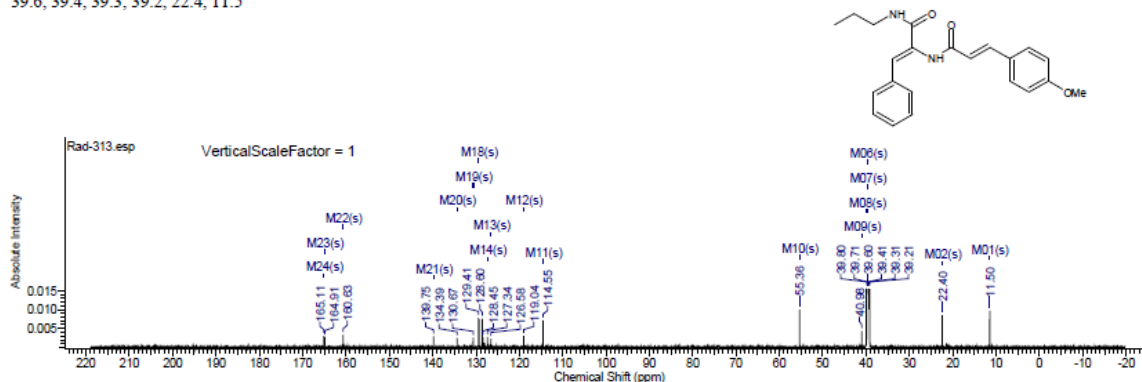

Spectra of (2012)

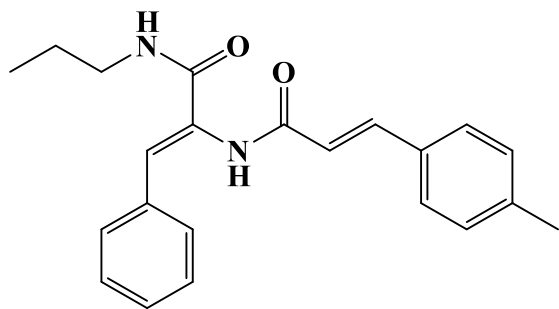

## LC/MS

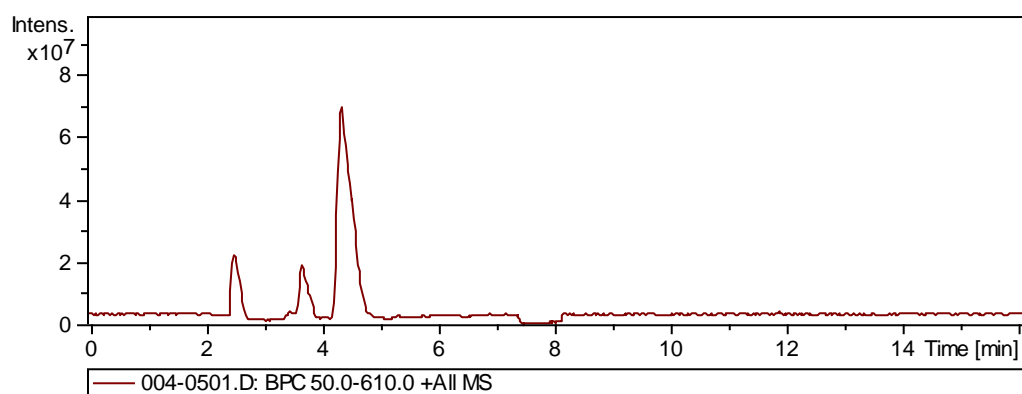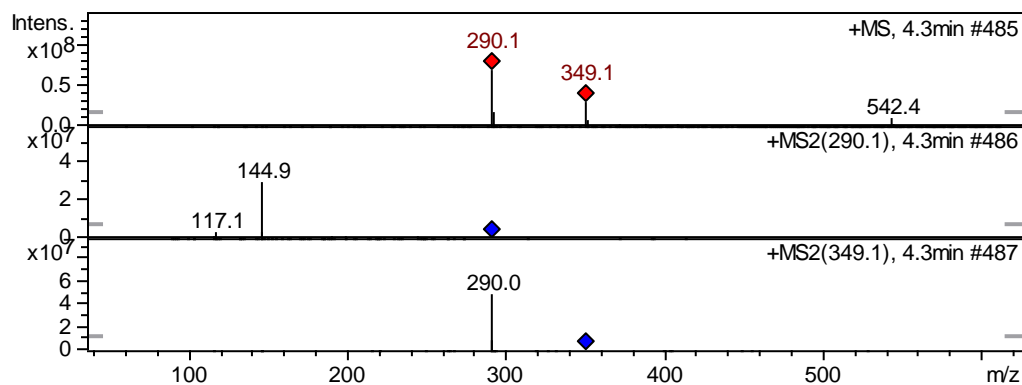

## $^1\text{H}$ NMR

## Supplementary Information

This report was created by ACD/NMR Processor Academic Edition. For more information go to [www.acdlabs.com/nmrproc/](http://www.acdlabs.com/nmrproc/)

### RAD-314

02/10/2016 6:30:24 AM  
Dr.Mustafa El-Araby Sample : RAD-314 DMSO

|                                                                       |                                                                                               |                        |                                      |                      |           |                      |
|-----------------------------------------------------------------------|-----------------------------------------------------------------------------------------------|------------------------|--------------------------------------|----------------------|-----------|----------------------|
| Formula C <sub>21</sub> H <sub>21</sub> N <sub>3</sub> O <sub>2</sub> | FW                                                                                            | 348.4382               |                                      |                      |           |                      |
| Acquisition Time (sec)                                                | 1.9268                                                                                        | Comment                | Dr.Mustafa El-Araby Sample : RAD-314 | DMSO                 | Date      | 08 Apr 2015 10:23:44 |
| Date Stamp                                                            | 08 Apr 2015 10:23:44                                                                          |                        |                                      |                      |           |                      |
| File Name                                                             | E:\Mostafa Alaraby Project\Oxazolone NMR\NMR final oxazolone\MUSTAFA RAD-314_08-04-2015\40fid | Frequency (MHz)        | 850.15                               |                      |           |                      |
| Nucleus                                                               | <sup>1</sup> H                                                                                | Number of Transients   | 20                                   | Origin               | spect     |                      |
| Owner                                                                 | nmr                                                                                           | Points Count           | 32768                                | Pulse Sequence       | zg30      |                      |
| SW(cyclical) (Hz)                                                     | 17006.80                                                                                      | Solvent                | DMSO-d6                              | Receiver Gain        | 9.04      |                      |
| Sweep Width (Hz)                                                      | 17006.28                                                                                      | Temperature (degree C) | 25.000                               | Spectrum Offset (Hz) | 5250.0283 |                      |
|                                                                       |                                                                                               |                        |                                      | Spectrum Type        | STANDARD  |                      |

<sup>1</sup>H NMR (850 MHz, DMSO-d<sub>6</sub>) δ 9.65 (br. s., 1H), 8.11 (t, *J* = 5.45 Hz, 1H), 7.49 - 7.57 (m, 3H), 7.46 (d, *J* = 15.57 Hz, 1H), 7.34 - 7.43 (m, 3H), 7.28 - 7.34 (m, 2H), 7.26 (d, *J* = 7.78 Hz, 1H), 6.95 - 7.03 (m, 1H), 6.82 (d, *J* = 15.57 Hz, 1H), 3.11 (td, *J* = 6.68, 13.10 Hz, 2H), 1.48 (qd, *J* = 7.07, 14.08 Hz, 2H), 0.84 - 0.90 (m, 3H)

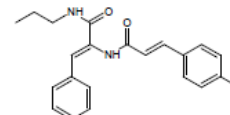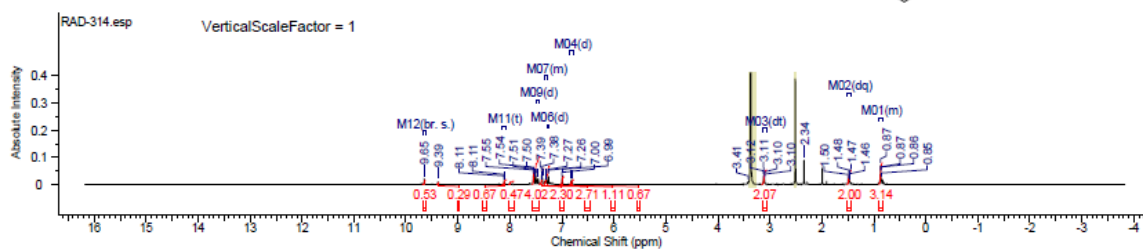

### <sup>13</sup>C NMR

This report was created by ACD/NMR Processor Academic Edition. For more information go to [www.acdlabs.com/nmrproc/](http://www.acdlabs.com/nmrproc/)

### RAD-314

20/09/2016 8:34:47 AM  
Dr.Mustafa Sample : RAD-314 DMSO

|                                                                       |                                                                                                                                        |                    |                                  |                        |                      |
|-----------------------------------------------------------------------|----------------------------------------------------------------------------------------------------------------------------------------|--------------------|----------------------------------|------------------------|----------------------|
| Formula C <sub>21</sub> H <sub>21</sub> N <sub>3</sub> O <sub>2</sub> | FW                                                                                                                                     | 348.4382           |                                  |                        |                      |
| Acquisition Time (sec)                                                | 0.6423                                                                                                                                 | Comment            | Dr.Mustafa Sample : RAD-314 DMSO | Date                   | 19 Apr 2016 23:07:28 |
| Date Stamp                                                            | 19 Apr 2016 23:07:28                                                                                                                   |                    |                                  |                        |                      |
| File Name                                                             | E:\Projects\Mostafa Alaraby Project\Oxazolone\Oxazolone NMR\NMR final oxazolone\13 CNMR New 18-4-2016\MUSTAFA RAD-314_19-04-2016\40fid |                    |                                  |                        |                      |
| Frequency (MHz)                                                       | 213.77                                                                                                                                 | Nucleus            | <sup>13</sup> C                  | Number of Transients   | 3500                 |
| Original Points Count                                                 | 32768                                                                                                                                  | Owner              | nmr                              | Points Count           | 32768                |
| Receiver Gain                                                         | 188.93                                                                                                                                 | SW (cyclical) (Hz) | 51020.41                         | Solvent                | DMSO-d6              |
| Spectrum Type                                                         | STANDARD                                                                                                                               | Sweep Width (Hz)   | 51018.85                         | Temperature (degree C) | 25.006               |
|                                                                       |                                                                                                                                        |                    |                                  | Pulse Sequence         | zgpg30               |
|                                                                       |                                                                                                                                        |                    |                                  | Spectrum Offset (Hz)   | 21309.3809           |

<sup>13</sup>C NMR (214 MHz, DMSO-d<sub>6</sub>) δ 165.2, 164.9, 140.1, 139.8, 134.4, 132.1, 130.6, 129.8, 129.4, 128.7, 127.9, 127.5, 126.9, 120.6, 41.1, 39.8, 39.7, 39.6, 39.4, 39.3, 39.2, 22.5, 21.1, 11.6

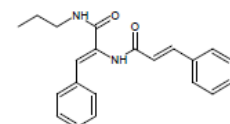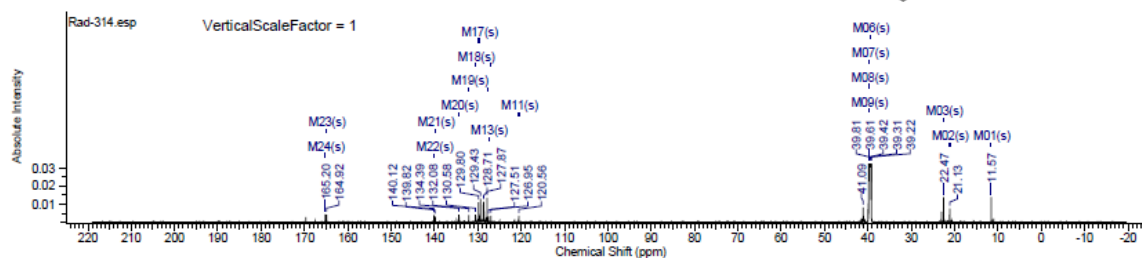

## Spectra of (2112)



# Supplementary Information

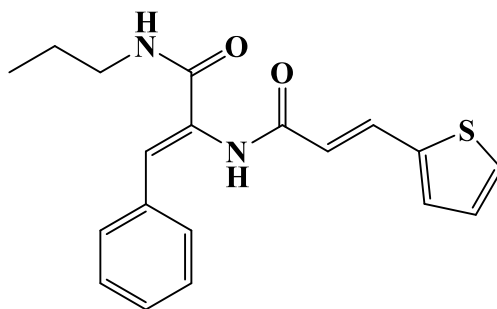

## LC/MS

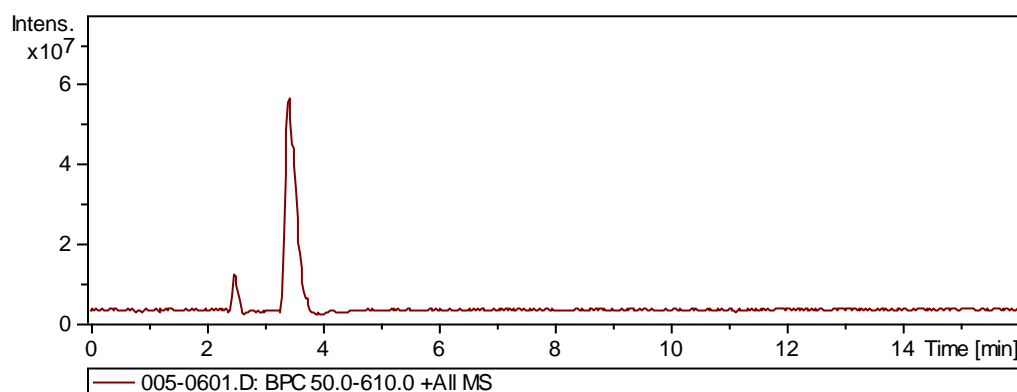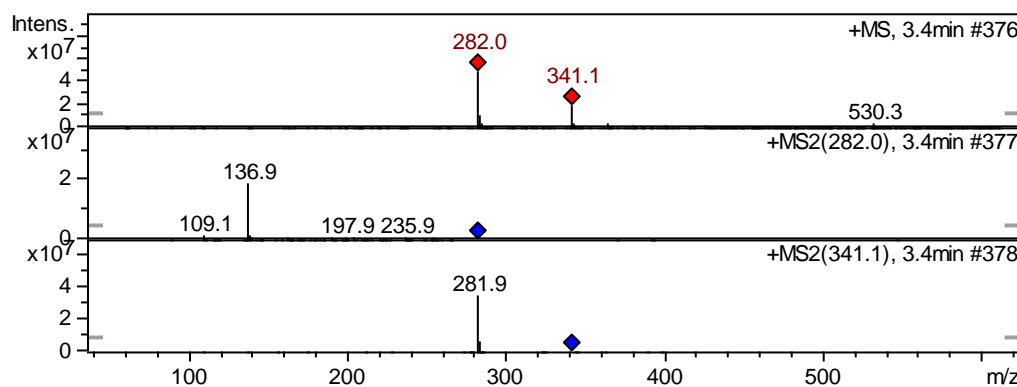

## FT-IR

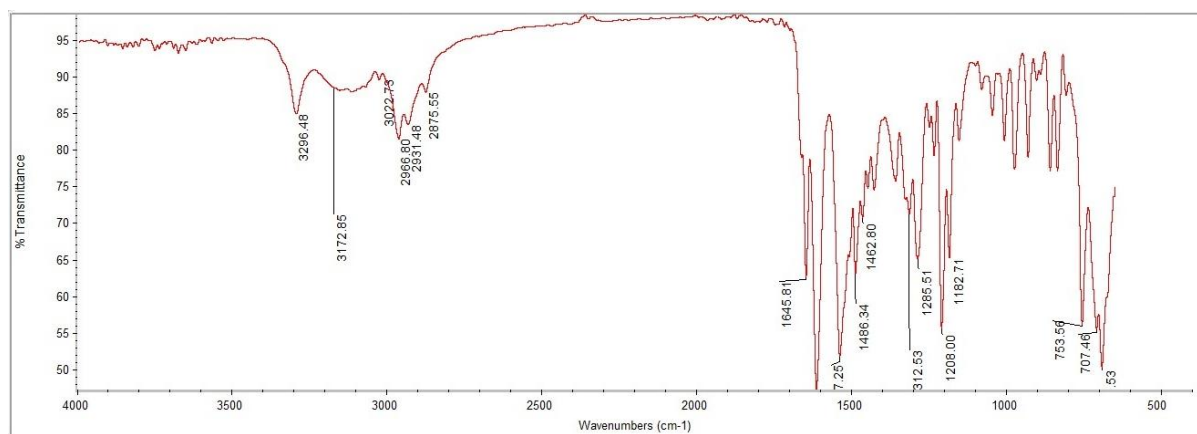

## <sup>1</sup>H NMR

## Supplementary Information

This report was created by ACD/NMR Processor Academic Edition. For more information go to [www.acdlabs.com/nmrproc/](http://www.acdlabs.com/nmrproc/)

### RAD-315

08/11/2016 7:51:58 AM  
Dr. Mustafa El-Araby Sample : RAD-315 DMSO

|                        |                                                                                                 |                        |                                            |
|------------------------|-------------------------------------------------------------------------------------------------|------------------------|--------------------------------------------|
| Formula                | C <sub>18</sub> H <sub>18</sub> N <sub>2</sub> O <sub>2</sub> S                                 | FW                     | 340.4393                                   |
| Acquisition Time (sec) | 1.9268                                                                                          | Comment                | Dr. Mustafa El-Araby Sample : RAD-315 DMSO |
| Date Stamp             | 08 Apr 2015 10:53:36                                                                            | Date                   | 08 Apr 2015 10:53:36                       |
| File Name              | E:\Mostafa Alaraby Project\Oxazolone NMR\NMR final oxazolone\MUSTAFA RAD-315_08-04-2015\110.fid | Frequency (MHz)        | 850.15                                     |
| Nucleus                | <sup>1</sup> H                                                                                  | Number of Transients   | 20                                         |
| Owner                  | nmr                                                                                             | Points Count           | 32768                                      |
| SW (Hz)                | 17006.80                                                                                        | Solvent                | DMSO-d <sub>6</sub>                        |
| Sweep Width (Hz)       | 17006.28                                                                                        | Temperature (degree C) | 25.001                                     |
|                        |                                                                                                 | Pulse Sequence         | zg30                                       |
|                        |                                                                                                 | Spectrum Offset (Hz)   | 5250.0283                                  |
|                        |                                                                                                 | Receiver Gain          | 10.55                                      |
|                        |                                                                                                 | Spectrum Type          | STANDARD                                   |

<sup>1</sup>H NMR (850 MHz, DMSO-d<sub>6</sub>) δ 9.65 (s, 1H), 8.10 (t, *J* = 5.71 Hz, 1H), 7.61 - 7.68 (m, 2H), 7.53 (d, *J* = 7.79 Hz, 2H), 7.43 (d, *J* = 3.11 Hz, 1H), 7.39 (t, *J* = 7.79 Hz, 2H), 7.28 - 7.33 (m, 1H), 7.14 (dd, *J* = 3.37, 4.93 Hz, 1H), 6.99 (s, 1H), 6.62 (d, *J* = 15.57 Hz, 1H), 3.11 (q, *J* = 6.75 Hz, 2H), 1.48 (sxt, *J* = 7.27 Hz, 2H), 0.87 (t, *J* = 7.53 Hz, 3H)

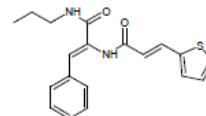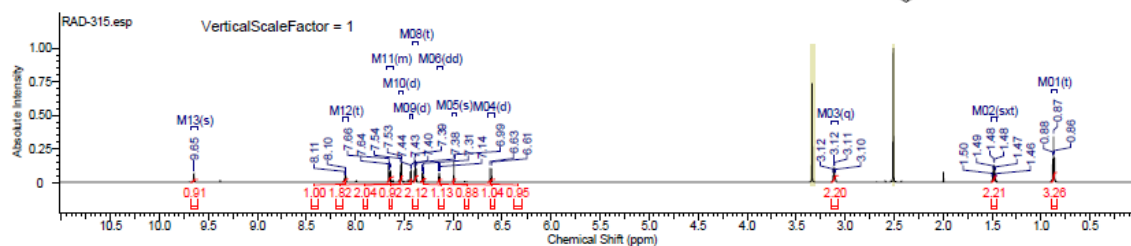

### <sup>13</sup>C NMR

This report was created by ACD/NMR Processor Academic Edition. For more information go to [www.acdlabs.com/nmrproc/](http://www.acdlabs.com/nmrproc/)

### RAD-315

20/09/2016 8:35:12 AM  
Dr. Mustafa Sample : RAD-315 DMSO

|                        |                                                                                                                                         |                        |                                   |
|------------------------|-----------------------------------------------------------------------------------------------------------------------------------------|------------------------|-----------------------------------|
| Formula                | C <sub>18</sub> H <sub>18</sub> N <sub>2</sub> O <sub>2</sub> S                                                                         | FW                     | 340.4393                          |
| Acquisition Time (sec) | 0.6423                                                                                                                                  | Comment                | Dr. Mustafa Sample : RAD-315 DMSO |
| Date Stamp             | 20 Apr 2016 01:49:36                                                                                                                    | Date                   | 20 Apr 2016 01:49:36              |
| File Name              | E:\Projects\Mostafa Alaraby Project\Oxazolone\Oxazolone NMR\NMR final oxazolone\13 CNMR New 18-4-2016\MUSTAFA RAD-315_19-04-2016\50.fid | Frequency (MHz)        | 125.77                            |
| Original Points Count  | 32768                                                                                                                                   | Nucleus                | <sup>13</sup> C                   |
| Receiver Gain          | 185.93                                                                                                                                  | Number of Transients   | 3500                              |
| Spectrum Type          | STANDARD                                                                                                                                | Points Count           | 32768                             |
|                        |                                                                                                                                         | Solvent                | DMSO-d <sub>6</sub>               |
|                        |                                                                                                                                         | Spectrum Offset (Hz)   | 21293.8125                        |
|                        |                                                                                                                                         | Temperature (degree C) | 25.000                            |

<sup>13</sup>C NMR (125 MHz, DMSO-d<sub>6</sub>) δ 165.0, 164.4, 139.8, 134.3, 133.0, 131.3, 130.5, 129.3, 128.6, 128.6, 128.5, 128.5, 126.9, 120.3, 41.0, 39.8, 39.7, 39.6, 39.4, 39.3, 39.2, 22.4, 11.5

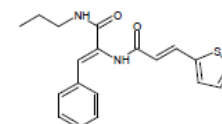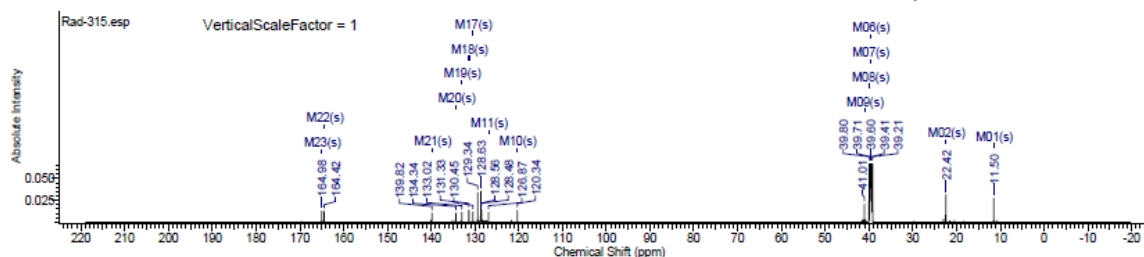

## Spectra of (2212)

# Supplementary Information

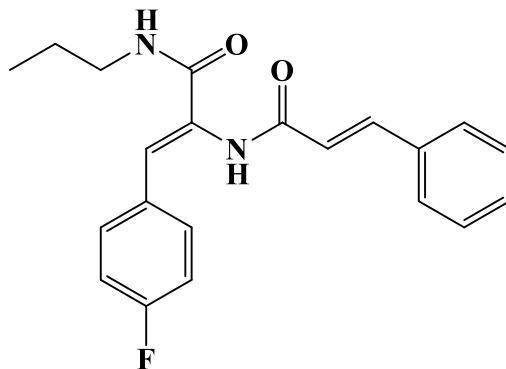

## LC/MS

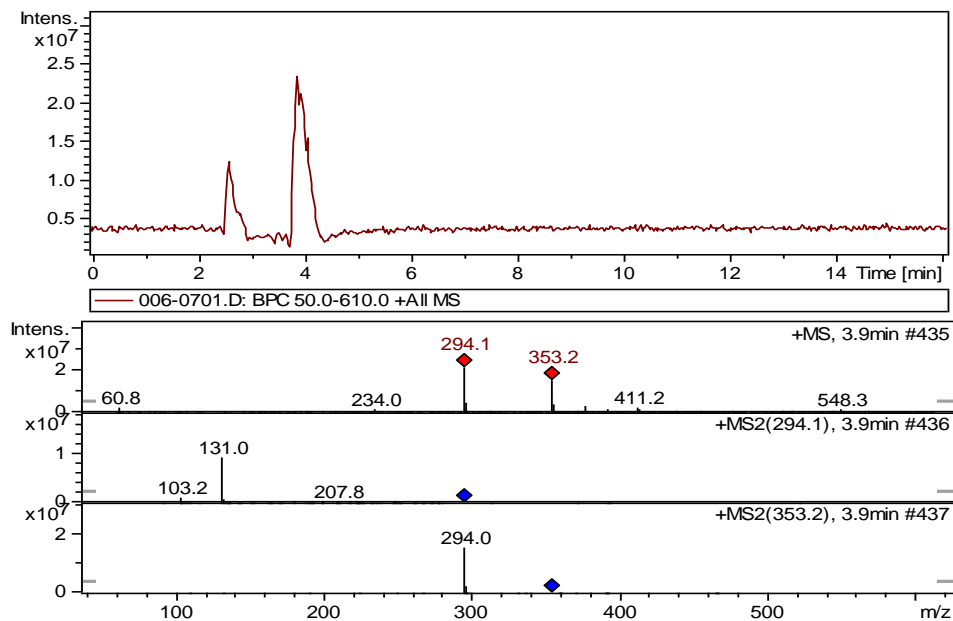

## <sup>1</sup>H NMR

2212

|                        |                                                                                                       |                    |                             |                        |         |                      |
|------------------------|-------------------------------------------------------------------------------------------------------|--------------------|-----------------------------|------------------------|---------|----------------------|
| Acquisition Time (sec) | 1.9208                                                                                                | Comment            | Dr.Mostafa Sample : RAD-321 | DMSO                   | Date    | 14 Feb 2017 12:29:36 |
| Date Stamp             | 14 Feb 2017 12:29:36                                                                                  |                    |                             |                        |         |                      |
| File Name              | E:\GoogleDrive_2018\ShuttleMOS-Final-Sep2018\Raw Data for Reviewers\MOSTAFA_RAD-321_14-02-2017\10.fid |                    |                             |                        |         |                      |
| Frequency (MHz)        | 500.15                                                                                                | Nucleus            | <sup>1</sup> H              | Number of Transients   | 64      | Origin               |
| Original Points Count  | 32788                                                                                                 | Owner              | nmr                         | Points Count           | 32788   | Pulse Sequence       |
| Receiver Gain          | 9.04                                                                                                  | SW (cyclical) (Hz) | 17008.80                    | Solvent                | DMSO-d6 | Spectrum Offset (Hz) |
| Spectrum Type          | STANDARD                                                                                              | Sweep Width (Hz)   | 17008.28                    | Temperature (degree C) | 25.000  | 6250.0283            |

<sup>1</sup>H NMR (DMSO-d<sub>6</sub>) δ ppm 9.68 (s, 1 H), 8.12 (s, 1 H), 7.56 - 7.67 (m, 4 H), 7.50 (d, J=16.09 Hz, 1 H), 7.44 - 7.47 (m, 2 H), 7.42 (d, J=7.78 Hz, 1 H), 7.23 (t, J=8.82 Hz, 2 H), 7.01 (s, 1 H), 6.86 (d, J=16.09 Hz, 1 H), 3.12 (q, J=6.75 Hz, 2 H), 1.45 - 1.52 (m, 2 H), 0.87 (t, J=7.53 Hz, 3 H)

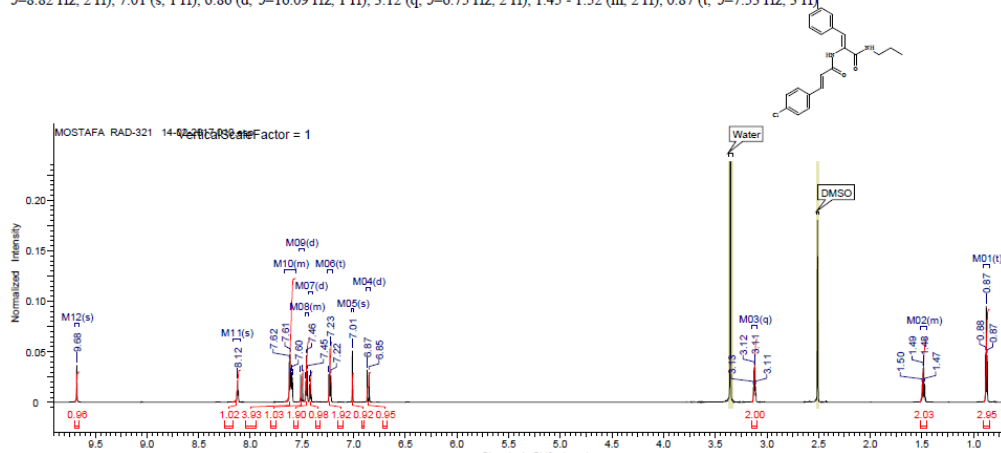

## Spectra of (2312)

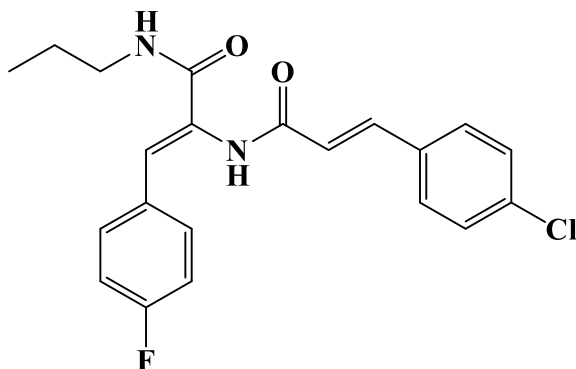

## LC/MS

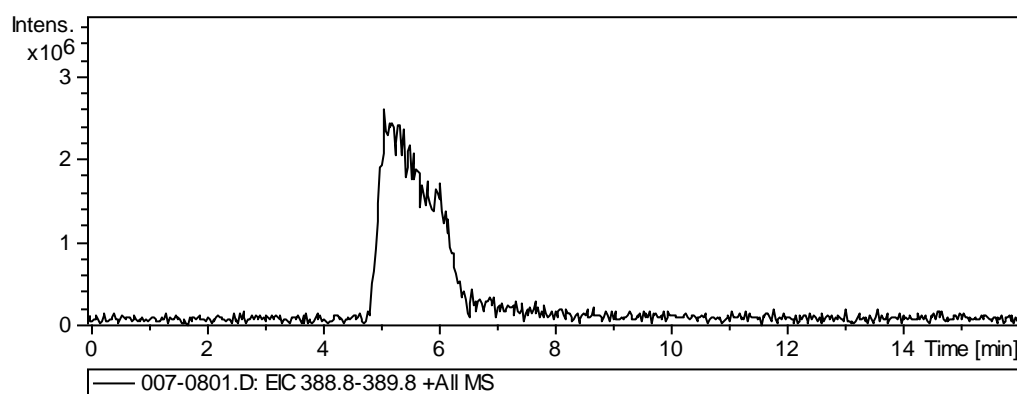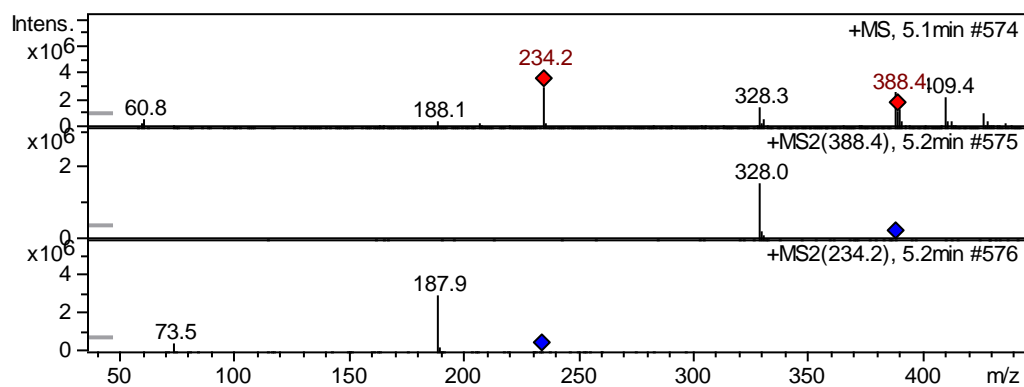

## FT-IR

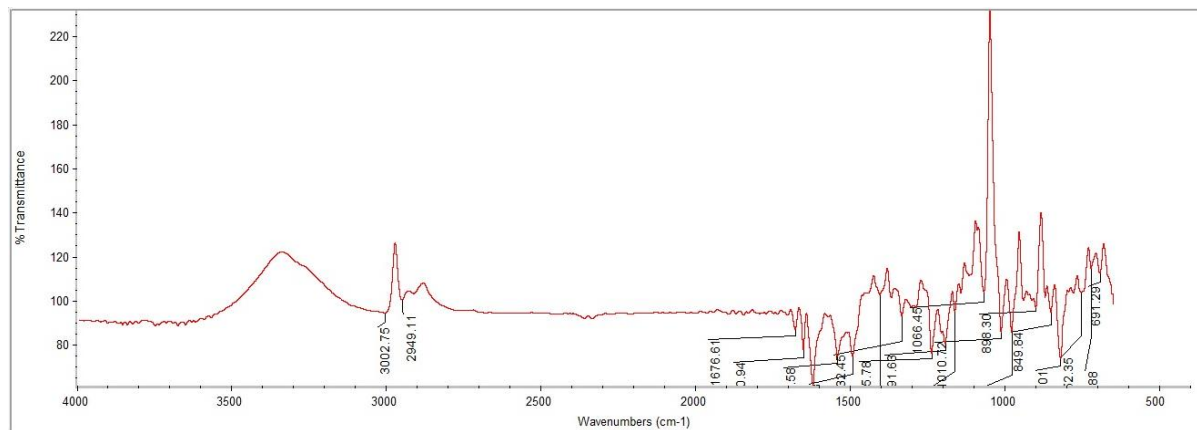<sup>1</sup>H NMR

## Supplementary Information

This report was created by ACD/NMR Processor Academic Edition. For more information go to [www.acdlabs.com/nmrproc/](http://www.acdlabs.com/nmrproc/)

### RAD-322

08/11/2016 7:58:08 AM  
Dr.Mustafa El-Araby Sample : RAD-322 DMSO

|                        |                                                                                               |                        |                                           |
|------------------------|-----------------------------------------------------------------------------------------------|------------------------|-------------------------------------------|
| Formula                | C <sub>21</sub> H <sub>19</sub> ClF <sub>2</sub> N <sub>3</sub> O <sub>2</sub>                | FW                     | 386.8471                                  |
| Acquisition Time (sec) | 1.9268                                                                                        | Comment                | Dr.Mustafa El-Araby Sample : RAD-322 DMSO |
| Date Stamp             | 08 Apr 2015 10:45:04                                                                          | Date                   | 08 Apr 2015 10:45:04                      |
| File Name              | E:\Mostafa Alaraby Project\Oxazolone NMR\NMR final oxazolone\MUSTAFA RAD-322 08-04-2015\90fid | Frequency (MHz)        | 850.15                                    |
| Nucleus                | <sup>1</sup> H                                                                                | Number of Transients   | 20                                        |
| Owner                  | nmr                                                                                           | Points Count           | 32768                                     |
| SW(cyclical) (Hz)      | 17008.80                                                                                      | Solvent                | DMSO-d6                                   |
| Sweep Width (Hz)       | 17008.28                                                                                      | Temperature (degree C) | 25.000                                    |
|                        |                                                                                               | Pulse Sequence         | zg30                                      |
|                        |                                                                                               | Spectrum Offset (Hz)   | 5250.0283                                 |
|                        |                                                                                               | Receiver Gain          | 10.55                                     |
|                        |                                                                                               | Spectrum Type          | STANDARD                                  |

<sup>1</sup>H NMR (850 MHz, DMSO-d<sub>6</sub>) δ 9.69 (s, 1H), 8.12 (t, J = 5.71 Hz, 1H), 7.64 (d, J = 8.30 Hz, 2H), 7.60 (dd, J = 5.71, 8.82 Hz, 2H), 7.46 - 7.55 (m, 3H), 7.21 - 7.25 (m, 2H), 7.01 (s, 1H), 6.85 (d, J = 16.09 Hz, 1H), 3.11 (q, J = 6.40 Hz, 2H), 1.48 (sxt, J = 7.27 Hz, 2H), 0.87 (t, J = 7.27 Hz, 3H)

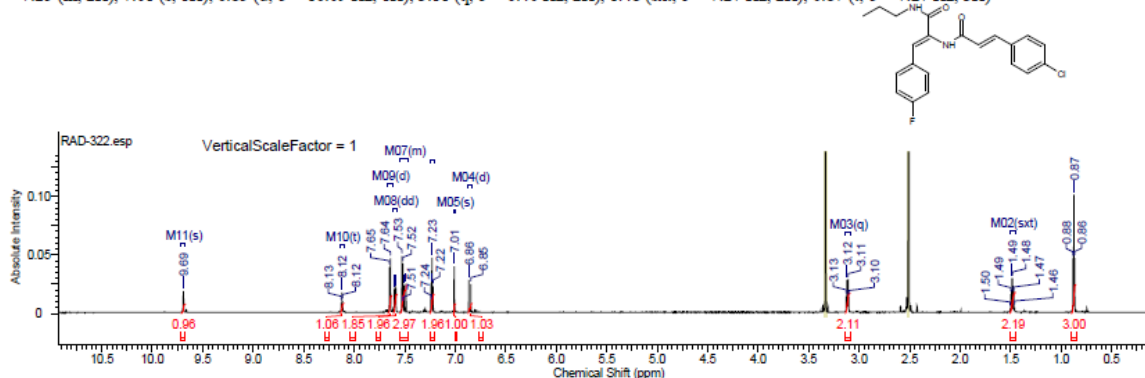

### <sup>13</sup>C NMR

This report was created by ACD/NMR Processor Academic Edition. For more information go to [www.acdlabs.com/nmrproc/](http://www.acdlabs.com/nmrproc/)

### RAD-322

20/09/2016 8:35:42 AM  
Dr.Mustafa Sample : RAD-322 DMSO

|                        |                                                                                                                                         |                        |                                  |
|------------------------|-----------------------------------------------------------------------------------------------------------------------------------------|------------------------|----------------------------------|
| Formula                | C <sub>21</sub> H <sub>19</sub> ClF <sub>2</sub> N <sub>3</sub> O <sub>2</sub>                                                          | FW                     | 386.8471                         |
| Acquisition Time (sec) | 0.6423                                                                                                                                  | Comment                | Dr.Mustafa Sample : RAD-322 DMSO |
| Date Stamp             | 19 Apr 2016 12:53:04                                                                                                                    | Date                   | 19 Apr 2016 12:53:04             |
| File Name              | E:\Projects\Mostafa Alaraby Project\Oxazolone\Oxazolone NMR\NMR final oxazolone\13 CNMR New 18-4-2016\MUSTAFA RAD-322 18-04-2016\150fid | Frequency (MHz)        | 213.77                           |
| Nucleus                | <sup>13</sup> C                                                                                                                         | Number of Transients   | 2384                             |
| Original Points Count  | 32768                                                                                                                                   | Owner                  | nmr                              |
| Receiver Gain          | 186.93                                                                                                                                  | Points Count           | 32768                            |
| SW(cyclical) (Hz)      | 51020.41                                                                                                                                | Solvent                | DMSO-d6                          |
| Spectrum Type          | STANDARD                                                                                                                                | Temperature (degree C) | 25.000                           |
|                        |                                                                                                                                         | Pulse Sequence         | zgpg30                           |
|                        |                                                                                                                                         | Spectrum Offset (Hz)   | 21292.2539                       |

<sup>13</sup>C NMR (214 MHz, DMSO-d<sub>6</sub>) δ 164.9, 164.4, 138.7, 134.3, 133.7, 131.5, 130.9, 130.1, 129.5, 129.2, 125.9, 122.4, 115.6, 115.5, 41.0, 39.8, 39.7, 39.6, 39.4, 39.3, 39.2, 22.4, 11.5

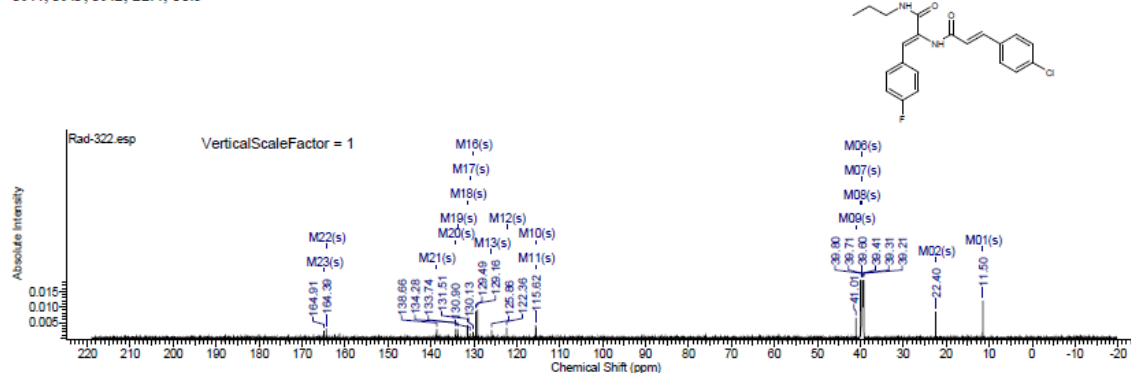

## Spectra of (2412)

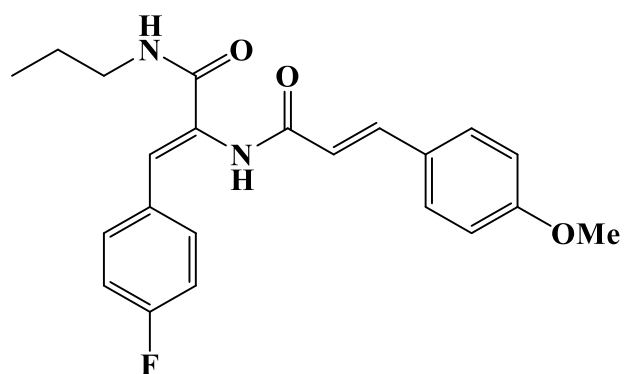

## LC/MS

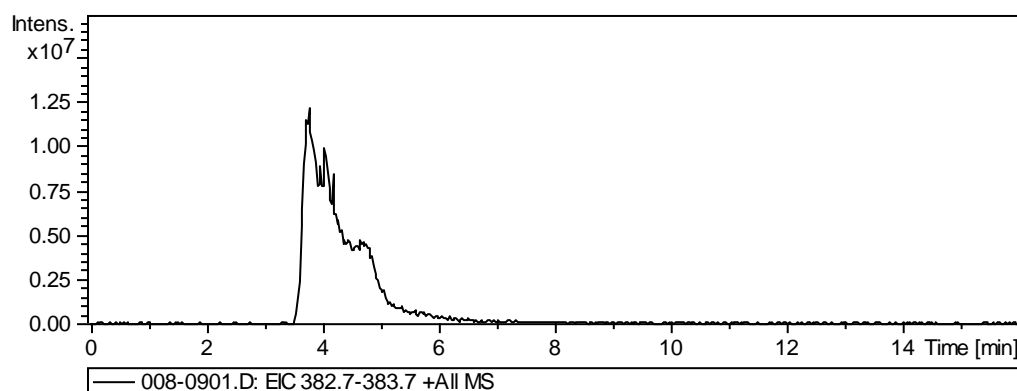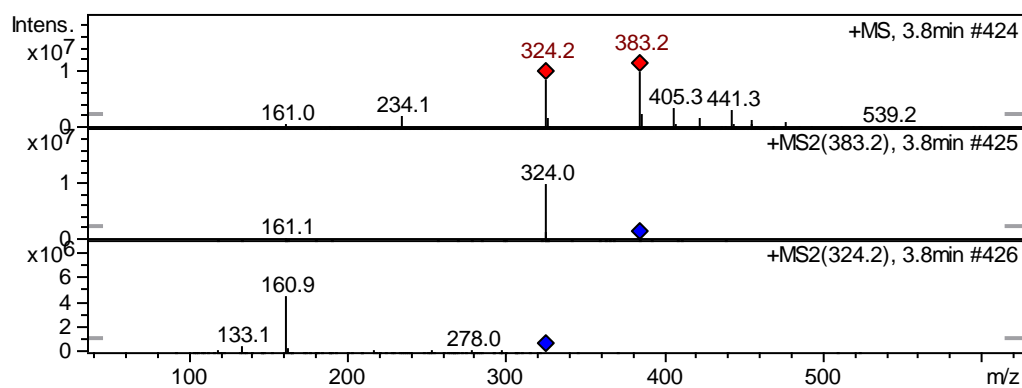

## FT-IR

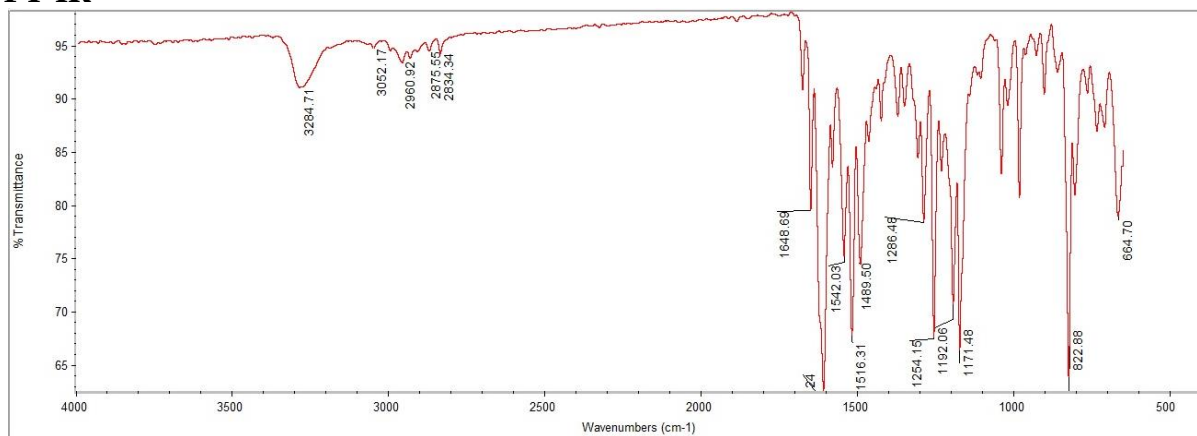

## <sup>1</sup>H NMR

## Supplementary Information

This report was created by ACD/NMR Processor Academic Edition. For more information go to [www.acdlabs.com/nmrproc/](http://www.acdlabs.com/nmrproc/)

## RAD-323

08/11/2016 8:02:57 AM

Dr.Mustafa Sample : RAD-323 DMSO PROTON DMSO (D:Magdy) nmr 28

|                                                                                                                                                                                                                                                                                                                                                                                                                                                                                                                                                                                                                                                                                                                                                                                                                                                                                                                                                                                                                                                                                                                                                                                                                                                                  |                      |                                              |                                                                        |                        |        |         |                                                                        |      |                      |            |                      |           |                    |                                              |                           |        |   |            |    |       |     |              |       |                    |          |         |         |                  |          |                        |        |  |  |                |      |  |  |                      |           |  |  |                  |          |  |  |                 |        |  |  |                       |       |  |  |               |        |
|------------------------------------------------------------------------------------------------------------------------------------------------------------------------------------------------------------------------------------------------------------------------------------------------------------------------------------------------------------------------------------------------------------------------------------------------------------------------------------------------------------------------------------------------------------------------------------------------------------------------------------------------------------------------------------------------------------------------------------------------------------------------------------------------------------------------------------------------------------------------------------------------------------------------------------------------------------------------------------------------------------------------------------------------------------------------------------------------------------------------------------------------------------------------------------------------------------------------------------------------------------------|----------------------|----------------------------------------------|------------------------------------------------------------------------|------------------------|--------|---------|------------------------------------------------------------------------|------|----------------------|------------|----------------------|-----------|--------------------|----------------------------------------------|---------------------------|--------|---|------------|----|-------|-----|--------------|-------|--------------------|----------|---------|---------|------------------|----------|------------------------|--------|--|--|----------------|------|--|--|----------------------|-----------|--|--|------------------|----------|--|--|-----------------|--------|--|--|-----------------------|-------|--|--|---------------|--------|
| Formula C <sub>12</sub> H <sub>18</sub> FN <sub>2</sub> O <sub>4</sub>                                                                                                                                                                                                                                                                                                                                                                                                                                                                                                                                                                                                                                                                                                                                                                                                                                                                                                                                                                                                                                                                                                                                                                                           |                      | FW 382.4280                                  |                                                                        |                        |        |         |                                                                        |      |                      |            |                      |           |                    |                                              |                           |        |   |            |    |       |     |              |       |                    |          |         |         |                  |          |                        |        |  |  |                |      |  |  |                      |           |  |  |                  |          |  |  |                 |        |  |  |                       |       |  |  |               |        |
| <table border="1"> <tr> <td>Acquisition Time (sec)</td> <td>2.6564</td> <td>Comment</td> <td>Dr Mustafa Sample : RAD-323 DMSO PROTON DMSO (D<sub>2</sub>O) nmr 26</td> </tr> <tr> <td>Date</td> <td>18 Jun 2015 15:47:44</td> <td>Date Stamp</td> <td>18 Jun 2015 15:47:44</td> </tr> <tr> <td>File Name</td> <td>1H-Mustafa Alaraby</td> <td>Project/Oxazoline NMR/nmr final oxazoline/MS</td> <td>RAD-323 18-06-2015/10f16f</td> </tr> <tr> <td>Number</td> <td>1</td> <td>Transients</td> <td>32</td> </tr> <tr> <td>Owner</td> <td>nmr</td> <td>Points Count</td> <td>32768</td> </tr> <tr> <td>SW (cyclical) (Hz)</td> <td>12335.63</td> <td>Solvent</td> <td>DMSO-d6</td> </tr> <tr> <td>Sweep Width (Hz)</td> <td>12335.15</td> <td>Temperature (degree C)</td> <td>25.000</td> </tr> <tr> <td></td> <td></td> <td>Pulse Sequence</td> <td>zg30</td> </tr> <tr> <td></td> <td></td> <td>Spectrum Offset (Hz)</td> <td>3709.1750</td> </tr> <tr> <td></td> <td></td> <td>Temperature Type</td> <td>STANDARD</td> </tr> <tr> <td></td> <td></td> <td>Frequency (MHz)</td> <td>600.15</td> </tr> <tr> <td></td> <td></td> <td>Original Points Count</td> <td>32768</td> </tr> <tr> <td></td> <td></td> <td>Receiver Gain</td> <td>128.00</td> </tr> </table> |                      |                                              |                                                                        | Acquisition Time (sec) | 2.6564 | Comment | Dr Mustafa Sample : RAD-323 DMSO PROTON DMSO (D <sub>2</sub> O) nmr 26 | Date | 18 Jun 2015 15:47:44 | Date Stamp | 18 Jun 2015 15:47:44 | File Name | 1H-Mustafa Alaraby | Project/Oxazoline NMR/nmr final oxazoline/MS | RAD-323 18-06-2015/10f16f | Number | 1 | Transients | 32 | Owner | nmr | Points Count | 32768 | SW (cyclical) (Hz) | 12335.63 | Solvent | DMSO-d6 | Sweep Width (Hz) | 12335.15 | Temperature (degree C) | 25.000 |  |  | Pulse Sequence | zg30 |  |  | Spectrum Offset (Hz) | 3709.1750 |  |  | Temperature Type | STANDARD |  |  | Frequency (MHz) | 600.15 |  |  | Original Points Count | 32768 |  |  | Receiver Gain | 128.00 |
| Acquisition Time (sec)                                                                                                                                                                                                                                                                                                                                                                                                                                                                                                                                                                                                                                                                                                                                                                                                                                                                                                                                                                                                                                                                                                                                                                                                                                           | 2.6564               | Comment                                      | Dr Mustafa Sample : RAD-323 DMSO PROTON DMSO (D <sub>2</sub> O) nmr 26 |                        |        |         |                                                                        |      |                      |            |                      |           |                    |                                              |                           |        |   |            |    |       |     |              |       |                    |          |         |         |                  |          |                        |        |  |  |                |      |  |  |                      |           |  |  |                  |          |  |  |                 |        |  |  |                       |       |  |  |               |        |
| Date                                                                                                                                                                                                                                                                                                                                                                                                                                                                                                                                                                                                                                                                                                                                                                                                                                                                                                                                                                                                                                                                                                                                                                                                                                                             | 18 Jun 2015 15:47:44 | Date Stamp                                   | 18 Jun 2015 15:47:44                                                   |                        |        |         |                                                                        |      |                      |            |                      |           |                    |                                              |                           |        |   |            |    |       |     |              |       |                    |          |         |         |                  |          |                        |        |  |  |                |      |  |  |                      |           |  |  |                  |          |  |  |                 |        |  |  |                       |       |  |  |               |        |
| File Name                                                                                                                                                                                                                                                                                                                                                                                                                                                                                                                                                                                                                                                                                                                                                                                                                                                                                                                                                                                                                                                                                                                                                                                                                                                        | 1H-Mustafa Alaraby   | Project/Oxazoline NMR/nmr final oxazoline/MS | RAD-323 18-06-2015/10f16f                                              |                        |        |         |                                                                        |      |                      |            |                      |           |                    |                                              |                           |        |   |            |    |       |     |              |       |                    |          |         |         |                  |          |                        |        |  |  |                |      |  |  |                      |           |  |  |                  |          |  |  |                 |        |  |  |                       |       |  |  |               |        |
| Number                                                                                                                                                                                                                                                                                                                                                                                                                                                                                                                                                                                                                                                                                                                                                                                                                                                                                                                                                                                                                                                                                                                                                                                                                                                           | 1                    | Transients                                   | 32                                                                     |                        |        |         |                                                                        |      |                      |            |                      |           |                    |                                              |                           |        |   |            |    |       |     |              |       |                    |          |         |         |                  |          |                        |        |  |  |                |      |  |  |                      |           |  |  |                  |          |  |  |                 |        |  |  |                       |       |  |  |               |        |
| Owner                                                                                                                                                                                                                                                                                                                                                                                                                                                                                                                                                                                                                                                                                                                                                                                                                                                                                                                                                                                                                                                                                                                                                                                                                                                            | nmr                  | Points Count                                 | 32768                                                                  |                        |        |         |                                                                        |      |                      |            |                      |           |                    |                                              |                           |        |   |            |    |       |     |              |       |                    |          |         |         |                  |          |                        |        |  |  |                |      |  |  |                      |           |  |  |                  |          |  |  |                 |        |  |  |                       |       |  |  |               |        |
| SW (cyclical) (Hz)                                                                                                                                                                                                                                                                                                                                                                                                                                                                                                                                                                                                                                                                                                                                                                                                                                                                                                                                                                                                                                                                                                                                                                                                                                               | 12335.63             | Solvent                                      | DMSO-d6                                                                |                        |        |         |                                                                        |      |                      |            |                      |           |                    |                                              |                           |        |   |            |    |       |     |              |       |                    |          |         |         |                  |          |                        |        |  |  |                |      |  |  |                      |           |  |  |                  |          |  |  |                 |        |  |  |                       |       |  |  |               |        |
| Sweep Width (Hz)                                                                                                                                                                                                                                                                                                                                                                                                                                                                                                                                                                                                                                                                                                                                                                                                                                                                                                                                                                                                                                                                                                                                                                                                                                                 | 12335.15             | Temperature (degree C)                       | 25.000                                                                 |                        |        |         |                                                                        |      |                      |            |                      |           |                    |                                              |                           |        |   |            |    |       |     |              |       |                    |          |         |         |                  |          |                        |        |  |  |                |      |  |  |                      |           |  |  |                  |          |  |  |                 |        |  |  |                       |       |  |  |               |        |
|                                                                                                                                                                                                                                                                                                                                                                                                                                                                                                                                                                                                                                                                                                                                                                                                                                                                                                                                                                                                                                                                                                                                                                                                                                                                  |                      | Pulse Sequence                               | zg30                                                                   |                        |        |         |                                                                        |      |                      |            |                      |           |                    |                                              |                           |        |   |            |    |       |     |              |       |                    |          |         |         |                  |          |                        |        |  |  |                |      |  |  |                      |           |  |  |                  |          |  |  |                 |        |  |  |                       |       |  |  |               |        |
|                                                                                                                                                                                                                                                                                                                                                                                                                                                                                                                                                                                                                                                                                                                                                                                                                                                                                                                                                                                                                                                                                                                                                                                                                                                                  |                      | Spectrum Offset (Hz)                         | 3709.1750                                                              |                        |        |         |                                                                        |      |                      |            |                      |           |                    |                                              |                           |        |   |            |    |       |     |              |       |                    |          |         |         |                  |          |                        |        |  |  |                |      |  |  |                      |           |  |  |                  |          |  |  |                 |        |  |  |                       |       |  |  |               |        |
|                                                                                                                                                                                                                                                                                                                                                                                                                                                                                                                                                                                                                                                                                                                                                                                                                                                                                                                                                                                                                                                                                                                                                                                                                                                                  |                      | Temperature Type                             | STANDARD                                                               |                        |        |         |                                                                        |      |                      |            |                      |           |                    |                                              |                           |        |   |            |    |       |     |              |       |                    |          |         |         |                  |          |                        |        |  |  |                |      |  |  |                      |           |  |  |                  |          |  |  |                 |        |  |  |                       |       |  |  |               |        |
|                                                                                                                                                                                                                                                                                                                                                                                                                                                                                                                                                                                                                                                                                                                                                                                                                                                                                                                                                                                                                                                                                                                                                                                                                                                                  |                      | Frequency (MHz)                              | 600.15                                                                 |                        |        |         |                                                                        |      |                      |            |                      |           |                    |                                              |                           |        |   |            |    |       |     |              |       |                    |          |         |         |                  |          |                        |        |  |  |                |      |  |  |                      |           |  |  |                  |          |  |  |                 |        |  |  |                       |       |  |  |               |        |
|                                                                                                                                                                                                                                                                                                                                                                                                                                                                                                                                                                                                                                                                                                                                                                                                                                                                                                                                                                                                                                                                                                                                                                                                                                                                  |                      | Original Points Count                        | 32768                                                                  |                        |        |         |                                                                        |      |                      |            |                      |           |                    |                                              |                           |        |   |            |    |       |     |              |       |                    |          |         |         |                  |          |                        |        |  |  |                |      |  |  |                      |           |  |  |                  |          |  |  |                 |        |  |  |                       |       |  |  |               |        |
|                                                                                                                                                                                                                                                                                                                                                                                                                                                                                                                                                                                                                                                                                                                                                                                                                                                                                                                                                                                                                                                                                                                                                                                                                                                                  |                      | Receiver Gain                                | 128.00                                                                 |                        |        |         |                                                                        |      |                      |            |                      |           |                    |                                              |                           |        |   |            |    |       |     |              |       |                    |          |         |         |                  |          |                        |        |  |  |                |      |  |  |                      |           |  |  |                  |          |  |  |                 |        |  |  |                       |       |  |  |               |        |

<sup>1</sup>H NMR (600 MHz, DMSO-d<sub>6</sub>) δ 9.61 (s, 1H), 8.12 (t, *J* = 5.65 Hz, 1H), 7.56–7.61 (m, 4H), 7.45 (d, *J* = 15.81 Hz, 1H), 7.20–7.26 (m, 2H), 7.02 (d, *J* = 8.66 Hz, 2H), 6.98 (s, 1H), 6.71 (d, *J* = 15.81 Hz, 1H), 3.81 (s, 3H), 3.11 (q, *J* = 6.65 Hz, 2H), 1.48 (sxt, *J* = 7.30 Hz, 2H), 0.87 (t, *J* = 7.53 Hz, 3H)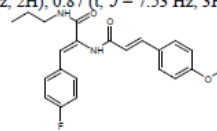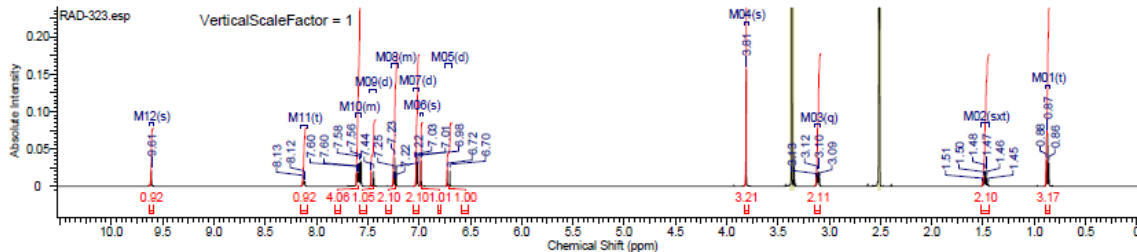

### <sup>13</sup>C NMR

This report was created by ACD/NMR Processor Academic Edition. For more information go to [www.acdlabs.com/nmrproc/](http://www.acdlabs.com/nmrproc/)

## RAD-323

20/09/2016 8:36:09 AM

Dr. Mostafa Sample : RAD-323 DMSO

|                                                                        |                                                                                                                                        |                   |                     |                        |                           |
|------------------------------------------------------------------------|----------------------------------------------------------------------------------------------------------------------------------------|-------------------|---------------------|------------------------|---------------------------|
| Formula C <sub>14</sub> H <sub>18</sub> FN <sub>2</sub> O <sub>4</sub> |                                                                                                                                        | FW 382.4280       |                     |                        |                           |
| Acquisition Time (sec)                                                 | 0.6423                                                                                                                                 | Comment           | Dr Mostafa Sample : | RAD-323 DMSO           | Date 19 Apr 2016 10:15:12 |
| Date Stamp                                                             | 19 Apr 2016 10:15:12                                                                                                                   |                   |                     |                        |                           |
| File Name                                                              | E:\Projects\Mostafa Alaraby Project\Oxazolone\Oxazolone NMR\NMR final oxazolone\13 CHMR New 18-4-2016\MUSTAFA_RAD-323_18-04-2016\11fid |                   |                     |                        |                           |
| Chemical Shift (MHz)                                                   | 213.77                                                                                                                                 | Nucleus           | <sup>13</sup> C     | Number of Transients   | Origin                    |
| Original Points Count                                                  | 32768                                                                                                                                  | Owner             | nmr                 | Points Count           | 32768                     |
| Receiver Gain                                                          | 186.93                                                                                                                                 | SW(cyclical) (Hz) | 51020.41            | Solvent                | DMSO-d6                   |
| Spectrum Type                                                          | STANDARD                                                                                                                               | Sweep Width (Hz)  | 51018.85            | Temperature (degree C) | 24.099                    |
|                                                                        |                                                                                                                                        |                   |                     | Pulse Sequence         | zgpg30                    |
|                                                                        |                                                                                                                                        |                   |                     | Spectrum Offset (Hz)   | 21295.3691                |

<sup>13</sup>C NMR (214 MHz, DMSO-d<sub>6</sub>) δ 165.1, 164.9, 160.7, 139.9, 131.5, 131.0, 130.4, 129.5, 127.3, 125.6, 119.0, 115.6, 115.5, 114.6, 55.4, 41.0, 39.8, 39.7, 39.6, 39.4, 39.3, 39.2, 22.4, 11.5.

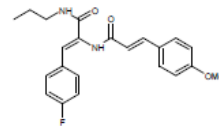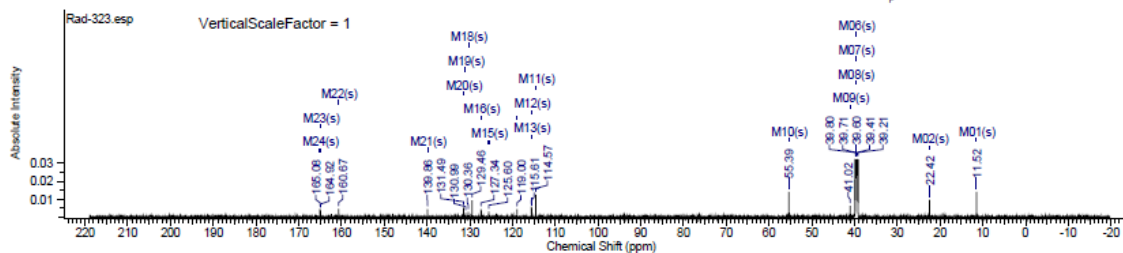

## Spectra of (2512)

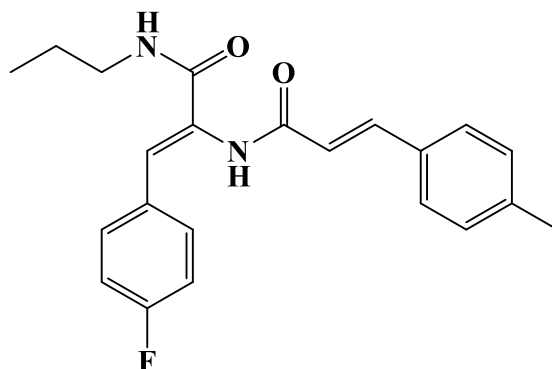

## LC/MS

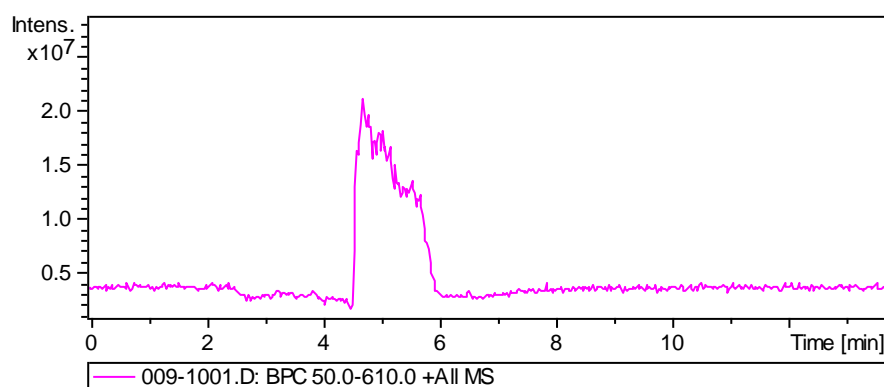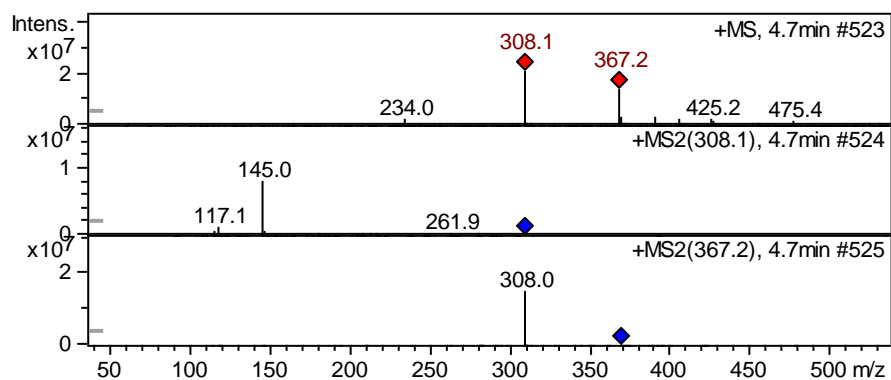

## FT-IR

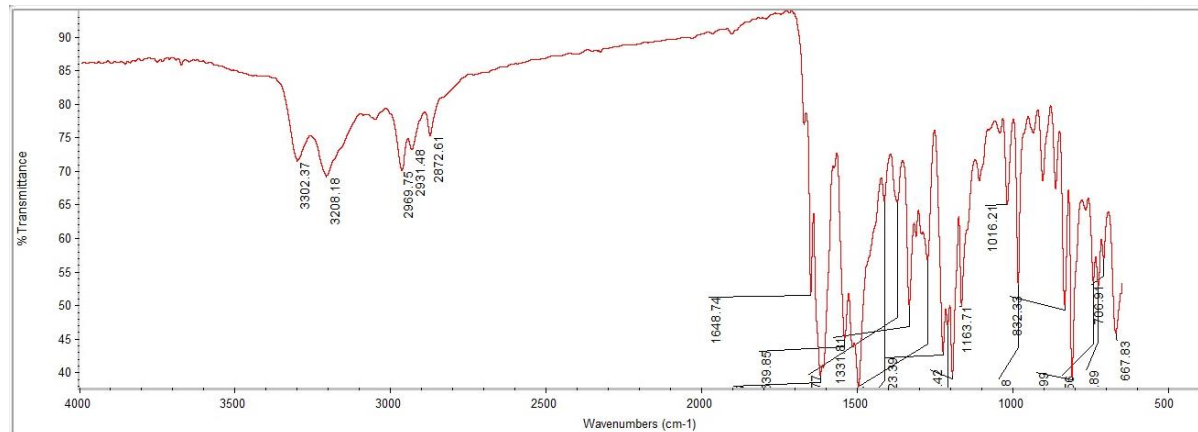



<sup>1</sup>H NMRThis report was created by ACD/NMR Processor Academic Edition. For more information go to [www.acdlabs.com/nmrproc/](http://www.acdlabs.com/nmrproc/)

## RAD-324

08/11/2016 8:11:51 AM  
Dr. Mustafa El-Araby Sample : RAD-324 DMSO

|                        |                                                                                                 |                        |                                            |
|------------------------|-------------------------------------------------------------------------------------------------|------------------------|--------------------------------------------|
| Formula                | C <sub>22</sub> H <sub>20</sub> FN <sub>2</sub> O <sub>2</sub>                                  | FW                     | 366.4286                                   |
| Acquisition Time (sec) | 1.9268                                                                                          | Comment                | Dr. Mustafa El-Araby Sample : RAD-324 DMSO |
| Date Stamp             | 08 Apr 2015 11:21:20                                                                            | Date                   | 08 Apr 2015 11:21:20                       |
| File Name              | E:\Mostafa Alaraby Project\Oxazolone NMR\NMR final oxazolone\MUSTAFA RAD-324 08-04-2015\170.fid | Frequency (MHz)        | 850.15                                     |
| Nucleus                | 1H                                                                                              | Number of Transients   | 20                                         |
| Owner                  | nmr                                                                                             | Points Count           | 32768                                      |
| SW (cyclical) (Hz)     | 17008.80                                                                                        | Pulse Sequence         | zg30                                       |
| Sweep Width (Hz)       | 17008.28                                                                                        | Solvent                | DMSO-d6                                    |
|                        |                                                                                                 | Spectrum Offset (Hz)   | 5250.0283                                  |
|                        |                                                                                                 | Receiver Gain          | 9.04                                       |
|                        |                                                                                                 | Temperature (degree C) | 25.001                                     |
|                        |                                                                                                 | Spectrum Type          | STANDARD                                   |

<sup>1</sup>H NMR (850 MHz, DMSO-d<sub>6</sub>) δ 9.64 (s, 1H), 8.11 (t, *J* = 5.71 Hz, 1H), 7.60 (dd, *J* = 5.71, 8.82 Hz, 2H), 7.48 - 7.53 (m, *J* = 7.78 Hz, 2H), 7.46 (d, *J* = 16.09 Hz, 1H), 7.25 - 7.28 (m, *J* = 8.30 Hz, 2H), 7.20 - 7.25 (m, 2H), 7.00 (s, 1H), 6.81 (d, *J* = 15.57 Hz, 1H), 3.12 (q, *J* = 6.75 Hz, 2H), 2.35 (s, 3H), 1.48 (sxt, *J* = 7.27 Hz, 2H), 0.87 (t, *J* = 7.27 Hz, 3H)

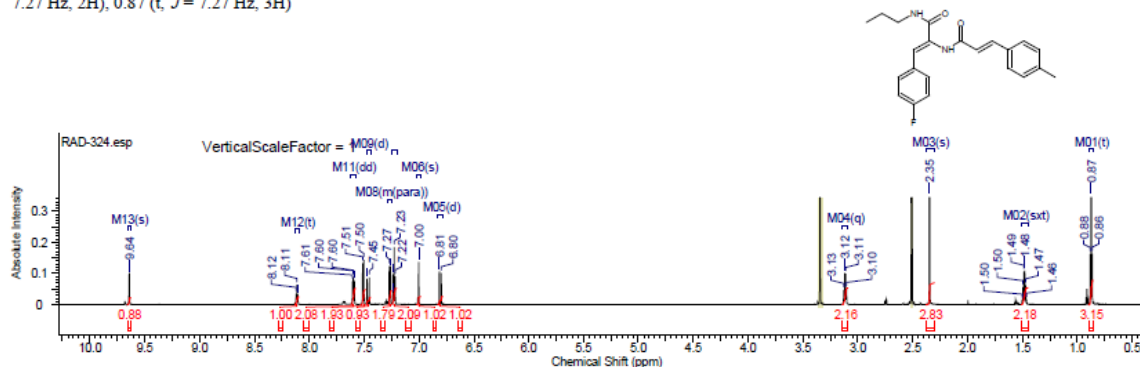<sup>13</sup>C NMRThis report was created by ACD/NMR Processor Academic Edition. For more information go to [www.acdlabs.com/nmrproc/](http://www.acdlabs.com/nmrproc/)

## RAD-324

20/09/2016 8:36:44 AM  
Dr. Mostafa Sample : RAD-324 DMSO

|                        |                                                                                                                                         |                        |                                   |
|------------------------|-----------------------------------------------------------------------------------------------------------------------------------------|------------------------|-----------------------------------|
| Formula                | C <sub>22</sub> H <sub>20</sub> FN <sub>2</sub> O <sub>2</sub>                                                                          | FW                     | 366.4286                          |
| Acquisition Time (sec) | 0.6423                                                                                                                                  | Comment                | Dr. Mostafa Sample : RAD-324 DMSO |
| Date Stamp             | 18 Apr 2016 12:12:32                                                                                                                    | Date                   | 18 Apr 2016 12:12:32              |
| File Name              | E:\Projects\Mostafa Alaraby Project\Oxazolone\Oxazolone NMR\NMR final oxazolone\13 CNMR New 18-4-2016\MUSTAFA RAD-324 18-04-2016\10.fid | Frequency (MHz)        | 213.77                            |
| Nucleus                | 13C                                                                                                                                     | Number of Transients   | 1464                              |
| Original Points Count  | 32768                                                                                                                                   | Points Count           | 32768                             |
| Receiver Gain          | 188.93                                                                                                                                  | Pulse Sequence         | zgpg30                            |
| SW (cyclical) (Hz)     | 51020.41                                                                                                                                | Solvent                | DMSO-d6                           |
| Spectrum Type          | STANDARD                                                                                                                                | Spectrum Offset (Hz)   | 21293.8125                        |
|                        |                                                                                                                                         | Temperature (degree C) | 25.002                            |

<sup>13</sup>C NMR (214 MHz, DMSO-d<sub>6</sub>) δ 165.0, 164.8, 140.0, 139.7, 132.0, 131.5, 131.0, 130.3, 129.7, 127.8, 125.7, 120.5, 115.6, 115.5, 41.0, 39.8, 39.7, 39.6, 39.4, 39.3, 39.2, 22.4, 21.1, 11.5

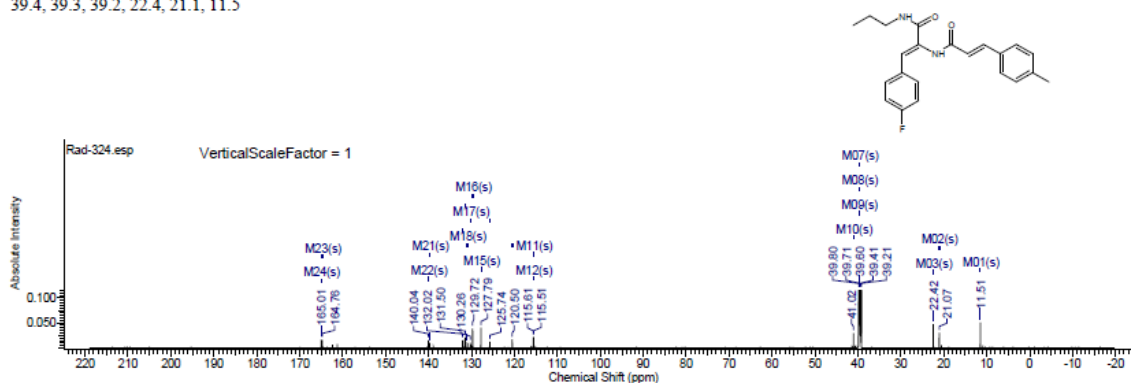

## Spectra of (2612)

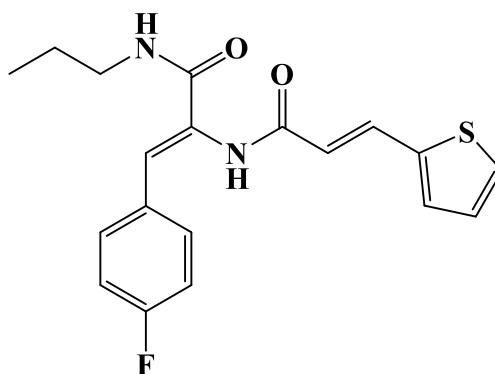

## LC/MS

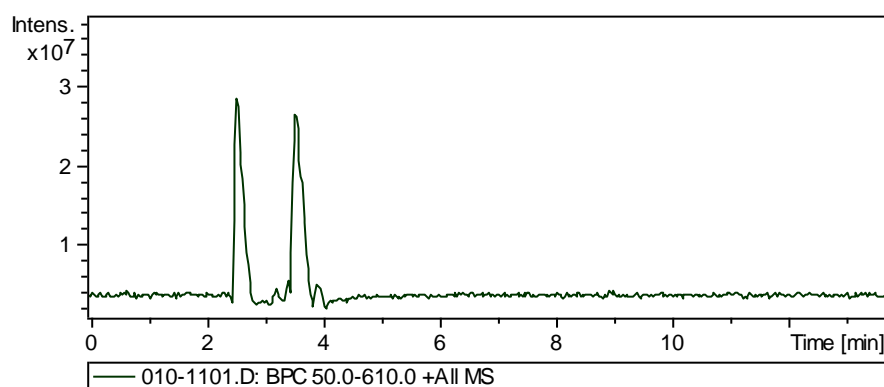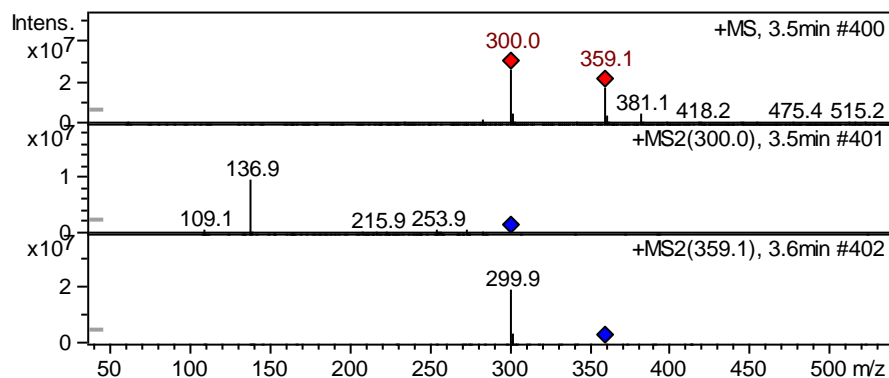

## FT-IR

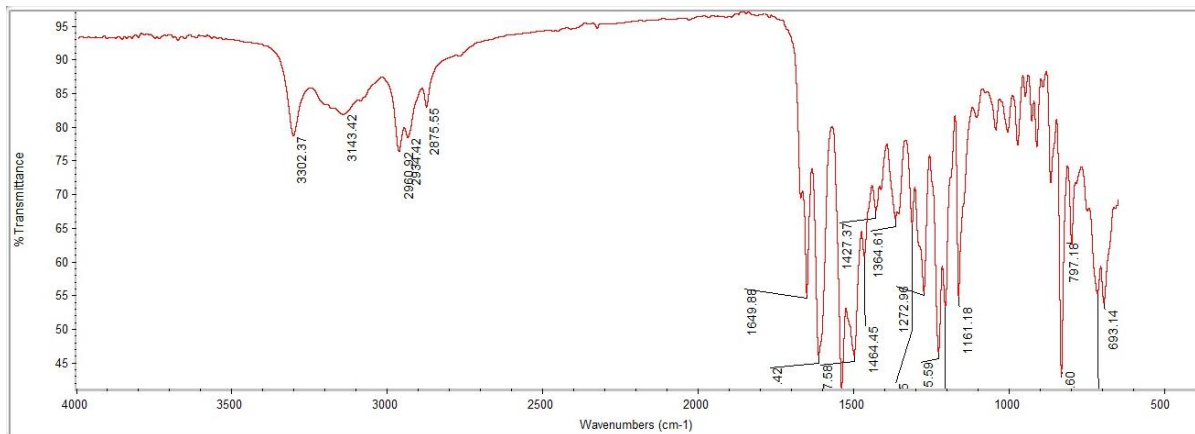<sup>1</sup>H NMR

# Supplementary Information

This report was created by ACD/NMR Processor Academic Edition. For more information go to [www.acdlabs.com/nmrproc/](http://www.acdlabs.com/nmrproc/)

## RAD-325

18/02/2017 10:53:56 AM  
Dr.Mostafa Sample : RAD-325 DMSO

|                        |                                                                                                     |                        |                                  |
|------------------------|-----------------------------------------------------------------------------------------------------|------------------------|----------------------------------|
| Formula                | C <sub>18</sub> H <sub>17</sub> FN <sub>3</sub> O <sub>3</sub> S                                    | FW                     | 358.4298                         |
| Acquisition Time (sec) | 1.9268                                                                                              | Comment                | Dr.Mostafa Sample : RAD-325 DMSO |
| Date Stamp             | 14 Feb 2017 12:38:08                                                                                | Date                   | 14 Feb 2017 12:38:08             |
| File Name              | E:\Projects\Mostafa Alaraby Project\Oxazolone\Rad 355 new amine\MOSTAFA RAD-325 14-02-2017\20170214 | Frequency (MHz)        | 650.15                           |
| Nucleus                | <sup>1</sup> H                                                                                      | Number of Transients   | 64                               |
| Owner                  | nmr                                                                                                 | Points Count           | 32768                            |
| SW (Hz)                | 17006.80                                                                                            | Pulse Sequence         | zgpg30                           |
| Solvent                | DMSO-d <sub>6</sub>                                                                                 | Receiver Gain          | 10.55                            |
| Spectrum Offset (Hz)   | 5250.0283                                                                                           | Spectrum Type          | STANDARD                         |
| Sweep Width (Hz)       | 17006.28                                                                                            | Temperature (degree C) | 25.001                           |

<sup>1</sup>H NMR (850 MHz, DMSO-d<sub>6</sub>) δ 9.63 (s, 1H), 8.11 (t, J = 5.71 Hz, 1H), 7.61 - 7.68 (m, 2H), 7.58 (dd, J = 5.97, 8.04 Hz, 2H), 7.43 (d, J = 3.11 Hz, 1H), 7.23 (t, J = 8.56 Hz, 2H), 7.11 - 7.16 (m, 1H), 7.00 (s, 1H), 6.60 (d, J = 15.57 Hz, 1H), 3.11 (q, J = 6.40 Hz, 2H), 1.48 (sxt, J = 7.27 Hz, 2H), 0.87 (t, J = 7.53 Hz, 3H)

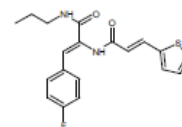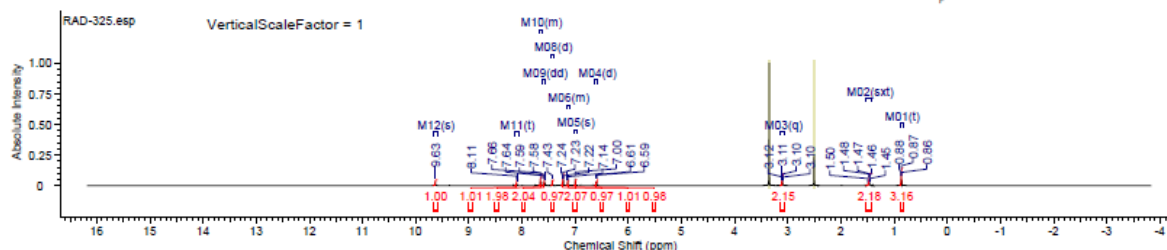

## <sup>13</sup>C NMR

This report was created by ACD/NMR Processor Academic Edition. For more information go to [www.acdlabs.com/nmrproc/](http://www.acdlabs.com/nmrproc/)

## RAD-325

25/09/2016 2:04:21 PM  
Dr.Mostafa Sample : RAD-325 DMSO

|                        |                                                                                                                                         |                      |                                  |
|------------------------|-----------------------------------------------------------------------------------------------------------------------------------------|----------------------|----------------------------------|
| Formula                | C <sub>18</sub> H <sub>17</sub> FN <sub>3</sub> O <sub>3</sub> S                                                                        | FW                   | 358.4298                         |
| Acquisition Time (sec) | 0.6423                                                                                                                                  | Comment              | Dr.Mostafa Sample : RAD-325 DMSO |
| Date Stamp             | 19 Apr 2016 09:47:28                                                                                                                    | Date                 | 19 Apr 2016 09:47:28             |
| File Name              | E:\Projects\Mostafa Alaraby Project\Oxazolone\Oxazolone NMR\NMR final oxazolone\13 CNMR New 18-4-2016\MUSTAFA RAD-325 18-04-2016\10016d | Frequency (MHz)      | 125.77                           |
| Nucleus                | <sup>13</sup> C                                                                                                                         | Number of Transients | 1930                             |
| Original Points Count  | 32768                                                                                                                                   | Owner                | nmr                              |
| Points Count           | 32768                                                                                                                                   | Pulse Sequence       | zgpg30                           |
| Receiver Gain          | 188.93                                                                                                                                  | SW (Hz)              | 51020.41                         |
| Solvent                | DMSO-d <sub>6</sub>                                                                                                                     | Spectrum Offset (Hz) | 21288.4824                       |
| Spectrum Type          | STANDARD                                                                                                                                | Sweep Width (Hz)     | 51018.85                         |
| Temperature (degree C) | 25.000                                                                                                                                  |                      |                                  |

<sup>13</sup>C NMR (214 MHz, DMSO-d<sub>6</sub>) δ 165.0, 164.4, 139.8, 133.1, 131.6, 131.5, 131.4, 130.9, 130.2, 128.6, 128.5, 126.3, 125.9, 120.3, 41.0, 39.8, 39.7, 39.6, 39.4, 39.3, 39.2, 22.4, 11.5

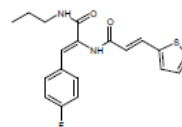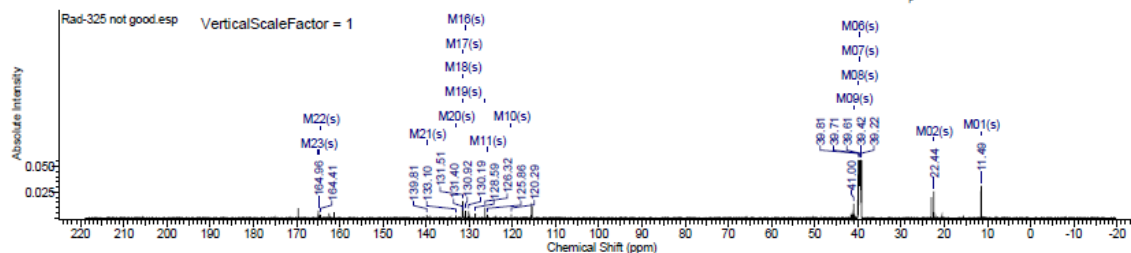

## Spectra of (2712)

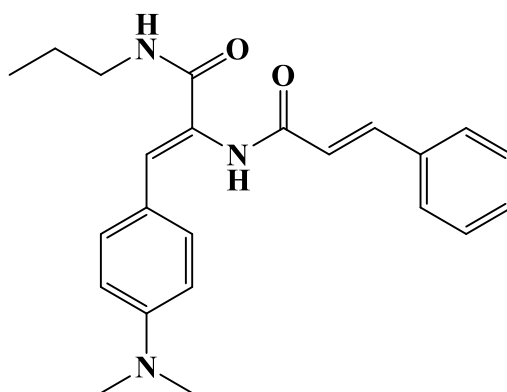

## LC/MS

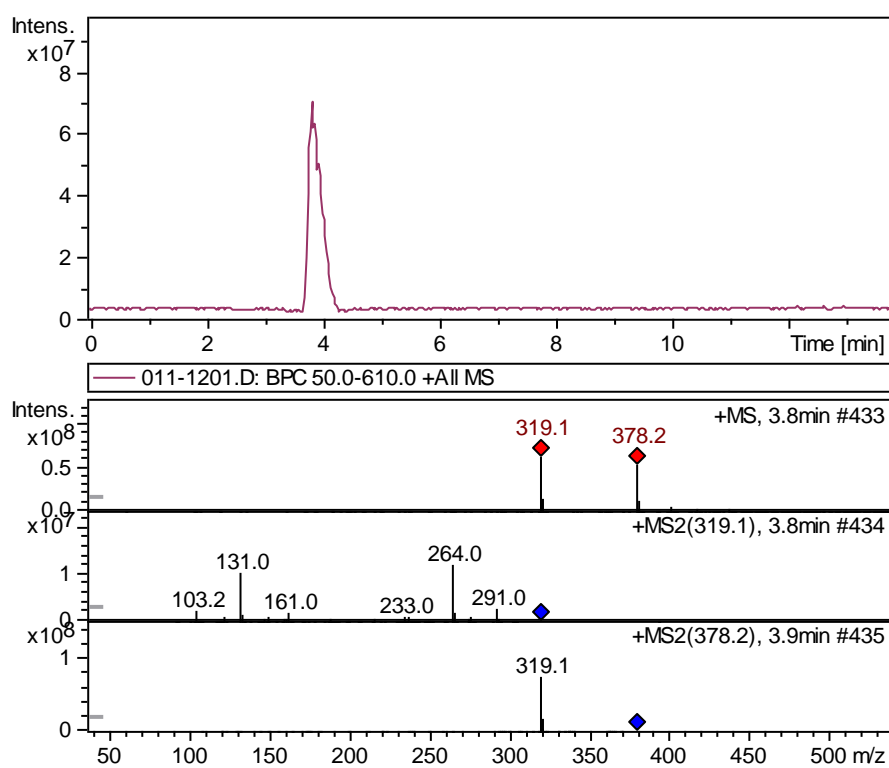

## FT-IR

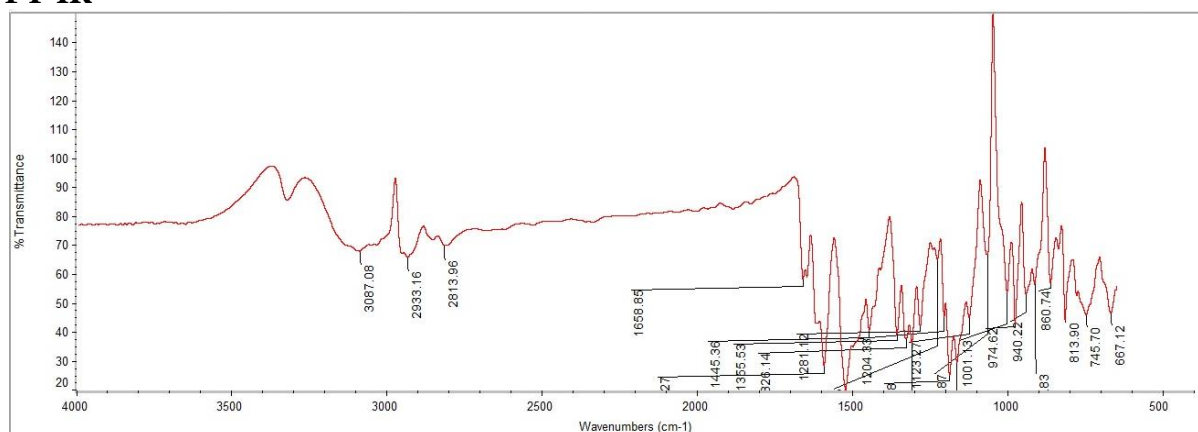

# Supplementary Information

## <sup>1</sup>H NMR

This report was created by ACD/NMR Processor Academic Edition. For more information go to [www.acdlabs.com/nmrproc/](http://www.acdlabs.com/nmrproc/)

### RAD-331

08/11/2016 8:20:31 AM  
Dr. Mustafa Sample : RAD-331 DMSO PROTON DMSO (D:Magdy) nmr 34

|                                                                       |                                                                                                |                        |                                                                |
|-----------------------------------------------------------------------|------------------------------------------------------------------------------------------------|------------------------|----------------------------------------------------------------|
| Formula C <sub>21</sub> H <sub>24</sub> N <sub>2</sub> O <sub>2</sub> | FW                                                                                             | 377.4794               |                                                                |
| Acquisition Time (sec)                                                | 2.6564                                                                                         | Comment                | Dr. Mustafa Sample : RAD-331 DMSO PROTON DMSO (D:Magdy) nmr 34 |
| Date                                                                  | 18 Jun 2015 16:30:24                                                                           | Date Stamp             | 18 Jun 2015 16:30:24                                           |
| File Name                                                             | E:\Mostafa Alaraby Project\Oxazolone NMR\NMR final oxazolone\MUSTAFA RAD-331 18-06-2015\10.fid |                        |                                                                |
| Nucleus                                                               | 1H                                                                                             | Number of Transients   | 32                                                             |
| Owner                                                                 | nmr                                                                                            | Points Count           | 32768                                                          |
| SW (cyclical) (Hz)                                                    | 12335.53                                                                                       | Pulse Sequence         | zg30                                                           |
| SW (Hz)                                                               | 12335.15                                                                                       | Solvent                | DMSO-d6                                                        |
| Sweep Width (Hz)                                                      | 12335.53                                                                                       | Spectrum Offset (Hz)   | 3706.1750                                                      |
|                                                                       |                                                                                                | Temperature (degree C) | 25.000                                                         |
|                                                                       |                                                                                                | Receiver Gain          | 128.00                                                         |
|                                                                       |                                                                                                | Spectrum Type          | STANDARD                                                       |

<sup>1</sup>H NMR (600 MHz, DMSO-d<sub>6</sub>) δ 9.51 (s, 1H), 7.91 (t, J = 5.84 Hz, 1H), 7.63 (d, J = 7.15 Hz, 2H), 7.45 - 7.52 (m, 3H), 7.40 - 7.44 (m, 3H), 7.04 (s, 1H), 6.90 (d, J = 15.81 Hz, 1H), 6.70 (d, J = 9.03 Hz, 2H), 3.07 - 3.14 (m, 2H), 2.92 (s, 6H), 1.46 (sxt, J = 7.23 Hz, 2H), 0.86 (t, J = 7.34 Hz, 3H)

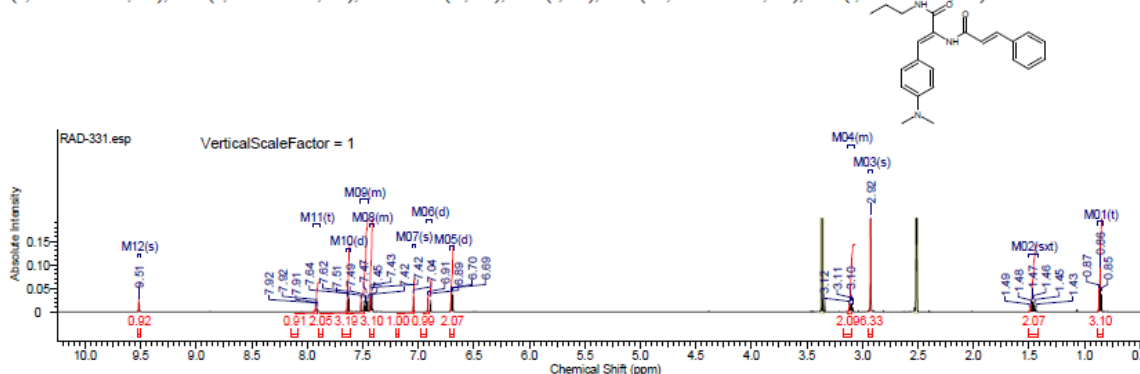

## <sup>13</sup>C NMR

This report was created by ACD/NMR Processor Academic Edition. For more information go to [www.acdlabs.com/nmrproc/](http://www.acdlabs.com/nmrproc/)

### RAD-331

25/09/2016 2:12:54 PM  
Dr. Mustafa Sample : RAD-331 DMSO

|                                                                       |                                                                                                                       |                    |                                  |                        |         |                      |            |
|-----------------------------------------------------------------------|-----------------------------------------------------------------------------------------------------------------------|--------------------|----------------------------------|------------------------|---------|----------------------|------------|
| Formula C <sub>21</sub> H <sub>24</sub> N <sub>2</sub> O <sub>2</sub> | FW                                                                                                                    | 377.4794           |                                  |                        |         |                      |            |
| Acquisition Time (sec)                                                | 0.6423                                                                                                                | Comment            | Dr Mostafa Sample : RAD-331 DMSO |                        | Date    | 20 Apr 2016 10:49:20 |            |
| Date Stamp                                                            | 20 Apr 2016 10:49:20                                                                                                  |                    |                                  |                        |         |                      |            |
| File Name                                                             | E:\Projects\Mostafa Alaraby Project\Oxazolone\Oxazolone NMR\NMR final oxazolone\13 CNMR New 18-4-2016\MUSTAFA RAD-331 |                    |                                  |                        |         | 18-04-2016\100fhd    |            |
| Frequency (MHz)                                                       | 213.77                                                                                                                | Nucleus            | 13C                              | Number of Transients   | 3007    | Origin               | spect      |
| Original Points Count                                                 | 32768                                                                                                                 | Owner              | nmr                              | Points Count           | 32768   | Pulse Sequence       | zgpg30     |
| Receiver Gain                                                         | 128.93                                                                                                                | SW (cyclical) (Hz) | 51020.41                         | Solvent                | DMSO-d6 | Spectrum Offset (Hz) | 21320.2813 |
| Spectrum Type                                                         | STANDARD                                                                                                              | Sweep Width (Hz)   | 51018.85                         | Temperature (degree C) | 24.999  |                      |            |

<sup>13</sup>C NMR (214 MHz, DMSO-d<sub>6</sub>) δ 169.6, 168.0, 142.5, 141.1, 135.8, 134.7, 131.2, 129.3, 129.0, 128.7, 128.1, 127.5, 126.3, 111.0, 41.6, 40.7, 39.8, 39.7, 39.6, 39.4, 39.3, 39.2, 22.3, 11.4

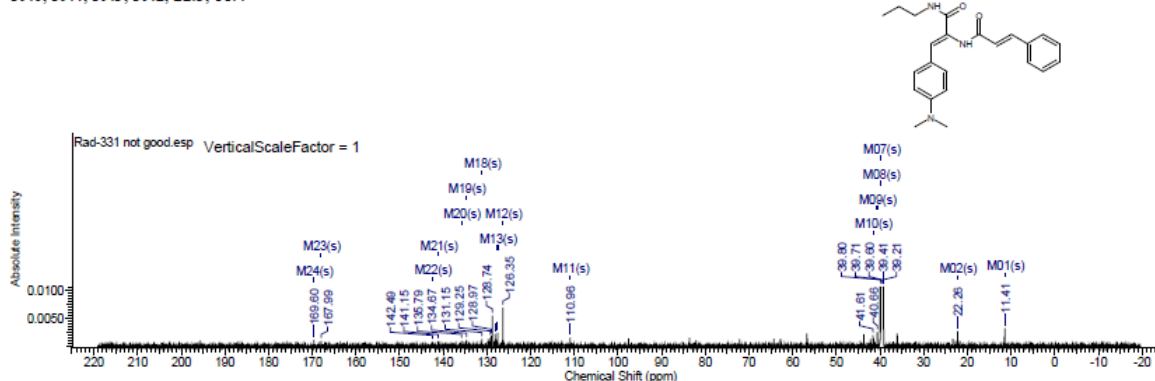

## Spectra of (2812)

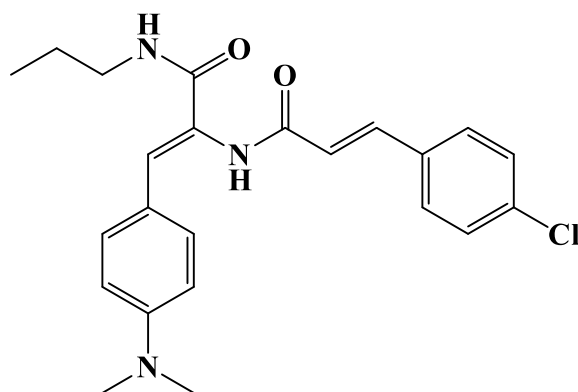

## LC/MS

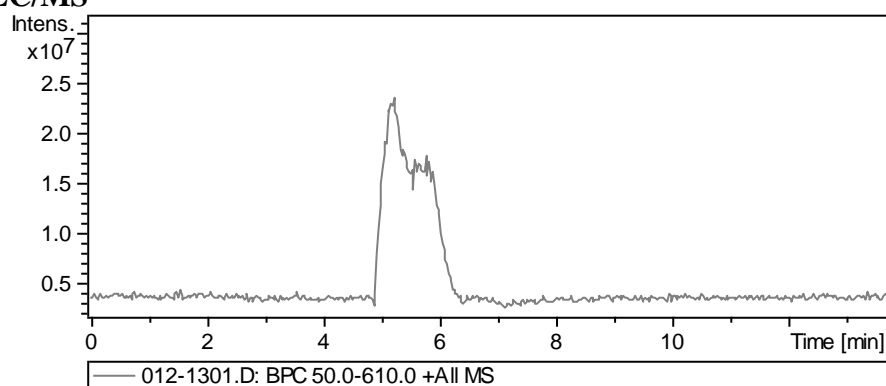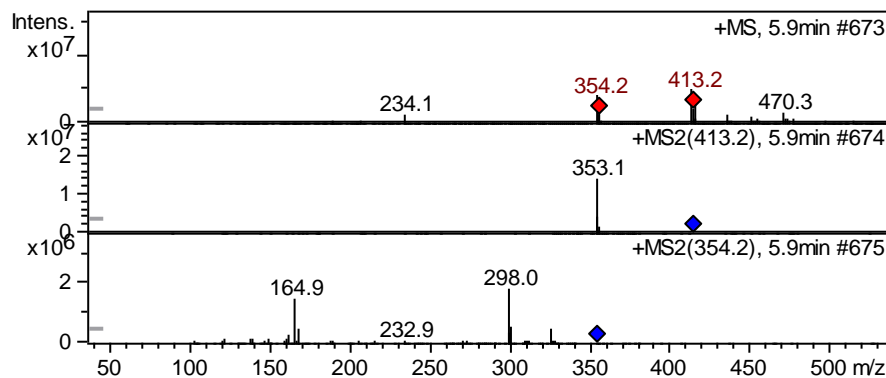

## FT-IR

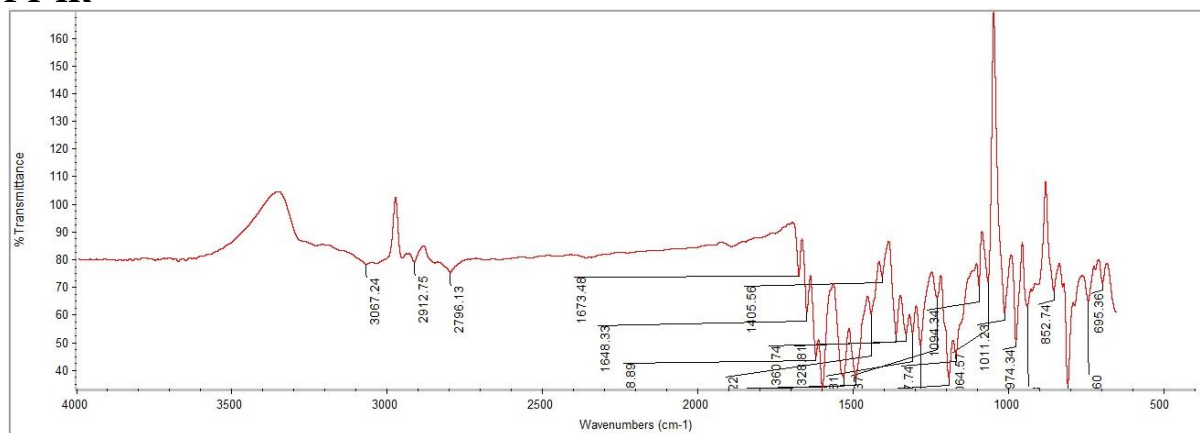

# Supplementary Information

## <sup>1</sup>H NMR

This report was created by ACD/NMR Processor Academic Edition. For more information go to [www.acdlabs.com/nmrproc/](http://www.acdlabs.com/nmrproc/)

### RAD-332

08/11/2016 8:27:20 AM  
Dr. Mustafa Sample : RAD-332 DMSO PROTON DMSO (D<sub>2</sub>O) nmr 15

|                                                                                                         |                                                                                 |
|---------------------------------------------------------------------------------------------------------|---------------------------------------------------------------------------------|
| Formula C <sub>22</sub> H <sub>26</sub> ClN <sub>2</sub> O <sub>2</sub>                                 | FW 411.9244                                                                     |
| Acquisition Time (sec) 2.6564                                                                           | Comment Dr. Mustafa Sample : RAD-332 DMSO PROTON DMSO (D <sub>2</sub> O) nmr 15 |
| Date 18 Jun 2015 14:52:16                                                                               | Date Stamp 18 Jun 2015 14:52:16                                                 |
| File Name E:\Mostafa Alaraby Project\Oxazolone NMR\NMR final oxazolone\MUSTAFA_RAD-332_18-06-2015\10fid | Frequency (MHz) 600.15                                                          |
| Nucleus 1H                                                                                              | Number of Transients 32                                                         |
| Owner nmr                                                                                               | Points Count 32768                                                              |
| SW(cyclical) (Hz) 12335.53                                                                              | Pulse Sequence zg30                                                             |
| Sweep Width (Hz) 12335.15                                                                               | Solvent DMSO-d6                                                                 |
|                                                                                                         | Spectrum Offset (Hz) 3708.1750                                                  |
|                                                                                                         | Receiver Gain 128.00                                                            |
|                                                                                                         | Spectrum Type STANDARD                                                          |

<sup>1</sup>H NMR (600 MHz, DMSO-d<sub>6</sub>) δ 9.53 (s, 1H), 7.92 (t, J = 6.02 Hz, 1H), 7.63 - 7.68 (m, J = 8.66 Hz, 2H), 7.52 - 7.55 (m, J = 8.28 Hz, 2H), 7.50 (d, J = 15.81 Hz, 1H), 7.39 - 7.44 (m, J = 9.03 Hz, 2H), 7.04 (s, 1H), 6.90 (d, J = 15.81 Hz, 1H), 6.67 - 6.72 (m, J = 9.03 Hz, 2H), 3.10 (q, J = 6.40 Hz, 2H), 2.93 (s, 6H), 1.46 (sxt, J = 7.23 Hz, 2H), 0.86 (t, J = 7.34 Hz, 3H)

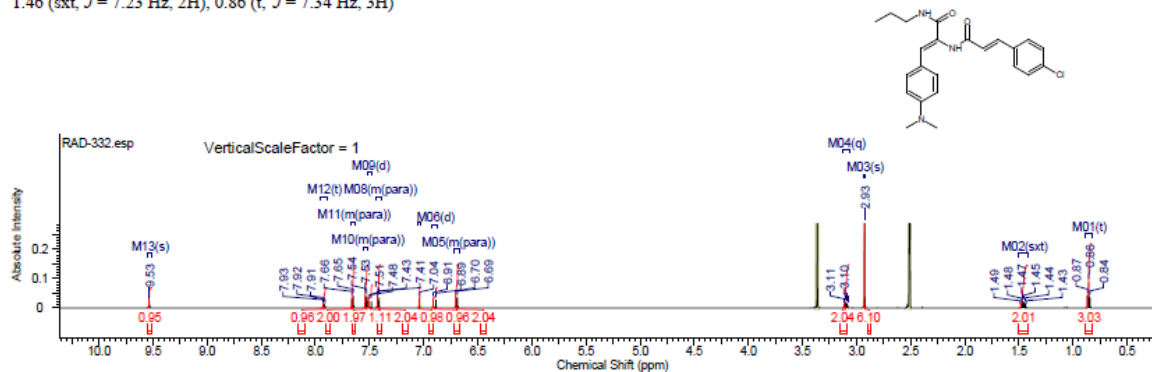

## <sup>13</sup>C NMR

This report was created by ACD/NMR Processor Academic Edition. For more information go to [www.acdlabs.com/nmrproc/](http://www.acdlabs.com/nmrproc/)

### RAD-332

25/09/2016 3:09:37 PM  
Dr. Mustafa Sample : RAD-332 DMSO

|                                                                                                                                                  |                                           |
|--------------------------------------------------------------------------------------------------------------------------------------------------|-------------------------------------------|
| Formula C <sub>22</sub> H <sub>26</sub> ClN <sub>2</sub> O <sub>2</sub>                                                                          | FW 411.9244                               |
| Acquisition Time (sec) 0.6423                                                                                                                    | Comment Dr. Mustafa Sample : RAD-332 DMSO |
| Date Stamp 20 Apr 2016 07:13:52                                                                                                                  | Date 20 Apr 2016 07:13:52                 |
| File Name E:\Projects\Mostafa Alaraby Project\Oxazolone\Oxazolone NMR\NMR final oxazolone\13 CNMR New 18-4-2016\MUSTAFA_RAD-332_19-04-2016\70fid | Frequency (MHz) 125.77                    |
| Nucleus 13C                                                                                                                                      | Number of Transients 3500                 |
| Original Points Count 32768                                                                                                                      | Points Count 32768                        |
| Receiver Gain 186.93                                                                                                                             | Pulse Sequence zgpg30                     |
| SW(cyclical) (Hz) 51020.41                                                                                                                       | Solvent DMSO-d6                           |
| Spectrum Type STANDARD                                                                                                                           | Spectrum Offset (Hz) 21286.0273           |
|                                                                                                                                                  | Temperature (degree C) 25.001             |

<sup>13</sup>C NMR (125 MHz, DMSO-d<sub>6</sub>) δ 166.5, 163.1, 140.1, 137.9, 134.6, 133.4, 131.2, 129.4, 129.3, 128.8, 128.6, 128.2, 127.8, 127.5, 41.3, 40.5, 39.8, 39.7, 39.6, 39.4, 39.3, 39.2, 22.4, 11.4

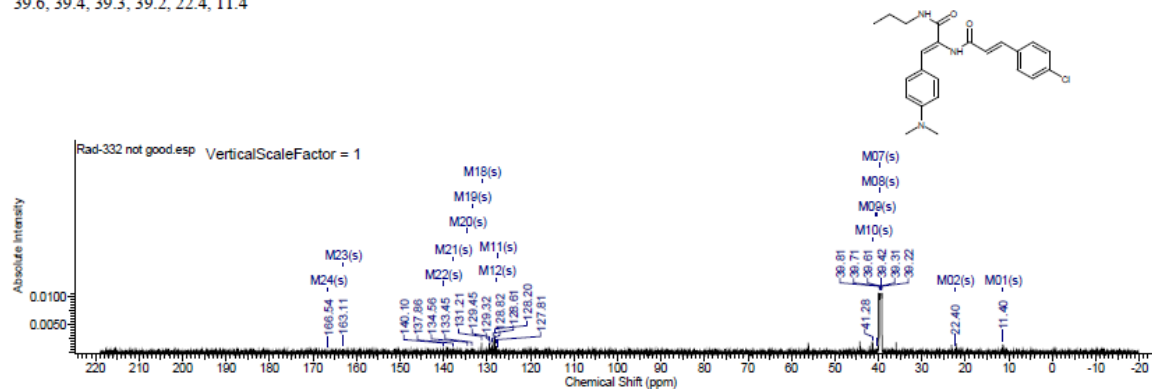

## Spectra of (2912)

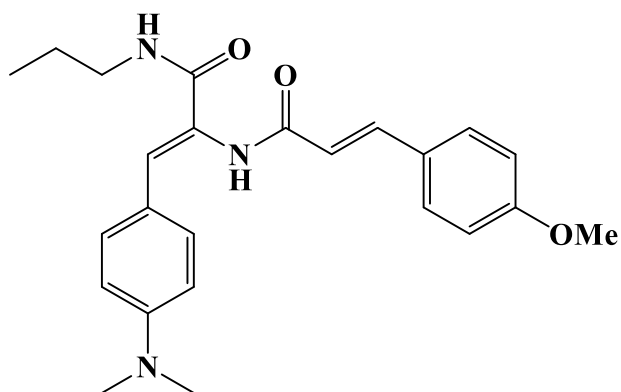

## LC/MS

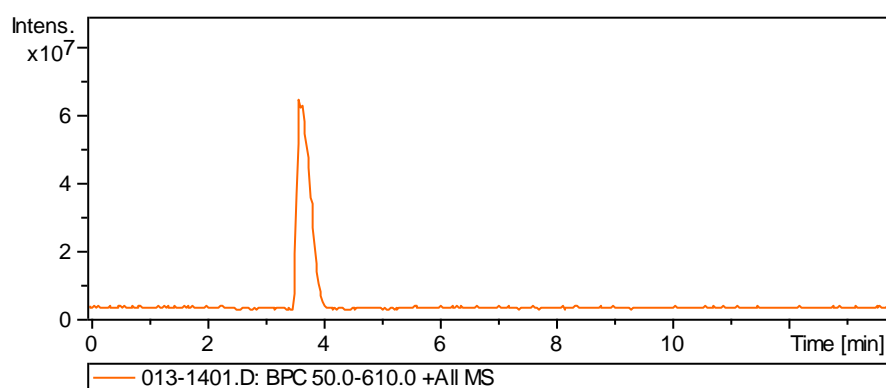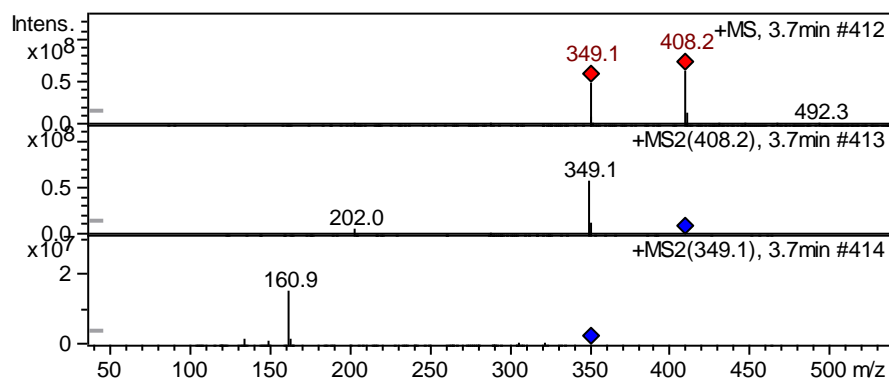

## FT-IR

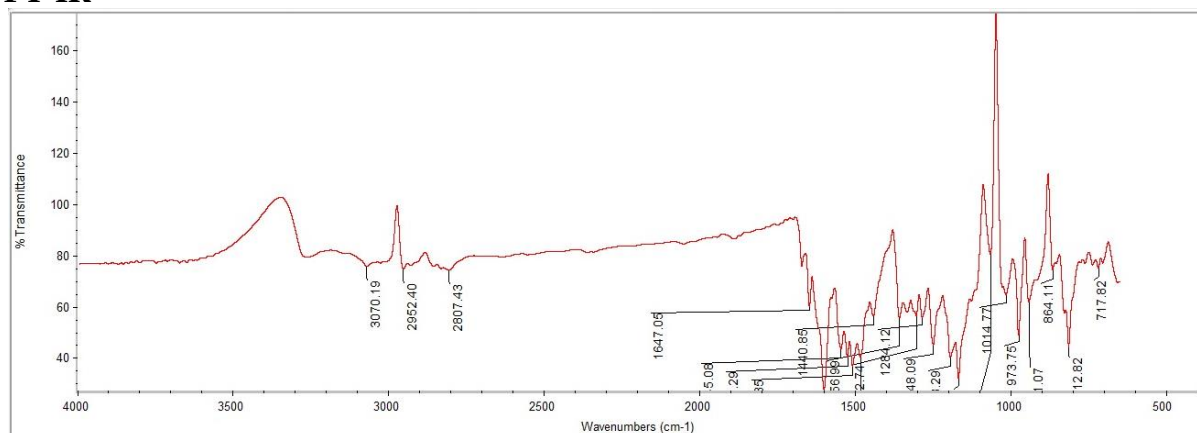



# Supplementary Information

## <sup>1</sup>H NMR

This report was created by ACD/NMR Processor Academic Edition. For more information go to [www.acdlabs.com/nmrproc/](http://www.acdlabs.com/nmrproc/)

### RAD-333

08/11/2016 8:30:41 AM  
Dr. Mustafa Sample : RAD-333 DMSO PROTON DMSO (D<sub>2</sub>O) nmr 18

|                                                                       |  |                                                                                               |                                                                         |           |
|-----------------------------------------------------------------------|--|-----------------------------------------------------------------------------------------------|-------------------------------------------------------------------------|-----------|
| Formula C <sub>22</sub> H <sub>24</sub> N <sub>2</sub> O <sub>2</sub> |  | FW                                                                                            | 407.5054                                                                |           |
| Acquisition Time (sec)                                                |  | 2.6564                                                                                        | Comment                                                                 |           |
| Date                                                                  |  | 18 Jun 2015 15:07:12                                                                          | Dr. Mustafa Sample : RAD-333 DMSO PROTON DMSO (D <sub>2</sub> O) nmr 18 |           |
| File Name                                                             |  | E:\Mostafa Alaraby Project\Oxazolone NMR\NMR final oxazolone\MUSTAFA RAD-333 18-06-2015\10f6d | Date Stamp                                                              |           |
| Nucleus                                                               |  | 1H                                                                                            | Number of Transients                                                    | 32        |
| Owner                                                                 |  | nmr                                                                                           | Points Count                                                            | 32768     |
| SW (cyclical) (Hz)                                                    |  | 12335.63                                                                                      | Solvent                                                                 | DMSO-d6   |
| Sweep Width (Hz)                                                      |  | 12335.15                                                                                      | Temperature (degree C)                                                  | 25.000    |
|                                                                       |  |                                                                                               | Pulse Sequence                                                          | zg30      |
|                                                                       |  |                                                                                               | Spectrum Offset (Hz)                                                    | 3706.1750 |
|                                                                       |  |                                                                                               | Receiver Gain                                                           | 128.00    |
|                                                                       |  |                                                                                               | Spectrum Type                                                           | STANDARD  |

<sup>1</sup>H NMR (600 MHz, DMSO-d<sub>6</sub>) δ 9.41 (s, 1H), 7.88 (t, *J* = 5.83 Hz, 1H), 7.58 (d, *J* = 9.04 Hz, 2H), 7.40 - 7.47 (m, 3H), 7.01 - 7.04 (m, 3H), 6.75 (d, *J* = 15.81 Hz, 1H), 6.69 (d, *J* = 9.03 Hz, 2H), 3.81 (s, 3H), 3.10 (q, *J* = 6.40 Hz, 2H), 2.92 (s, 6H), 1.46 (sxt, *J* = 7.30 Hz, 2H), 0.86 (t, *J* = 7.34 Hz, 3H)

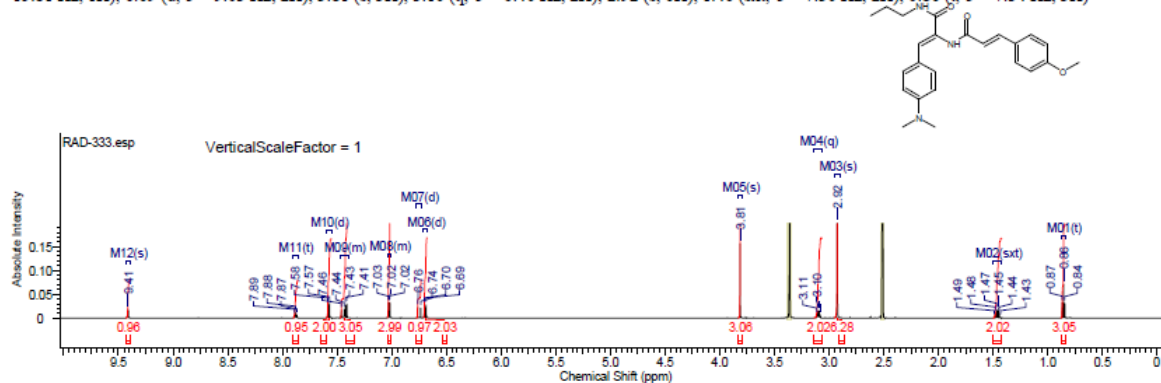

## <sup>13</sup>C NMR

This report was created by ACD/NMR Processor Academic Edition. For more information go to [www.acdlabs.com/nmrproc/](http://www.acdlabs.com/nmrproc/)

### RAD-333

25/09/2016 3:18:33 PM  
Dr. Moustafa Sample : RAD-333 DMSO

|                                                                       |                                                                                                                                        |                   |                                   |                        |         |                      |            |
|-----------------------------------------------------------------------|----------------------------------------------------------------------------------------------------------------------------------------|-------------------|-----------------------------------|------------------------|---------|----------------------|------------|
| Formula C <sub>22</sub> H <sub>24</sub> N <sub>2</sub> O <sub>2</sub> | FW                                                                                                                                     | 407.5053          |                                   |                        |         |                      |            |
| Acquisition Time (sec)                                                | 0.6423                                                                                                                                 | Comment           | Dr Moustafa Sample : RAD-333 DMSO |                        |         |                      |            |
| Date Stamp                                                            | 22 Apr 2016 05:48:32                                                                                                                   |                   | Date                              | 22 Apr 2016 05:48:32   |         |                      |            |
| File Name                                                             | E:\Projects\Mostafa Alaraby Project\Oxazolone\Oxazolone NMR\NMR final oxazolone\13 CNMR New 18-4-2016\MUSTAFA RAD-333 21-04-2016\20f6d |                   |                                   |                        |         |                      |            |
| Frequency (MHz)                                                       | 213.77                                                                                                                                 | Nucleus           | 13C                               | Number of Transients   | 12288   | OrIGIN               | spect      |
| Original Points Count                                                 | 32768                                                                                                                                  | Owner             | nmr                               | Points Count           | 32768   | Pulse Sequence       | zgpg30     |
| Receiver Gain                                                         | 186.93                                                                                                                                 | SW(cyclical) (Hz) | 51020.41                          | Solvent                | DMSO-d6 | Spectrum Offset (Hz) | 21286.0273 |
| Spectrum Type                                                         | STANDARD                                                                                                                               | Sweep Width (Hz)  | 51018.85                          | Temperature (degree C) | 24.999  |                      |            |

<sup>13</sup>C NMR (214 MHz, DMSO-d<sub>6</sub>) δ 164.3, 163.1, 158.6, 142.3, 134.5, 133.1, 131.9, 131.4, 129.4, 128.6, 119.0, 114.6, 113.9, 113.2, 55.3, 41.5, 40.5, 39.8, 39.7, 39.6, 39.4, 39.3, 39.2, 22.1, 11.3

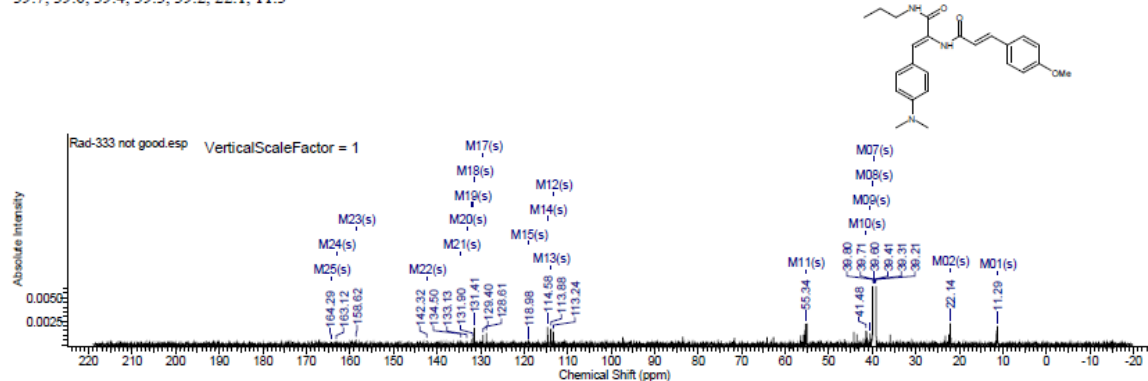

## Spectra of (3012)

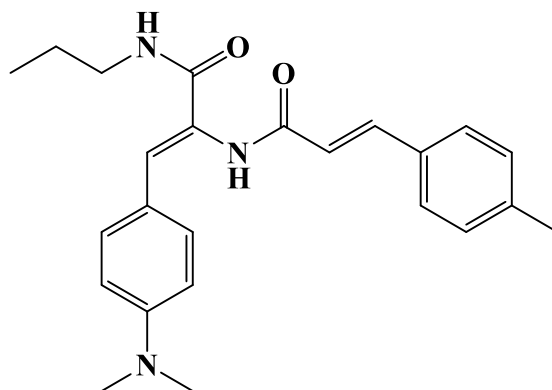

## LC/MS

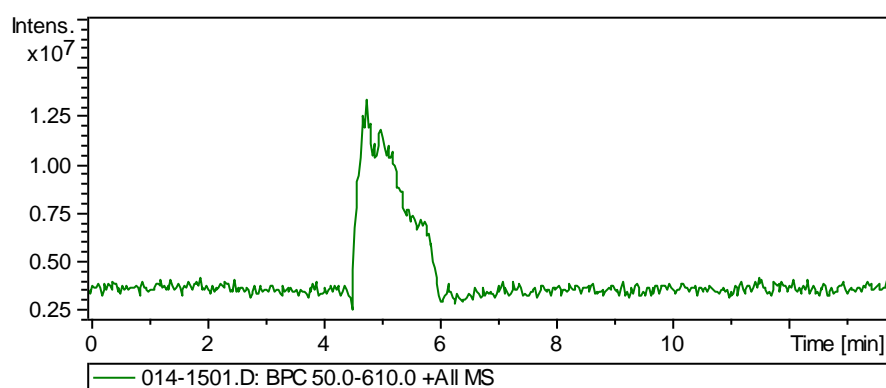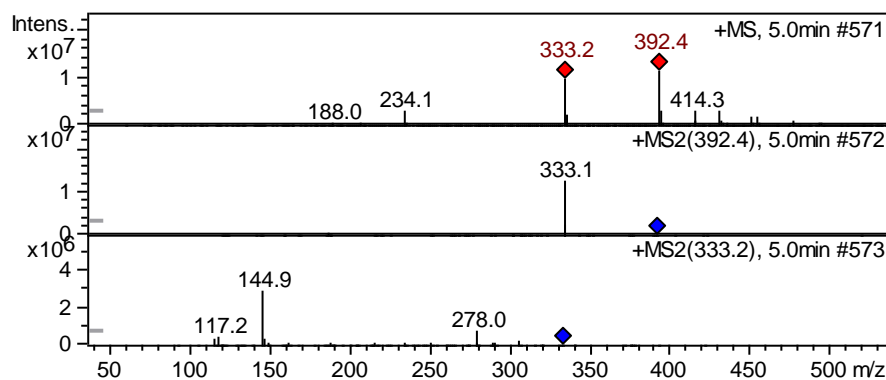

## FT-IR

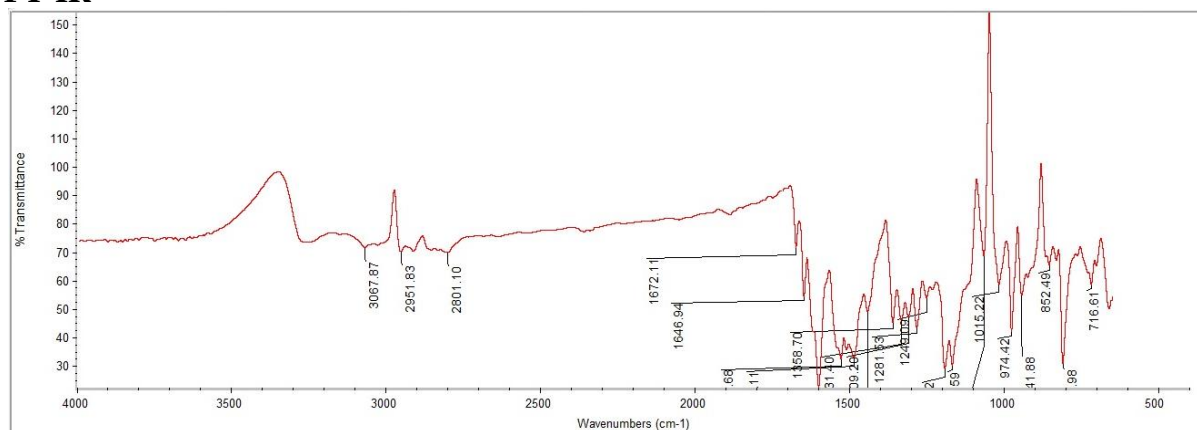<sup>1</sup>H NMR

## Supplementary Information

This report was created by ACD/NMR Processor Academic Edition. For more information go to [www.acdlabs.com/nmrproc/](http://www.acdlabs.com/nmrproc/)

## RAD-334

18/02/2017 10:53:27 AM  
Dr. Mostafa Sample : RAD-334 DMSO

|                                                                     |                                                                                                    |                        |                                  |                      |           |                 |                       |          |  |
|---------------------------------------------------------------------|----------------------------------------------------------------------------------------------------|------------------------|----------------------------------|----------------------|-----------|-----------------|-----------------------|----------|--|
| Formula C <sub>8</sub> H <sub>6</sub> N <sub>2</sub> O <sub>2</sub> |                                                                                                    | PW                     | 391.5060                         |                      |           |                 |                       |          |  |
| Acquisition Time (sec)                                              | 1.9268                                                                                             | Comment                | Dr.Mostafa Sample : RAD-334 DMSO |                      |           | Date            | 14 Feb 2017 12:44:32  |          |  |
| Date Stamp                                                          | 14 Feb 2017 12:44:32                                                                               |                        |                                  |                      |           |                 |                       |          |  |
| File Name                                                           | E:\Projects\Mostafa\Almarby Project\Oxazolone\Rad 335 new arnims\MOSTAFA_RAD-334_14-02-2017\30.fid |                        |                                  |                      |           | Frequency (MHz) | 850.15                |          |  |
| Nucleus                                                             | <sup>1</sup> H                                                                                     | Number of Transients   | 64                               | Origin               | spec      |                 | Original Points Count | 32768    |  |
| Owner                                                               | Points Count                                                                                       |                        | 32768                            | Pulse Sequence       | zgpg30    |                 | Receiver Gain         | 10.65    |  |
| SW(cyclical) (Hz)                                                   | 17006.80                                                                                           | Solvent                | DMSO-d <sub>6</sub>              | Spectrum Offset (Hz) | 5250.0283 |                 | Spectrum Type         | STANDARD |  |
| Sweep Width (Hz)                                                    | 17006.28                                                                                           | Temperature (degree C) | 25.000                           |                      |           |                 |                       |          |  |

<sup>1</sup>H NMR (850 MHz, DMSO-*d*<sub>6</sub>)  $\delta$  9.51 (br. s., 1H), 7.96 (t, *J* = 5.97 Hz, 1H), 7.45 - 7.52 (m, 2H), 7.24 - 7.28 (m, *J* = 7.78 Hz, 2H), 7.21 (s, 1H), 7.04 (s, 1H), 6.99 (d, *J* = 8.30 Hz, 1H), 6.84 (d, *J* = 15.57 Hz, 1H), 6.76 (d, *J* = 8.30 Hz, 1H), 3.11 (q, *J* = 6.57 Hz, 2H), 2.51 (br. s., 9H), 2.34 (s, 2H), 1.47 (sxt, *J* = 7.16 Hz, 2H), 0.85 - 0.87 (m, 3H).

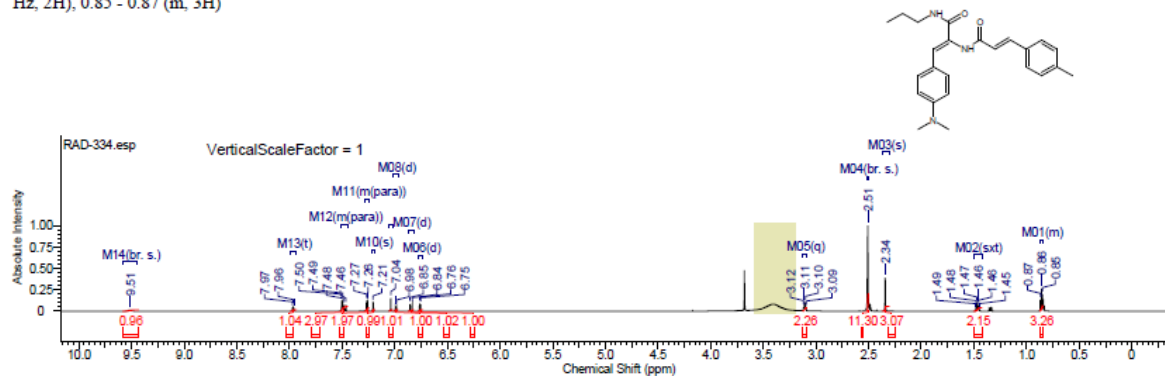

## Spectra of (3112)

# Supplementary Information

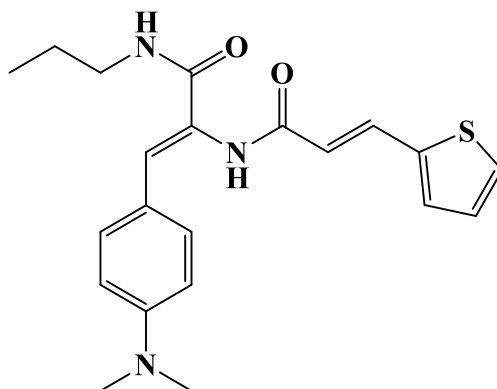

## LC/MS

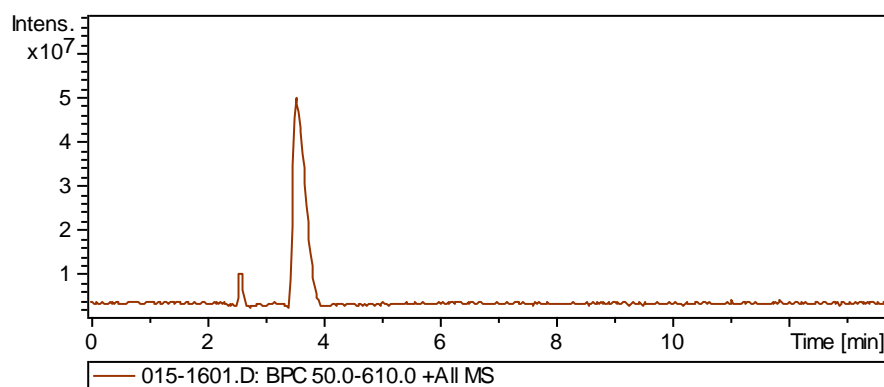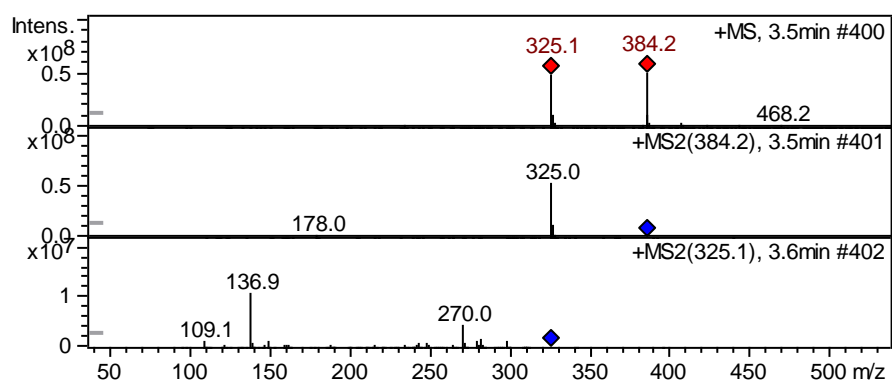

## FT-IR

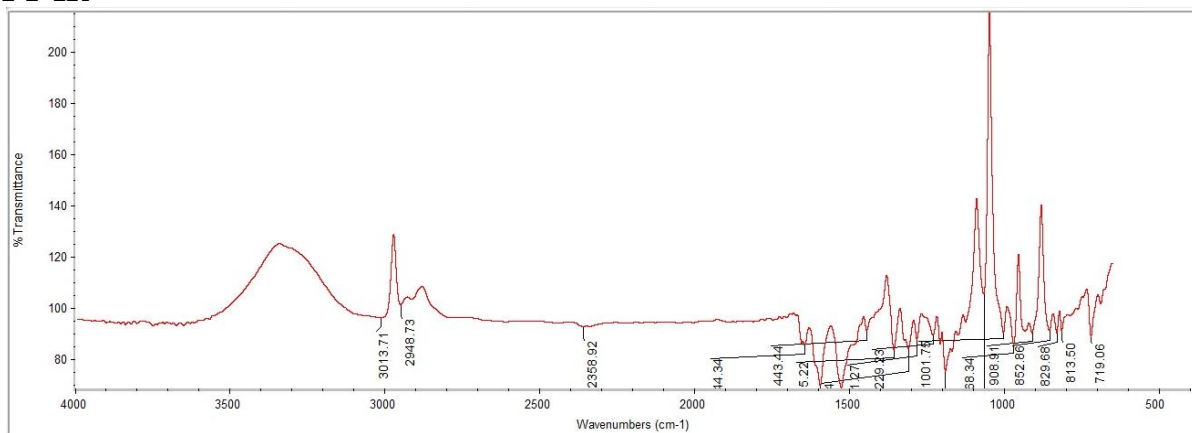

## <sup>1</sup>H NMR

## Supplementary Information

This report was created by ACD/NMR Processor Academic Edition. For more information go to [www.acdlabs.com/nmrproc/](http://www.acdlabs.com/nmrproc/)

### RAD-335

08/11/2016 8:37:35 AM

Dr.Mustafa Sample : RAD-335 DMSO PROTON DMSO (D:Magdy) nmr 16

|                        |                                                                                               |                        |                                                               |
|------------------------|-----------------------------------------------------------------------------------------------|------------------------|---------------------------------------------------------------|
| Formula                | C <sub>21</sub> H <sub>24</sub> N <sub>2</sub> O <sub>3</sub> S                               | FW                     | 383.5071                                                      |
| Acquisition Time (sec) | 2.6564                                                                                        | Comment                | Dr.Mustafa Sample : RAD-335 DMSO PROTON DMSO (D:Magdy) nmr 16 |
| Date                   | 18 Jun 2015 14:56:32                                                                          | Date Stamp             | 18 Jun 2015 14:56:32                                          |
| File Name              | E:\Mostafa Alaraby Project\Oxazolone NMR\NMR final oxazolone\MUSTAFA RAD-335 18-06-2015\10fid | Frequency (MHz)        | 600.15                                                        |
| Nucleus                | <sup>1</sup> H                                                                                | Number of Transients   | 32                                                            |
| Owner                  | nmr                                                                                           | Points Count           | 32768                                                         |
| SWH (Hz)               | 12335.53                                                                                      | Solvent                | DMSO-d <sub>6</sub>                                           |
| Sweep Width (Hz)       | 12335.15                                                                                      | Temperature (degree C) | 25.000                                                        |
|                        |                                                                                               | Pulse Sequence         | zg30                                                          |
|                        |                                                                                               | Spectrum Offset (Hz)   | 3706.1750                                                     |
|                        |                                                                                               | Receiver Gain          | 161.00                                                        |
|                        |                                                                                               | Spectrum Type          | STANDARD                                                      |

<sup>1</sup>H NMR (600 MHz, DMSO-d<sub>6</sub>) δ 9.47 (s, 1H), 7.90 (t, *J* = 5.83 Hz, 1H), 7.61 - 7.68 (m, 2H), 7.44 (d, *J* = 3.39 Hz, 1H), 7.38 - 7.42 (m, *J* = 9.04 Hz, 2H), 7.15 (dd, *J* = 3.58, 5.08 Hz, 1H), 7.03 (s, 1H), 6.68 - 6.72 (m, *J* = 9.03 Hz, 2H), 6.64 (d, *J* = 15.81 Hz, 1H), 3.09 (q, *J* = 6.40 Hz, 2H), 2.93 (s, 5H), 1.46 (sxt, *J* = 7.30 Hz, 2H), 0.85 (t, *J* = 7.34 Hz, 3H)

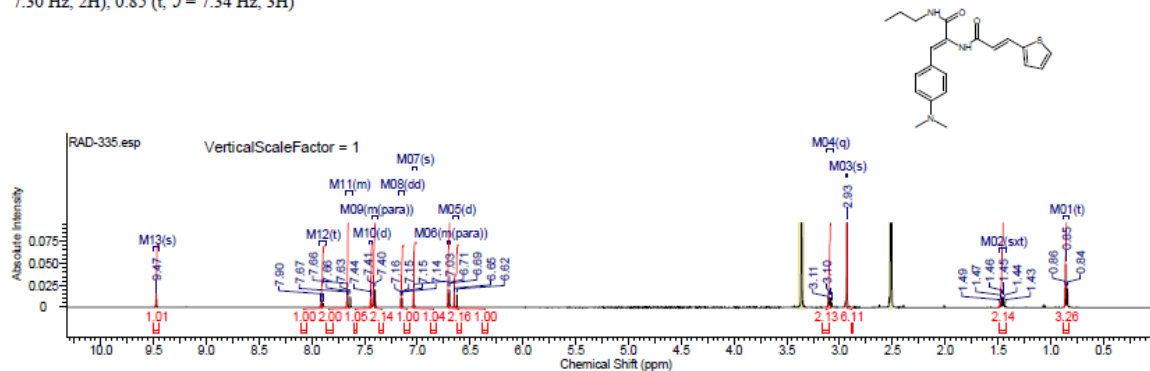

Spectra of (3212)

# Supplementary Information

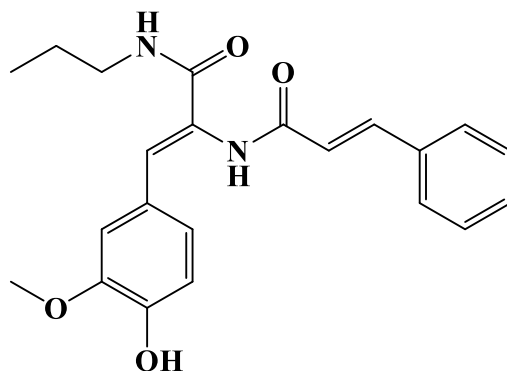

## LC/MS

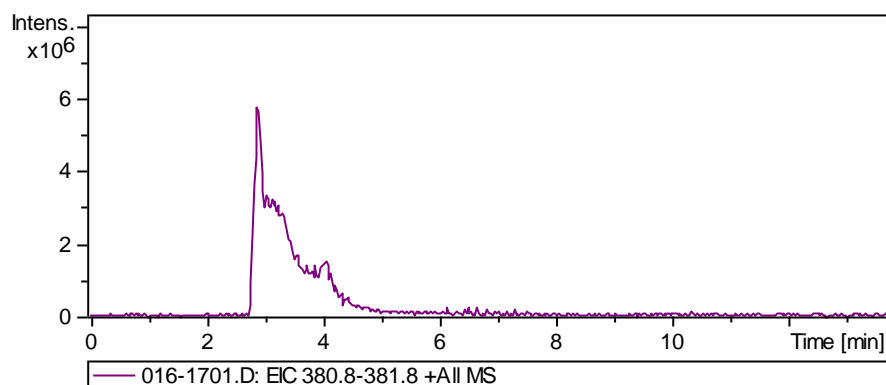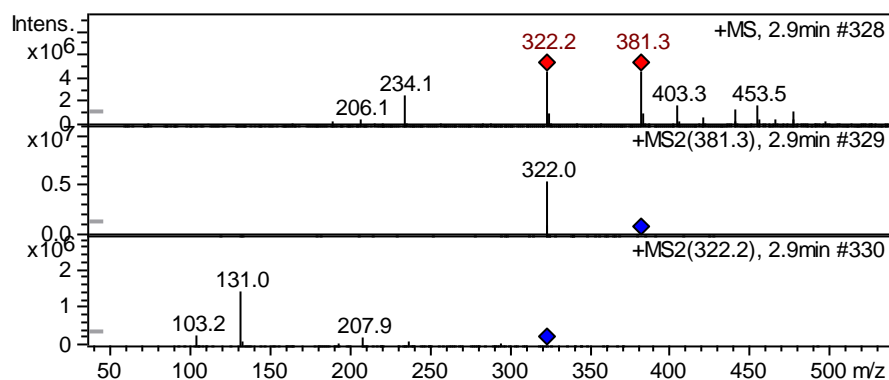

## FT-IR

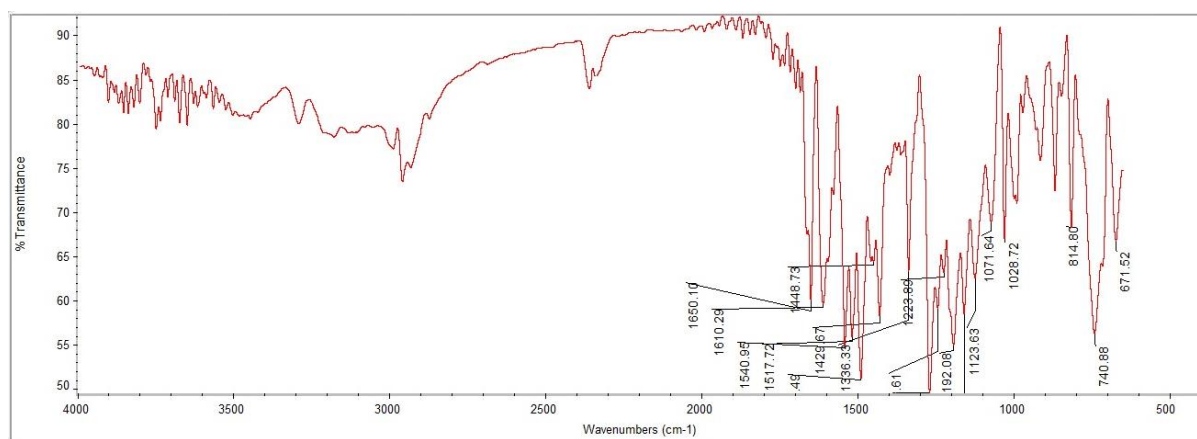

## <sup>1</sup>H NMR

## Supplementary Information

This report was created by ACD/NMR Processor Academic Edition. For more information go to [www.acdlabs.com/nmrproc/](http://www.acdlabs.com/nmrproc/)

### RAD-341

08/11/2016 8:41:07 AM

Dr.Mustafa Sample : RAD-341 DMSO PROTON DMSO (D:Magdy) nmr 23

|                                                                       |                                                                                                |                        |                                                               |                       |
|-----------------------------------------------------------------------|------------------------------------------------------------------------------------------------|------------------------|---------------------------------------------------------------|-----------------------|
| Formula C <sub>20</sub> H <sub>19</sub> N <sub>3</sub> O <sub>3</sub> |                                                                                                | FW                     | 380.4370                                                      |                       |
| Acquisition Time (sec)                                                | 2.6564                                                                                         | Comment                | Dr.Mustafa Sample : RAD-341 DMSO PROTON DMSO (D:Magdy) nmr 23 |                       |
| Date                                                                  | 18 Jun 2015 15:32:48                                                                           | Date Stamp             | 18 Jun 2015 15:32:48                                          |                       |
| File Name                                                             | E:\Mostafa Alaraby Project\Oxazolone NMR\NMR final oxazolone\MUSTAFA RAD-341 18-06-2015\10.fid |                        | Frequency (MHz)                                               | 600.15                |
| Nucleus                                                               | <sup>1</sup> H                                                                                 | Number of Transients   | 32                                                            | Origin                |
| Owner                                                                 | nmr                                                                                            | Points Count           | 32768                                                         | spec                  |
| SW (cyclical) (Hz)                                                    | 12335.53                                                                                       | Pulse Sequence         | zg30                                                          | Original Points Count |
| Sweep Width (Hz)                                                      | 12335.15                                                                                       | Solvent                | DMSO-d6                                                       | Receiver Gain         |
|                                                                       |                                                                                                | Spectrum Offset (Hz)   | 3708.1750                                                     | 114.00                |
|                                                                       |                                                                                                | Temperature (degree C) | 25.000                                                        | Spectrum Type         |
|                                                                       |                                                                                                |                        |                                                               | STANDARD              |

<sup>1</sup>H NMR (600 MHz, DMSO-d<sub>6</sub>) δ 8.02 (br. s., 1H), 7.61 (d, *J* = 7.15 Hz, 2H), 7.39 - 7.55 (m, 4H), 7.21 (s, 1H), 7.04 (s, 1H), 6.91 (d, *J* = 16.19 Hz, 1H), 6.77 (d, *J* = 8.28 Hz, 1H), 3.69 (s, 3H), 3.11 (q, *J* = 6.65 Hz, 2H), 1.47 (sxt, *J* = 7.15 Hz, 2H), 0.86 (t, *J* = 7.34 Hz, 3H)

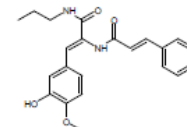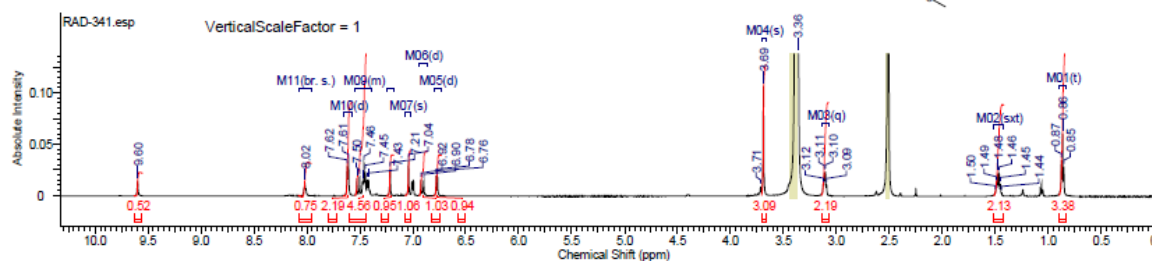

### <sup>13</sup>C NMR

This report was created by ACD/NMR Processor Academic Edition. For more information go to [www.acdlabs.com/nmrproc/](http://www.acdlabs.com/nmrproc/)

### RAD-341

20/09/2016 9:24:57 AM

Dr.Mustafa Sample : RAD-341 DMSO

|                                                                       |                                                                                                                                         |                  |                                   |                        |                                 |
|-----------------------------------------------------------------------|-----------------------------------------------------------------------------------------------------------------------------------------|------------------|-----------------------------------|------------------------|---------------------------------|
| Formula C <sub>20</sub> H <sub>19</sub> N <sub>3</sub> O <sub>3</sub> | FW                                                                                                                                      | 380.4370         |                                   |                        |                                 |
| Acquisition Time (sec)                                                | 0.6423                                                                                                                                  | Comment          | Dr. Mustafa Sample : RAD-341 DMSO | Date                   | 19 Apr 2016 05:54:56            |
| Date Stamp                                                            | 19 Apr 2016 05:54:56                                                                                                                    |                  |                                   |                        |                                 |
| File Name                                                             | E:\Projects\Mostafa Alaraby Project\Oxazolone\Oxazolone NMR\NMR final oxazolone\13 CNMR New 18-4-2016\MUSTAFA RAD-341 18-04-2016\80.fid |                  |                                   |                        |                                 |
| Frequency (MHz)                                                       | 213.77                                                                                                                                  | Nucleus          | <sup>13</sup> C                   | Number of Transients   | 3072                            |
| Original Points Count                                                 | 32768                                                                                                                                   | Owner            | nmr                               | Points Count           | 32768                           |
| Receiver Gain                                                         | 188.93                                                                                                                                  | SWWidth (Hz)     | 51020.41                          | Solvent                | DMSO-d6                         |
| Spectrum Type                                                         | STANDARD                                                                                                                                | Sweep Width (Hz) | 51018.95                          | Temperature (degree C) | 25.000                          |
|                                                                       |                                                                                                                                         |                  |                                   |                        | Pulse Sequence zgpg30           |
|                                                                       |                                                                                                                                         |                  |                                   |                        | Spectrum Offset (Hz) 21296.9258 |

<sup>13</sup>C NMR (214 MHz, DMSO-d<sub>6</sub>) δ 165.2, 164.8, 147.5, 147.3, 139.8, 134.9, 129.9, 129.2, 128.6, 127.7, 127.2, 125.5, 123.8, 121.8, 115.5, 112.9, 55.4, 41.0, 39.8, 39.7, 39.6, 39.4, 39.3, 39.2, 22.5, 11.5

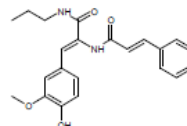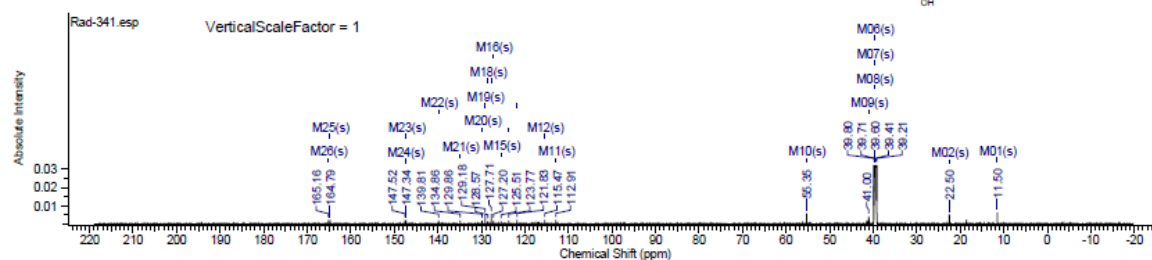

## Spectra of (3312)

# Supplementary Information

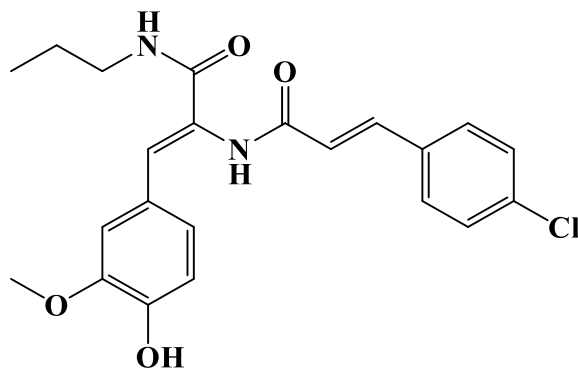

## LC/MS

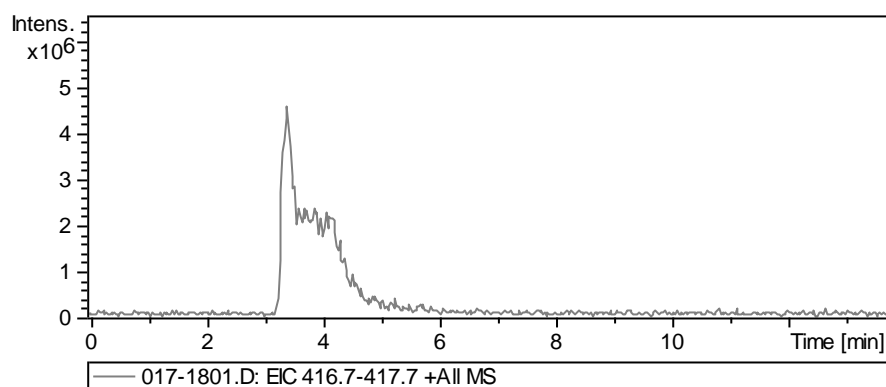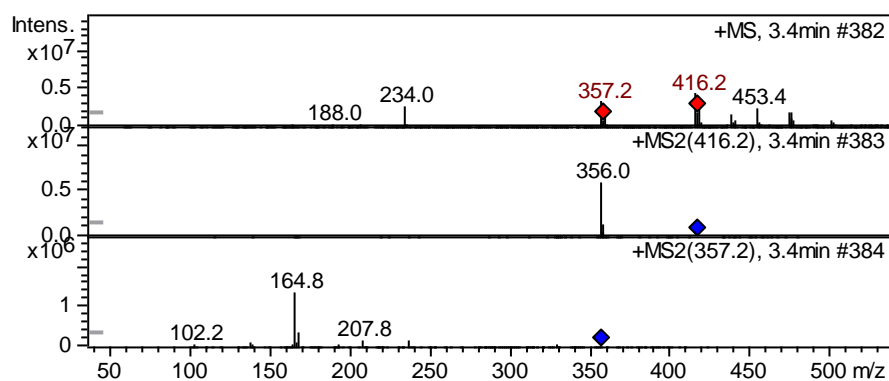

## FT-IR

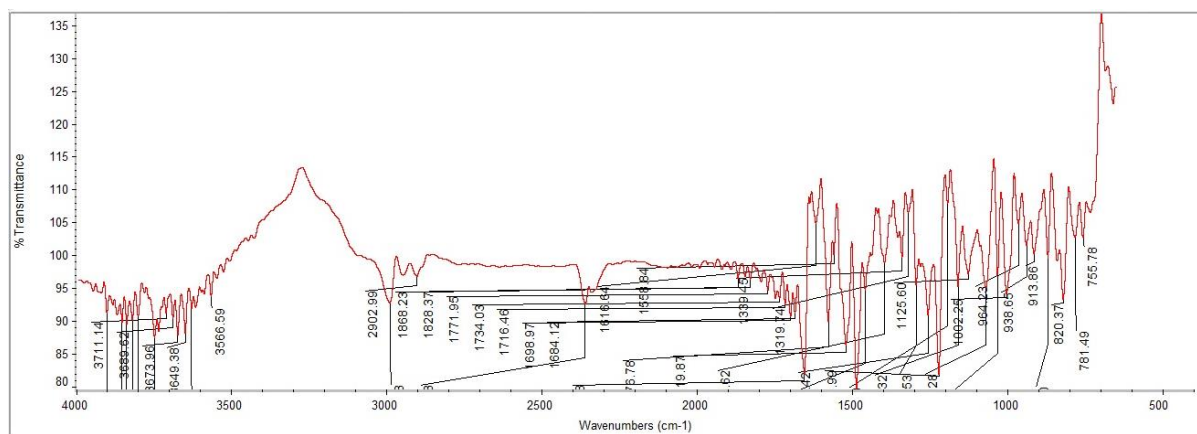

## <sup>1</sup>H NMR



## Supplementary Information

This report was created by ACD/NMR Processor Academic Edition. For more information go to [www.acdlabs.com/nmrproc/](http://www.acdlabs.com/nmrproc/)

### RAD-342

08/11/2016 8:51:48 AM

Dr.Mustafa Sample : RAD-342 DMSO PROTON DMSO (D:Magdy) nmr 33

|                                                                                                           |                               |                                                                       |                             |
|-----------------------------------------------------------------------------------------------------------|-------------------------------|-----------------------------------------------------------------------|-----------------------------|
| Formula C <sub>17</sub> H <sub>19</sub> ClN <sub>2</sub> O <sub>2</sub>                                   |                               | FW 414.8820                                                           |                             |
| Acquisition Time (sec) 2.8564                                                                             |                               | Comment Dr.Mustafa Sample : RAD-342 DMSO PROTON DMSO (D:Magdy) nmr 33 |                             |
| Date 18 Jun 2015 16:24:00                                                                                 |                               | Date Stamp 18 Jun 2015 16:24:00                                       |                             |
| File Name E:\Mustafa Alarabiy Project\Oxazolone NMR\NMR final oxazolone\MUSTAFA RAD-342 18-06-2015\10\fid |                               | Frequency (MHz) 600.15                                                |                             |
| Nucleus 1H                                                                                                | Number of Transients 32       | Origin spect                                                          | Original Points Count 32768 |
| Owner nmr                                                                                                 | Pulse Count 27268             | Pulse Sequence zg30                                                   | Receiver Gain 144.00        |
| SW(cyclical) (Hz) 12335.53                                                                                | Solvent DMSO-d6               | Spectrum Offset (Hz) 3706.1750                                        | Spectrum Type STANDARD      |
| Sweep Width (Hz) 12335.15                                                                                 | Temperature (degree C) 25.000 |                                                                       |                             |

<sup>1</sup>H NMR (600 MHz, DMSO-d<sub>6</sub>) δ 9.61 (br. s., 1H), 8.01 (t, *J* = 5.83 Hz, 1H), 7.64 (d, *J* = 8.28 Hz, 2H), 7.48 - 7.56 (m, 3H), 7.20 (d, *J* = 2.26 Hz, 1H), 7.04 (s, 1H), 6.99 (dd, *J* = 1.88, 8.28 Hz, 1H), 6.90 (d, *J* = 16.19 Hz, 1H), 6.76 (d, *J* = 8.28 Hz, 1H), 3.68 (s, 3H), 3.08 - 3.13 (m, 2H), 1.47 (sxt, *J* = 7.23 Hz, 2H), 0.85 - 0.88 (m, 3H)

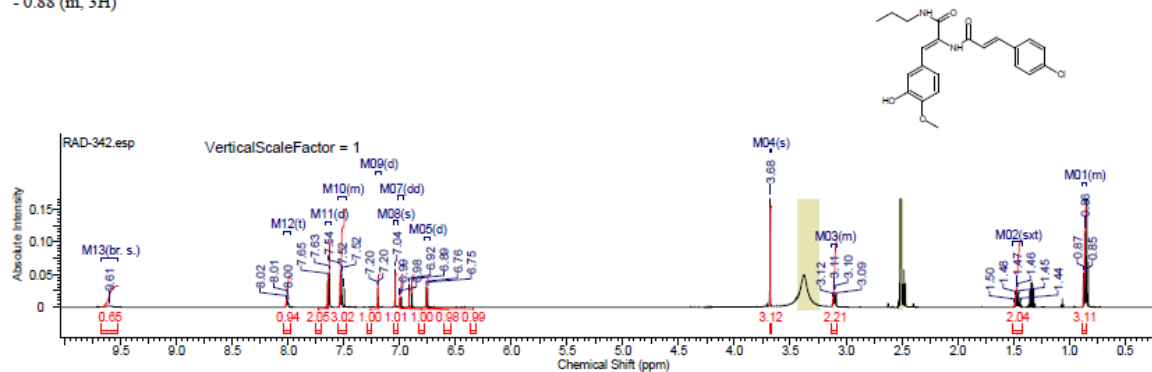

Spectra of (3412)

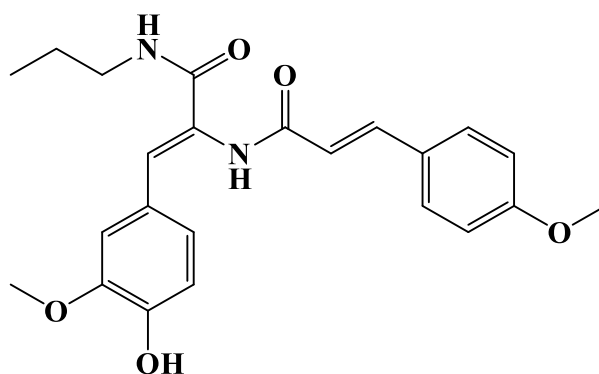

## LC/MS

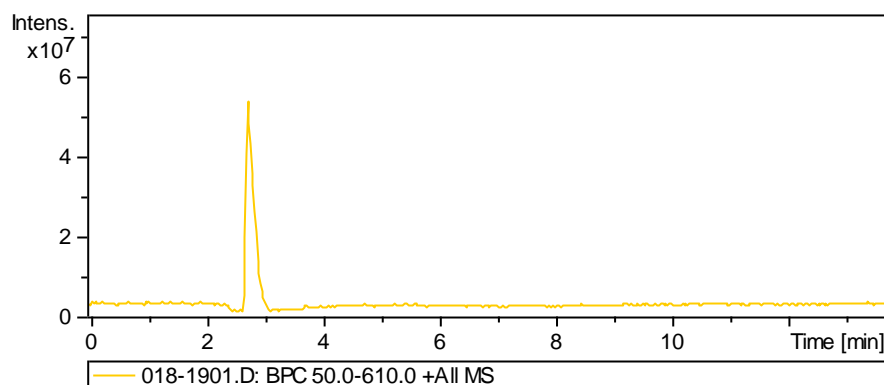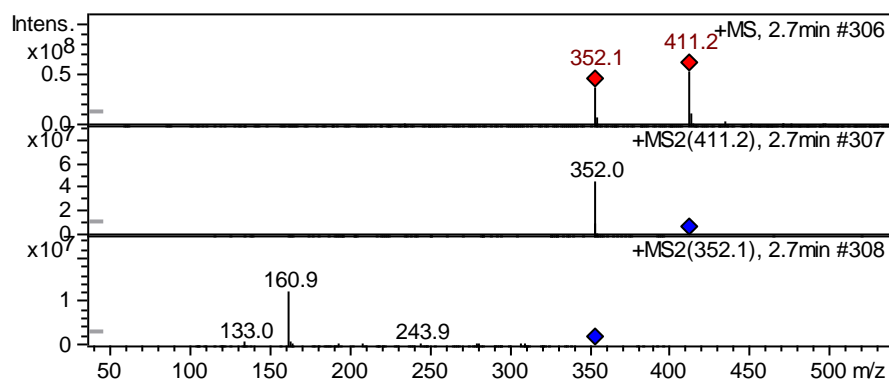

## FT-IR

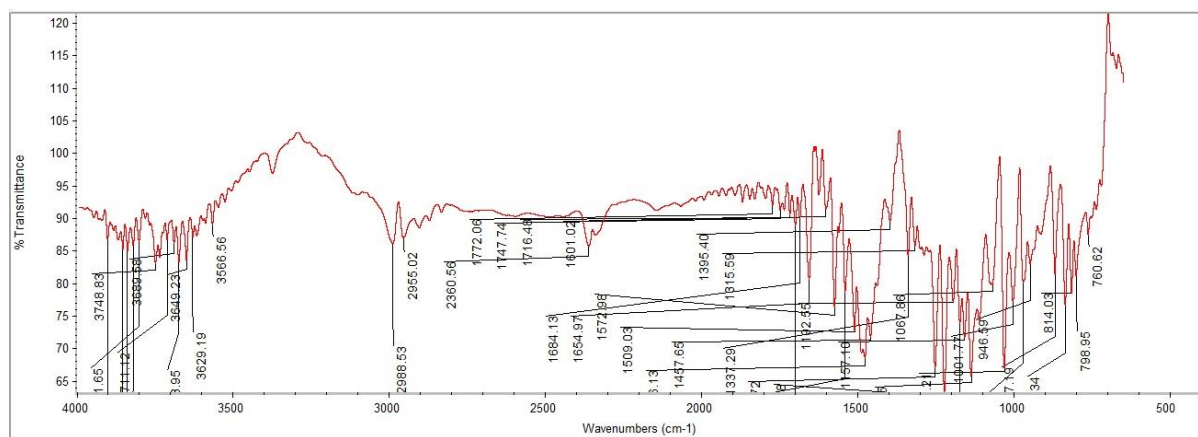

## <sup>1</sup>H NMR

# Supplementary Information

This report was created by ACD/NMR Processor Academic Edition. For more information go to [www.acdlabs.com/nmrproc/](http://www.acdlabs.com/nmrproc/)

## RAD-343

11/10/2016 8:44:34 AM

Dr.Mustafa Sample : RAD-343 DMSO PROTON DMSO (D:Magdy) nmr 19

|                                                                                                          |  |                                                                       |  |
|----------------------------------------------------------------------------------------------------------|--|-----------------------------------------------------------------------|--|
| Formula C <sub>21</sub> H <sub>21</sub> N <sub>3</sub> O <sub>4</sub>                                    |  | FW 410.4629                                                           |  |
| Acquisition Time (sec) 2.0564                                                                            |  | Comment Dr.Mustafa Sample : RAD-343 DMSO PROTON DMSO (D:Magdy) nmr 19 |  |
| Date 18 Jun 2015 15:11:28                                                                                |  | Date Stamp 18 Jun 2015 15:11:28                                       |  |
| File Name E:\Mostafa Alaraby Project\Oxazolone NMR\NMR final oxazolone\MUSTAFA_RAD-343_18-06-2015\10.fid |  | Frequency (MHz) 600.15                                                |  |
| Nucleus <sup>1</sup> H                                                                                   |  | Number of Transients 32                                               |  |
| Owner nmr                                                                                                |  | Points Count 32788                                                    |  |
| SW (Hz) 12335.53                                                                                         |  | Pulse Sequence zgpg30                                                 |  |
| Sweep Width (Hz) 12335.15                                                                                |  | Solvent DMSO-d6                                                       |  |
|                                                                                                          |  | Spectrum Offset (Hz) 3706.1750                                        |  |
|                                                                                                          |  | Receiver Gain 128.00                                                  |  |
|                                                                                                          |  | Temperature (degree C) 25.000                                         |  |
|                                                                                                          |  | Spectrum Type STANDARD                                                |  |

<sup>1</sup>H NMR (600 MHz, DMSO-d<sub>6</sub>)  $\delta$  9.49 (br. s., 1H), 7.97 (t,  $J$  = 6.02 Hz, 1H), 7.53 - 7.59 (m, 2H), 7.46 (d,  $J$  = 15.81 Hz, 1H), 7.21 (d,  $J$  = 1.88 Hz, 1H), 7.00 - 7.03 (m, 3H), 6.99 (dd,  $J$  = 1.88, 8.28 Hz, 1H), 6.77 (d,  $J$  = 6.78 Hz, 1H), 6.75 (s, 1H), 3.81 (s, 3H), 3.68 (s, 3H), 3.08 - 3.13 (m, 2H), 1.47 (sxt,  $J$  = 7.30 Hz, 2H), 0.85 - 0.88 (m, 3H)

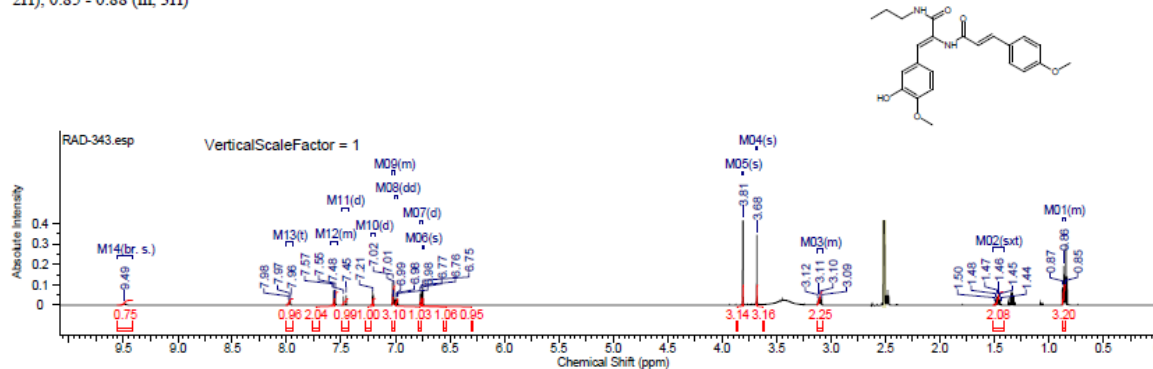

## Spectra of (3512)

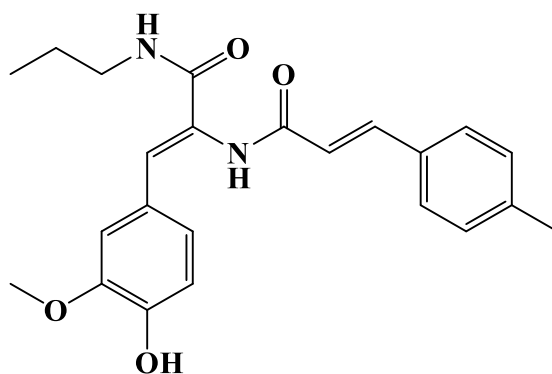

## LC/MS

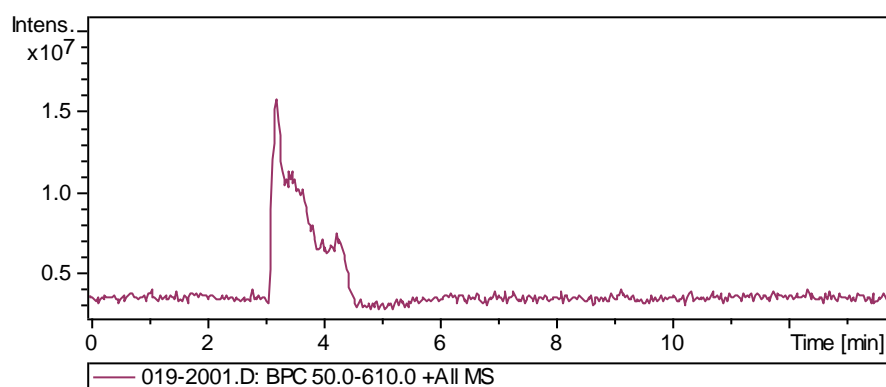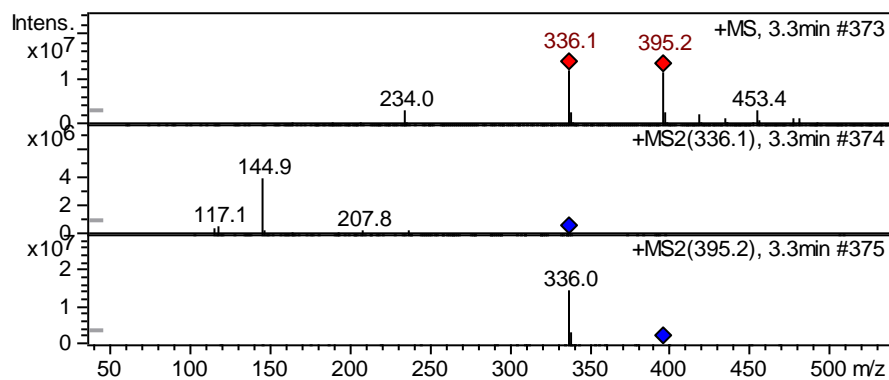

## FT-IR

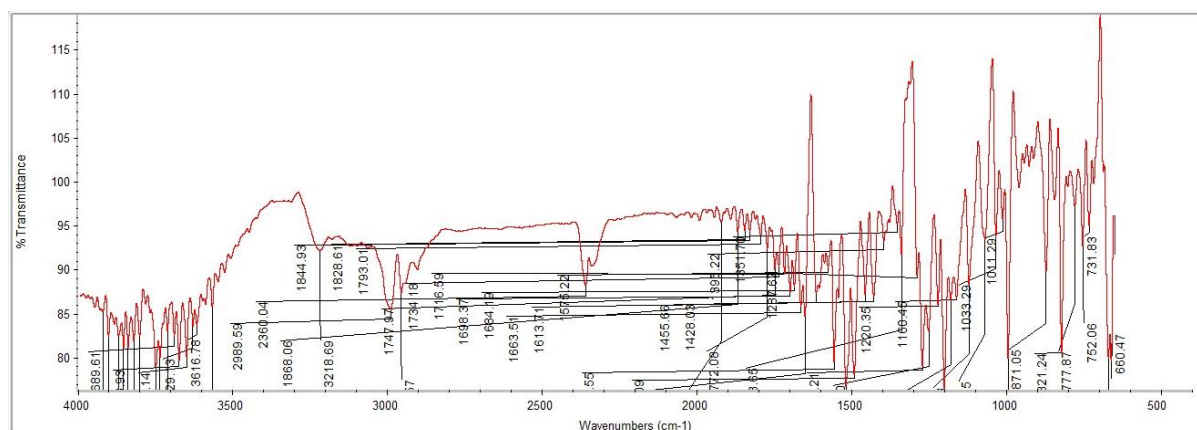

# Supplementary Information

## <sup>1</sup>H NMR

This report was created by ACD/NMR Processor Academic Edition. For more information go to [www.acdlabs.com/nmrproc/](http://www.acdlabs.com/nmrproc/)

### RAD-344

08/11/2016 9:06:10 AM  
Dr.Mustafa Sample : RAD-344 DMSO PROTON DMSO (D<sub>2</sub>O) nmr 10

|                                                                       |                                                                              |                        |                                                                        |
|-----------------------------------------------------------------------|------------------------------------------------------------------------------|------------------------|------------------------------------------------------------------------|
| Formula C <sub>18</sub> H <sub>18</sub> N <sub>2</sub> O <sub>4</sub> | FW                                                                           | 394.4635               |                                                                        |
| Acquisition Time (sec)                                                | 2.8564                                                                       | Comment                | Dr.Mustafa Sample : RAD-344 DMSO PROTON DMSO (D <sub>2</sub> O) nmr 10 |
| Date                                                                  | 18 Jun 2015 14:24:32                                                         | Date Stamp             | 18 Jun 2015 14:24:32                                                   |
| File Name                                                             | E:\Mostafa Alaraby Project\Oxazolone NMR\NMR final oxazolone\MUSTAFA RAD-344 |                        | 18-06-20151015fId                                                      |
| Nucleus                                                               | <sup>1</sup> H                                                               | Number of Transients   | 32                                                                     |
| Owner                                                                 | nmr                                                                          | Points Count           | 32768                                                                  |
| SW (cyclical) (Hz)                                                    | 12335.53                                                                     | Solvent                | DMSO-d6                                                                |
| Sweep Width (Hz)                                                      | 12335.15                                                                     | Temperature (degree C) | 25.000                                                                 |
|                                                                       |                                                                              | Spectrum Offset (Hz)   | 3706.1750                                                              |
|                                                                       |                                                                              | Receiver Gain          | 144.00                                                                 |
|                                                                       |                                                                              | Spectrum Type          | STANDARD                                                               |

<sup>1</sup>H NMR (600 MHz, DMSO-d<sub>6</sub>) δ 9.54 (s, 1H), 9.39 (br. s., 1H), 8.00 (t, *J* = 5.65 Hz, 1H), 7.44 - 7.53 (m, 3H), 7.27 (d, *J* = 7.91 Hz, 2H), 7.21 (s, 1H), 7.03 (s, 1H), 6.99 (dd, *J* = 1.88, 8.28 Hz, 1H), 6.85 (d, *J* = 15.81 Hz, 1H), 6.76 (d, *J* = 8.28 Hz, 1H), 3.68 (s, 3H), 3.10 (q, *J* = 6.65 Hz, 2H), 2.35 (s, 3H), 1.47 (sxt, *J* = 7.23 Hz, 2H), 0.86 (t, *J* = 7.34 Hz, 3H)

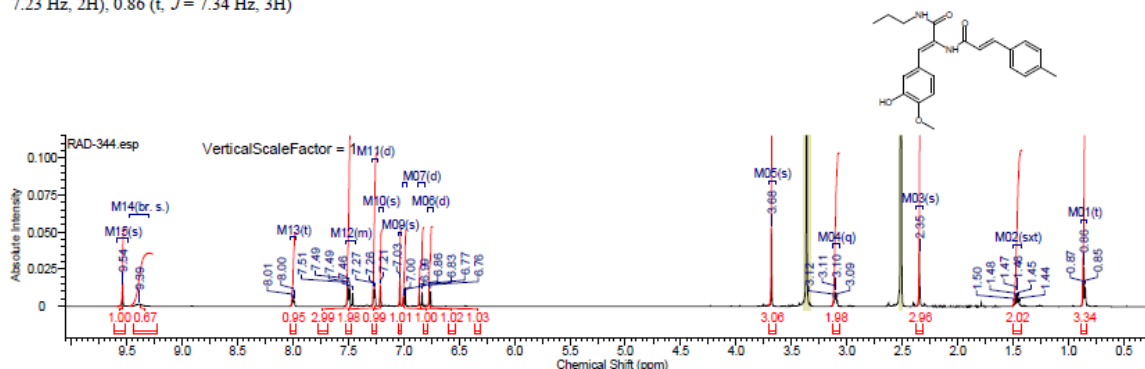

## <sup>13</sup>C NMR

This report was created by ACD/NMR Processor Academic Edition. For more information go to [www.acdlabs.com/nmrproc/](http://www.acdlabs.com/nmrproc/)

### RAD-344

20/09/2016 9:31:55 AM  
Dr.Mustafa Sample : RAD-344 DMSO

|                                                                       |                                                                                                                                          |                        |                             |                      |
|-----------------------------------------------------------------------|------------------------------------------------------------------------------------------------------------------------------------------|------------------------|-----------------------------|----------------------|
| Formula C <sub>18</sub> H <sub>18</sub> N <sub>2</sub> O <sub>4</sub> | FW                                                                                                                                       | 394.4635               |                             |                      |
| Acquisition Time (sec)                                                | 0.8423                                                                                                                                   | Comment                | Dr.Mustafa Sample : RAD-344 | DMSO                 |
| Date Stamp                                                            | 20 Apr 2016 20:06:08                                                                                                                     | Date                   | 20 Apr 2016 20:06:08        |                      |
| File Name                                                             | E:\Projects\Mostafa Alaraby Project\Oxazolone\Oxazolone NMR\NMR final oxazolone\13 CNMR New 18-4-2016\MUSTAFA RAD-344 19-04-2016\140\fid |                        |                             |                      |
| Frequency (MHz)                                                       | 213.77                                                                                                                                   | Nucleus                | <sup>13</sup> C             | Number of Transients |
| Original Points Count                                                 | 32768                                                                                                                                    | Owner                  | nmm                         | 3500                 |
| Receiver Gain                                                         | 186.93                                                                                                                                   | SW (cyclical) (Hz)     | 51020.41                    | Points Count         |
| Spectrum Type                                                         | STANDARD                                                                                                                                 | Solvent                | DMSO-d6                     | 32768                |
|                                                                       |                                                                                                                                          | Sweep Width (Hz)       | 51018.85                    | Pulse Sequence       |
|                                                                       |                                                                                                                                          | Temperature (degree C) | 25.000                      | zgpg30               |
|                                                                       |                                                                                                                                          |                        |                             | Spectrum Offset (Hz) |
|                                                                       |                                                                                                                                          |                        |                             | 21290.8973           |

<sup>13</sup>C NMR (214 MHz, DMSO-d<sub>6</sub>) δ 165.1, 164.9, 147.5, 147.3, 139.7, 139.6, 132.1, 129.7, 128.5, 127.7, 127.3, 125.5, 123.7, 120.8, 115.4, 112.9, 55.3, 41.0, 39.8, 39.7, 39.6, 39.4, 39.3, 39.2, 22.5, 11.5

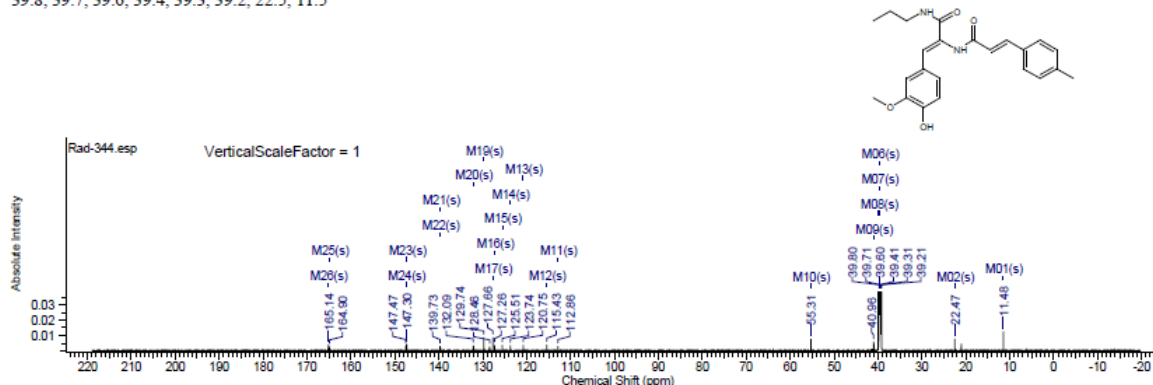

## Spectra of (3612)

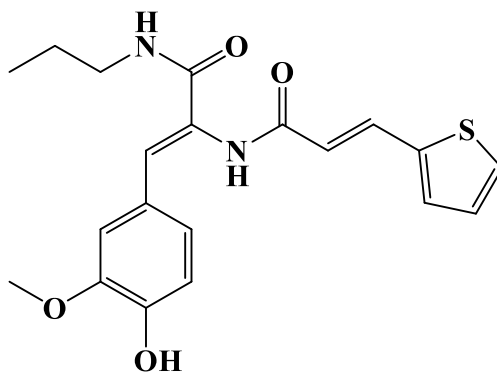

## LC/MS

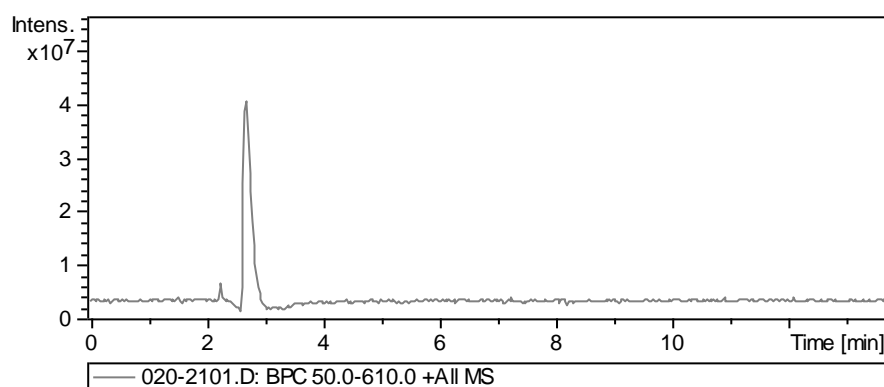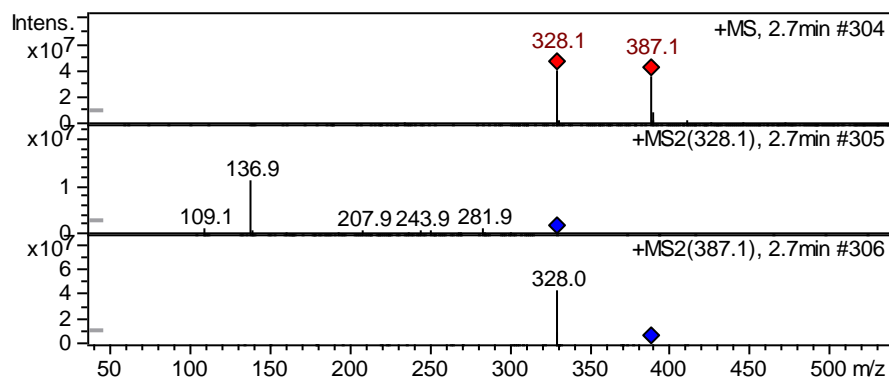

## FT-IR

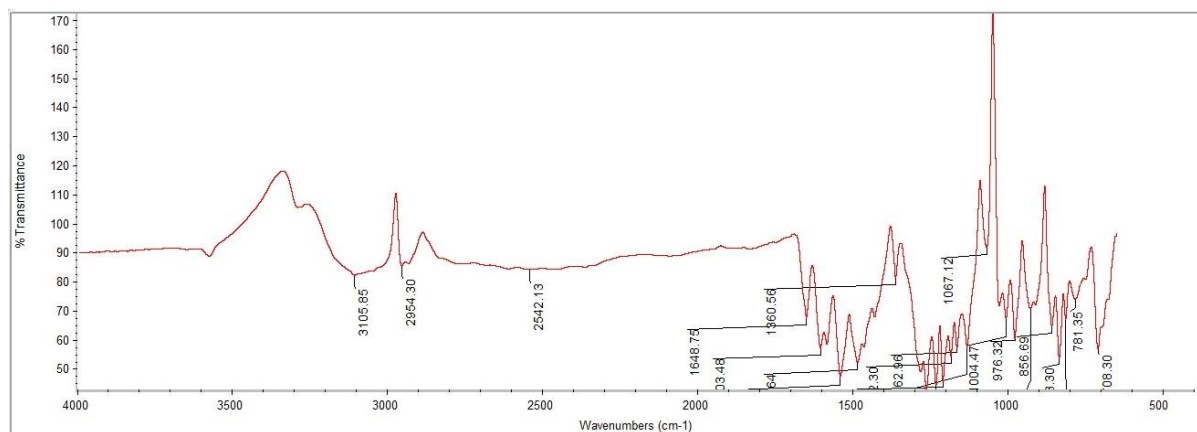

# Supplementary Information

## <sup>1</sup>H NMR

This report was created by ACD/NMR Processor Academic Edition. For more information go to [www.acdlabs.com/nmrproc/](http://www.acdlabs.com/nmrproc/)

### RAD-345

11/10/2016 8:53:39 AM  
Dr.Mustafa Sample : RAD-345 DMSO PROTON DMSO (D:Magdy) nmr 14

|                                                                         |                                                                                               |                        |                                                               |
|-------------------------------------------------------------------------|-----------------------------------------------------------------------------------------------|------------------------|---------------------------------------------------------------|
| Formula C <sub>18</sub> H <sub>18</sub> N <sub>2</sub> O <sub>3</sub> S |                                                                                               | FW 386.4647            |                                                               |
| Acquisition Time (sec)                                                  | 2.8564                                                                                        | Comment                | Dr.Mustafa Sample : RAD-345 DMSO PROTON DMSO (D:Magdy) nmr 14 |
| Date                                                                    | 18 Jun 2015 14:45:52                                                                          | Date Stamp             | 18 Jun 2015 14:45:52                                          |
| File Name                                                               | E:\Mustafa Alaraby Project\Oxazolone NMR\NMR final oxazolone\MUSTAFA RAD-345 18-06-2015\10\1d |                        |                                                               |
| Nucleus                                                                 | <sup>1</sup> H                                                                                | Number of Transients   | 32                                                            |
| Owner                                                                   | nmr                                                                                           | Points Count           | 32768                                                         |
| SWH(cyclical) (Hz)                                                      | 12335.53                                                                                      | Pulse Sequence         | zg30                                                          |
| Sweep Width (Hz)                                                        | 12335.15                                                                                      | Solvent                | DMSO-d6                                                       |
|                                                                         |                                                                                               | Spectrum Offset (Hz)   | 3706.1750                                                     |
|                                                                         |                                                                                               | Receiver Gain          | 144.00                                                        |
|                                                                         |                                                                                               | Temperature (degree C) | 25.000                                                        |
|                                                                         |                                                                                               | Spectrum Type          | STANDARD                                                      |

<sup>1</sup>H NMR (600 MHz, DMSO-d<sub>6</sub>) δ 9.54 (br. s., 1H), 7.99 (t, *J* = 5.83 Hz, 1H), 7.63 - 7.68 (m, 2H), 7.43 (d, *J* = 3.39 Hz, 1H), 7.19 (d, *J* = 1.88 Hz, 1H), 7.13 - 7.16 (m, 1H), 7.04 (s, 1H), 6.98 (dd, *J* = 1.88, 8.28 Hz, 1H), 6.76 (d, *J* = 7.91 Hz, 1H), 6.66 (d, *J* = 15.81 Hz, 1H), 3.69 (s, 3H), 3.08 - 3.12 (m, 2H), 1.46 (sxt, *J* = 7.23 Hz, 2H), 0.84 - 0.87 (m, 3H)

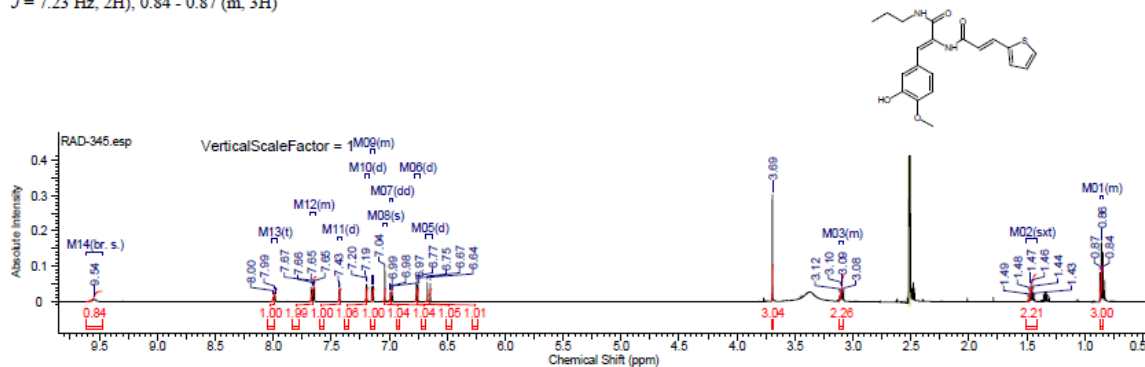

## Spectra of (3712)

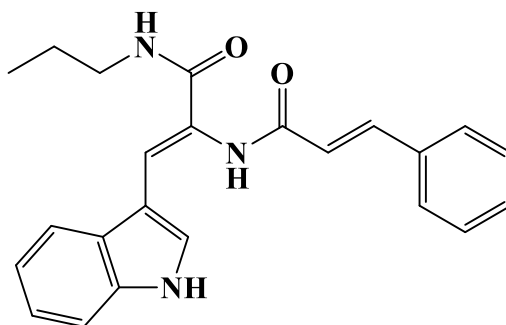

## LC/MS

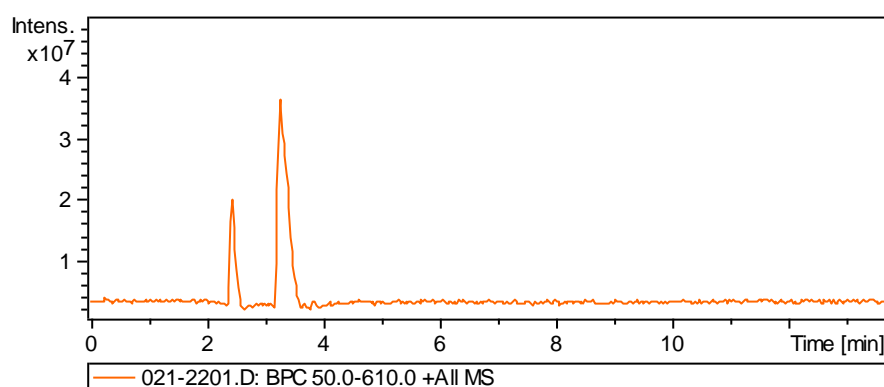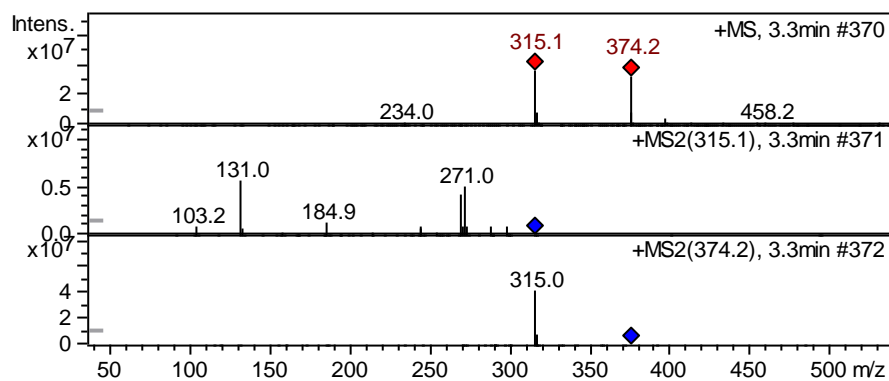

## FT-IR

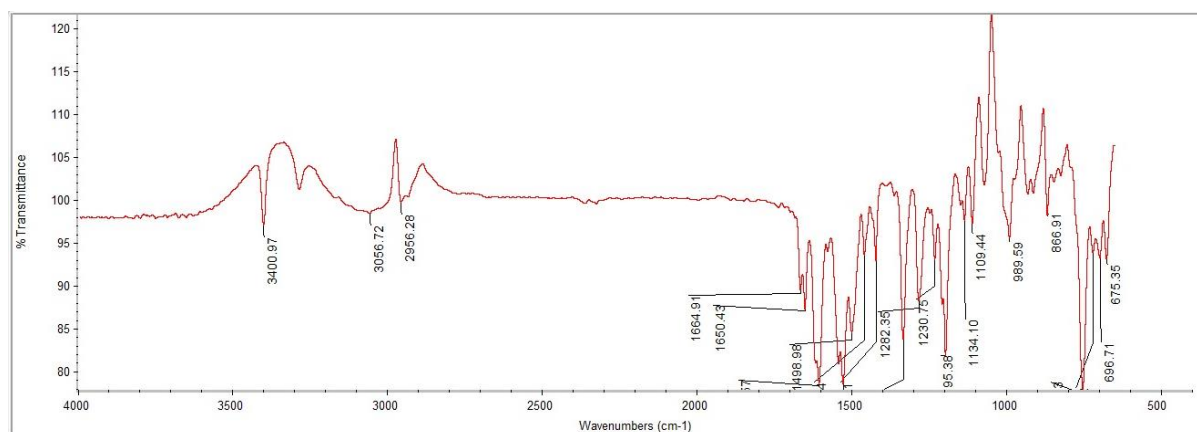



# Supplementary Information

## <sup>1</sup>H NMR

This report was created by ACD/NMR Processor Academic Edition. For more information go to [www.acdlabs.com/nmrproc/](http://www.acdlabs.com/nmrproc/)

### RAD-351

08/11/2016 11:40:25 AM  
Dr.Mustafa Sample : RAD-351 DMSO PROTON DMSO (D<sub>2</sub>O) nmr 30

|                                                                       |  |                                                                                               |                                                                                |                                 |
|-----------------------------------------------------------------------|--|-----------------------------------------------------------------------------------------------|--------------------------------------------------------------------------------|---------------------------------|
| Formula C <sub>21</sub> H <sub>20</sub> N <sub>2</sub> O <sub>2</sub> |  | FW                                                                                            | 373.4476                                                                       |                                 |
| Acquisition Time (sec)                                                |  | 2.6564                                                                                        | Comment Dr.Mustafa Sample : RAD-351 DMSO PROTON DMSO (D <sub>2</sub> O) nmr 30 |                                 |
| Date                                                                  |  | 18 Jun 2015 10:09:04                                                                          |                                                                                | Date Stamp 18 Jun 2015 10:09:04 |
| File Name                                                             |  | E:\Mostafa Alaraby Project\Oxazolone NMR\NMR final oxazolone\MUSTAFA RAD-351 18-06-2015\10f1d |                                                                                |                                 |
| Nucleus                                                               |  | 1H                                                                                            | Number of Transients                                                           | 32                              |
| Owner                                                                 |  | nmr                                                                                           | Points Count                                                                   | 32768                           |
| SW (cyclical) (Hz)                                                    |  | 12335.53                                                                                      | Pulse Sequence                                                                 | zg30                            |
| Sweep Width (Hz)                                                      |  | 12335.15                                                                                      | Solvent                                                                        | DMSO-d6                         |
|                                                                       |  | Temperature (degree C)                                                                        | 25.000                                                                         | Spectrum Offset (Hz) 3706.1750  |
|                                                                       |  |                                                                                               | Receiver Gain                                                                  | 144.00                          |
|                                                                       |  |                                                                                               | Spectrum Type                                                                  | STANDARD                        |

<sup>1</sup>H NMR (600 MHz, DMSO-d<sub>6</sub>) δ 11.56 (br. s., 1H), 9.46 (s, 1H), 7.98 (t, J = 5.83 Hz, 1H), 7.74 (d, J = 7.91 Hz, 1H), 7.63 - 7.67 (m, 3H), 7.42 - 7.55 (m, 5H), 7.17 (t, J = 7.53 Hz, 1H), 7.12 (t, J = 7.53 Hz, 1H), 6.98 (d, J = 15.81 Hz, 1H), 3.14 (q, J = 6.53 Hz, 2H), 1.50 (sxt, J = 7.23 Hz, 2H), 0.88 (t, J = 7.34 Hz, 3H)

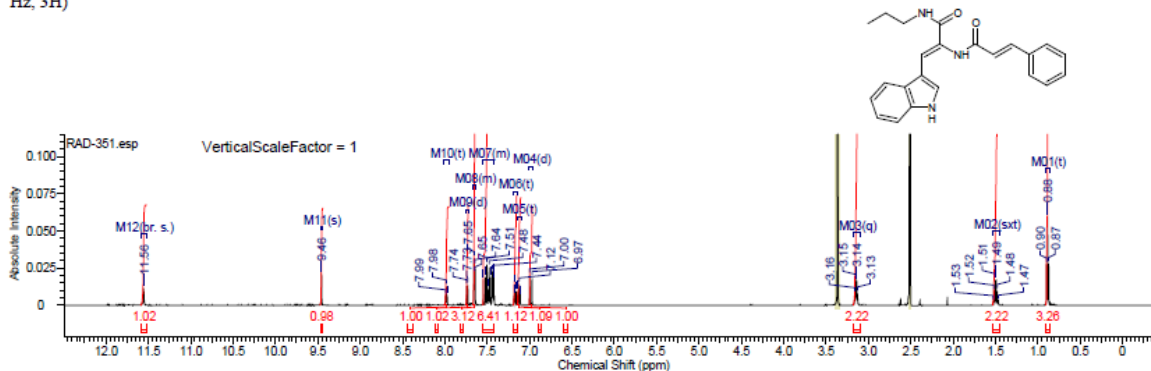

## <sup>13</sup>C NMR

This report was created by ACD/NMR Processor Academic Edition. For more information go to [www.acdlabs.com/nmrproc/](http://www.acdlabs.com/nmrproc/)

### RAD-351

25/09/2016 3:26:58 PM  
Dr.Mustafa Sample : RAD-351 DMSO

|                                                                       |          |                                                                                                                                        |                                   |                        |
|-----------------------------------------------------------------------|----------|----------------------------------------------------------------------------------------------------------------------------------------|-----------------------------------|------------------------|
| Formula C <sub>21</sub> H <sub>20</sub> N <sub>2</sub> O <sub>2</sub> |          | FW                                                                                                                                     | 373.4476                          |                        |
| Acquisition Time (sec)                                                |          | 0.8423                                                                                                                                 | Comment                           |                        |
| Date Stamp                                                            |          | 22 Apr 2016 15:05:20                                                                                                                   | Dr.Moustafa Sample : RAD-351 DMSO |                        |
| File Name                                                             |          | E:\Projects\Mostafa Alaraby Project\Oxazolone\Oxazolone NMR\NMR final oxazolone\13 CNMR New 18-4-2016\MUSTAFA RAD-351 21-04-2016\30f1d |                                   |                        |
| Frequency (MHz)                                                       | 213.77   | Nucleus                                                                                                                                | 13C                               | Number of Transients   |
| Original Points Count                                                 | 32768    | Owner                                                                                                                                  | nmr                               | Points Count           |
| Receiver Gain                                                         | 188.93   | SW (cyclical) (Hz)                                                                                                                     | 51020.41                          | Solvent                |
| Spectrum Type                                                         | STANDARD | Sweep Width (Hz)                                                                                                                       | 51018.85                          | Temperature (degree C) |
|                                                                       |          |                                                                                                                                        |                                   | 25.000                 |

<sup>13</sup>C NMR (125 MHz, DMSO-d<sub>6</sub>) δ 164.5, 164.2, 141.5, 135.5, 134.8, 129.6, 129.3, 129.1, 129.0, 128.7, 127.9, 124.9, 124.6, 122.1, 120.0, 118.2, 111.9, 110.0, 41.0, 39.8, 39.7, 39.6, 39.4, 39.3, 39.2, 22.3, 11.5

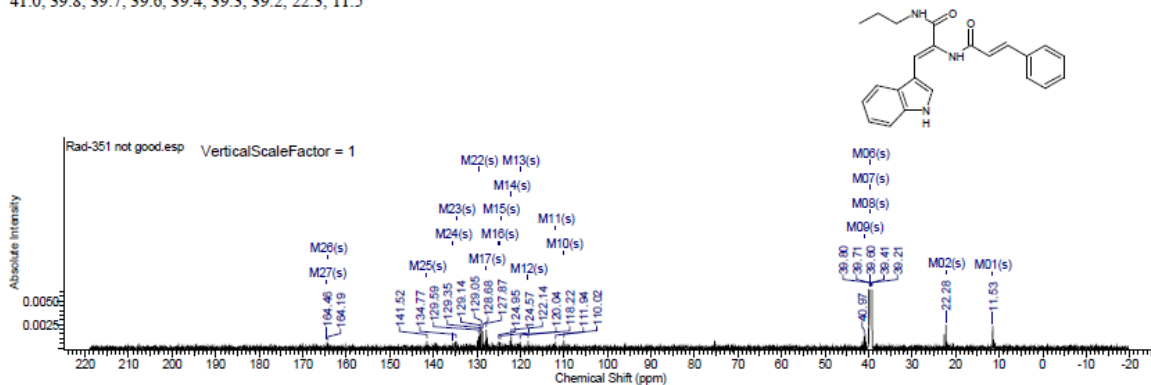

## Spectra of (3812)

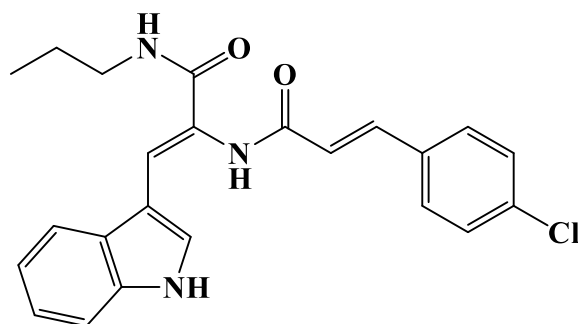

## LC/MS

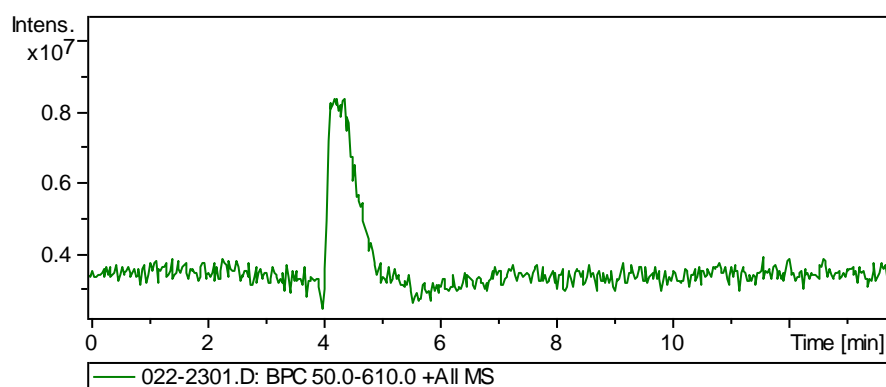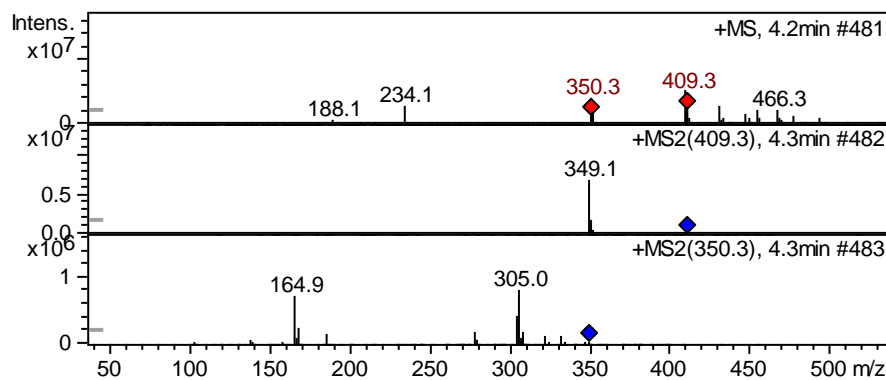

## FT-IR

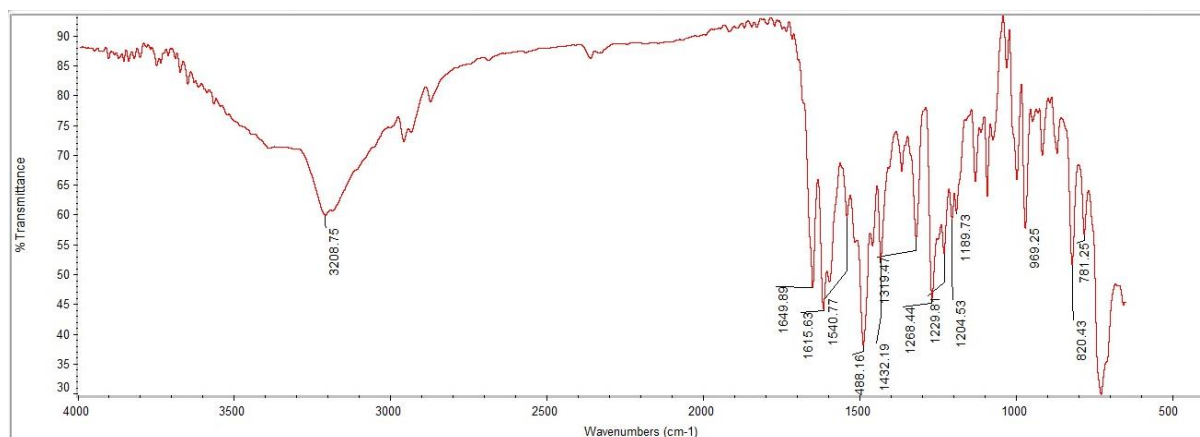

# Supplementary Information

## <sup>1</sup>H NMR

This report was created by ACD/NMR Processor Academic Edition. For more information go to [www.acdlabs.com/nmrproc/](http://www.acdlabs.com/nmrproc/)

### RAD-352

08/11/2016 11:51:59 AM  
Dr.Mustafa Sample : RAD-352 DMSO PROTON DMSO (D:Magdy) nmr 35

|                                                                                                         |                                                                       |
|---------------------------------------------------------------------------------------------------------|-----------------------------------------------------------------------|
| Formula C <sub>21</sub> H <sub>21</sub> ClN <sub>3</sub> O <sub>2</sub>                                 | FW 407.8027                                                           |
| Acquisition Time (sec) 2.6564                                                                           | Comment Dr.Mustafa Sample : RAD-352 DMSO PROTON DMSO (D:Magdy) nmr 35 |
| Date 18 Jun 2015 16:34:40                                                                               | Date Stamp 18 Jun 2015 16:34:40                                       |
| File Name E:\Mostafa Alaraby Project\Oxazolone NMR\NMR final oxazolone\MUSTAFA RAD-352 18-06-2015\10f1d | Frequency (MHz) 600.15                                                |
| Nucleus 1H                                                                                              | Number of Transients 32                                               |
| Owner nmr                                                                                               | Points Count 32768                                                    |
| SWH (Hz) 12335.63                                                                                       | Solvent DMSO-d6                                                       |
| Sweep Width (Hz) 12335.15                                                                               | Temperature (degree C) 25.000                                         |
|                                                                                                         | Origin spect                                                          |
|                                                                                                         | Original Points Count 32768                                           |
|                                                                                                         | Pulse Sequence zg30                                                   |
|                                                                                                         | Receiver Gain 144.00                                                  |
|                                                                                                         | Spectrum Offset (Hz) 3706.1750                                        |
|                                                                                                         | Spectrum Type STANDARD                                                |

<sup>1</sup>H NMR (600 MHz, DMSO-d<sub>6</sub>) δ 11.56 (br. s., 1H), 9.47 (s, 1H), 7.98 (t, *J* = 5.83 Hz, 1H), 7.73 (d, *J* = 7.91 Hz, 1H), 7.68 (d, *J* = 8.66 Hz, 2H), 7.65 (d, *J* = 2.63 Hz, 1H), 7.50 - 7.56 (m, 3H), 7.43 (d, *J* = 7.91 Hz, 1H), 7.17 (t, *J* = 7.15 Hz, 1H), 7.12 (t, *J* = 7.34 Hz, 1H), 6.98 (d, *J* = 15.81 Hz, 1H), 3.14 (q, *J* = 6.53 Hz, 2H), 1.50 (sxt, *J* = 7.30 Hz, 2H), 0.88 (t, *J* = 7.53 Hz, 3H)

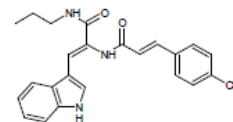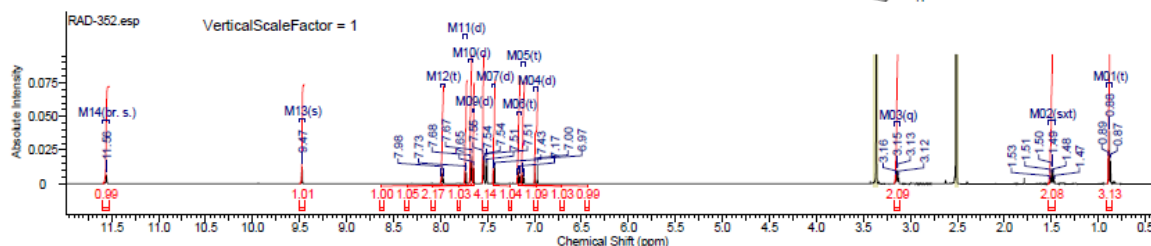

## <sup>13</sup>C NMR

This report was created by ACD/NMR Processor Academic Edition. For more information go to [www.acdlabs.com/nmrproc/](http://www.acdlabs.com/nmrproc/)

### RAD-352

25/09/2016 3:33:14 PM  
Dr.Moustafa Sample : RAD-352 DMSO

|                                                                                                                                                  |                                           |
|--------------------------------------------------------------------------------------------------------------------------------------------------|-------------------------------------------|
| Formula C <sub>21</sub> H <sub>21</sub> ClN <sub>3</sub> O <sub>2</sub>                                                                          | FW 407.8027                               |
| Acquisition Time (sec) 0.8423                                                                                                                    | Comment Dr.Moustafa Sample : RAD-352 DMSO |
| Date Stamp 21 Apr 2016 11:25:36                                                                                                                  | Date 21 Apr 2016 11:25:36                 |
| File Name E:\Projects\Mostafa Alaraby Project\Oxazolone\Oxazolone NMR\NMR final oxazolone\13 CNMR New 18-4-2016\MUSTAFA RAD-352 21-04-2016\10f1d | Frequency (MHz) 125.77                    |
| Nucleus 13C                                                                                                                                      | Number of Transients 12288                |
| Original Points Count 32768                                                                                                                      | Points Count 32768                        |
| Owner nmr                                                                                                                                        | Pulse Sequence zgpg30                     |
| Receiver Gain 186.83                                                                                                                             | Solvent DMSO-d6                           |
| SWH (Hz) 51020.41                                                                                                                                | Spectrum Offset (Hz) 21516.4648           |
| Sweep Width (Hz) 51018.85                                                                                                                        | Temperature (degree C) 24.999             |

<sup>13</sup>C NMR (125 MHz, DMSO-d<sub>6</sub>) δ 165.7, 165.3, 140.5, 138.1, 135.7, 134.2, 132.3, 132.2, 130.7, 130.6, 130.5, 130.1, 129.8, 125.1, 123.9, 122.7, 113.7, 111.5, 110.1, 41.6, 39.8, 39.7, 39.6, 39.4, 39.3, 39.2, 23.0, 11.6

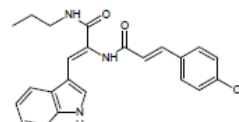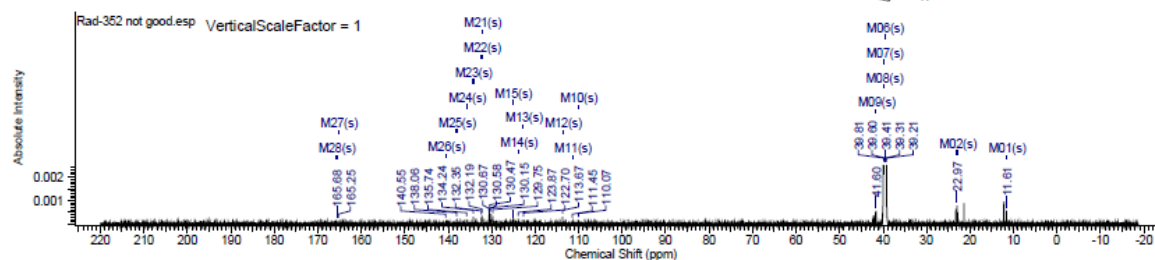

## Spectra of (3912)

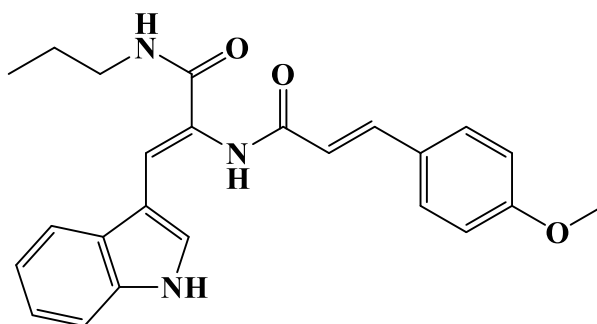

## LC/MS

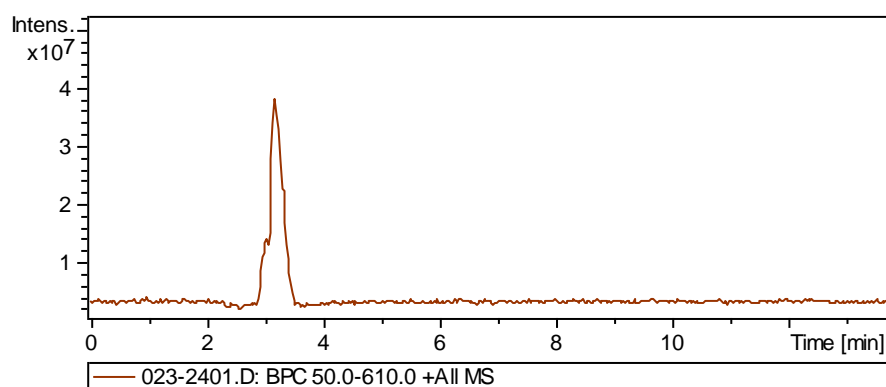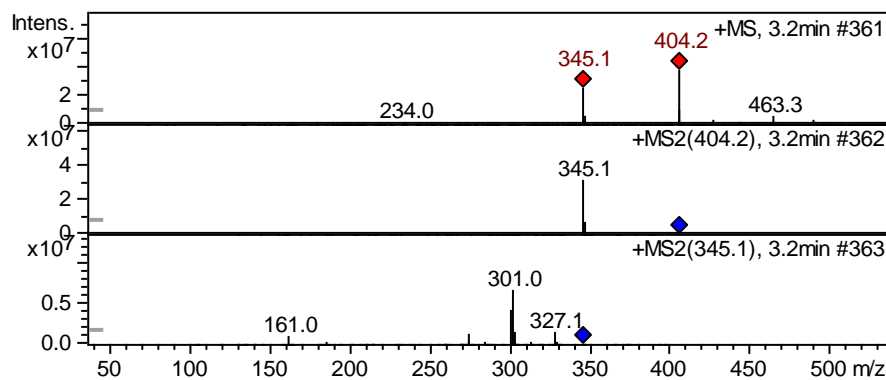

## FT-IR

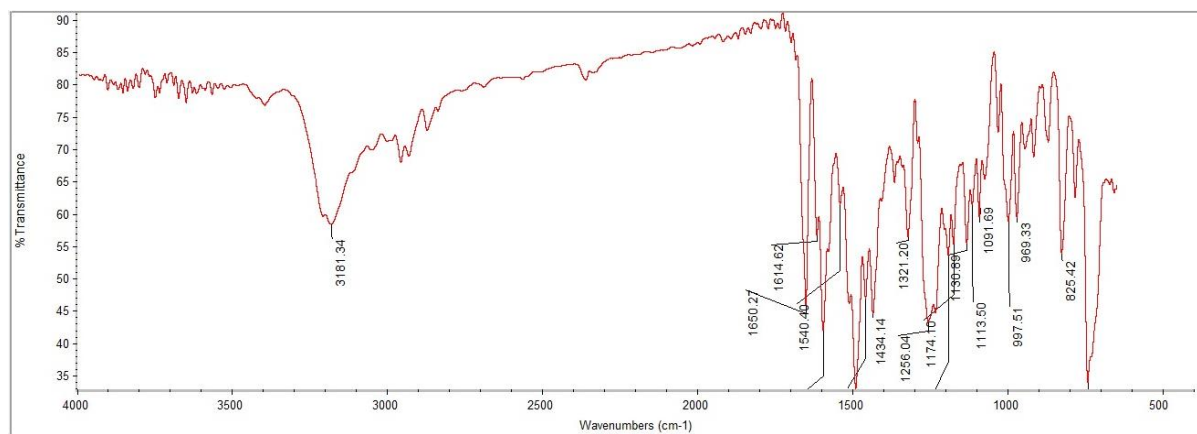

# Supplementary Information

## <sup>1</sup>H NMR

This report was created by ACD/NMR Processor Academic Edition. For more information go to [www.acdlabs.com/nmrproc/](http://www.acdlabs.com/nmrproc/)

### RAD-353

09/11/2016 7:58:16 AM  
Dr.Moustafa Sample : RAD-353 DMSO PROTON DMSO (D<sub>2</sub>O) nmr 28

|                                                                       |                                                                                               |                        |                     |                      |                                     |                       |          |
|-----------------------------------------------------------------------|-----------------------------------------------------------------------------------------------|------------------------|---------------------|----------------------|-------------------------------------|-----------------------|----------|
| Formula C <sub>24</sub> H <sub>24</sub> N <sub>2</sub> O <sub>4</sub> | FW                                                                                            | 403.4736               |                     |                      |                                     |                       |          |
| Acquisition Time (sec)                                                | 2.8564                                                                                        | Comment                | Dr.Mustafa Sample : | RAD-353              | DMSO PROTON DMSO (D <sub>2</sub> O) | nmr 28                |          |
| Date                                                                  | 18 Jun 2015 15:58:24                                                                          | Date Stamp             |                     |                      | 18 Jun 2015 15:58:24                |                       |          |
| File Name                                                             | E:\Mostafa Alaraby Project\Oxazolone NMR\NMR final oxazolone\MUSTAFA RAD-353 18-06-2015\10fid |                        |                     |                      | Frequency (MHz)                     | 800.15                |          |
| Nucleus                                                               | 1H                                                                                            | Number of Transients   | 32                  | Origin               | spect                               | Original Points Count | 32768    |
| Owner                                                                 | nmr                                                                                           | Points Count           | 32768               | Pulse Sequence       | zgpg30                              | Receiver Gain         | 144.00   |
| SW(cyclical) (Hz)                                                     | 12335.53                                                                                      | Solvent                | DMSO-d6             | Spectrum Offset (Hz) | 3706.1750                           | Spectrum Type         | STANDARD |
| Sweep Width (Hz)                                                      | 12335.15                                                                                      | Temperature (degree C) | 25.000              |                      |                                     |                       |          |

<sup>1</sup>H NMR (600 MHz, DMSO-d<sub>6</sub>) δ 11.55 (br. s., 1H), 9.36 (s, 1H), 7.95 (t, J = 5.83 Hz, 1H), 7.73 (d, J = 7.91 Hz, 1H), 7.64 (d, J = 2.26 Hz, 1H), 7.60 (d, J = 8.66 Hz, 2H), 7.46 - 7.50 (m, 2H), 7.43 (d, J = 7.91 Hz, 1H), 7.17 (t, J = 7.53 Hz, 1H), 7.12 (t, J = 7.53 Hz, 1H), 7.03 (d, J = 8.66 Hz, 2H), 6.84 (d, J = 15.81 Hz, 1H), 3.82 (s, 3H), 3.14 (q, J = 6.27 Hz, 2H), 1.49 (sxt, J = 7.23 Hz, 2H), 0.88 (t, J = 7.34 Hz, 3H)

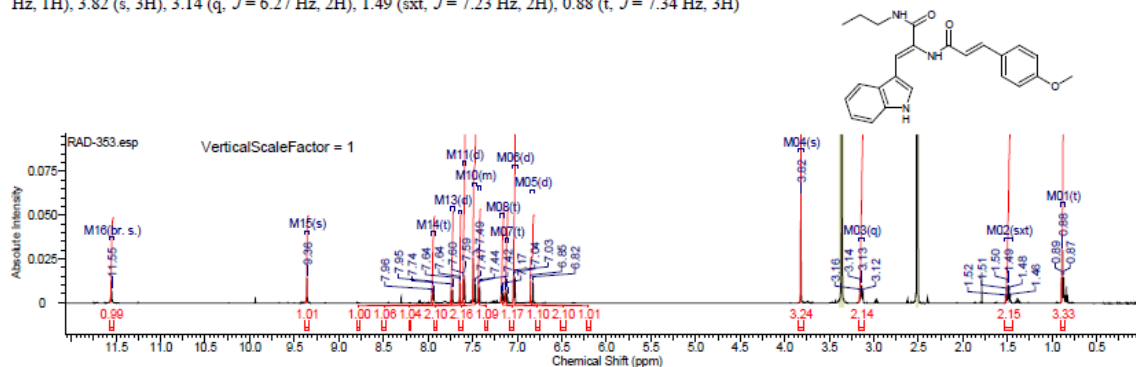

## <sup>13</sup>C NMR

This report was created by ACD/NMR Processor Academic Edition. For more information go to [www.acdlabs.com/nmrproc/](http://www.acdlabs.com/nmrproc/)

### RAD-353

25/09/2016 3:40:24 PM  
Dr.Moustafa Sample : RAD-353 DMSO

|                                                                       |                                                                                                                                        |                        |                                   |                      |
|-----------------------------------------------------------------------|----------------------------------------------------------------------------------------------------------------------------------------|------------------------|-----------------------------------|----------------------|
| Formula C <sub>24</sub> H <sub>24</sub> N <sub>2</sub> O <sub>4</sub> | FW                                                                                                                                     | 403.4736               |                                   |                      |
| Acquisition Time (sec)                                                | 0.6423                                                                                                                                 | Comment                | Dr Moustafa Sample : RAD-353 DMSO | Date                 |
| Date Stamp                                                            | 23 Apr 2016 09:43:12                                                                                                                   |                        |                                   | 23 Apr 2016 09:43:12 |
| File Name                                                             | E:\Projects\Mostafa Alaraby Project\Oxazolone\Oxazolone NMR\NMR final oxazolone\13 CNMR New 18-4-2016\MUSTAFA RAD-353 21-04-2016\50fid |                        |                                   |                      |
| Frequency (MHz)                                                       | 213.77                                                                                                                                 | Nucleus                | 13C                               | Number of Transients |
| Original Points Count                                                 | 32768                                                                                                                                  | Owner                  | nmr                               | 12288                |
| Points Count                                                          | 32768                                                                                                                                  | Pulse Sequence         | zgpg30                            | Origin               |
| Receiver Gain                                                         | 186.93                                                                                                                                 | SW (cyclical) (Hz)     | 51020.41                          | Spectrum Sequence    |
| Spectrum Type                                                         | STANDARD                                                                                                                               | Solvent                | DMSO-d6                           | 21287.5840           |
|                                                                       |                                                                                                                                        | Spectrum Offset (Hz)   | 21287.5840                        |                      |
|                                                                       |                                                                                                                                        | Sweep Width (Hz)       | 51018.85                          |                      |
|                                                                       |                                                                                                                                        | Temperature (degree C) | 25.002                            |                      |

<sup>13</sup>C NMR (214 MHz, DMSO-d<sub>6</sub>) δ 166.0, 164.3, 160.6, 141.5, 138.5, 137.1, 132.3, 131.9, 131.4, 129.2, 123.5, 122.2, 121.0, 120.6, 114.6, 113.9, 112.5, 112.3, 55.8, 41.5, 39.8, 39.7, 39.6, 39.4, 39.3, 39.2, 22.6, 11.5

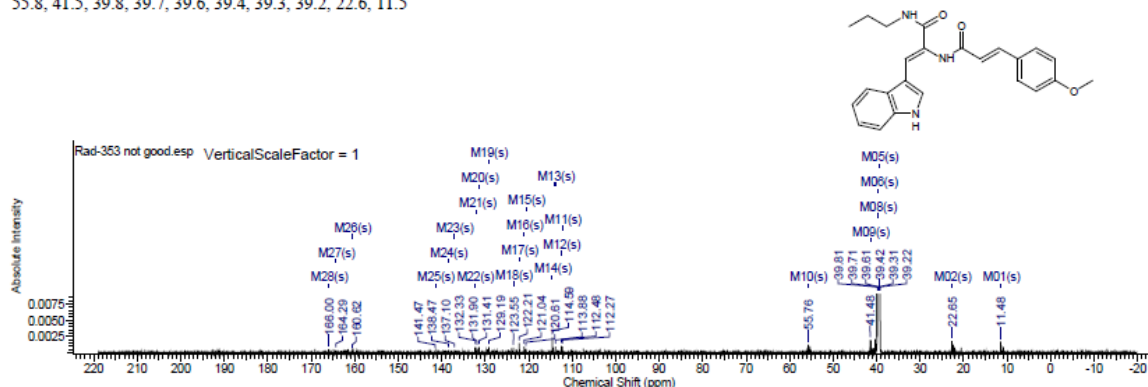

## Spectra of (4012)

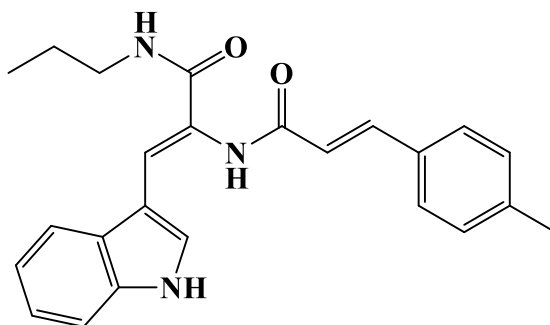

## LC/MS

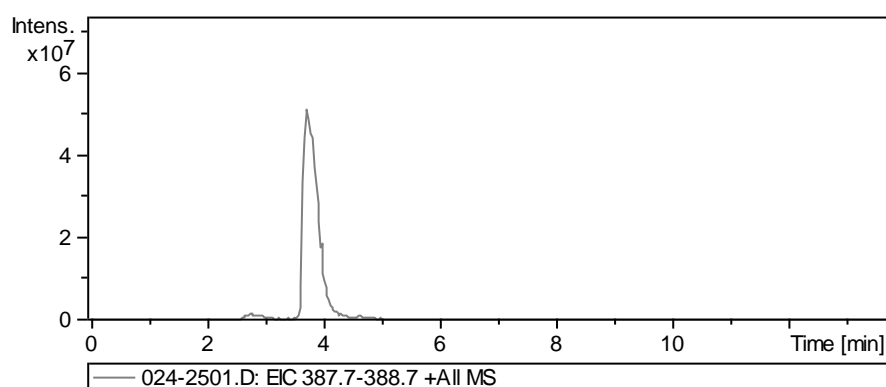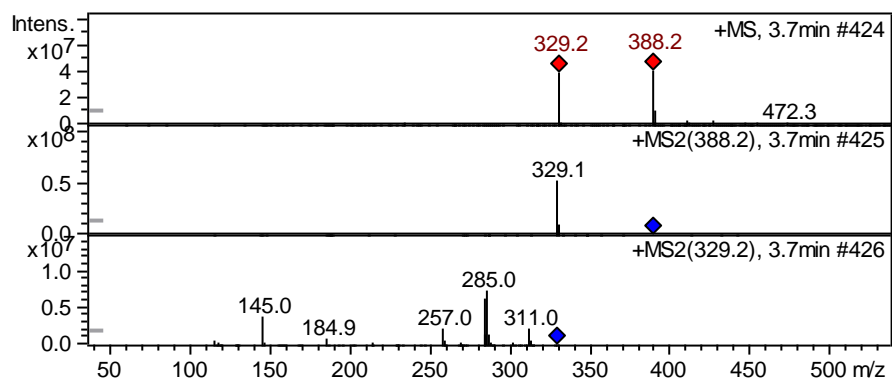

## FT-IR

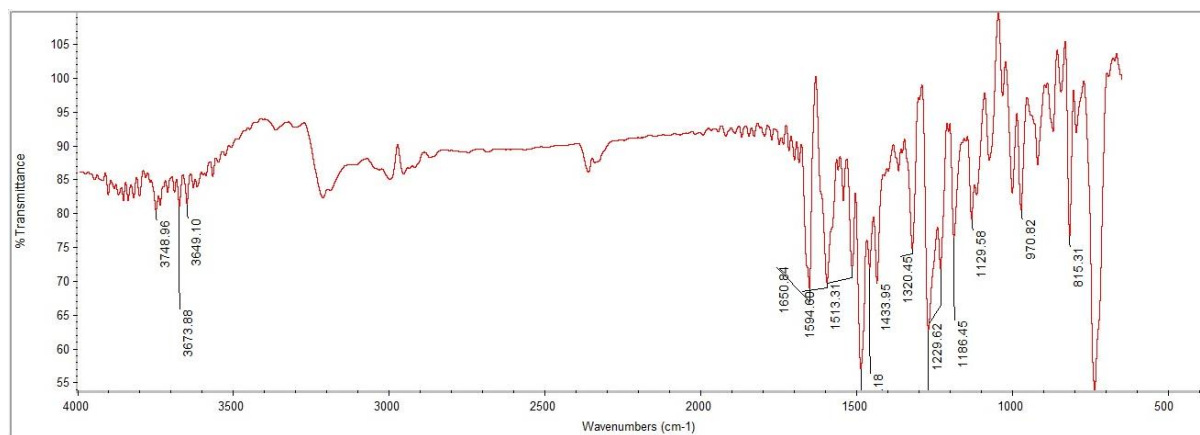

# Supplementary Information

## <sup>1</sup>H NMR

This report was created by ACD/NMR Processor Academic Edition. For more information go to [www.acdlabs.com/nmrproc/](http://www.acdlabs.com/nmrproc/)

### RAD-354

09/11/2016 8:10:30 AM

Dr.Mustafa Sample : RAD-354 DMSO PROTON DMSO (D:Magdy) nmr 29

|                                                                       |  |                                                                                                |                                                                       |         |                      |           |
|-----------------------------------------------------------------------|--|------------------------------------------------------------------------------------------------|-----------------------------------------------------------------------|---------|----------------------|-----------|
| Formula C <sub>22</sub> H <sub>20</sub> N <sub>2</sub> O <sub>2</sub> |  | FW                                                                                             | 387.4742                                                              |         |                      |           |
| Acquisition Time (sec)                                                |  | 2.6564                                                                                         | Comment Dr.Mustafa Sample : RAD-354 DMSO PROTON DMSO (D:Magdy) nmr 29 |         |                      |           |
| Date                                                                  |  | 18 Jun 2015 16:04:48                                                                           | Date Stamp 18 Jun 2015 16:04:48                                       |         |                      |           |
| File Name                                                             |  | E:\Mostafa Alaraby Project\Oxazolone NMR\NMR final oxazolone\MUSTAFA RAD-354 18-06-2015\10.fid |                                                                       |         | Frequency (MHz)      | 600.15    |
| Nucleus                                                               |  | 1H                                                                                             | Number of Transients                                                  | 32      | Origin               | spect     |
| Owner                                                                 |  | nmr                                                                                            | Points Count                                                          | 32768   | Pulse Sequence       | zg30      |
| SW(cyclical) (Hz)                                                     |  | 12335.53                                                                                       | Solvent                                                               | DMSO-d6 | Receiver Gain        | 114.00    |
| Sweep Width (Hz)                                                      |  | 12335.15                                                                                       | Temperature (degree C)                                                | 25.000  | Spectrum Offset (Hz) | 3708.1750 |
|                                                                       |  |                                                                                                |                                                                       |         | Spectrum Type        | STANDARD  |

<sup>1</sup>H NMR (600 MHz, DMSO-d<sub>6</sub>) δ 11.56 (br. s., 1H), 9.42 (s, 1H), 7.97 (t, *J* = 5.83 Hz, 1H), 7.73 (d, *J* = 7.91 Hz, 1H), 7.65 (s, 1H), 7.52 - 7.56 (m, *J* = 7.91 Hz, 2H), 7.47 - 7.52 (m, 2H), 7.43 (d, *J* = 7.91 Hz, 1H), 7.26 - 7.30 (m, *J* = 7.91 Hz, 2H), 7.15 - 7.18 (m, 1H), 7.11 - 7.14 (m, 1H), 6.93 (d, *J* = 15.81 Hz, 1H), 3.14 (q, *J* = 6.40 Hz, 2H), 2.36 (s, 3H), 1.50 (sxt, *J* = 7.30 Hz, 2H), 0.88 (t, *J* = 7.53 Hz, 3H)

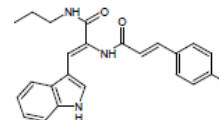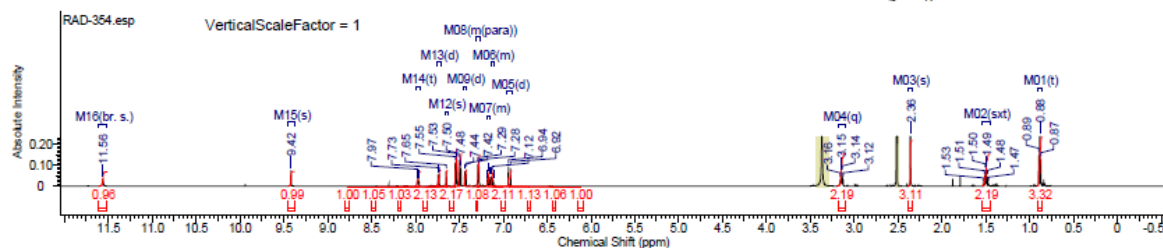

## <sup>13</sup>C NMR

This report was created by ACD/NMR Processor Academic Edition. For more information go to [www.acdlabs.com/nmrproc/](http://www.acdlabs.com/nmrproc/)

### RAD-354

25/09/2016 3:51:57 PM

Dr.Mustafa Sample : RAD-354 DMSO

|                                                                       |                                                                                                                                         |                   |                                   |                        |         |                      |            |
|-----------------------------------------------------------------------|-----------------------------------------------------------------------------------------------------------------------------------------|-------------------|-----------------------------------|------------------------|---------|----------------------|------------|
| Formula C <sub>22</sub> H <sub>20</sub> N <sub>2</sub> O <sub>2</sub> | FW                                                                                                                                      | 387.4742          |                                   |                        |         |                      |            |
| Acquisition Time (sec)                                                | 0.6423                                                                                                                                  | Comment           | Dr. Mostafa Sample : RAD-354 DMSO |                        |         |                      |            |
| Date Stamp                                                            | 19 Apr 2016 17:45:20                                                                                                                    |                   | Date                              | 19 Apr 2016 17:45:20   |         |                      |            |
| File Name                                                             | E:\Projects\Mostafa Alaraby Project\Oxazolone\Oxazolone NMR\NMR final oxazolone\13 CNMR New 18-4-2016\MUSTAFA RAD-354 19-04-2016\20.fid |                   |                                   |                        |         |                      |            |
| Frequency (MHz)                                                       | 213.77                                                                                                                                  | Nucleus           | 13C                               | Number of Transients   | 3500    | Origin               | specot     |
| Original Points Count                                                 | 32768                                                                                                                                   | Owner             | nmr                               | Points Count           | 32768   | Pulse Sequence       | zgpg30     |
| Receiver Gain                                                         | 186.93                                                                                                                                  | SW(cyclical) (Hz) | 51020.41                          | Solvent                | DMSO-d6 | Spectrum Offset (Hz) | 21289.1408 |
| Spectrum Type                                                         | STANDARD                                                                                                                                | Sweep Width (Hz)  | 51018.85                          | Temperature (degree C) | 25.000  |                      |            |

<sup>13</sup>C NMR (214 MHz, DMSO-d<sub>6</sub>) δ 165.1, 164.6, 141.5, 139.6, 135.5, 129.8, 129.6, 129.2, 127.9, 127.7, 127.6, 122.2, 121.3, 121.1, 118.2, 112.5, 111.9, 110.0, 40.9, 39.8, 39.7, 39.6, 39.4, 39.3, 39.2, 22.6, 21.0, 11.5

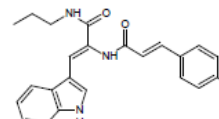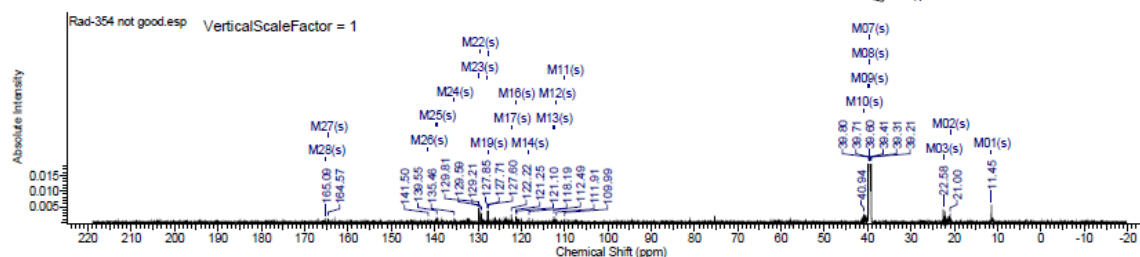

## Spectra of (4112)

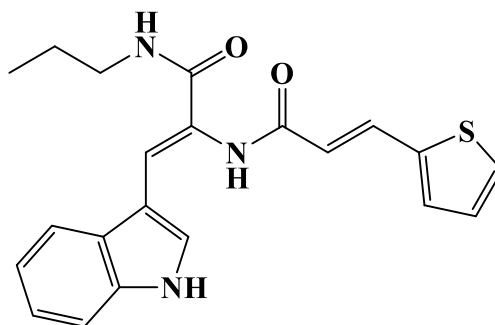

## LC/MS

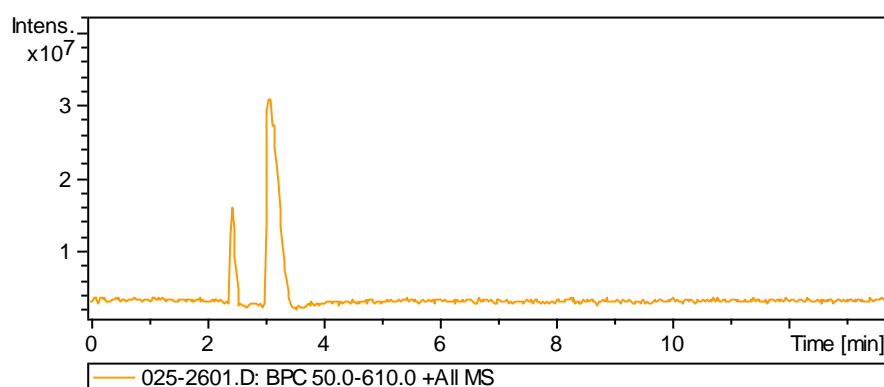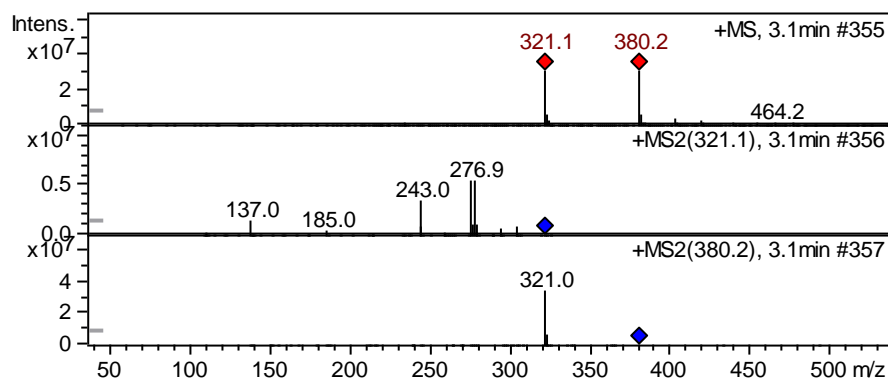

## FT-IR

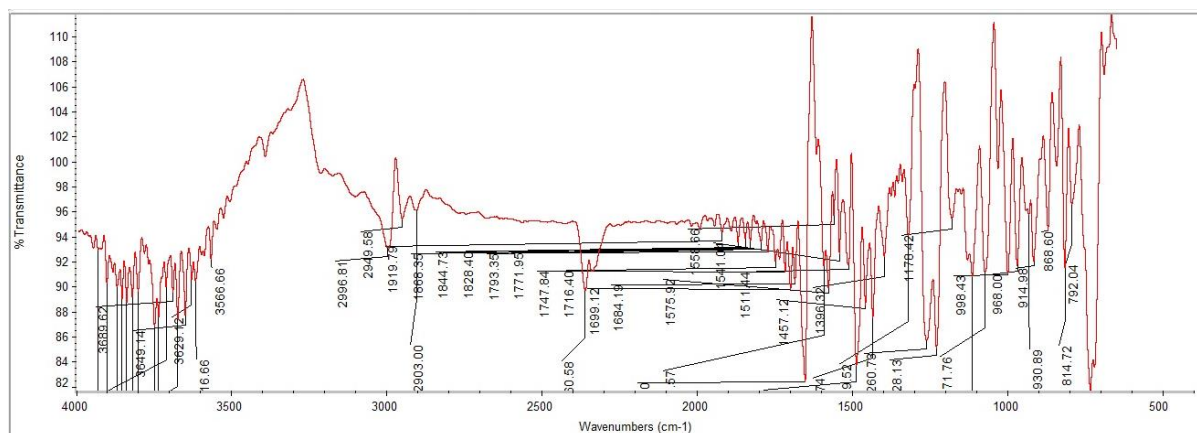



<sup>1</sup>H NMRThis report was created by ACD/NMR Processor Academic Edition. For more information go to [www.acdlabs.com/nmrproc/](http://www.acdlabs.com/nmrproc/)

## RAD-355

09/11/2016 8:15:32 AM

Dr.Mustafa Sample : RAD-355 DMSO PROTON DMSO (D:Magdy) nmr 27

|                                                                         |  |                                                                                                |                                                               |           |
|-------------------------------------------------------------------------|--|------------------------------------------------------------------------------------------------|---------------------------------------------------------------|-----------|
| Formula C <sub>18</sub> H <sub>18</sub> N <sub>2</sub> O <sub>2</sub> S |  | FW                                                                                             | 379.4753                                                      |           |
| Acquisition Time (sec)                                                  |  | 2.8564                                                                                         | Comment                                                       |           |
| Date                                                                    |  | 18 Jun 2015 15:54:08                                                                           | Dr.Mustafa Sample : RAD-355 DMSO PROTON DMSO (D:Magdy) nmr 27 |           |
| Date Stamp                                                              |  | 18 Jun 2015 15:54:08                                                                           |                                                               |           |
| File Name                                                               |  | E:\Mostafa Alaraby Project\Oxazolone NMR\NMR final oxazolone\MUSTAFA RAD-355 18-06-2015\10.fid |                                                               |           |
| Nucleus                                                                 |  | 1H                                                                                             | Number of Transients                                          | 32        |
| Owner                                                                   |  | nmr                                                                                            | Points Count                                                  | 32768     |
| SW(cyclical) (Hz)                                                       |  | 12335.53                                                                                       | Solvent                                                       | DMSO-d6   |
| Sweep Width (Hz)                                                        |  | 12335.15                                                                                       | Temperature (degree C)                                        | 25.000    |
|                                                                         |  |                                                                                                | Spectrum Offset (Hz)                                          | 3706.1750 |
|                                                                         |  |                                                                                                | Receiver Gain                                                 | 161.00    |
|                                                                         |  |                                                                                                | Spectrum Type                                                 | STANDARD  |

<sup>1</sup>H NMR (600 MHz, DMSO-d<sub>6</sub>) δ 11.56 (br. s., 1H), 9.41 (s, 1H), 7.96 (t, *J* = 5.83 Hz, 1H), 7.72 (d, *J* = 7.91 Hz, 1H), 7.65 - 7.70 (m, 2H), 7.64 (d, *J* = 1.88 Hz, 1H), 7.50 (s, 1H), 7.42 - 7.46 (m, 2H), 7.14 - 7.19 (m, 2H), 7.10 - 7.14 (m, 1H), 6.73 (d, *J* = 15.43 Hz, 1H), 3.13 (q, *J* = 6.40 Hz, 2H), 1.49 (sxt, *J* = 7.23 Hz, 2H), 0.88 (t, *J* = 7.53 Hz, 3H)

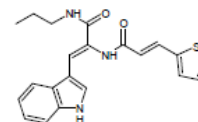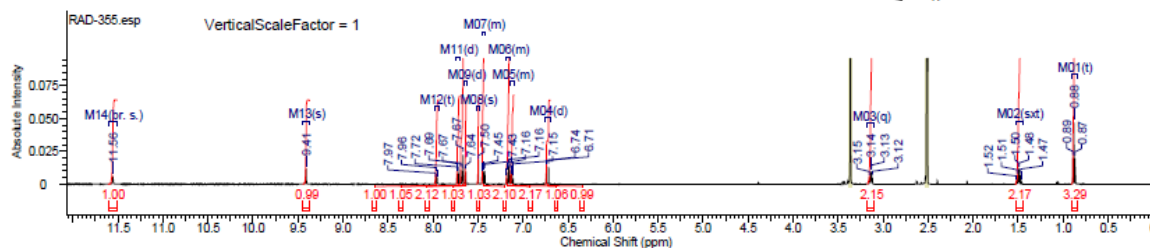<sup>13</sup>C NMRThis report was created by ACD/NMR Processor Academic Edition. For more information go to [www.acdlabs.com/nmrproc/](http://www.acdlabs.com/nmrproc/)

## RAD-355

25/09/2016 3:57:30 PM

Dr.Moustafa Sample : RAD-355 DMSO

|                                                                                                                                                   |  |                      |                   |  |                                   |                        |                      |
|---------------------------------------------------------------------------------------------------------------------------------------------------|--|----------------------|-------------------|--|-----------------------------------|------------------------|----------------------|
| Formula C <sub>18</sub> H <sub>18</sub> N <sub>2</sub> O <sub>2</sub> S                                                                           |  | FW                   | 379.4753          |  |                                   |                        |                      |
| Acquisition Time (sec)                                                                                                                            |  | 0.6423               | Comment           |  | Dr.Moustafa Sample : RAD-355 DMSO | Date                   | 23 Apr 2016 00:24:16 |
| Date Stamp                                                                                                                                        |  | 23 Apr 2016 00:24:16 |                   |  |                                   |                        |                      |
| File Name E:\Projects\Mostafa Alaraby Project\Oxazolone\Oxazolone NMR\NMR final oxazolone\13 CNMR New 18-4-2016\MUSTAFA RAD-355 21-04-2016\40.fid |  |                      |                   |  |                                   |                        |                      |
| Frequency (MHz)                                                                                                                                   |  | 213.77               | Nucleus           |  | <sup>13</sup> C                   | Number of Transients   | 12288                |
| Original Points Count                                                                                                                             |  | 32768                | Points Count      |  | 32768                             | Owner                  | nmr                  |
| Receiver Gain                                                                                                                                     |  | 186.93               | SW(cyclical) (Hz) |  | 51020.41                          | Solvent                | DMSO-d6              |
| Spectrum Type                                                                                                                                     |  | STANDARD             | Sweep Width (Hz)  |  | 51018.85                          | Temperature (degree C) | 25.000               |
|                                                                                                                                                   |  |                      |                   |  |                                   | Spectrum Offset (Hz)   | 21292.2539           |

<sup>13</sup>C NMR (214 MHz, DMSO-d<sub>6</sub>) δ 163.8, 163.2, 139.7, 138.1, 136.5, 136.2, 133.4, 133.3, 132.4, 129.1, 128.3, 123.6, 122.9, 122.2, 121.1, 120.6, 112.3, 107.4, 41.4, 39.8, 39.7, 39.6, 39.4, 39.3, 39.2, 22.3, 11.3

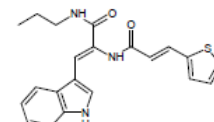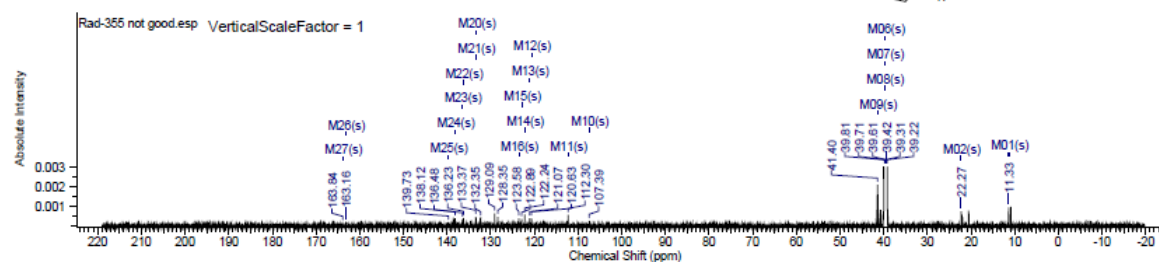

## Spectra of (4212)

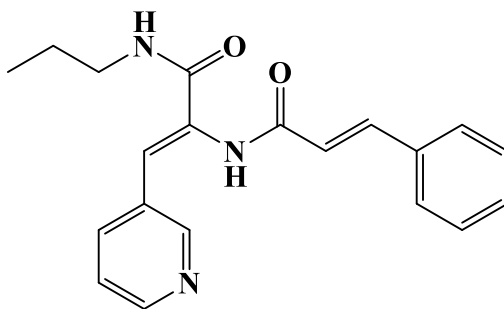

## LC/MS

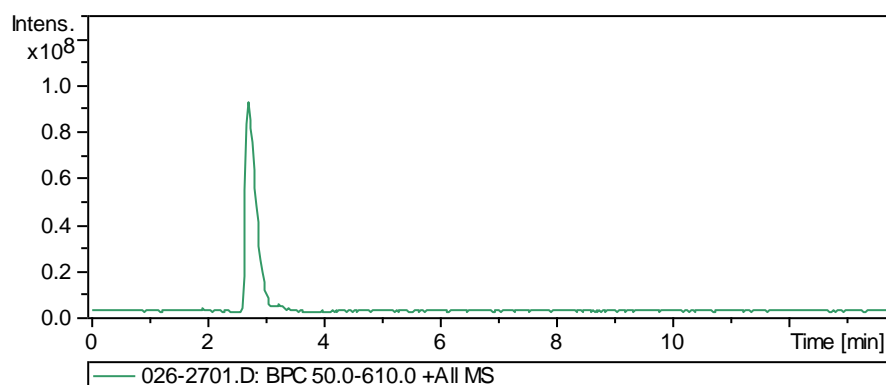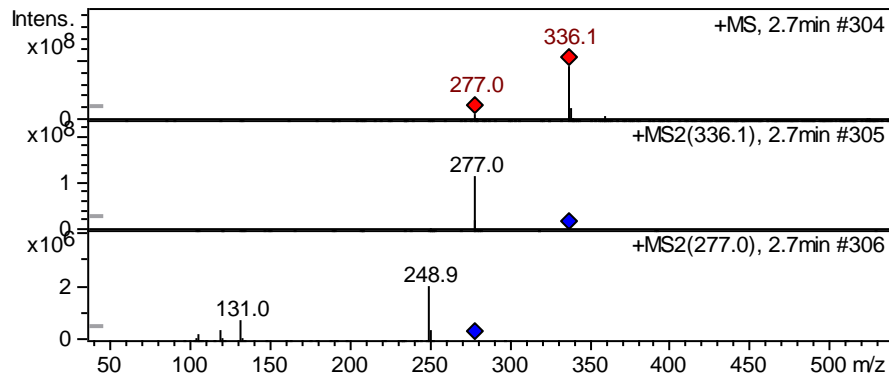

## FT-IR

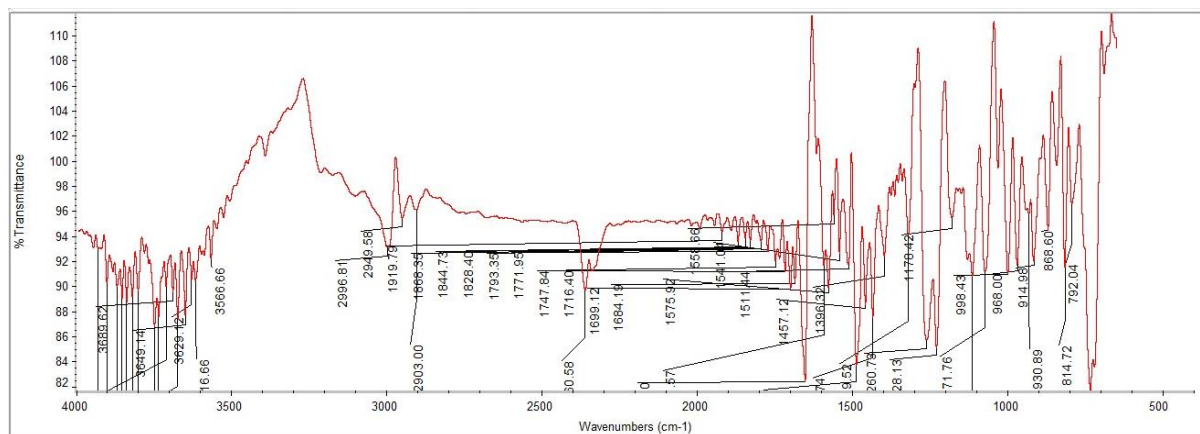<sup>1</sup>H NMR

## Supplementary Information

This report was created by ACD/NMR Processor Academic Edition. For more information go to [www.acdlabs.com/nmrproc/](http://www.acdlabs.com/nmrproc/)

### RAD-361

09/11/2016 8:21:08 AM  
Dr.Mustafa Sample : RAD-361 DMSO PROTON DMSO (D:Magdy) nmr 31

|                                                                       |  |                                                                                               |                                                                       |                 |                       |        |
|-----------------------------------------------------------------------|--|-----------------------------------------------------------------------------------------------|-----------------------------------------------------------------------|-----------------|-----------------------|--------|
| Formula C <sub>21</sub> H <sub>21</sub> N <sub>3</sub> O <sub>2</sub> |  | FW                                                                                            | 335.3996                                                              |                 |                       |        |
| Acquisition Time (sec)                                                |  | 2.6564                                                                                        | Comment Dr.Mustafa Sample : RAD-361 DMSO PROTON DMSO (D:Magdy) nmr 31 |                 |                       |        |
| Date                                                                  |  | 18 Jun 2015 16:15:28                                                                          | Date Stamp 18 Jun 2015 16:15:28                                       |                 |                       |        |
| File Name                                                             |  | E:\Mostafa Alaraby Project\Oxazolone NMR\NMR final oxazolone\MUSTAFA RAD-361 18-06-2015\10fid |                                                                       | Frequency (MHz) | 600.15                |        |
| Nucleus                                                               |  | 1H                                                                                            | Number of Transients                                                  | 32              | Original Points Count | 32768  |
| Owner                                                                 |  | nmr                                                                                           | Points Count                                                          | 32768           | Pulse Sequence        | zg30   |
| SW (Hz)                                                               |  | 12335.53                                                                                      | Solvent                                                               | DMSO-d6         | Receiver Gain         | 144.00 |
| Spectrum Offset (Hz)                                                  |  | 3706.1750                                                                                     | Spectrum Type                                                         |                 | STANDARD              |        |
| Sweep Width (Hz)                                                      |  | 12335.15                                                                                      | Temperature (degree C)                                                |                 | 25.000                |        |

<sup>1</sup>H NMR (600 MHz, DMSO-d<sub>6</sub>) δ 9.82 (s, 1H), 8.70 (d, *J* = 2.26 Hz, 1H), 8.47 (dd, *J* = 1.69, 4.71 Hz, 1H), 8.25 (t, *J* = 5.65 Hz, 1H), 7.92 (td, *J* = 1.74, 8.19 Hz, 1H), 7.60 - 7.66 (m, 2H), 7.51 (d, *J* = 15.81 Hz, 1H), 7.39 - 7.49 (m, 4H), 7.00 (s, 1H), 6.86 (d, *J* = 16.19 Hz, 1H), 3.09 - 3.17 (m, 2H), 1.49 (sxt, *J* = 7.30 Hz, 2H), 0.88 (t, *J* = 7.34 Hz, 3H)

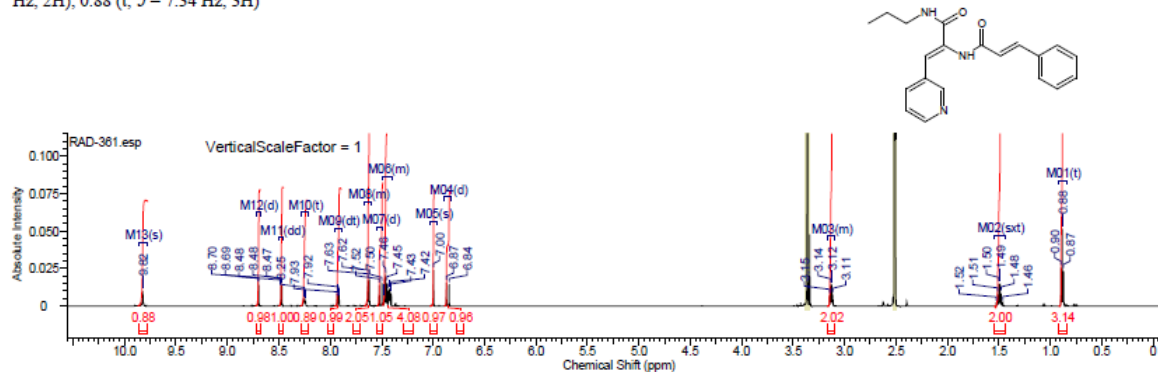

### <sup>13</sup>C NMR

This report was created by ACD/NMR Processor Academic Edition. For more information go to [www.acdlabs.com/nmrproc/](http://www.acdlabs.com/nmrproc/)

### RAD-361

20/09/2016 9:41:55 AM  
Dr.Mustafa Sample : RAD-361 DMSO

|                                                                       |                                                                                                                                         |                    |                                  |                        |                      |
|-----------------------------------------------------------------------|-----------------------------------------------------------------------------------------------------------------------------------------|--------------------|----------------------------------|------------------------|----------------------|
| Formula C <sub>21</sub> H <sub>21</sub> N <sub>3</sub> O <sub>2</sub> | FW                                                                                                                                      | 335.3996           |                                  |                        |                      |
| Acquisition Time (sec)                                                | 0.6423                                                                                                                                  | Comment            | Dr Mostafa Sample : RAD-361 DMSO | Date                   | 19 Apr 2016 11:08:32 |
| Date Stamp                                                            | 19 Apr 2016 11:08:32                                                                                                                    |                    |                                  |                        |                      |
| File Name                                                             | E:\Projects\Mostafa Alaraby Project\Oxazolone\Oxazolone NMR\NMR final oxazolone\13 CNMR New 18-4-2016\MUSTAFA RAD-361 18-04-2016\130fid |                    |                                  |                        |                      |
| Frequency (MHz)                                                       | 213.77                                                                                                                                  | Nucleus            | <sup>13</sup> C                  | Number of Transients   | 1320                 |
| Original Points Count                                                 | 32768                                                                                                                                   | Owner              | nmr                              | Points Count           | 32768                |
| Receiver Gain                                                         | 186.93                                                                                                                                  | SW (cyclical) (Hz) | 51020.41                         | Solvent                | DMSO-d6              |
| Spectrum Type                                                         | STANDARD                                                                                                                                | Sweep Width (Hz)   | 51018.85                         | Temperature (degree C) | 25.002               |
|                                                                       |                                                                                                                                         |                    |                                  | Spectrum Offset (Hz)   | 21289.1406           |

<sup>13</sup>C NMR (214 MHz, DMSO-d<sub>6</sub>) δ 164.7, 164.5, 150.1, 148.9, 140.3, 135.9, 134.7, 132.2, 130.5, 129.9, 129.1, 127.8, 123.7, 123.2, 121.4, 41.0, 39.8, 39.7, 39.6, 39.4, 39.3, 39.2, 22.4, 11.5

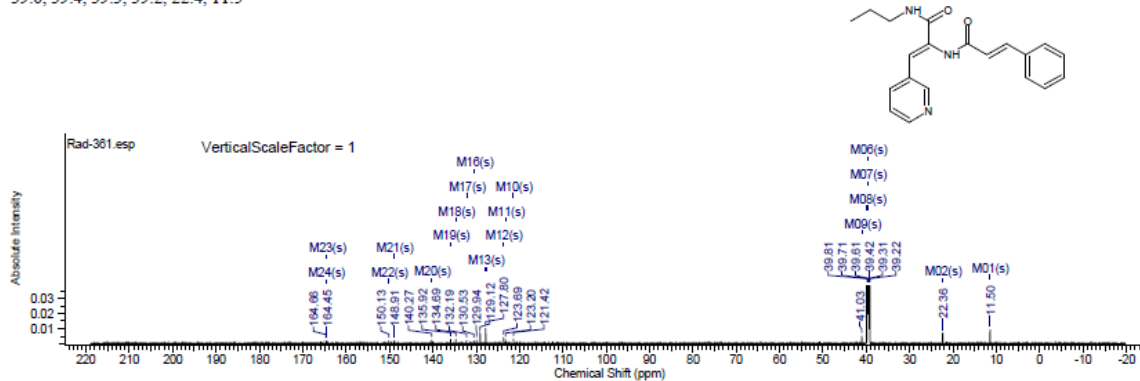

Spectra of (4312)

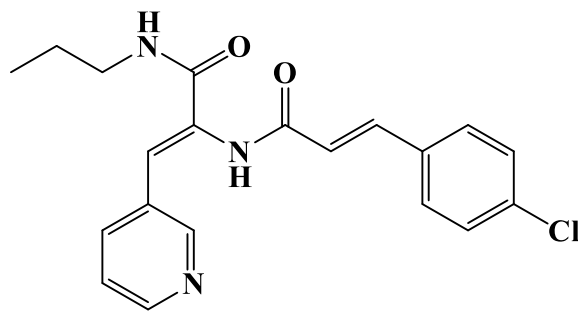

## FT-IR

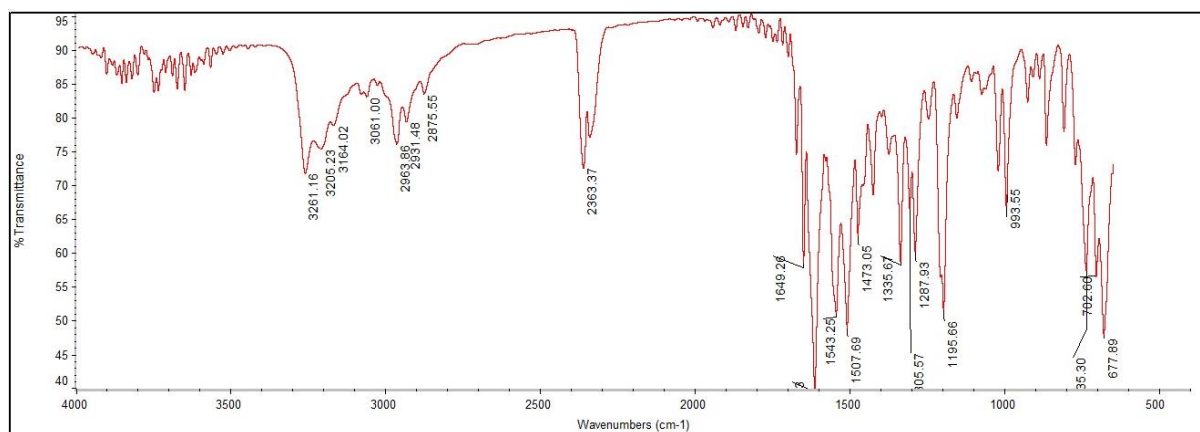<sup>1</sup>H NMR

This report was created by ACD/NMR Processor Academic Edition. For more information go to [www.acdlabs.com/nmrproc/](http://www.acdlabs.com/nmrproc/)

## RAD-362

09/11/2016 8:30:38 AM  
Dr. Mustafa Sample : RAD-362 DMSO PROTON DMSO (D:Magdy) nmr 12

|                                                                                                          |                                                                        |
|----------------------------------------------------------------------------------------------------------|------------------------------------------------------------------------|
| Formula C <sub>20</sub> H <sub>18</sub> ClN <sub>2</sub> O <sub>2</sub>                                  | FW 369.9447                                                            |
| Acquisition Time (sec) 2.6584                                                                            | Comment Dr. Mustafa Sample : RAD-362 DMSO PROTON DMSO (D:Magdy) nmr 12 |
| Date 18 Jun 2015 14:35:12                                                                                | Date Stamp 18 Jun 2015 14:35:12                                        |
| File Name E:\Mostafa Alaraby Project\Oxazolone NMR\NMR final oxazolone\MUSTAFA RAD-362 18-06-2015\10\fid | Frequency (MHz) 600.15                                                 |
| Nucleus 1H                                                                                               | Original Points Count 32768                                            |
| Owner nmr                                                                                                | Pulse Sequence zg30                                                    |
| Points Count 32768                                                                                       | Receiver Gain 181.00                                                   |
| SW (cyclical) (Hz) 12335.53                                                                              | Solvent DMSO-d6                                                        |
| Sweep Width (Hz) 12335.15                                                                                | Spectrum Offset (Hz) 3706.1750                                         |
|                                                                                                          | Spectrum Type STANDARD                                                 |
|                                                                                                          | Temperature (degree C) 25.000                                          |

<sup>1</sup>H NMR (600 MHz, DMSO-d<sub>6</sub>) δ 9.83 (br. s., 1H), 8.70 (d, *J* = 2.26 Hz, 1H), 8.47 (dd, *J* = 1.69, 4.71 Hz, 1H), 8.25 (t, *J* = 5.46 Hz, 1H), 7.92 (d, *J* = 7.91 Hz, 1H), 7.63 (d, *J* = 7.15 Hz, 2H), 7.51 (d, *J* = 15.81 Hz, 1H), 7.44 - 7.48 (m, 2H), 7.40 - 7.44 (m, 2H), 7.00 (s, 1H), 6.86 (d, *J* = 15.81 Hz, 1H), 3.13 (q, *J* = 6.53 Hz, 2H), 1.46 - 1.53 (m, 1H), 0.88 (t, *J* = 7.34 Hz, 3H)

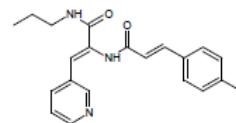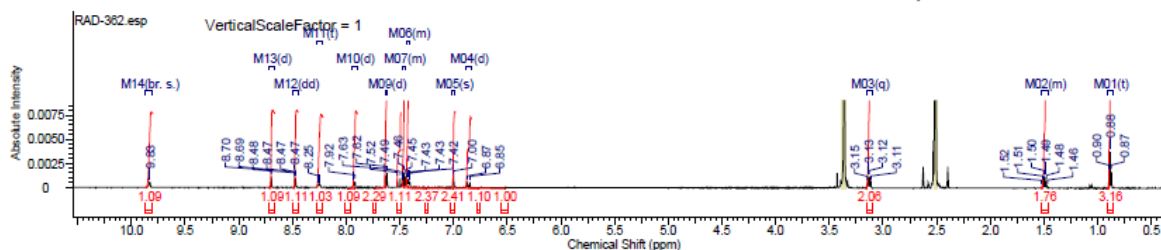

## Spectra of (4412)

# Supplementary Information

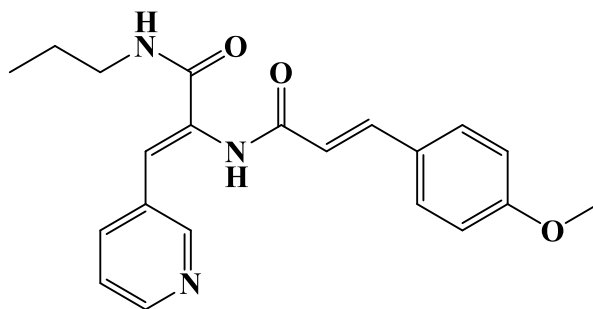

## LC/MS

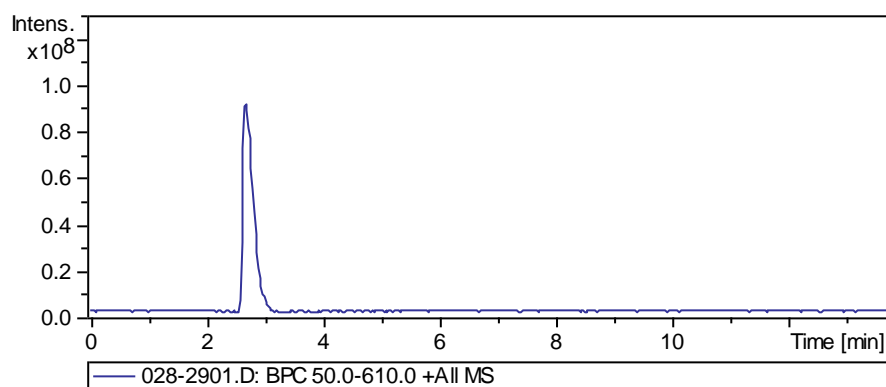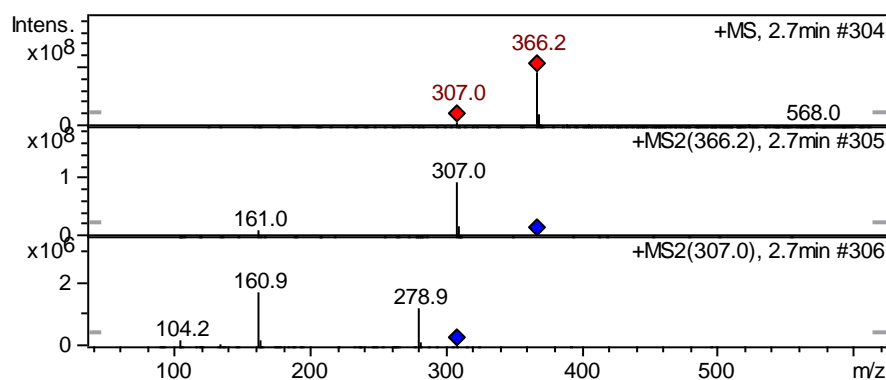

## FT-IR

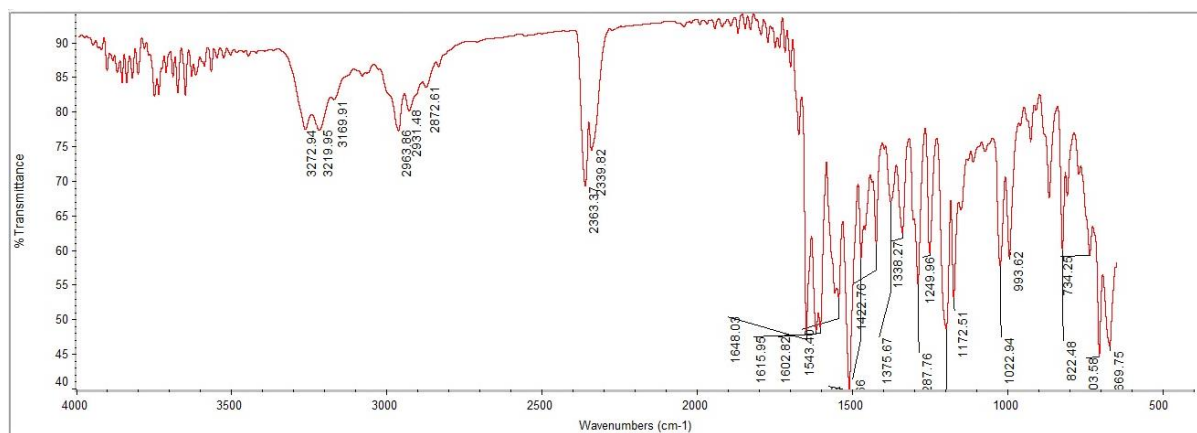

## <sup>1</sup>H NMR

## Supplementary Information

This report was created by ACD/NMR Processor Academic Edition. For more information go to [www.acdlabs.com/nmrproc/](http://www.acdlabs.com/nmrproc/)

### RAD-363

09/11/2016 8:34:26 AM  
Dr.Mustafa Sample : RAD-363 DMSO PROTON DMSO (D:Magdy) nmr 13

|                                                                       |                                                                                               |                        |                                                               |                       |           |
|-----------------------------------------------------------------------|-----------------------------------------------------------------------------------------------|------------------------|---------------------------------------------------------------|-----------------------|-----------|
| Formula C <sub>20</sub> H <sub>19</sub> N <sub>3</sub> O <sub>3</sub> | FW                                                                                            | 365.4256               |                                                               |                       |           |
| Acquisition Time (sec)                                                | 2.6564                                                                                        | Comment                | Dr.Mustafa Sample : RAD-363 DMSO PROTON DMSO (D:Magdy) nmr 13 |                       |           |
| Date                                                                  | 18 Jun 2015 14:41:36                                                                          | Date Stamp             | 18 Jun 2015 14:41:36                                          |                       |           |
| File Name                                                             | E:\Mostafa Alaraby Project\Oxazolone NMR\NMR final oxazolone\MUSTAFA RAD-363 18-06-2015\10fid |                        | Frequency (MHz)                                               | 600.15                |           |
| Nucleus                                                               | 1H                                                                                            | Number of Transients   | 32                                                            | Original Points Count | 32768     |
| Owner                                                                 | nmr                                                                                           | Points Count           | 32768                                                         | Pulse Sequence        | zg30      |
| SW (Hz)                                                               | 12335.53                                                                                      | Solvent                | DMSO-d6                                                       | Spectrum Offset (Hz)  | 3708.1750 |
| Sweep Width (Hz)                                                      | 12335.15                                                                                      | Temperature (degree C) | 25.000                                                        | Receiver Gain         | 144.00    |
|                                                                       |                                                                                               |                        |                                                               | Spectrum Type         | STANDARD  |

<sup>1</sup>H NMR (600 MHz, DMSO-d<sub>6</sub>) δ 9.72 (s, 1H), 8.69 (s, 1H), 8.47 (dd, *J* = 1.69, 4.71 Hz, 1H), 8.22 (t, *J* = 5.27 Hz, 1H), 7.91 (dd, *J* = 1.32, 8.09 Hz, 1H), 7.57 (d, *J* = 8.66 Hz, 2H), 7.46 (d, *J* = 15.43 Hz, 1H), 7.41 (dd, *J* = 4.71, 8.09 Hz, 1H), 7.02 (d, *J* = 8.66 Hz, 2H), 6.97 (s, 1H), 6.71 (d, *J* = 15.81 Hz, 1H), 3.81 (s, 3H), 3.10 - 3.16 (m, 2H), 1.49 (sxt, *J* = 7.23 Hz, 2H), 0.88 (t, *J* = 7.34 Hz, 3H)

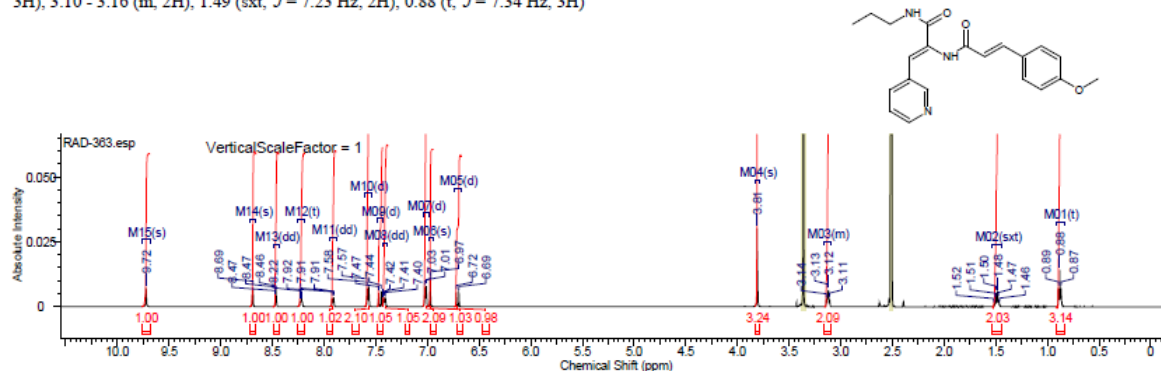

### <sup>13</sup>C NMR

This report was created by ACD/NMR Processor Academic Edition. For more information go to [www.acdlabs.com/nmrproc/](http://www.acdlabs.com/nmrproc/)

### RAD-363

20/09/2016 10:17:55 AM  
Dr. Mostafa Sample : RAD-363 DMSO

|                                                                       |                                                                                                                                        |                  |                                   |                        |         |                      |
|-----------------------------------------------------------------------|----------------------------------------------------------------------------------------------------------------------------------------|------------------|-----------------------------------|------------------------|---------|----------------------|
| Formula C <sub>20</sub> H <sub>19</sub> N <sub>3</sub> O <sub>3</sub> | FW                                                                                                                                     | 365.4256         |                                   |                        |         |                      |
| Acquisition Time (sec)                                                | 0.6423                                                                                                                                 | Comment          | Dr. Mostafa Sample : RAD-363 DMSO |                        | Date    | 19 Apr 2016 14:22:40 |
| Date Stamp                                                            | 19 Apr 2016 14:22:40                                                                                                                   |                  |                                   |                        |         |                      |
| File Name                                                             | E:\Projects\Mostafa Alaraby Project\Oxazolone\Oxazolone NMR\NMR final oxazolone\13 CNMR New 18-4-2016\MUSTAFA RAD-363 19-04-2016\10fid |                  |                                   |                        |         |                      |
| Frequency (MHz)                                                       | 213.77                                                                                                                                 | Nucleus          | 13C                               | Number of Transients   | 979     | Ortain spect         |
| Original Points Count                                                 | 32768                                                                                                                                  | Owner            | nmr                               | Points Count           | 32768   | app30                |
| Receiver Gain                                                         | 186.93                                                                                                                                 | SW (Hz)          | 51020.41                          | Solvent                | DMSO-d6 | Pulse Sequence       |
| Spectrum Type                                                         | STANDARD                                                                                                                               | Sweep Width (Hz) | 51018.85                          | Temperature (degree C) | 25.001  | Spectrum Offset (Hz) |
|                                                                       |                                                                                                                                        |                  |                                   |                        |         | 21292.2530           |

<sup>13</sup>C NMR (214 MHz, DMSO-d<sub>6</sub>) δ 164.8, 164.4, 160.7, 150.1, 148.9, 140.1, 135.9, 132.3, 130.6, 129.5, 127.3, 123.7, 123.0, 118.8, 114.6, 55.4, 41.0, 39.8, 39.7, 39.6, 39.4, 39.3, 39.2, 22.4, 11.5

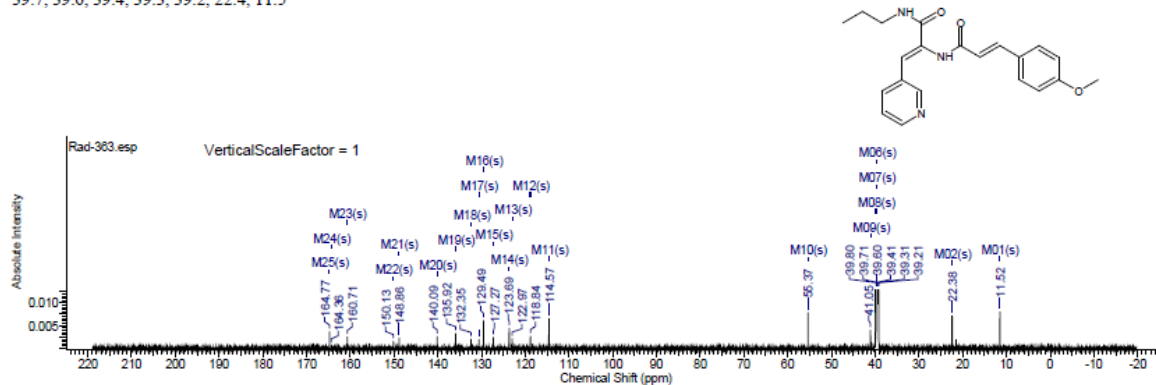

Spectra of (4512)

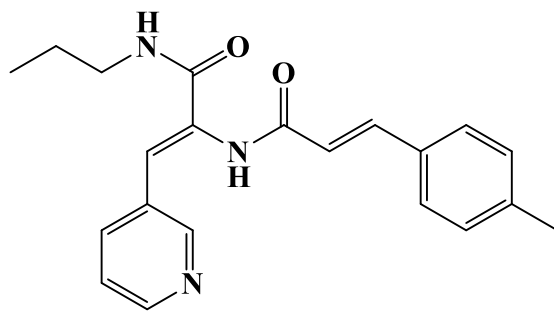

# LC/MS

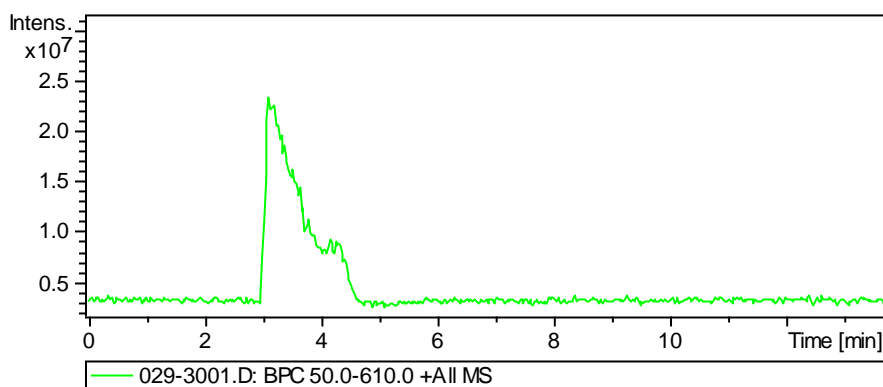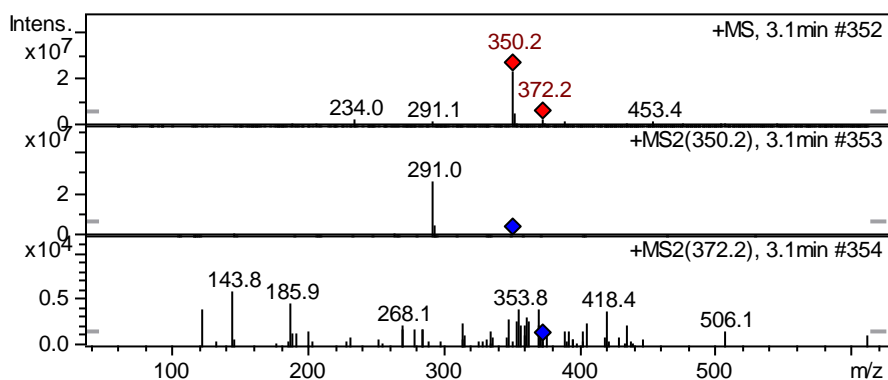

# <sup>1</sup>H NMR

## Supplementary Information

This report was created by ACD/NMR Processor Academic Edition. For more information go to [www.acdlabs.com/nmrproc/](http://www.acdlabs.com/nmrproc/)

### RAD-364

08/11/2016 8:37:59 AM  
Dr.Mustafa Sample : RAD-364 DMSO PROTON DMSO (D:Magdy) nmr 21

|                                                                       |                                                                                                |                                                               |
|-----------------------------------------------------------------------|------------------------------------------------------------------------------------------------|---------------------------------------------------------------|
| Formula C <sub>21</sub> H <sub>21</sub> N <sub>3</sub> O <sub>2</sub> | FW                                                                                             | 349.4262                                                      |
| Acquisition Time (sec)                                                | 2.6564                                                                                         | Comment                                                       |
| Date                                                                  | 18 Jun 2015 15:22:08                                                                           | Dr.Mustafa Sample : RAD-364 DMSO PROTON DMSO (D:Magdy) nmr 21 |
| File Name                                                             | E:\Mostafa Alaraby Project\Oxazolone NMR\NMR final oxazolone\MUSTAFA RAD-364 18-06-2015\10\fid | Date Stamp                                                    |
| Nucleus                                                               | 1H                                                                                             | Frequency (MHz)                                               |
| Owner                                                                 | nmr                                                                                            | Original Points Count                                         |
| SW(cyclical) (Hz)                                                     | 12335.53                                                                                       | Pulse Sequence                                                |
| Sweep Width (Hz)                                                      | 12335.15                                                                                       | Receiver Gain                                                 |
|                                                                       |                                                                                                | Spectrum Type                                                 |
|                                                                       |                                                                                                | Temperature (degree C)                                        |

<sup>1</sup>H NMR (600 MHz, DMSO-d<sub>6</sub>) δ 9.77 (s, 1H), 8.69 (d, *J* = 1.88 Hz, 1H), 8.47 (dd, *J* = 1.69, 4.71 Hz, 1H), 8.23 (t, *J* = 5.83 Hz, 1H), 7.92 (td, *J* = 1.60, 8.09 Hz, 1H), 7.49 - 7.54 (m, *J* = 7.81 Hz, 2H), 7.47 (d, *J* = 15.81 Hz, 1H), 7.41 (dd, *J* = 4.33, 8.09 Hz, 1H), 7.24 - 7.30 (m, *J* = 7.91 Hz, 2H), 6.98 (s, 1H), 6.80 (d, *J* = 15.81 Hz, 1H), 3.12 (q, *J* = 6.65 Hz, 2H), 2.35 (s, 3H), 1.49 (sxt, *J* = 7.30 Hz, 2H), 0.88 (t, *J* = 7.34 Hz, 3H)

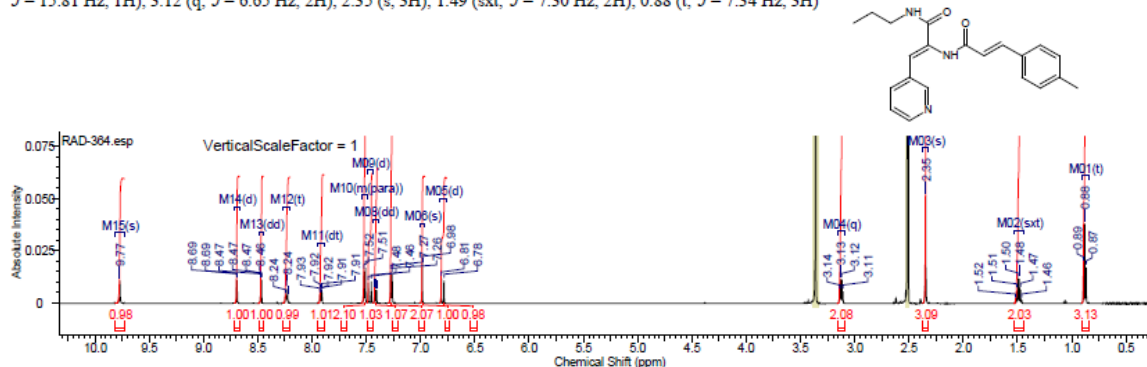

### <sup>13</sup>C NMR

This report was created by ACD/NMR Processor Academic Edition. For more information go to [www.acdlabs.com/nmrproc/](http://www.acdlabs.com/nmrproc/)

### RAD-364

20/09/2016 9:50:37 AM  
Dr.Mustafa Sample : RAD-364 DMSO

|                                                                       |                                                                                                                                          |                                  |
|-----------------------------------------------------------------------|------------------------------------------------------------------------------------------------------------------------------------------|----------------------------------|
| Formula C <sub>21</sub> H <sub>21</sub> N <sub>3</sub> O <sub>2</sub> | FW                                                                                                                                       | 349.4262                         |
| Acquisition Time (sec)                                                | 0.8423                                                                                                                                   | Comment                          |
| Date Stamp                                                            | 20 Apr 2016 13:08:00                                                                                                                     | Dr.Mustafa Sample : RAD-364 DMSO |
| File Name                                                             | E:\Projects\Mostafa Alaraby Project\Oxazolone\Oxazolone NMR\NMR final oxazolone\13 CNMR New 18-4-2016\MUSTAFA RAD-364 18-04-2016\110\fid | Date                             |
| Frequency (MHz)                                                       | 213.77                                                                                                                                   | Nucleus                          |
| Original Points Count                                                 | 32768                                                                                                                                    | Owner                            |
| Receiver Gain                                                         | 186.93                                                                                                                                   | SW(cyclical) (Hz)                |
| Spectrum Type                                                         | STANDARD                                                                                                                                 | Sweep Width (Hz)                 |
|                                                                       |                                                                                                                                          | Temperature (degree C)           |

<sup>13</sup>C NMR (214 MHz, DMSO-d<sub>6</sub>) δ 164.7, 164.6, 150.1, 148.9, 140.3, 139.8, 135.9, 132.3, 132.0, 130.6, 129.7, 127.8, 123.7, 123.1, 120.4, 41.1, 39.8, 39.7, 39.6, 39.4, 39.3, 39.2, 22.4, 21.1, 11.5

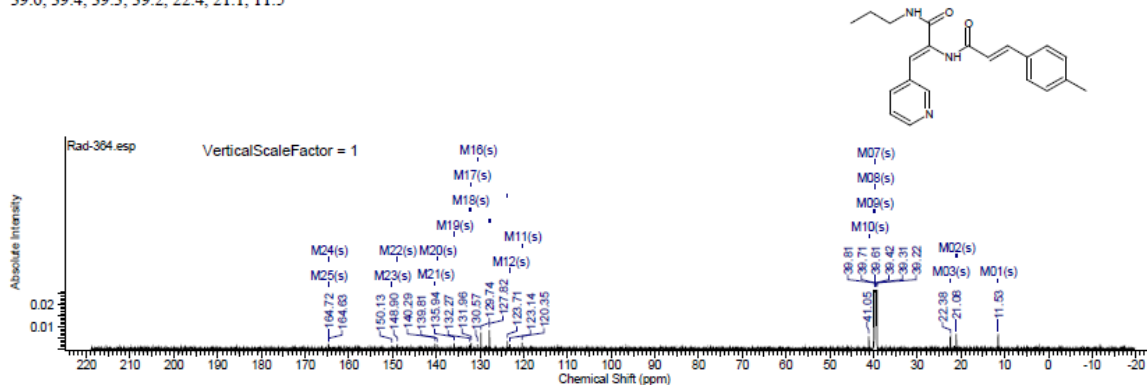

## Spectra of (4612)



# Supplementary Information

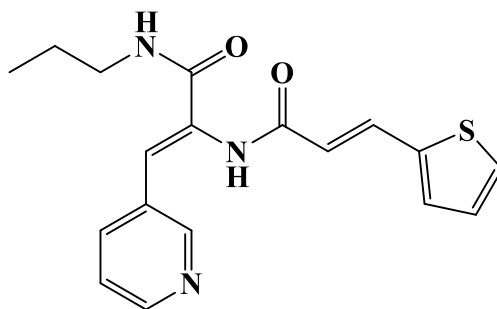

## LC/MS

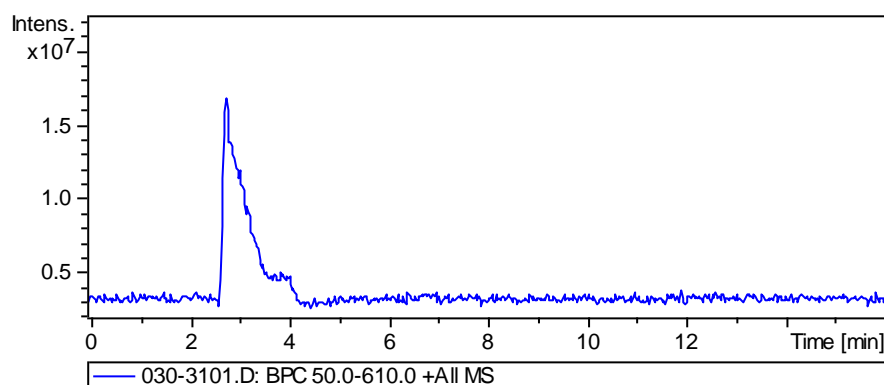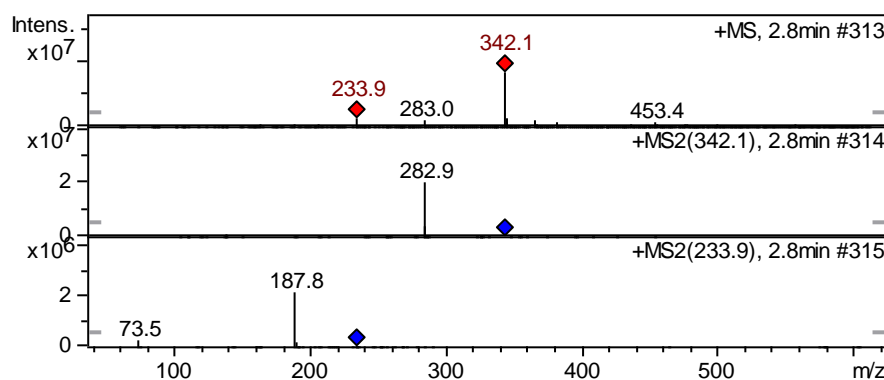

## FT-IR

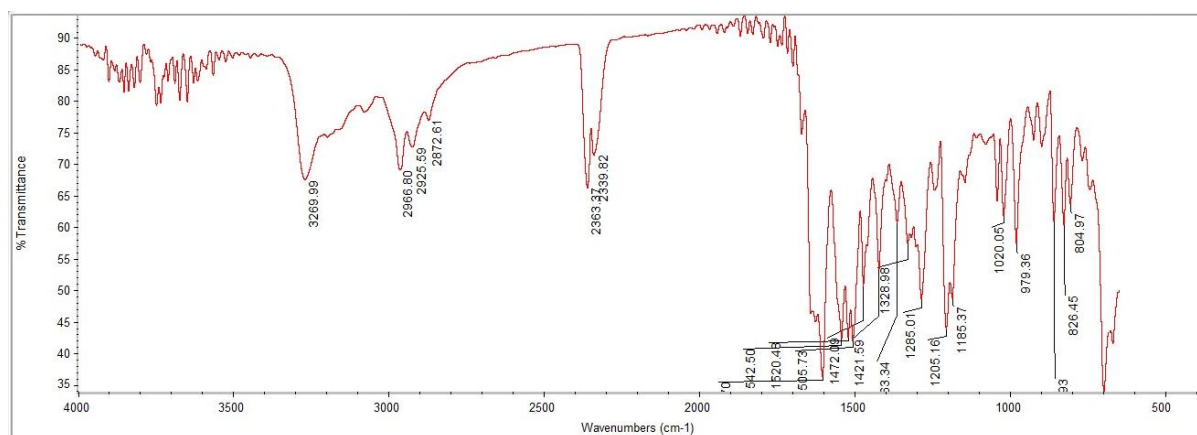

## <sup>1</sup>H NMR

# Supplementary Information

This report was created by ACD/NMR Processor Academic Edition. For more information go to [www.acdlabs.com/nmrproc/](http://www.acdlabs.com/nmrproc/)

## RAD-365

09/11/2016 8:39:53 AM  
Dr. Mustafa Sample : RAD-365 DMSO PROTON DMSO (D:Magdy) nmr 22

|                                                                         |                                                                                               |                        |                                                                |
|-------------------------------------------------------------------------|-----------------------------------------------------------------------------------------------|------------------------|----------------------------------------------------------------|
| Formula C <sub>14</sub> H <sub>12</sub> N <sub>2</sub> O <sub>2</sub> S |                                                                                               | FW 341.4274            |                                                                |
| Acquisition Time (sec)                                                  | 2.6564                                                                                        | Comment                | Dr. Mustafa Sample : RAD-365 DMSO PROTON DMSO (D:Magdy) nmr 22 |
| Date                                                                    | 18 Jun 2015 15:28:32                                                                          | Date Stamp             | 18 Jun 2015 15:28:32                                           |
| File Name                                                               | E:\Mostafa Alaraby Project\Oxazolone NMR\NMR final oxazolone\MUSTAFA_RAD-365_18-06-2015\10fid |                        | Frequency (MHz)                                                |
| Nucleus                                                                 | 1H                                                                                            | Number of Transients   | 32                                                             |
| Owner                                                                   | nmr                                                                                           | Points Count           | 32768                                                          |
| SW (cyclical) (Hz)                                                      | 12335.63                                                                                      | Solvent                | DMSO-d6                                                        |
| Sweep Width (Hz)                                                        | 12335.15                                                                                      | Temperature (degree C) | 25.000                                                         |
|                                                                         |                                                                                               | Pulse Sequence         | zgpg30                                                         |
|                                                                         |                                                                                               | Spectrum Offset (Hz)   | 3708.1750                                                      |
|                                                                         |                                                                                               | Receiver Gain          | 144.00                                                         |
|                                                                         |                                                                                               | Spectrum Type          | STANDARD                                                       |

<sup>1</sup>H NMR (600 MHz, DMSO-d<sub>6</sub>) δ 9.78 (br. s., 1H), 8.68 (d, *J* = 1.88 Hz, 1H), 8.47 (dd, *J* = 1.51, 4.89 Hz, 1H), 8.23 (t, *J* = 5.84 Hz, 1H), 7.91 (td, *J* = 1.79, 8.09 Hz, 1H), 7.62 - 7.70 (m, 2H), 7.39 - 7.47 (m, 2H), 7.15 (dd, *J* = 3.58, 5.08 Hz, 1H), 6.99 (s, 1H), 6.60 (d, *J* = 15.81 Hz, 1H), 3.12 (q, *J* = 6.65 Hz, 2H), 1.49 (sxt, *J* = 7.23 Hz, 2H), 0.88 (t, *J* = 7.53 Hz, 3H)

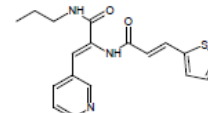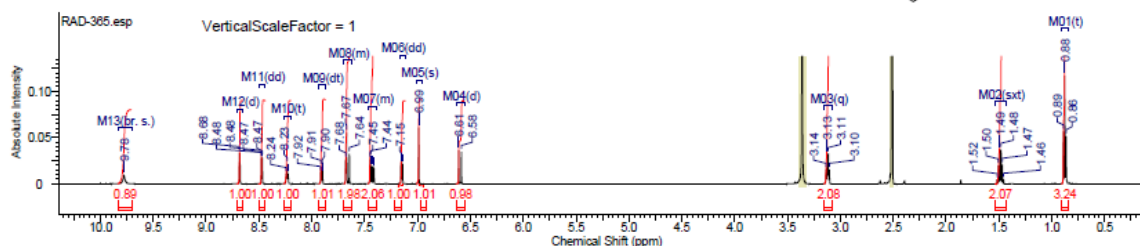

## <sup>13</sup>C NMR

This report was created by ACD/NMR Processor Academic Edition. For more information go to [www.acdlabs.com/nmrproc/](http://www.acdlabs.com/nmrproc/)

## RAD-365

20/09/2016 9:54:23 AM  
Dr. Mustafa Sample : RAD-365 DMSO

|                                                                         |                                                                                                                                         |                    |                                  |                        |         |                      |            |
|-------------------------------------------------------------------------|-----------------------------------------------------------------------------------------------------------------------------------------|--------------------|----------------------------------|------------------------|---------|----------------------|------------|
| Formula C <sub>14</sub> H <sub>12</sub> N <sub>2</sub> O <sub>2</sub> S |                                                                                                                                         | FW                 | 341.4274                         |                        |         |                      |            |
| Acquisition Time (sec)                                                  | 0.6423                                                                                                                                  | Comment            | Dr Mostafa Sample : RAD-365 DMSO |                        |         |                      |            |
| Date Stamp                                                              | 20 Apr 2016 17:24:00                                                                                                                    |                    | Date                             | 20 Apr 2016 17:24:00   |         |                      |            |
| File Name                                                               | E:\Projects\Mostafa Alaraby Project\Oxazolone\Oxazolone NMR\NMR final oxazolone\13 CNMR New 18-4-2016\MUSTAFA_RAD-365_19-04-2016\130fid |                    |                                  |                        |         |                      |            |
| Frequency (MHz)                                                         | 213.77                                                                                                                                  | Nucleus            | <sup>13</sup> C                  | Number of Transients   | 3500    | Origin               | spect      |
| Original Points Count                                                   | 32768                                                                                                                                   | Owner              | nmr                              | Points Count           | 32768   | Pulse Sequence       | zgpg30     |
| Receiver Gain                                                           | 186.93                                                                                                                                  | SW (cyclical) (Hz) | 51020.41                         | Solvent                | DMSO-d6 | Spectrum Offset (Hz) | 21284.4688 |
| Spectrum Type                                                           | STANDARD                                                                                                                                | Sweep Width (Hz)   | 51018.85                         | Temperature (degree C) | 25.000  |                      |            |

<sup>13</sup>C NMR (214 MHz, DMSO-d<sub>6</sub>) δ 164.6, 164.2, 150.1, 148.9, 139.7, 135.9, 133.3, 132.1, 131.5, 131.5, 130.5, 128.6, 123.7, 123.2, 120.1, 41.0, 39.8, 39.7, 39.6, 39.4, 39.3, 39.2, 22.3, 11.5

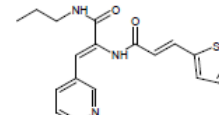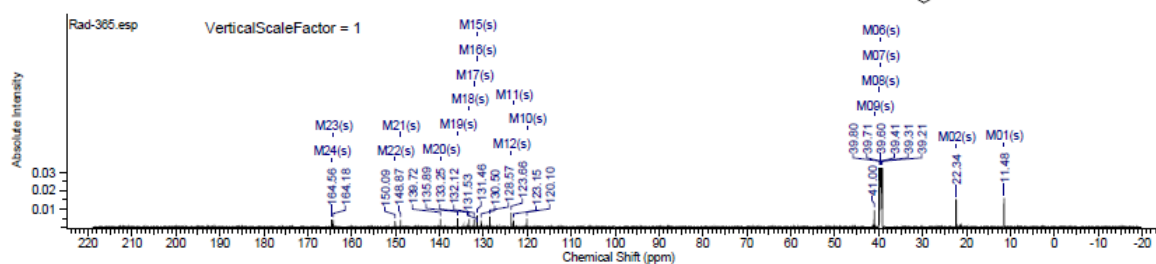

## Spectra of (4712)

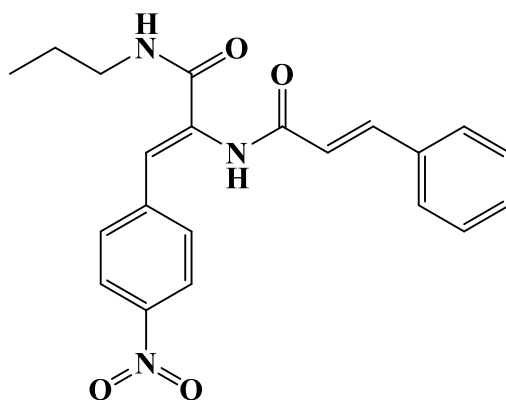

## LC/MS

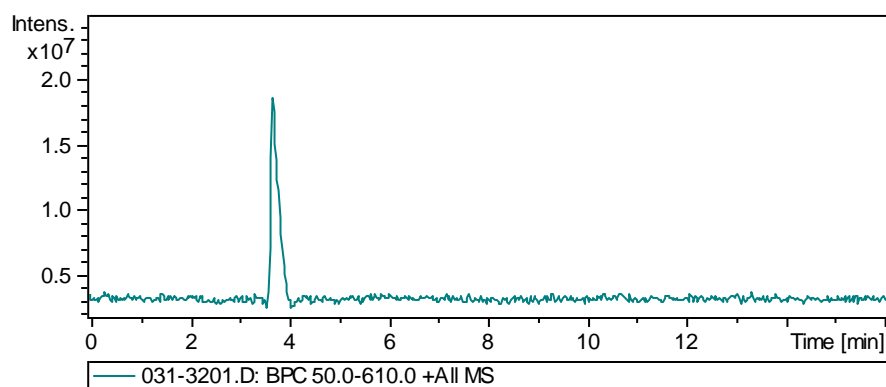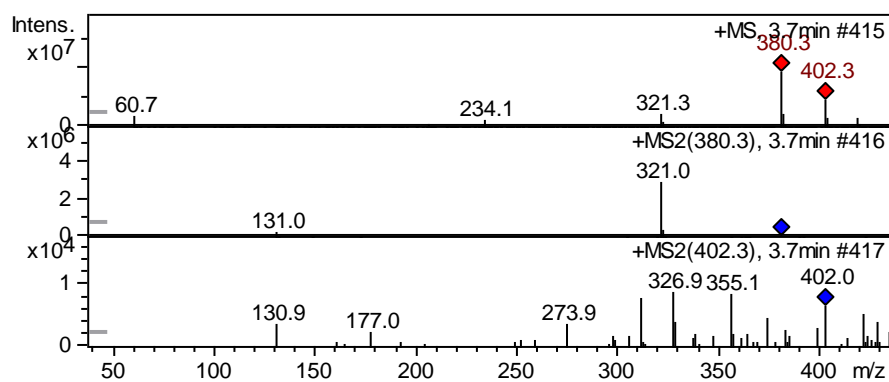

## FT-IR

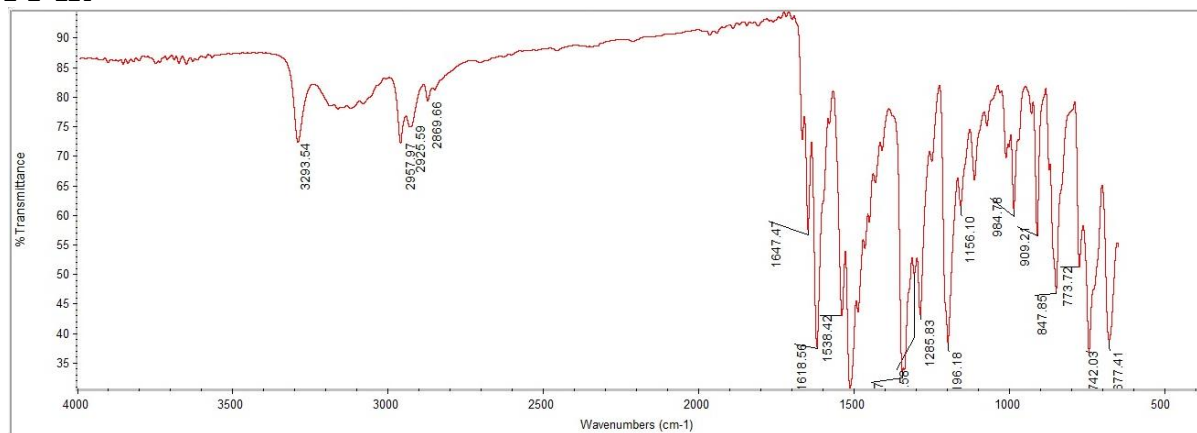

# Supplementary Information

## <sup>1</sup>H NMR

This report was created by ACD/NMR Processor Academic Edition. For more information go to [www.acdlabs.com/nmrproc/](http://www.acdlabs.com/nmrproc/)

### RAD-371

11/10/2016 9:01:33 AM  
Dr.Mustafa Sample : RAD-371 DMSO PROTON DMSO (D:Magdy) nmr 17

|                                                                       |                                                                                                |                        |                                                               |
|-----------------------------------------------------------------------|------------------------------------------------------------------------------------------------|------------------------|---------------------------------------------------------------|
| Formula C <sub>21</sub> H <sub>21</sub> N <sub>3</sub> O <sub>3</sub> | FW                                                                                             | 379.4091               |                                                               |
| Acquisition Time (sec)                                                | 2.6564                                                                                         | Comment                | Dr.Mustafa Sample : RAD-371 DMSO PROTON DMSO (D:Magdy) nmr 17 |
| Date                                                                  | 18 Jun 2015 15:00:48                                                                           | Date Stamp             | 18 Jun 2015 15:00:48                                          |
| File Name                                                             | E:\Mostafa Alaraby Project\Oxazolone NMR\NMR final oxazolone\MUSTAFA RAD-371 18-06-2015\10\fid |                        |                                                               |
| Nucleus                                                               | <sup>1</sup> H                                                                                 | Number of Transients   | 32                                                            |
| Owner                                                                 | nmr                                                                                            | Points Count           | 32768                                                         |
| SW (cyclical) (Hz)                                                    | 12335.53                                                                                       | Solvent                | DMSO-d6                                                       |
| Sweep Width (Hz)                                                      | 12335.15                                                                                       | Temperature (degree C) | 25.000                                                        |
|                                                                       |                                                                                                | Pulse Sequence         | zg30                                                          |
|                                                                       |                                                                                                | Spectrum Offset (Hz)   | 3706.1750                                                     |
|                                                                       |                                                                                                | Receiver Gain          | 144.00                                                        |
|                                                                       |                                                                                                | Spectrum Type          | STANDARD                                                      |

<sup>1</sup>H NMR (600 MHz, DMSO-d<sub>6</sub>) δ 9.94 (br. s., 1H), 8.34 (t, J = 5.84 Hz, 1H), 8.21 - 8.26 (m, J = 8.66 Hz, 2H), 7.74 - 7.79 (m, J = 9.03 Hz, 2H), 7.62 (d, J = 7.15 Hz, 2H), 7.51 (d, J = 15.81 Hz, 1H), 7.43 - 7.48 (m, 3H), 6.96 (s, 1H), 6.86 (d, J = 16.19 Hz, 1H), 3.10 - 3.17 (m, 2H), 1.50 (sxt, J = 7.30 Hz, 2H), 0.89 (t, J = 7.53 Hz, 3H)

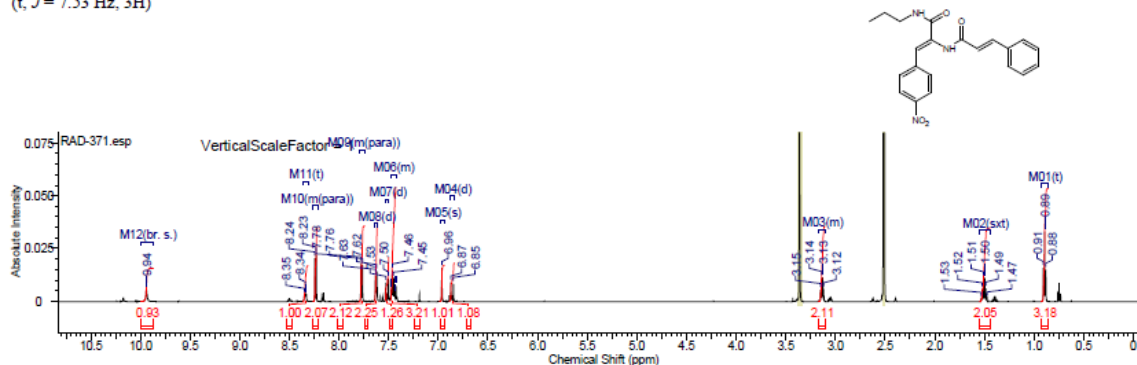

## <sup>13</sup>C NMR

This report was created by ACD/NMR Processor Academic Edition. For more information go to [www.acdlabs.com/nmrproc/](http://www.acdlabs.com/nmrproc/)

### RAD-371

20/09/2016 9:58:58 AM  
Dr.Mustafa Sample : RAD-371 DMSO

|                                                                       |                                                                                                                                          |                    |                                  |                                 |
|-----------------------------------------------------------------------|------------------------------------------------------------------------------------------------------------------------------------------|--------------------|----------------------------------|---------------------------------|
| Formula C <sub>21</sub> H <sub>21</sub> N <sub>3</sub> O <sub>3</sub> |                                                                                                                                          | FW                 | 379.4091                         |                                 |
| Acquisition Time (sec)                                                | 0.8423                                                                                                                                   | Comment            | Dr.Mustafa Sample : RAD-371 DMSO |                                 |
| Date Stamp                                                            | 21 Apr 2016 01:30:24                                                                                                                     |                    | Date                             | 21 Apr 2016 01:30:24            |
| File Name                                                             | E:\Projects\Mostafa Alaraby Project\Oxazolone\Oxazolone NMR\NMR final oxazolone\13 CNMR New 18-4-2016\MUSTAFA RAD-371 19-04-2016\160\fid |                    |                                  |                                 |
| Frequency (MHz)                                                       | 213.77                                                                                                                                   | Nucleus            | <sup>13</sup> C                  | Number of Transients 3500       |
| Original Points Count                                                 | 32768                                                                                                                                    | Owner              | nmr                              | Points Count 32768              |
| Receiver Gain                                                         | 186.93                                                                                                                                   | SW (cyclical) (Hz) | 51020.41                         | Solvent DMSO-d6                 |
| Spectrum Type                                                         | STANDARD                                                                                                                                 | Sweep Width (Hz)   | 51018.95                         | Temperature (degree C) 24.998   |
|                                                                       |                                                                                                                                          |                    |                                  | Pulse Sequence zgpg30           |
|                                                                       |                                                                                                                                          |                    |                                  | Spectrum Offset (Hz) 21290.6973 |

<sup>13</sup>C NMR (214 MHz, DMSO-d<sub>6</sub>) δ 164.7, 164.3, 146.4, 141.7, 140.5, 134.7, 133.8, 130.2, 130.0, 129.1, 127.8, 123.7, 123.0, 121.3, 41.1, 39.8, 39.7, 39.6, 39.4, 39.3, 39.2, 22.3, 11.5

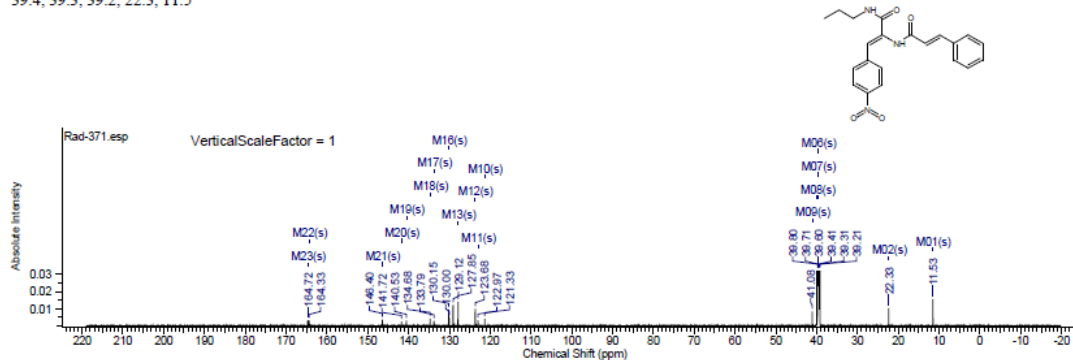

## Spectra of (4812)

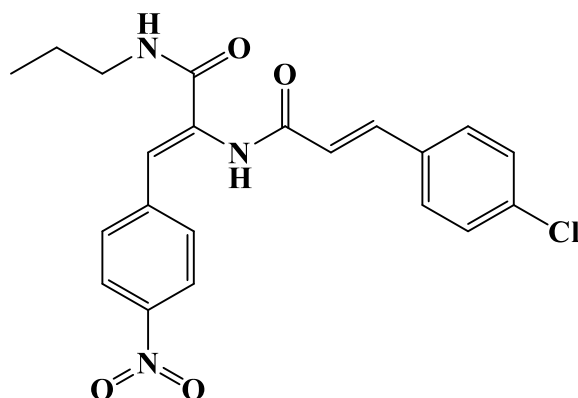

## LC/MS

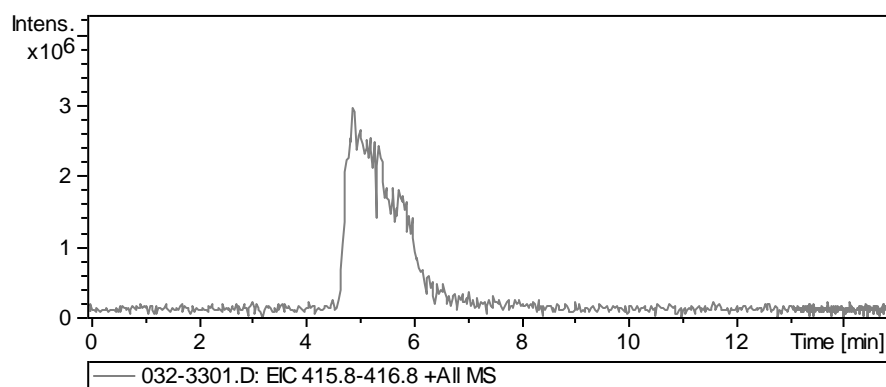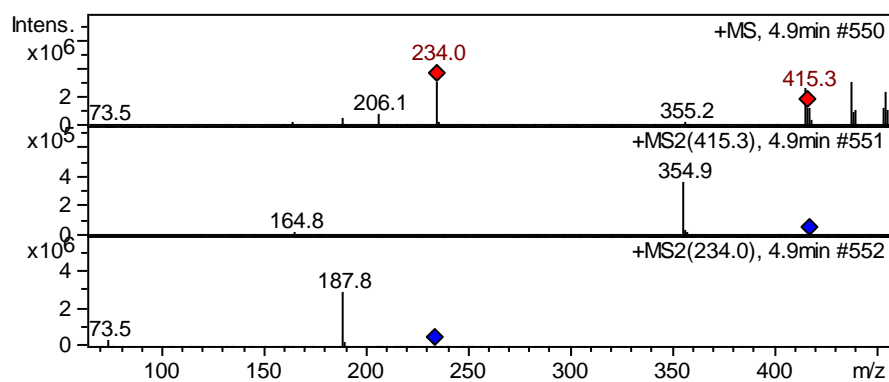

## FT-IR

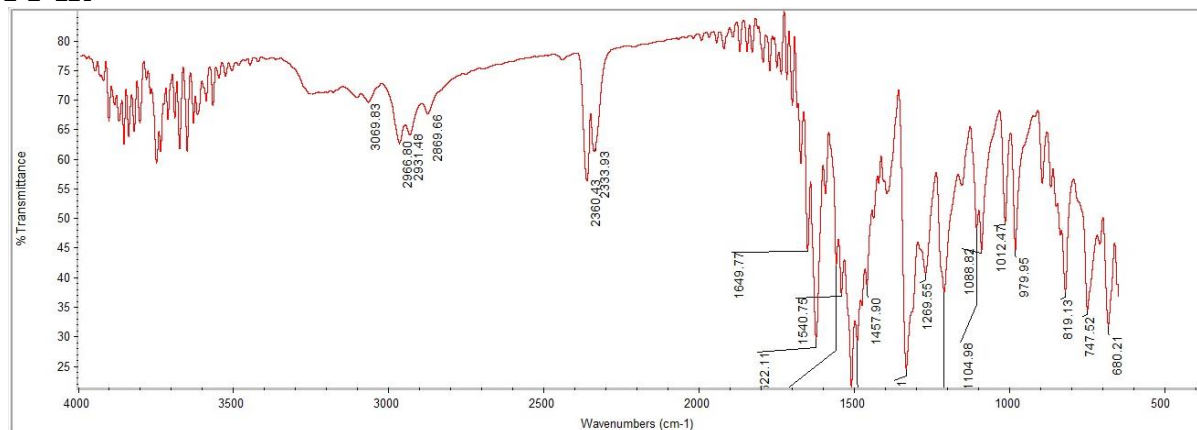

# Supplementary Information

## <sup>1</sup>H NMR

This report was created by ACD/NMR Processor Academic Edition. For more information go to [www.acdlabs.com/nmrproc/](http://www.acdlabs.com/nmrproc/)

### RAD-372

11/10/2016 8:08:12 AM  
Dr.Mustafa Sample : RAD-372 DMSO PROTON DMSO (D<sub>2</sub>O) nmr 20

|                                                                                                         |                                                                                |
|---------------------------------------------------------------------------------------------------------|--------------------------------------------------------------------------------|
| Formula C <sub>18</sub> H <sub>18</sub> ClN <sub>2</sub> O <sub>2</sub>                                 | FW 413.8542                                                                    |
| Acquisition Time (sec) 2.6564                                                                           | Comment Dr.Mustafa Sample : RAD-372 DMSO PROTON DMSO (D <sub>2</sub> O) nmr 20 |
| Date 18 Jun 2015 15:17:52                                                                               | Date Stamp 18 Jun 2015 15:17:52                                                |
| File Name E:\Mostafa Alaraby Project\Oxazolone NMR\NMR final oxazolone\MUSTAFA RAD-372 18-06-2015\10fid | Frequency (MHz) 600.15                                                         |
| Nucleus 1H                                                                                              | Number of Transients 32                                                        |
| Owner nmr                                                                                               | Points Count 32768                                                             |
| SW (Hz) 12335.53                                                                                        | Pulse Sequence zgpg30                                                          |
| Solvent DMSO-d6                                                                                         | Receiver Gain 161.00                                                           |
| Spectrum Offset (Hz) 3706.1750                                                                          | Spectrum Type STANDARD                                                         |
| Sweep Width (Hz) 12335.15                                                                               | Temperature (degree C) 25.000                                                  |

<sup>1</sup>H NMR (600 MHz, DMSO-d<sub>6</sub>) δ 9.95 (s, 1H), 8.34 (t, J = 5.46 Hz, 1H), 8.21 - 8.25 (m, J = 9.04 Hz, 2H), 7.75 - 7.79 (m, J = 9.04 Hz, 2H), 7.65 (d, J = 8.66 Hz, 2H), 7.50 - 7.55 (m, 3H), 6.97 (s, 1H), 6.86 (d, J = 15.81 Hz, 1H), 3.13 (q, J = 6.53 Hz, 2H), 1.50 (sxt, J = 7.23 Hz, 2H), 0.89 (t, J = 7.53 Hz, 3H)

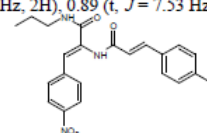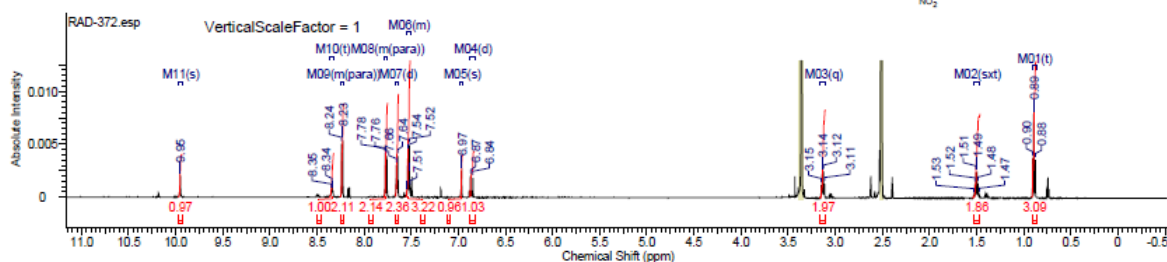

## <sup>13</sup>C NMR

This report was created by ACD/NMR Processor Academic Edition. For more information go to [www.acdlabs.com/nmrproc/](http://www.acdlabs.com/nmrproc/)

### RAD-372

20/09/2016 10:02:48 AM  
Dr.Mustafa Sample : RAD-372 DMSO

|                                                                                                                                                  |                                          |
|--------------------------------------------------------------------------------------------------------------------------------------------------|------------------------------------------|
| Formula C <sub>18</sub> H <sub>18</sub> ClN <sub>2</sub> O <sub>2</sub>                                                                          | FW 413.8542                              |
| Acquisition Time (sec) 0.6423                                                                                                                    | Comment Dr.Mustafa Sample : RAD-372 DMSO |
| Date Stamp 19 Apr 2016 08:17:52                                                                                                                  | Date 19 Apr 2016 08:17:52                |
| File Name E:\Projects\Mostafa Alaraby Project\Oxazolone\Oxazolone NMR\NMR final oxazolone\13 CNMR New 18-4-2016\MUSTAFA RAD-372 18-04-2016\00fid | Frequency (MHz) 125.77                   |
| Nucleus 13C                                                                                                                                      | Number of Transients 3072                |
| Original Points Count 32768                                                                                                                      | Points Count 32768                       |
| Owner nmr                                                                                                                                        | Pulse Sequence zgpg30                    |
| Receiver Gain 186.93                                                                                                                             | Solvent DMSO-d6                          |
| SW (Hz) 51020.41                                                                                                                                 | Spectrum Offset (Hz) 21290.6973          |
| Spectrum Type STANDARD                                                                                                                           | Sweep Width (Hz) 51018.85                |
|                                                                                                                                                  | Temperature (degree C) 24.999            |

<sup>13</sup>C NMR (125 MHz, DMSO-d<sub>6</sub>) δ 164.7, 164.1, 146.4, 141.7, 139.1, 134.4, 133.7, 133.7, 130.2, 129.5, 129.2, 123.7, 123.1, 122.1, 41.1, 39.8, 39.7, 39.6, 39.4, 39.3, 39.2, 22.3, 11.5

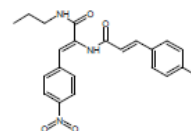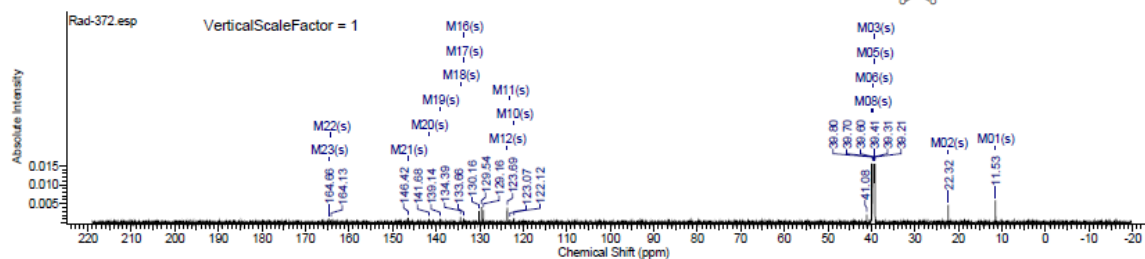

Spectra of (4912)

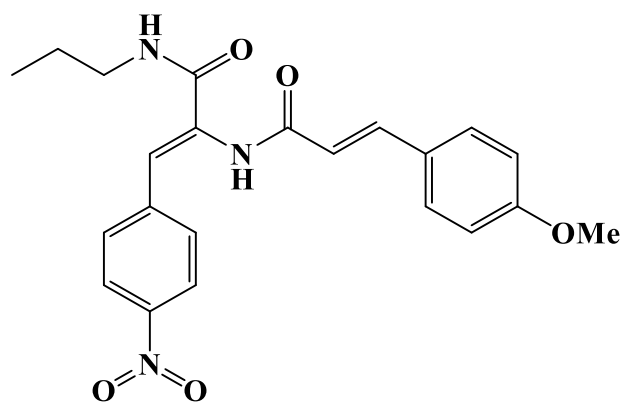

# FT-IR

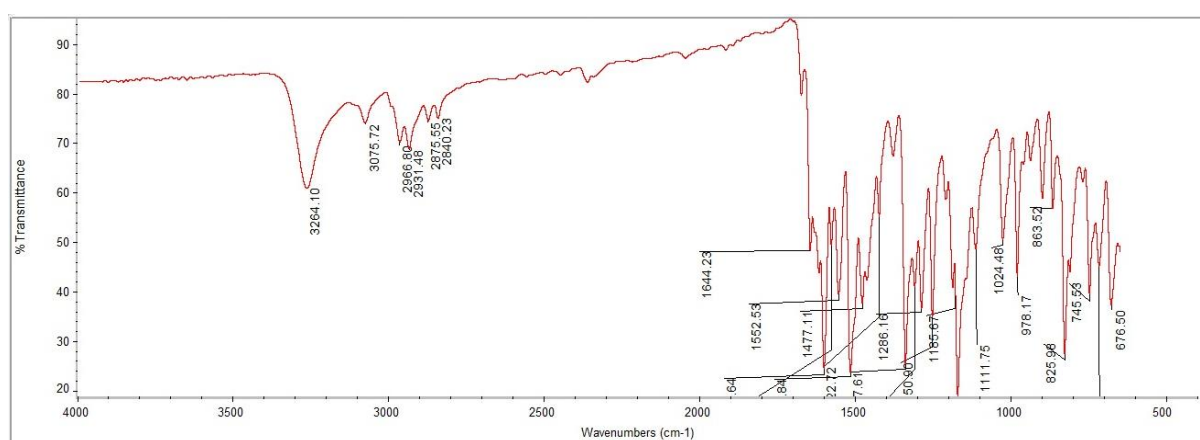

# <sup>1</sup>H NMR

# Supplementary Information

This report was created by ACD/NMR Processor Academic Edition. For more information go to [www.acdlabs.com/nmrproc/](http://www.acdlabs.com/nmrproc/)

## RAD-373

09/11/2016 9:23:51 AM  
Dr.Mustafa Sample : RAD-373 DMSO PROTON DMSO (D:Magdy) nmr 25

|                        |                                                                                                |                        |                                                               |
|------------------------|------------------------------------------------------------------------------------------------|------------------------|---------------------------------------------------------------|
| Formula                | C <sub>20</sub> H <sub>18</sub> N <sub>2</sub> O <sub>4</sub>                                  | FW                     | 409.4351                                                      |
| Acquisition Time (sec) | 2.0564                                                                                         | Comment                | Dr.Mustafa Sample : RAD-373 DMSO PROTON DMSO (D:Magdy) nmr 25 |
| Date                   | 18 Jun 2015 15:43:28                                                                           | Date Stamp             | 18 Jun 2015 15:43:28                                          |
| File Name              | E:\Mostafa Alaraby Project\Oxazolone NMR\NMR final oxazolone\MUSTAFA RAD-373 18-06-2015\10.fid | Frequency (MHz)        | 600.15                                                        |
| Nucleus                | <sup>1</sup> H                                                                                 | Number of Transients   | 32                                                            |
| Owner                  | nmr                                                                                            | Points Count           | 32788                                                         |
| SW (cyclical) (Hz)     | 12335.53                                                                                       | Pulse Sequence         | zg30                                                          |
| Sweep Width (Hz)       | 12335.15                                                                                       | Solvent                | DMSO-d <sub>6</sub>                                           |
|                        |                                                                                                | Spectrum Offset (Hz)   | 3706.1750                                                     |
|                        |                                                                                                | Spectrum Type          | STANDARD                                                      |
|                        |                                                                                                | Temperature (degree C) | 25.000                                                        |

<sup>1</sup>H NMR (600 MHz, DMSO-d<sub>6</sub>) δ 9.84 (br. s., 1H), 8.31 (t, *J* = 5.65 Hz, 1H), 8.20 - 8.26 (m, *J* = 9.04 Hz, 2H), 7.73 - 7.79 (m, *J* = 8.66 Hz, 2H), 7.56 - 7.58 (m, *J* = 8.66 Hz, 2H), 7.46 (d, *J* = 15.81 Hz, 1H), 7.01 - 7.03 (m, *J* = 8.66 Hz, 2H), 6.93 (s, 1H), 6.71 (d, *J* = 15.81 Hz, 1H), 3.81 (s, 3H), 3.10 - 3.16 (m, 2H), 1.50 (sxt, *J* = 7.23 Hz, 2H), 0.89 (t, *J* = 7.53 Hz, 3H)

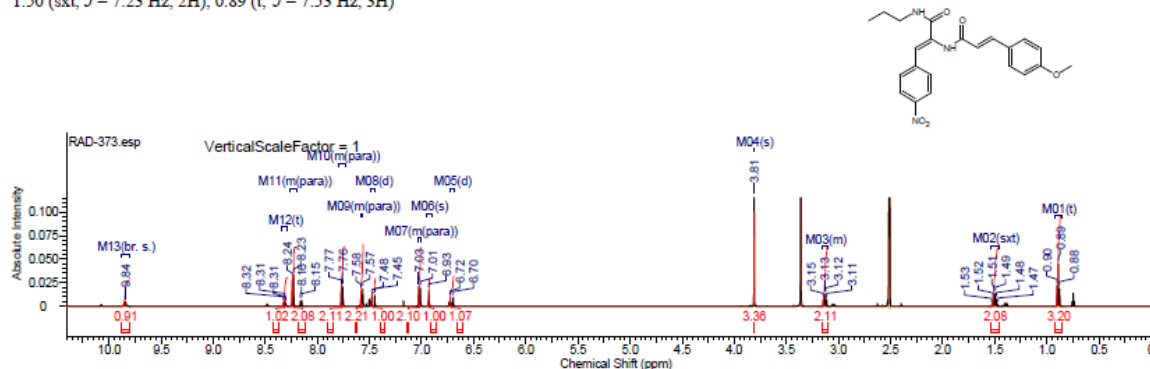

## <sup>13</sup>C NMR

This report was created by ACD/NMR Processor Academic Edition. For more information go to [www.acdlabs.com/nmrproc/](http://www.acdlabs.com/nmrproc/)

## RAD-373

20/09/2016 10:08:57 AM  
Dr.Mustafa Sample : RAD-373 DMSO

|                        |                                                                                                                               |                        |                                  |
|------------------------|-------------------------------------------------------------------------------------------------------------------------------|------------------------|----------------------------------|
| Formula                | C <sub>20</sub> H <sub>18</sub> N <sub>2</sub> O <sub>4</sub>                                                                 | FW                     | 409.4351                         |
| Acquisition Time (sec) | 0.8423                                                                                                                        | Comment                | Dr.Mustafa Sample : RAD-373 DMSO |
| Date Stamp             | 19 Apr 2016 01:11:12                                                                                                          | Date                   | 19 Apr 2016 01:11:12             |
| File Name              | E:\Projects\Mostafa Alaraby Project\Oxazolone NMR\NMR final oxazolone\13 CNMR New 18-4-2016\MUSTAFA RAD-373 18-04-2016\60.fid | Frequency (MHz)        | 213.77                           |
| Nucleus                | <sup>13</sup> C                                                                                                               | Number of Transients   | 3072                             |
| Owner                  | nmr                                                                                                                           | Points Count           | 32788                            |
| SW (cyclical) (Hz)     | 51020.41                                                                                                                      | Pulse Sequence         | zgpg30                           |
| Spectrum Type          | STANDARD                                                                                                                      | Solvent                | DMSO-d <sub>6</sub>              |
|                        |                                                                                                                               | Spectrum Offset (Hz)   | 21287.5840                       |
|                        |                                                                                                                               | Temperature (degree C) | 24.899                           |

<sup>13</sup>C NMR (214 MHz, DMSO-d<sub>6</sub>) δ 164.8, 164.6, 160.7, 146.3, 141.8, 140.3, 134.0, 130.1, 129.5, 127.2, 123.7, 122.6, 118.7, 114.5, 55.4, 41.1, 39.8, 39.7, 39.6, 39.4, 39.3, 39.2, 22.3, 11.5

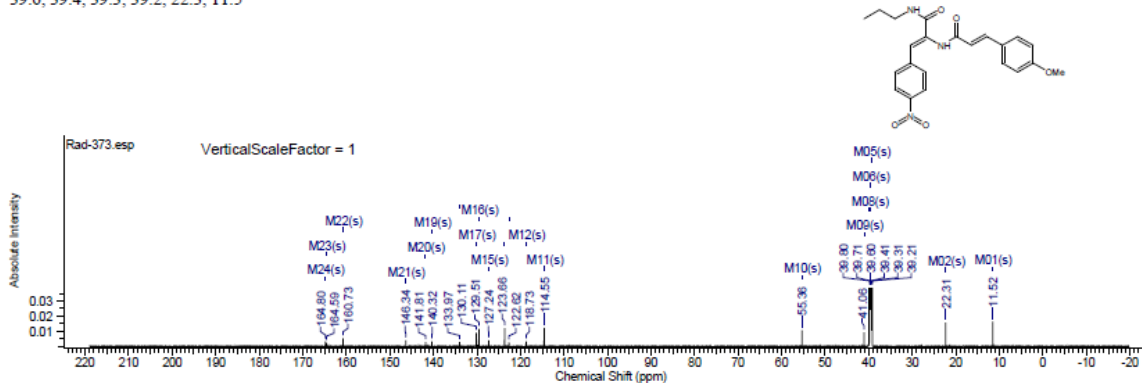



## Spectra of (5012)

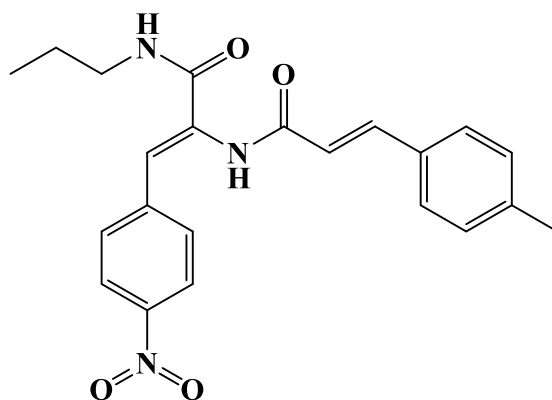

### LC/MS

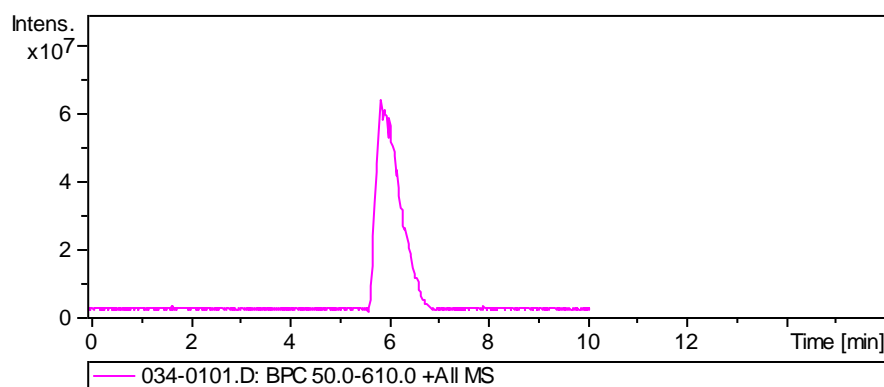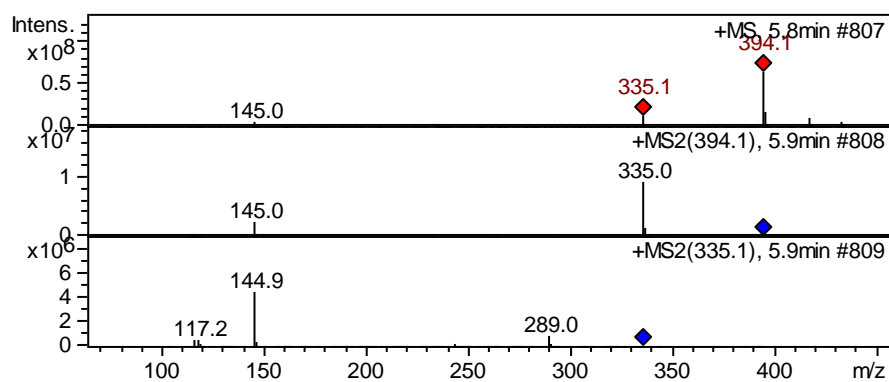

### FT-IR

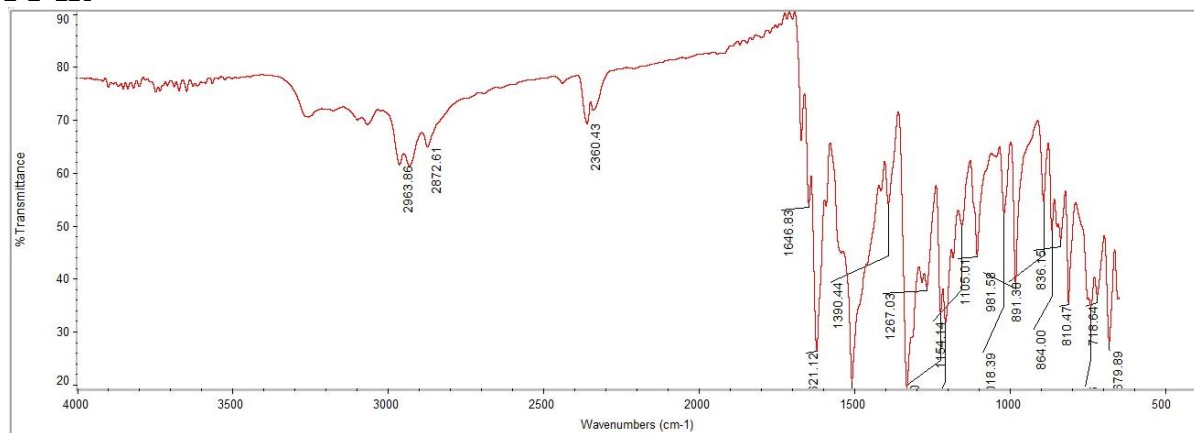

# Supplementary Information

## <sup>1</sup>H NMR

This report was created by ACD/NMR Processor Academic Edition. For more information go to [www.acdlabs.com/nmrproc/](http://www.acdlabs.com/nmrproc/)

### RAD-374

09/11/2016 9:48:47 AM  
Dr.Mustafa El-Araby Sample : RAD-314 DMSO

|                                                                       |                                                                                               |                        |                                            |                      |                      |                       |          |
|-----------------------------------------------------------------------|-----------------------------------------------------------------------------------------------|------------------------|--------------------------------------------|----------------------|----------------------|-----------------------|----------|
| Formula C <sub>21</sub> H <sub>21</sub> N <sub>3</sub> O <sub>3</sub> | FW                                                                                            | 348.4382               |                                            |                      |                      |                       |          |
| Acquisition Time (sec)                                                | 1.9268                                                                                        | Comment                | Dr. Mustafa El-Araby Sample : RAD-314 DMSO | Date                 | 08 Apr 2015 10:23:44 |                       |          |
| Date Stamp                                                            | 08 Apr 2015 10:23:44                                                                          |                        |                                            |                      |                      |                       |          |
| File Name                                                             | E:\Mostafa Alaraby Project\Oxazalone NMR\NMR final oxazalone\MUSTAFA RAD-314_08-04-2015\40fid |                        |                                            |                      | Frequency (MHz)      | 850.15                |          |
| Nucleus                                                               | <sup>1</sup> H                                                                                | Number of Transients   | 20                                         | Origin               | spect                | Original Points Count | 32708    |
| Owner                                                                 | nmr                                                                                           | Points Count           | 32788                                      | Pulse Sequence       | zg30                 | Receiver Gain         | 9.04     |
| SW (cyclical) (Hz)                                                    | 17008.80                                                                                      | Solvent                | DMSO-d6                                    | Spectrum Offset (Hz) | 5250.0283            | Spectrum Type         | STANDARD |
| Sweep Width (Hz)                                                      | 17008.28                                                                                      | Temperature (degree C) | 25.000                                     |                      |                      |                       |          |

<sup>1</sup>H NMR (850 MHz, DMSO-d<sub>6</sub>) δ 9.65 (br. s., 1H), 8.11 (t, *J* = 5.45 Hz, 1H), 7.48 - 7.57 (m, 4H), 7.46 (d, *J* = 15.57 Hz, 1H), 7.37 - 7.40 (m, 2H), 7.27 - 7.34 (m, 2H), 7.26 (d, *J* = 7.78 Hz, 1H), 6.98 - 7.01 (m, 1H), 6.82 (d, *J* = 15.57 Hz, 1H), 3.09 - 3.13 (m, 2H), 1.48 (td, *J* = 7.20, 14.14 Hz, 2H), 0.87 (t, *J* = 7.27 Hz, 3H)

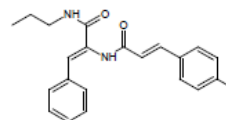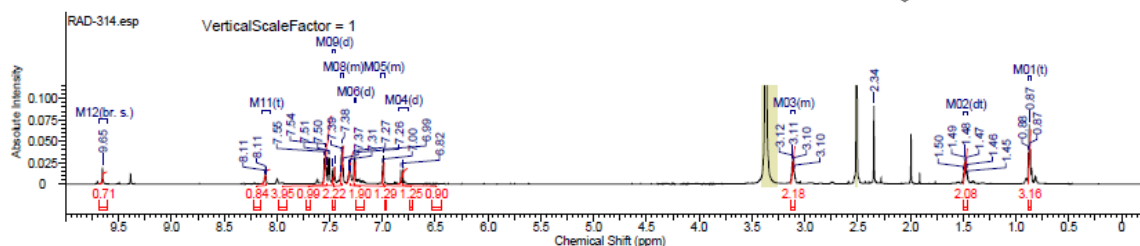

## <sup>13</sup>C NMR

This report was created by ACD/NMR Processor Academic Edition. For more information go to [www.acdlabs.com/nmrproc/](http://www.acdlabs.com/nmrproc/)

### RAD-374

20/09/2016 10:09:40 AM  
Dr.Mustafa Sample : RAD-374 DMSO

|                                                                       |                                                                                                                                         |                  |                                  |                        |                      |
|-----------------------------------------------------------------------|-----------------------------------------------------------------------------------------------------------------------------------------|------------------|----------------------------------|------------------------|----------------------|
| Formula C <sub>21</sub> H <sub>21</sub> N <sub>3</sub> O <sub>3</sub> | FW                                                                                                                                      | 383.4357         |                                  |                        |                      |
| Acquisition Time (sec)                                                | 0.6423                                                                                                                                  | Comment          | Dr.Mustafa Sample : RAD-374 DMSO | Date                   | 20 Apr 2016 14:09:52 |
| Date Stamp                                                            | 20 Apr 2016 14:09:52                                                                                                                    |                  |                                  |                        |                      |
| File Name                                                             | E:\Projects\Mostafa Alaraby Project\Oxazalone\Oxazalone NMR\NMR final oxazalone\13 CNMR New 18-4-2016\MUSTAFA RAD-374_18-04-2016\120fid |                  |                                  |                        |                      |
| Frequency (MHz)                                                       | 213.77                                                                                                                                  | Nucleus          | <sup>13</sup> C                  | Number of Transients   | 963                  |
| Original Points Count                                                 | 32788                                                                                                                                   | Owner            | nmr                              | Points Count           | 32788                |
| Receiver Gain                                                         | 188.03                                                                                                                                  | SW (Hz)          | 51020.41                         | Solvent                | DMSO-d6              |
| Spectrum Type                                                         | STANDARD                                                                                                                                | Sweep Width (Hz) | 51018.85                         | Temperature (degree C) | 25.001               |
|                                                                       |                                                                                                                                         |                  |                                  |                        |                      |
|                                                                       |                                                                                                                                         |                  |                                  |                        |                      |
|                                                                       |                                                                                                                                         |                  |                                  |                        |                      |
|                                                                       |                                                                                                                                         |                  |                                  |                        |                      |
|                                                                       |                                                                                                                                         |                  |                                  |                        |                      |
|                                                                       |                                                                                                                                         |                  |                                  |                        |                      |
|                                                                       |                                                                                                                                         |                  |                                  |                        |                      |
|                                                                       |                                                                                                                                         |                  |                                  |                        |                      |
|                                                                       |                                                                                                                                         |                  |                                  |                        |                      |
|                                                                       |                                                                                                                                         |                  |                                  |                        |                      |
|                                                                       |                                                                                                                                         |                  |                                  |                        |                      |
|                                                                       |                                                                                                                                         |                  |                                  |                        |                      |
|                                                                       |                                                                                                                                         |                  |                                  |                        |                      |
|                                                                       |                                                                                                                                         |                  |                                  |                        |                      |
|                                                                       |                                                                                                                                         |                  |                                  |                        |                      |
|                                                                       |                                                                                                                                         |                  |                                  |                        |                      |
|                                                                       |                                                                                                                                         |                  |                                  |                        |                      |
|                                                                       |                                                                                                                                         |                  |                                  |                        |                      |
|                                                                       |                                                                                                                                         |                  |                                  |                        |                      |
|                                                                       |                                                                                                                                         |                  |                                  |                        |                      |
|                                                                       |                                                                                                                                         |                  |                                  |                        |                      |
|                                                                       |                                                                                                                                         |                  |                                  |                        |                      |
|                                                                       |                                                                                                                                         |                  |                                  |                        |                      |
|                                                                       |                                                                                                                                         |                  |                                  |                        |                      |
|                                                                       |                                                                                                                                         |                  |                                  |                        |                      |
|                                                                       |                                                                                                                                         |                  |                                  |                        |                      |
|                                                                       |                                                                                                                                         |                  |                                  |                        |                      |
|                                                                       |                                                                                                                                         |                  |                                  |                        |                      |
|                                                                       |                                                                                                                                         |                  |                                  |                        |                      |
|                                                                       |                                                                                                                                         |                  |                                  |                        |                      |
|                                                                       |                                                                                                                                         |                  |                                  |                        |                      |
|                                                                       |                                                                                                                                         |                  |                                  |                        |                      |
|                                                                       |                                                                                                                                         |                  |                                  |                        |                      |
|                                                                       |                                                                                                                                         |                  |                                  |                        |                      |
|                                                                       |                                                                                                                                         |                  |                                  |                        |                      |
|                                                                       |                                                                                                                                         |                  |                                  |                        |                      |
|                                                                       |                                                                                                                                         |                  |                                  |                        |                      |
|                                                                       |                                                                                                                                         |                  |                                  |                        |                      |
|                                                                       |                                                                                                                                         |                  |                                  |                        |                      |
|                                                                       |                                                                                                                                         |                  |                                  |                        |                      |
|                                                                       |                                                                                                                                         |                  |                                  |                        |                      |
|                                                                       |                                                                                                                                         |                  |                                  |                        |                      |
|                                                                       |                                                                                                                                         |                  |                                  |                        |                      |
|                                                                       |                                                                                                                                         |                  |                                  |                        |                      |
|                                                                       |                                                                                                                                         |                  |                                  |                        |                      |
|                                                                       |                                                                                                                                         |                  |                                  |                        |                      |
|                                                                       |                                                                                                                                         |                  |                                  |                        |                      |
|                                                                       |                                                                                                                                         |                  |                                  |                        |                      |
|                                                                       |                                                                                                                                         |                  |                                  |                        |                      |
|                                                                       |                                                                                                                                         |                  |                                  |                        |                      |
|                                                                       |                                                                                                                                         |                  |                                  |                        |                      |
|                                                                       |                                                                                                                                         |                  |                                  |                        |                      |
|                                                                       |                                                                                                                                         |                  |                                  |                        |                      |
|                                                                       |                                                                                                                                         |                  |                                  |                        |                      |
|                                                                       |                                                                                                                                         |                  |                                  |                        |                      |
|                                                                       |                                                                                                                                         |                  |                                  |                        |                      |
|                                                                       |                                                                                                                                         |                  |                                  |                        |                      |
|                                                                       |                                                                                                                                         |                  |                                  |                        |                      |
|                                                                       |                                                                                                                                         |                  |                                  |                        |                      |
|                                                                       |                                                                                                                                         |                  |                                  |                        |                      |
|                                                                       |                                                                                                                                         |                  |                                  |                        |                      |
|                                                                       |                                                                                                                                         |                  |                                  |                        |                      |
|                                                                       |                                                                                                                                         |                  |                                  |                        |                      |
|                                                                       |                                                                                                                                         |                  |                                  |                        |                      |
|                                                                       |                                                                                                                                         |                  |                                  |                        |                      |
|                                                                       |                                                                                                                                         |                  |                                  |                        |                      |
|                                                                       |                                                                                                                                         |                  |                                  |                        |                      |
|                                                                       |                                                                                                                                         |                  |                                  |                        |                      |
|                                                                       |                                                                                                                                         |                  |                                  |                        |                      |
|                                                                       |                                                                                                                                         |                  |                                  |                        |                      |
|                                                                       |                                                                                                                                         |                  |                                  |                        |                      |
|                                                                       |                                                                                                                                         |                  |                                  |                        |                      |
|                                                                       |                                                                                                                                         |                  |                                  |                        |                      |
|                                                                       |                                                                                                                                         |                  |                                  |                        |                      |
|                                                                       |                                                                                                                                         |                  |                                  |                        |                      |
|                                                                       |                                                                                                                                         |                  |                                  |                        |                      |
|                                                                       |                                                                                                                                         |                  |                                  |                        |                      |
|                                                                       |                                                                                                                                         |                  |                                  |                        |                      |
|                                                                       |                                                                                                                                         |                  |                                  |                        |                      |
|                                                                       |                                                                                                                                         |                  |                                  |                        |                      |
|                                                                       |                                                                                                                                         |                  |                                  |                        |                      |
|                                                                       |                                                                                                                                         |                  |                                  |                        |                      |
|                                                                       |                                                                                                                                         |                  |                                  |                        |                      |
|                                                                       |                                                                                                                                         |                  |                                  |                        |                      |
|                                                                       |                                                                                                                                         |                  |                                  |                        |                      |
|                                                                       |                                                                                                                                         |                  |                                  |                        |                      |
|                                                                       |                                                                                                                                         |                  |                                  |                        |                      |
|                                                                       |                                                                                                                                         |                  |                                  |                        |                      |
|                                                                       |                                                                                                                                         |                  |                                  |                        |                      |
|                                                                       |                                                                                                                                         |                  |                                  |                        |                      |
|                                                                       |                                                                                                                                         |                  |                                  |                        |                      |
|                                                                       |                                                                                                                                         |                  |                                  |                        |                      |
|                                                                       |                                                                                                                                         |                  |                                  |                        |                      |
|                                                                       |                                                                                                                                         |                  |                                  |                        |                      |
|                                                                       |                                                                                                                                         |                  |                                  |                        |                      |
|                                                                       |                                                                                                                                         |                  |                                  |                        |                      |
|                                                                       |                                                                                                                                         |                  |                                  |                        |                      |
|                                                                       |                                                                                                                                         |                  |                                  |                        |                      |
|                                                                       |                                                                                                                                         |                  |                                  |                        |                      |
|                                                                       |                                                                                                                                         |                  |                                  |                        |                      |
|                                                                       |                                                                                                                                         |                  |                                  |                        |                      |
|                                                                       |                                                                                                                                         |                  |                                  |                        |                      |
|                                                                       |                                                                                                                                         |                  |                                  |                        |                      |
|                                                                       |                                                                                                                                         |                  |                                  |                        |                      |
|                                                                       |                                                                                                                                         |                  |                                  |                        |                      |
|                                                                       |                                                                                                                                         |                  |                                  |                        |                      |
|                                                                       |                                                                                                                                         |                  |                                  |                        |                      |
|                                                                       |                                                                                                                                         |                  |                                  |                        |                      |
|                                                                       |                                                                                                                                         |                  |                                  |                        |                      |
|                                                                       |                                                                                                                                         |                  |                                  |                        |                      |
|                                                                       |                                                                                                                                         |                  |                                  |                        |                      |
|                                                                       |                                                                                                                                         |                  |                                  |                        |                      |
|                                                                       |                                                                                                                                         |                  |                                  |                        |                      |
|                                                                       |                                                                                                                                         |                  |                                  |                        |                      |
|                                                                       |                                                                                                                                         |                  |                                  |                        |                      |
|                                                                       |                                                                                                                                         |                  |                                  |                        |                      |
|                                                                       |                                                                                                                                         |                  |                                  |                        |                      |
|                                                                       |                                                                                                                                         |                  |                                  |                        |                      |
|                                                                       |                                                                                                                                         |                  |                                  |                        |                      |
|                                                                       |                                                                                                                                         |                  |                                  |                        |                      |
|                                                                       |                                                                                                                                         |                  |                                  |                        |                      |
|                                                                       |                                                                                                                                         |                  |                                  |                        |                      |
|                                                                       |                                                                                                                                         |                  |                                  |                        |                      |
|                                                                       |                                                                                                                                         |                  |                                  |                        |                      |
|                                                                       |                                                                                                                                         |                  |                                  |                        |                      |
|                                                                       |                                                                                                                                         |                  |                                  |                        |                      |
|                                                                       |                                                                                                                                         |                  |                                  |                        |                      |
|                                                                       |                                                                                                                                         |                  |                                  |                        |                      |
|                                                                       |                                                                                                                                         |                  |                                  |                        |                      |
|                                                                       |                                                                                                                                         |                  |                                  |                        |                      |
|                                                                       |                                                                                                                                         |                  |                                  |                        |                      |
|                                                                       |                                                                                                                                         |                  |                                  |                        |                      |
|                                                                       |                                                                                                                                         |                  |                                  |                        |                      |
|                                                                       |                                                                                                                                         |                  |                                  |                        |                      |
|                                                                       |                                                                                                                                         |                  |                                  |                        |                      |
|                                                                       |                                                                                                                                         |                  |                                  |                        |                      |
|                                                                       |                                                                                                                                         |                  |                                  |                        |                      |
|                                                                       |                                                                                                                                         |                  |                                  |                        |                      |
|                                                                       |                                                                                                                                         |                  |                                  |                        |                      |
|                                                                       |                                                                                                                                         |                  |                                  |                        |                      |
|                                                                       |                                                                                                                                         |                  |                                  |                        |                      |
|                                                                       |                                                                                                                                         |                  |                                  |                        |                      |
|                                                                       |                                                                                                                                         |                  |                                  |                        |                      |
|                                                                       |                                                                                                                                         |                  |                                  |                        |                      |
|                                                                       |                                                                                                                                         |                  |                                  |                        |                      |
|                                                                       |                                                                                                                                         |                  |                                  |                        |                      |
|                                                                       |                                                                                                                                         |                  |                                  |                        |                      |
|                                                                       |                                                                                                                                         |                  |                                  |                        |                      |
|                                                                       |                                                                                                                                         |                  |                                  |                        |                      |
|                                                                       |                                                                                                                                         |                  |                                  |                        |                      |
|                                                                       |                                                                                                                                         |                  |                                  |                        |                      |
|                                                                       |                                                                                                                                         |                  |                                  |                        |                      |
|                                                                       |                                                                                                                                         |                  |                                  |                        |                      |
|                                                                       |                                                                                                                                         |                  |                                  |                        |                      |
|                                                                       |                                                                                                                                         |                  |                                  |                        |                      |
|                                                                       |                                                                                                                                         |                  |                                  |                        |                      |
|                                                                       |                                                                                                                                         |                  |                                  |                        |                      |
|                                                                       |                                                                                                                                         |                  |                                  |                        |                      |
|                                                                       |                                                                                                                                         |                  |                                  |                        |                      |
|                                                                       |                                                                                                                                         |                  |                                  |                        |                      |
|                                                                       |                                                                                                                                         |                  |                                  |                        |                      |
|                                                                       |                                                                                                                                         |                  |                                  |                        |                      |
|                                                                       |                                                                                                                                         |                  |                                  |                        |                      |
|                                                                       |                                                                                                                                         |                  |                                  |                        |                      |
|                                                                       |                                                                                                                                         |                  |                                  |                        |                      |
|                                                                       |                                                                                                                                         |                  |                                  |                        |                      |
|                                                                       |                                                                                                                                         |                  |                                  |                        |                      |
|                                                                       |                                                                                                                                         |                  |                                  |                        |                      |
|                                                                       |                                                                                                                                         |                  |                                  |                        |                      |
|                                                                       |                                                                                                                                         |                  |                                  |                        |                      |
|                                                                       |                                                                                                                                         |                  |                                  |                        |                      |
|                                                                       |                                                                                                                                         |                  |                                  |                        |                      |
|                                                                       |                                                                                                                                         |                  |                                  |                        |                      |
|                                                                       |                                                                                                                                         |                  |                                  |                        |                      |
|                                                                       |                                                                                                                                         |                  |                                  |                        |                      |
|                                                                       |                                                                                                                                         |                  |                                  |                        |                      |
|                                                                       |                                                                                                                                         |                  |                                  |                        |                      |
|                                                                       |                                                                                                                                         |                  |                                  |                        |                      |
|                                                                       |                                                                                                                                         |                  |                                  |                        |                      |
|                                                                       |                                                                                                                                         |                  |                                  |                        |                      |
|                                                                       |                                                                                                                                         |                  |                                  |                        |                      |
|                                                                       |                                                                                                                                         |                  |                                  |                        |                      |
|                                                                       |                                                                                                                                         |                  |                                  |                        |                      |
|                                                                       |                                                                                                                                         |                  |                                  |                        |                      |
|                                                                       |                                                                                                                                         |                  |                                  |                        |                      |
| </                                                                    |                                                                                                                                         |                  |                                  |                        |                      |

<sup>13</sup>C NMR (125 MHz, DMSO-d<sub>6</sub>) δ 164.8, 164.5, 146.4, 141.8, 140.5, 139.9, 133.9, 131.9, 130.1, 129.7, 127.9, 123.7, 122.8, 120.3, 41.1, 39.8, 39.7, 39.6, 39.4, 39.3, 39.2, 22.3, 21.1, 11.5

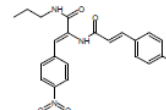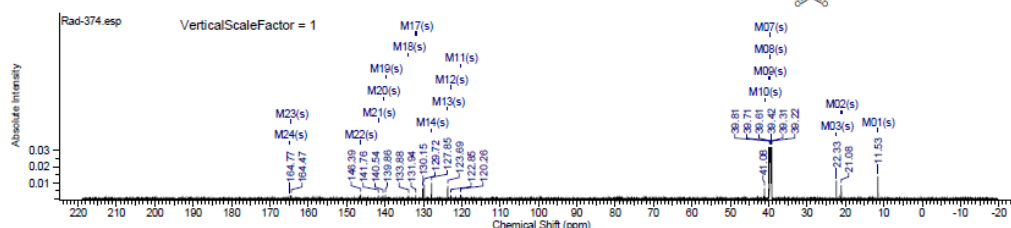

## Spectra of (5112)

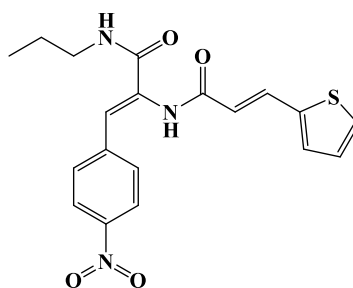

### LC/MS

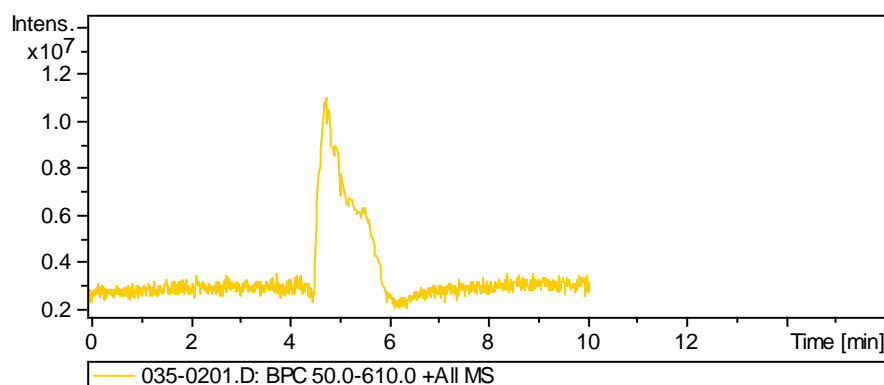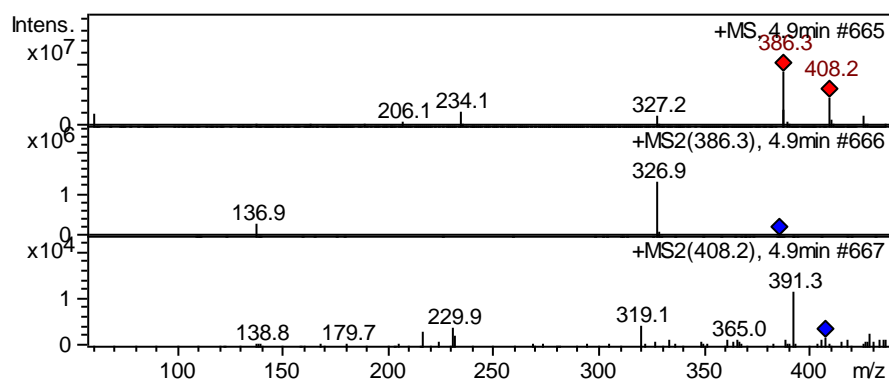

### FT-IR

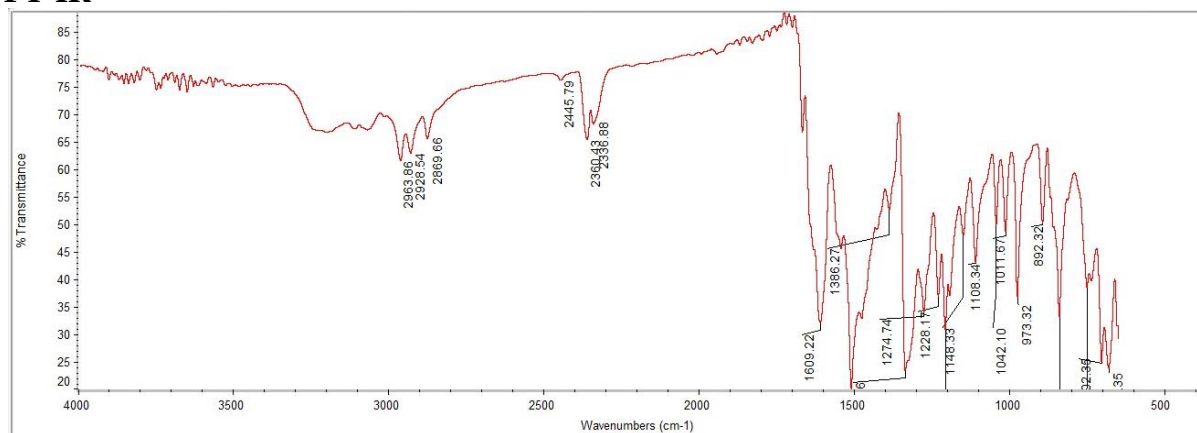

<sup>1</sup>H NMRThis report was created by ACD/NMR Processor Academic Edition. For more information go to [www.acdlabs.com/nmrproc/](http://www.acdlabs.com/nmrproc/)

## RAD-375

09/11/2016 8:47:48 AM

Dr. Mustafa Sample : RAD-375 DMSO PROTON DMSO (D:Magdy) nmr 24

|                        |                                                                                                |                        |                                                                |
|------------------------|------------------------------------------------------------------------------------------------|------------------------|----------------------------------------------------------------|
| Formula                | C <sub>16</sub> H <sub>14</sub> N <sub>2</sub> O <sub>5</sub> S                                | FW                     | 385.4369                                                       |
| Acquisition Time (sec) | 2.6564                                                                                         | Comment                | Dr. Mustafa Sample : RAD-375 DMSO PROTON DMSO (D:Magdy) nmr 24 |
| Date                   | 18 Jun 2015 15:37:04                                                                           | Date Stamp             | 18 Jun 2015 15:37:04                                           |
| File Name              | E:\Mostafa Alaraby Project\Oxazolone NMR\NMR final oxazolone\MUSTAFA RAD-375 18-06-2015\10.fid | Frequency (MHz)        | 600.15                                                         |
| Nucleus                | 1H                                                                                             | Number of Transients   | 32                                                             |
| Owner                  | nmr                                                                                            | Points Count           | 32768                                                          |
| SW (cyclical) (Hz)     | 12335.53                                                                                       | Solvent                | DMSO-d6                                                        |
| Sweep Width (Hz)       | 12335.15                                                                                       | Temperature (degree C) | 25.000                                                         |
|                        |                                                                                                | Pulse Sequence         | zg30                                                           |
|                        |                                                                                                | Spectrum Offset (Hz)   | 3706.1750                                                      |
|                        |                                                                                                | Receiver Gain          | 144.00                                                         |
|                        |                                                                                                | Spectrum Type          | STANDARD                                                       |

<sup>1</sup>H NMR (600 MHz, DMSO-d<sub>6</sub>) δ 9.89 (s, 1H), 8.32 (t, *J* = 5.65 Hz, 1H), 8.22 - 8.25 (m, *J* = 9.04 Hz, 2H), 7.74 - 7.78 (m, *J* = 9.03 Hz, 2H), 7.64 - 7.69 (m, 2H), 7.45 (d, *J* = 3.39 Hz, 1H), 7.15 (dd, *J* = 3.58, 5.08 Hz, 1H), 6.95 (s, 1H), 6.60 (d, *J* = 15.43 Hz, 1H), 3.12 (q, *J* = 6.40 Hz, 2H), 1.50 (sxt, *J* = 7.30 Hz, 2H), 0.89 (t, *J* = 7.53 Hz, 3H)

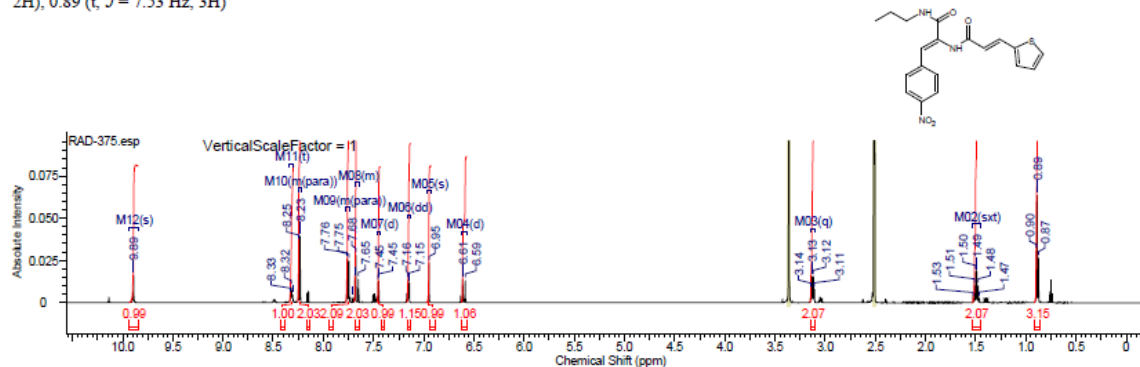<sup>13</sup>C NMRThis report was created by ACD/NMR Processor Academic Edition. For more information go to [www.acdlabs.com/nmrproc/](http://www.acdlabs.com/nmrproc/)

## RAD-375

20/09/2016 10:12:35 AM

Dr. Mustafa Sample : RAD-375 DMSO

|                        |                                                                                                                                         |                        |                                   |
|------------------------|-----------------------------------------------------------------------------------------------------------------------------------------|------------------------|-----------------------------------|
| Formula                | C <sub>16</sub> H <sub>14</sub> N <sub>2</sub> O <sub>5</sub> S                                                                         | FW                     | 385.4369                          |
| Acquisition Time (sec) | 0.8423                                                                                                                                  | Comment                | Dr. Mustafa Sample : RAD-375 DMSO |
| Date Stamp             | 18 Apr 2016 22:48:16                                                                                                                    | Date                   | 18 Apr 2016 22:48:16              |
| File Name              | E:\Projects\Mostafa Alaraby Project\Oxazolone\Oxazolone NMR\NMR final oxazolone\13 CNMR New 18-4-2016\MUSTAFA RAD-375 18-04-2016\50.fid | Frequency (MHz)        | 213.77                            |
| Nucleus                | 13C                                                                                                                                     | Number of Transients   | 3072                              |
| Original Points Count  | 32768                                                                                                                                   | Owner                  | nmr                               |
| Receiver Gain          | 186.93                                                                                                                                  | Points Count           | 32768                             |
| SW (cyclical) (Hz)     | 51020.41                                                                                                                                | Pulse Sequence         | zgpg30                            |
| Spectrum Type          | STANDARD                                                                                                                                | Solvent                | DMSO-d6                           |
|                        |                                                                                                                                         | Spectrum Offset (Hz)   | 21293.8125                        |
|                        |                                                                                                                                         | Temperature (degree C) | 24.998                            |

<sup>13</sup>C NMR (214 MHz, DMSO-d<sub>6</sub>) δ 164.7, 164.1, 146.4, 141.7, 139.7, 133.7, 133.6, 131.6, 130.1, 128.7, 128.6, 123.7, 123.0, 120.0, 41.1, 39.8, 39.7, 39.6, 39.4, 39.3, 39.2, 22.3, 11.5

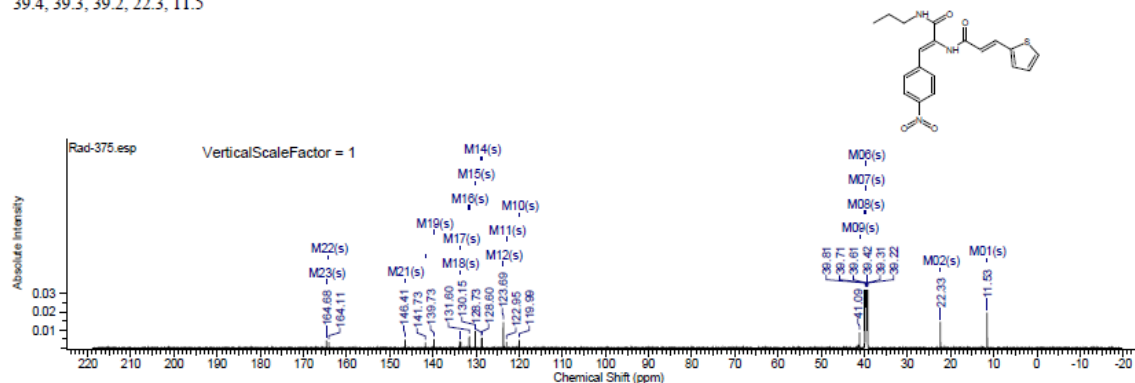

## II. Further Data on LD50 determination

**Chart of the OECD protocol, Guideline 423**  
**OECD Guideline for testing of chemicals**  
**Acute Oral Toxicity – Acute Toxic Class Method**

[https://ntp.niehs.nih.gov/iccvm/suppdocs/feddocs/oecd/oecd\\_gl423.pdf](https://ntp.niehs.nih.gov/iccvm/suppdocs/feddocs/oecd/oecd_gl423.pdf)

OECD/OCDE

423

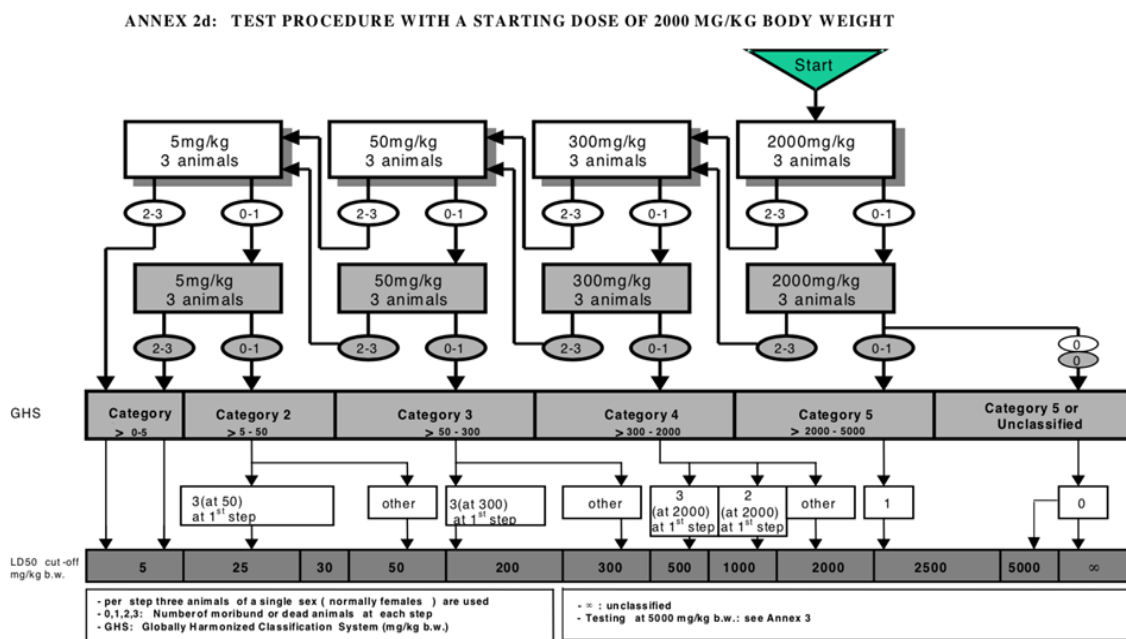

### III. References for Reported Compounds

1. Heiss, E. H.; Schilder, Y. D.; Dirsch, V. M., Chronic treatment with resveratrol induces redox stress- and ataxia telangiectasia-mutated (ATM)-dependent senescence in p53-positive cancer cells. *J Biol Chem* **2007**, 282 (37), 26759-66.
2. Fahmy, A.; Orabi, M., REACTIONS OF 4-ARYLIDENE-2-STYRYL-5 (4)-OXAZOLONES AND RELATED COMPOUNDS. *INDIAN JOURNAL OF CHEMISTRY* **1972**, 10 (10), 961-964.
3. Tripathy, P. K.; Mukerjee, A. K., A facile synthesis of N-substituted 2-acylamino-2-alkenamides. *Synthesis* **1985**, 1985 (03), 285-288.
4. Mustafa, A.; Asker, W.; Harhash, A. H.; Abdin, T.; Zayed, E. M., Reaktionen mit 2.4-disubstituierten  $\Delta^2$ -Oxazolinonen-(5). *Justus Liebigs Annalen der Chemie* **1968**, 714 (1), 146-154.
5. Mustafa, A.; Asker, W.; Harhash, A. H.; Abdin, T. M. S.; Zayed, E. M., Reaktionen mit 2.4-disubstituierten  $\Delta^2$ -Oxazolinonen-(5). *Justus Liebigs Annalen der Chemie* **1968**, 714 (1), 146-154.
